# Supplementary material
Source: PubMed Central journal article supplement (PMC3752255)
Supplement: 1304346110_sapp.pdf [file 1304346110_sapp.pdf]

## **SUPPORTING INFORMATION APPENDIX**

### **A Combination of Directing Groups and Chiral Anion Phase-Transfer Catalysis for Enantioselective Fluorination of Alkenes**

Jeffrey Wu, Yi-Ming Wang, Amela Drljevic, Vivek Rauniyar, Robert J. Phipps, F. Dean Toste\*

Department of Chemistry, University of California, Berkeley, CA 94720

#### **CONTENTS**

**p. 2. General information**

**pp. 3-4. Synthesis of substrates**

**p 5. General procedure for fluorination reactions**

**pp. 5-15. Characterization data**

**pp. 15-38. X-Ray crystallography data**

**(NMR and HPLC spectra follow)**

## Supporting Information

**General Information.** Unless otherwise noted, reagents were obtained from commercial sources and used without further purification. All reactions were carried out under N<sub>2</sub> using Schlenk line techniques, unless otherwise stated. Dry and degassed THF, dichloromethane, diethyl ether, toluene, triethylamine, and dimethylformamide were obtained by passage through activated alumina columns under argon. All other dried solvents were obtained by storage over 3Å or 4Å molecular sieves overnight. TLC analysis of reaction mixtures was performed on Merck silica gel 60 F254 TLC plates and visualized by UV. Flash chromatography was carried out with ICN SiliTech 32-63 D 60 Å silica gel. Standard aqueous workup refers to extraction with the indicated solvent, followed by drying of the combined organic layers with magnesium sulfate, gravity filtration, and removal of solvent by rotary evaporation. <sup>1</sup>H and <sup>13</sup>C NMR spectra were recorded with Bruker AV-300, AVQ-400, AVB-400, AV-500, DRX-500, and AV-600 spectrometers and were referenced to <sup>1</sup>H (residual) and <sup>13</sup>C signals of the deuterated solvents, respectively.<sup>1</sup> Mass spectral and microanalytical data were obtained via the Micro-Mass/Analytical Facility operated by the College of Chemistry, University of California, Berkeley. X-Ray crystallographic analysis was carried out by Dr. Antonio DiPasquale at the College of Chemistry X-Ray Crystallographic Facility (CHEXRAY, University of California, Berkeley).

---

<sup>1</sup> According to values listed in Fulmer, G. R.; Miller, A. J. M.; Sherden, N. H.; Gottlieb, H. E.; Nudelman, A.; Stoltz, B. M.; Bercaw, J. E.; Goldberg, K. I. *Organometallics*, 2010, 29 (9), pp 2176–2179.

## Representative synthesis of substrates

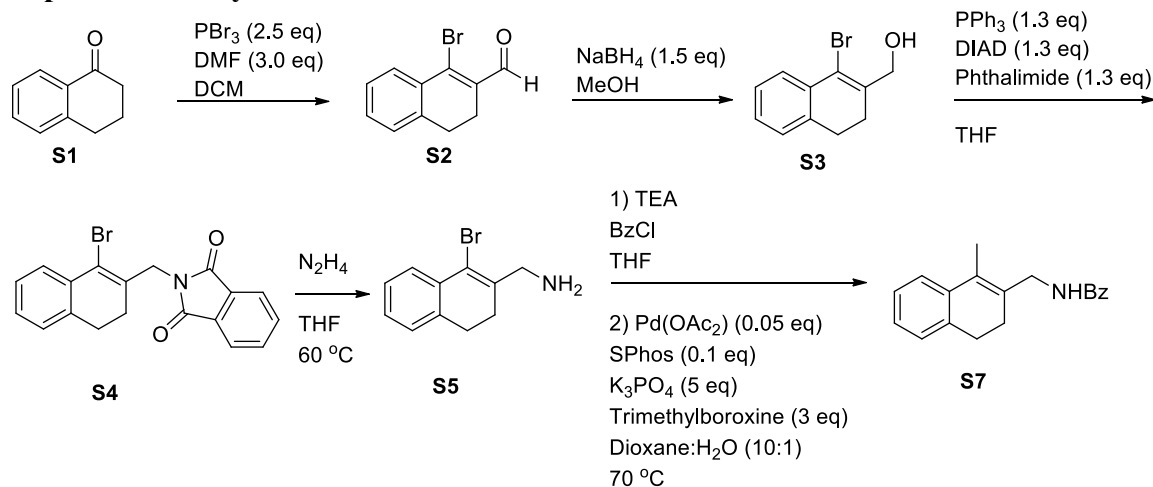

PBr<sub>3</sub> (8 mL, 2.5 equiv.) was added to DMF (7.8 mL, 3.0 equiv.) in DCM (150 mL) at 0 °C then warmed to room temperature for 1.5 h. Starting material tetralone (5 g, 33.7 mmol) was added as a solution in DCM (15 mL), then the mixture was refluxed. The reaction was quenched with water at 0 °C followed by 20 min of stirring and extraction with DCM. The organic phase was washed with brine and dried with magnesium sulfate. NaBH<sub>4</sub> (0.19 g, 1 equiv.) was added to **S2** (4.94 mmol) in MeOH (30 mL) at 0 °C and stirred for one hour. The reaction was warmed up to room temperature and stirred another hour before evaporation of the solvent. The crude mixture was partitioned between methylene chloride and water, and the organic layer separated, dried with magnesium sulfate, and chromatographed (EtOAc: Hex; 3:1) to provide white solid **S3** (88% yield).

**S3** was combined with PPh<sub>3</sub> (1.3 equiv) and phthalimide (1.3 equiv) in THF and cooled to 0 °C, followed by slow addition (over 30 min.) of DIAD (1.3 equiv). The reaction was warmed up to room temperature and stirred another 2 h, followed by direct silica-gel chromatography (EtOAc: Hex, 4:1) to provide solid **S4** (57%).

Hydrazine hydrate (7 equiv) was added to **S4** in THF and heated to 60 °C for 16 h. The reaction mixture was diluted with methylene chloride and filtered with Celite. The organic layer was washed with water, then brine, and dried with magnesium sulfate to provide amine **S5** (95%).

Triethylamine and benzoyl chloride were added to **S5** in THF at 0 °C, and warmed up to room temperature immediately. The reaction was stirred for 8 h followed by filtration with Celite. The filtrate was partitioned between ethyl acetate and water, and the organic layer was separated, washed with brine, and dried with magnesium sulfate. Silica gel chromatography (EtOAc: Hex, 4:1) provided **S6** (85%).

Pd(OAc)<sub>2</sub> (0.05 equiv), SPhos (0.1 equiv), K<sub>3</sub>PO<sub>4</sub> (5 equiv), and trimethylboroxine (3 equiv) were added to **S6** in dioxane:H<sub>2</sub>O (10:1, 0.2 M) at room temperature, then heated to 70 °C for 18 h. The reaction mixture was filtered with Celite, followed by extraction with ethyl acetate. The organic layer was washed with ammonium chloride (sat. aq.), followed by water, then brine, and then dried with magnesium sulfate. Chromatography (EtOAc: Hex, 4:1) provided **S7** (80%).

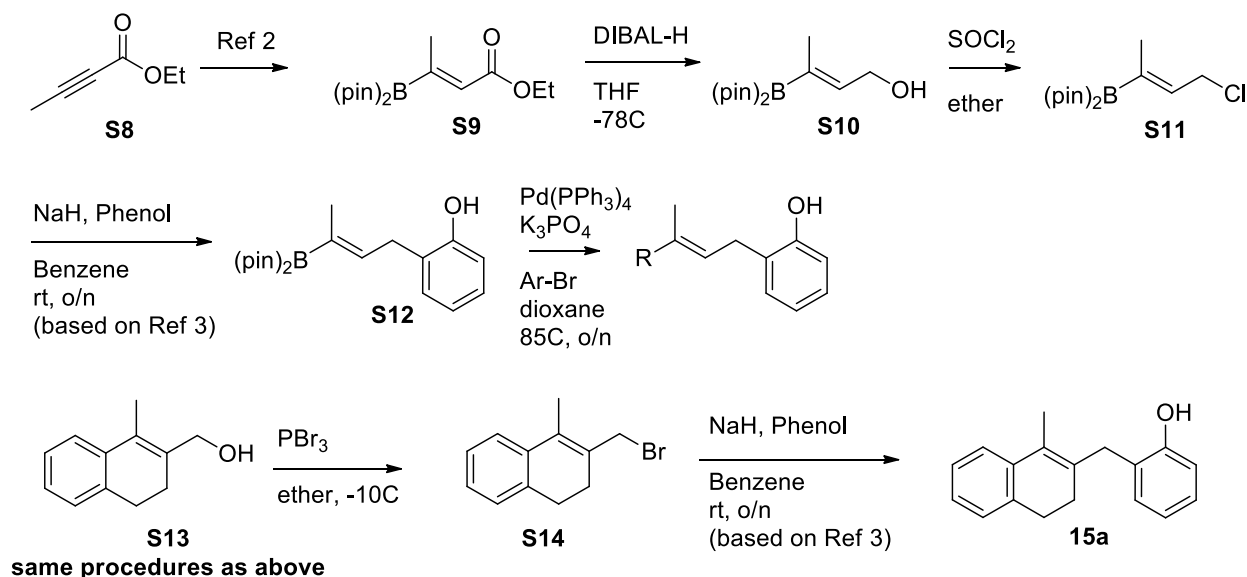

**S9** was prepared from **S8** by a precedented method.<sup>2</sup> Dropwise DIBAL-H addition to a THF solution of **S9** at  $-78^\circ\text{C}$  followed by stirring for 2 h, the reaction was warmed up to  $0^\circ\text{C}$  and quenched with sodium sulfate decahydrate. Vigorous stirring followed by filtration with Celite provided **S10** as an oil. Purification was done with silica gel column chromatography (0-30% EtOAc in Hexanes); fractions visualized by iodine stain.

Thionyl chloride was added dropwise to **S10** in ether at  $0^\circ\text{C}$  and the reaction was stirred for 3 h. The reaction was quenched with sodium bicarbonate (saturated aqueous solution) and extracted with ether. The organic layer was washed with brine, dried with magnesium sulfate and used without further purification.

Phenol and sodium hydride were combined at  $0^\circ\text{C}$  in benzene as a slurry. After 15 minutes of stirring, allylic chloride **S11** was added as a solution in benzene. The reaction stirred at rt for 18 h followed by evaporation of solvent, followed by aqueous workup as described in the literature.<sup>3</sup> **S12** was subjected to  $\text{Pd}(\text{PPh}_3)_4$ ,  $\text{K}_3\text{PO}_4$ , and ArBr in dioxane under nitrogen at  $85^\circ\text{C}$  for 18 h, followed by filtration with Celite. Silica gel column chromatography (0-25% EtOAc in Hexanes) provided substrates.

$\text{SOCl}_2$  was added as a solution in DCM to **S13** (which was prepared with procedures described on the previous page) in diethyl ether at  $0^\circ\text{C}$ . The reaction was quenched after 3 h at room temperature, with sodium bicarbonate (saturated aqueous solution), then extracted with ether. The organic layer was washed with brine, dried with magnesium sulfate, concentrated and used without further purification.

Substrate **15a** were prepared following the procedure used with intermediate **S11**.<sup>3</sup>

2. Ji-Eon Lee, Jisook Kwon and Jaesook Yun, *Chem. Commun.*, **2008**, 733-734.

3. Raissa M. Trend, Yeeman K. Ramtohul, and Brian M. Stoltz. *J. Am. Chem. Soc.*, **2005**, 127 (50), 17778-17788.



**General procedure for phase transfer fluorination reactions.** A one dram vial was charged with substrate (0.05-0.10 mmol), toluene (0.03 M in substrate), and a 1/2'' × 1/8'' magnetic stirbar. Phosphoric acid catalyst (0.10 eq), Selectfluor (1.35 eq), and sodium carbonate (1.45 eq) were added under air, and the reaction mixture was stirred vigorously for 18 h. The reaction mixture was then directly subjected to column chromatography to afford the fluorinated product. For the one-pot dihalogenation reaction, bromination reagent (1.35 eq) and sodium carbonate (1.45 eq) were added to the reaction vial after fluorination for 18 h. The reaction mixture was stirred for an additional 18 h, and the desired dihalogenation product was isolated by column chromatography.

**Characterization data of substrates and products – proton, carbon, fluorine NMR where applicable; HRMS or elemental analysis.**

**1a**

<sup>1</sup>H-NMR (500 MHz, CDCl<sub>3</sub>) δ (ppm) 7.73 (d, J = 8.5 Hz, 2H), 7.47 (d, J = 8.5 Hz, 2H), 7.34-7.14 (m, 4H), 6.06 (s, 1H), 4.35 (d, J = 5 Hz, 2H), 2.77 (t, J = 7.5 Hz, 2H), 2.37-2.34 (m, 2H), 2.18 (s, 3H), 1.35 (s, 9H). <sup>13</sup>C NMR (125 MHz, CDCl<sub>3</sub>) δ (ppm) 167.7, 155.0, 136.4, 135.8, 131.9, 131.7, 129.2, 127.2, 126.9, 126.7, 126.5, 125.5, 123.3, 42.2, 35.0, 31.2, 28.5, 26.9, 14.3. HRMS (ESI) Calcd. [M+H] C<sub>23</sub>H<sub>28</sub>ON: 334.2165; found: 334.2170.

**1b**

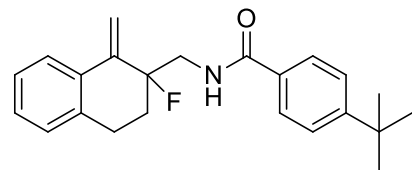

<sup>1</sup>H-NMR (500 MHz, CDCl<sub>3</sub>) δ (ppm) 7.75 (d, J = 8.5 Hz, 2H), 7.63 (d, J = 7 Hz, 1H), 7.49 (d, J = 8.5 Hz, 2H), 7.28-7.21 (m, 2H), 7.16-7.15 (m, 1H), 6.47 (s, 1H), 5.75 (s, 1H), 5.50 (s, 1H), 4.24-4.13 (m, 1H), 3.48-3.42 (m, 1H), 3.16-3.12 (m, 1H), 2.99-2.94 (m, 1H), 2.26-2.14 (m, 2H), 1.36 (s, 9H). <sup>13</sup>C NMR (125 MHz, CDCl<sub>3</sub>) δ (ppm) 167.3, 155.2, 143.9 (d, J<sub>C-F</sub> = 16.1 Hz), 134.9, 132.5, 131.3, 128.9, 128.4, 128.0, 126.8, 126.5, 125.6, 125.1, 124.8, 108.9 (d, J<sub>C-F</sub> = 12.1 Hz), 96.5 (d, J<sub>C-F</sub> = 180 Hz), 44.7 (d, J<sub>C-F</sub> = 24.1 Hz), 34.9, 31.1, 30.3 (d, J<sub>C-F</sub> = 21.1 Hz), 26.9 (d, J<sub>C-F</sub> = 11.1 Hz). <sup>19</sup>F-NMR (376.4 MHz) δ (ppm) -161.0 - -161.2 (m).

HRMS (ESI) Calcd. for [M+H] C<sub>23</sub>H<sub>27</sub>ONF: 352.2071; found: 352.2074.

HPLC (ChiralPak IC column) 92:08 (hexane:*i*PrOH) 1mL/min; T<sub>major</sub> (22.172 min), T<sub>minor</sub> (25.260 min)

Catalysts **2-4** are either commercially available or previously reported.

**5a**

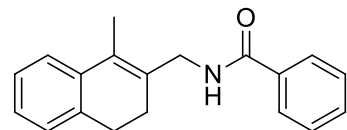

<sup>1</sup>H-NMR (500 MHz, CDCl<sub>3</sub>) δ (ppm) 7.79 (d, J = 7.0 Hz, 2H), 7.54-7.44 (m, 3H), 7.34-7.32 (m, 1H), 7.26-7.19 (m, 1H), 7.18-7.14 (m, 2H), 6.10 (brs, 1H), 4.36 (d, J = 5.5 Hz, 2H), 2.78 (t, J = 7.5 Hz, 2H), 2.37 (t, J = 7 Hz, 2H), 2.18 (s, 3H). <sup>13</sup>C NMR (125 MHz,

CDCl<sub>3</sub>)  $\delta$  (ppm) 167.7, 136.3, 135.8, 134.6, 131.6, 131.5, 129.5, 128.7, 127.2, 126.9, 126.8, 126.5, 123.3, 42.4, 28.5, 27.0, 14.3.

HRMS (ESI) Calcd. for [M+H]C<sub>19</sub>H<sub>20</sub>ON 278.1539, found: 278.1547.

### 5b

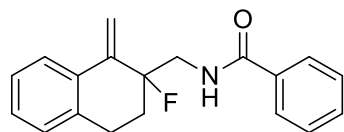

<sup>1</sup>H-NMR (500 MHz, CDCl<sub>3</sub>)  $\delta$  (ppm) 7.81 (d,  $J$  = 7.5 Hz, 2H), 7.63 (d,  $J$  = 7.5 Hz, 1H), 7.56-7.53 (m, 1H), 7.49-7.46 (m, 2H), 7.26-7.21 (m, 2H), 7.16-7.15 (m, 1H), 6.49 (brs, 1H), 5.75 (s, 1H), 5.51 (s, 1H), 4.23-4.13 (m, 1H), 3.50-3.43 (m, 1H), 3.19-3.12 (m, 1H), 2.99-2.96 (m, 1H), 2.27-2.12 (m, 2H). <sup>13</sup>C NMR (125 MHz, CDCl<sub>3</sub>)  $\delta$  (ppm) 167.5, 143.9 (d,  $J_{C-F}$  = 16.3 Hz), 134.9, 134.3, 132.5, 131.7, 129.0, 128.7, 128.5, 128.1, 127.1 (d,  $J_{C-F}$  = 19.0 Hz), 126.6, 124.9, 109.0 (d,  $J_{C-F}$  = 11.3 Hz), 97.2, 95.8, 44.8 (d,  $J_{C-F}$  = 25.0 Hz), 30.4 (d,  $J_{C-F}$  = 21.3 Hz), 27.0 (d,  $J_{C-F}$  = 11.3 Hz). <sup>19</sup>F-NMR (376.5 MHz)  $\delta$  (ppm) -150.03 - -150.06 (m).

HRMS (ESI) Calcd. for [M+H] C<sub>19</sub>H<sub>20</sub>ON 296.1445; found: 296.1452.

HPLC (ChiralPak IC column) 92:08(hexane:*i*PrOH) 1mL/min; T<sub>major</sub> (18.224 min), T<sub>minor</sub> (19.572 min)

### 6a

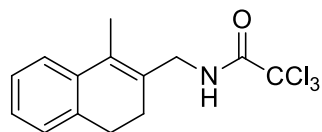

<sup>1</sup>H-NMR (500MHz, CDCl<sub>3</sub>)  $\delta$  (ppm) 7.34-7.24 (m, 2H), 7.21-7.15 (m, 2H), 6.67 (brs, 1H), 4.27 (d,  $J$  = 5.5 Hz, 2H), 2.79 (t,  $J$  = 7.5 Hz, 2H), 2.32 (t,  $J$  = 7.5 Hz, 2H), 2.17 (s, 3H). <sup>13</sup>C NMR (100 MHz, CDCl<sub>3</sub>)  $\delta$  (ppm) 162.1, 136.0, 135.7, 130.6, 129.7, 127.3, 127.1, 126.6, 123.5, 92.7, 43.8, 28.4, 26.8, 14.3.

Elemental analysis (CHN) est: 52.77% C, 4.43% H, 4.4% N; found: 52.49% C, 4.53% H, 4.51% N.

### 6b

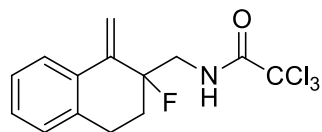

<sup>1</sup>H-NMR (400 MHz, CDCl<sub>3</sub>)  $\delta$  (ppm) 7.64 (d,  $J$  = 7.6 Hz, 1H), 7.30-7.24 (m, 2H), 7.19-7.17 (m, 1H), 7.03 (brs, 1H), 5.78 (d,  $J$  = 3.2 Hz, 1H), 5.52 (s, 1H), 4.01-3.89 (m, 1H), 3.56-3.47 (m, 1H), 3.10-3.02 (m, 2H), 2.28-2.16 (m, 2H). <sup>13</sup>C NMR (100 MHz, CDCl<sub>3</sub>)  $\delta$  (ppm) 162.2, 143.1 (d,  $J_{C-F}$  = 16.1 Hz), 134.5, 132.2 (d,  $J_{C-F}$  = 4.0 Hz), 128.9, 128.6, 126.8, 125.0 (d,  $J_{C-F}$  = 2.0 Hz), 109.6 ( $J_{C-F}$  = 16.1 Hz), 95.8 (d,  $J_{C-F}$  = 182 Hz), 92.5, 46.1 (d,  $J_{C-F}$  = 24.1 Hz), 30.4 (d,  $J_{C-F}$  = 21.1 Hz), 26.9 (d,  $J_{C-F}$  = 10.1 Hz). <sup>19</sup>F-NMR (376.5 MHz)  $\delta$  (ppm) -150.59 (m). Elemental analysis (CHN) est: 49.95% C, 3.89% H, 4.16% N; found: 48.96% C, 4.11% H, 3.81% N.

HPLC (ChiralPak IC column) 98:02 (hexane/*i*PrOH) 1mL/min; T<sub>major</sub> (9.50 min), T<sub>minor</sub> (10.90 min).

### 7a

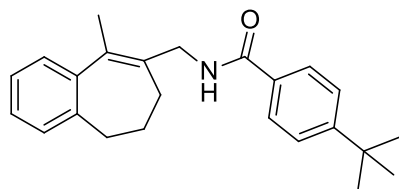

<sup>1</sup>H-NMR (500 MHz, CDCl<sub>3</sub>) δ (ppm) 7.73 (d, *J* = 8.2 Hz, 2H), 7.46 (d, *J* = 8.2 Hz, 2H), 7.28-7.24 (m, 2H, overlaps CDCl<sub>3</sub>) 7.17 (d, *J* = 2.4 Hz, 2H), 6.11 (s, 1H), 4.33 (d, *J* = 5.3 Hz, 2H), 2.55 (t, *J* = 7.1 Hz, 2H), 2.17 (s, 3H), 2.13 – 2.02 (m, 2H), 1.93 – 1.86 (m, 2H), 1.34 (s, 9H). <sup>13</sup>C NMR (125 MHz, CDCl<sub>3</sub>) δ (ppm) 167, 155.0, 143.2, 140.0, 133.5, 132.6, 131.8, 128.5, 126.7, 126.7, 126.5, 126.1, 125.6, 42.2, 35.0, 34.6, 32.1, 31.2, 28.6, 18.3. HRMS (ESI) Calcd. for [M+H] C<sub>24</sub>H<sub>30</sub>ON: 348.2322; found: 348.2330.

**7b**

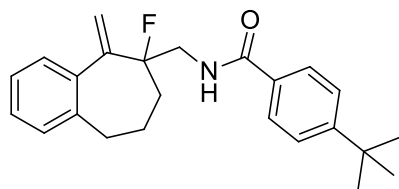

<sup>1</sup>H-NMR (400 MHz, CDCl<sub>3</sub>) δ (ppm) 7.93 (d, *J* = 8.0 Hz, 2H), 7.70 (d, *J* = 8.0 Hz, 2H), 7.22-7.09 (m, 4H), 6.29 (brs, 1H), 5.64 (s, 1H), 5.22-5.21 (m, 1H), 3.81-3.70 (m, 1H), 3.58-3.45 (m, 1H), 2.82-2.76 (m, 2H), 2.22-1.63 (overlapping multiplets, 4H), 1.35 (s, 9H). <sup>13</sup>C NMR (125 MHz, CDCl<sub>3</sub>) δ (ppm) 167.1, 155.1, 151.3 (d, *J*<sub>C-F</sub> = 19.5 Hz), 151.2, 139.5, 138.8 (d, *J*<sub>C-F</sub> = 5.1 Hz), 131.6, 129.3, 128.9, 128.3, 128.0, 126.8, 126.7, 125.6, 125.3, 114.7 (d, *J*<sub>C-F</sub> = 12.1 Hz), 98.2 (d, *J*<sub>C-F</sub> = 178 Hz), 97.30, 45.0 (d, *J*<sub>C-F</sub> = 20.4 Hz), 38.6 (d, *J*<sub>C-F</sub> = 23.6 Hz), 34.96, 31.19, 23.5 (d, *J*<sub>C-F</sub> = 11.2 Hz).

<sup>19</sup>F-NMR (376.5 MHz) δ (ppm) -147.2 (broad multiplet), -149.2 (m), -151.36-151.42 (m)

HRMS (ESI) Calcd. for [M+H] C<sub>24</sub>H<sub>29</sub>ONF: 366.2228; found: 366.2229.

HPLC (ChiralPak IB column) 95:05 (hexane: *i*PrOH) 1mL/min; T<sub>major</sub> (9.540 min), T<sub>minor</sub> (8.808 min).

**8a**

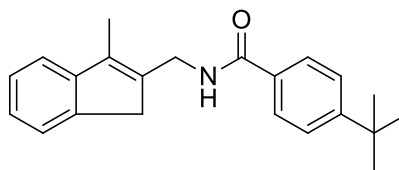

<sup>1</sup>H-NMR (300 MHz, CDCl<sub>3</sub>) δ (ppm) 7.72-7.69 (m, 2H), 7.45-7.38 (m, 3H), 7.31-7.30 (m, 2H), 7.20-7.18 (m, 1H), 4.51 (d, *J* = 5.4 Hz, 2H), 3.42 (s, 2H), 2.17 (s, 3H), 1.32 (s, 9H). <sup>13</sup>C NMR (125 MHz, CDCl<sub>3</sub>) δ (ppm) 167.3, 155.0, 146.4, 142.5, 137.3, 136.2, 131.5, 126.7, 126.3, 125.5, 124.8, 123.4, 118.9, 39.6, 37.5, 34.9, 31.1, 10.4.

HRMS (ESI) Calcd. For C<sub>22</sub>H<sub>26</sub>ON: 320.201; found: 320.2015.

**8b**

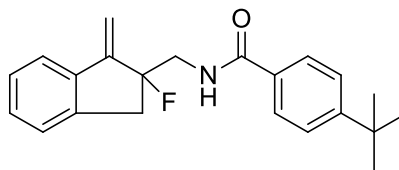

<sup>1</sup>H-NMR (400 MHz, CDCl<sub>3</sub>) δ (ppm) 7.71 (d, *J* = 8.0 Hz, 2H), 7.53-7.46 (m, 3H), 7.27-7.24 (3H), 6.48 (brs, 1H), 5.78 (d, *J* = 4.0 Hz, 1H), 5.44 (s, 1H), 4.16-

4.04 (m, 1H), 3.79-3.72 (m, 1H), 3.42-3.21 (m, 2H), 1.35 (s, 9H).  $^{13}\text{C}$  NMR (125 MHz,  $\text{CDCl}_3$ )  $\delta$  (ppm) 167.6, 155.3, 149.1 (d,  $J_{\text{C-F}} = 17.1$  Hz), 140.7 (d,  $J_{\text{C-F}} = 3.0$  Hz), 137.9 (d,  $J_{\text{C-F}} = 3.0$  Hz), 131.3, 129.7, 127.4, 126.9, 125.6, 125.5, 121.1, 107.6 (d,  $J_{\text{C-F}} = 6.0$  Hz), 101.7 (d,  $J_{\text{C-F}} = 182$  Hz), 45.9 (d,  $J_{\text{C-F}} = 28.2$  Hz), 40.7 (d,  $J_{\text{C-F}} = 14.1$  Hz), 35.0, 31.2.  $^{19}\text{F}$ -NMR (376.4 MHz)  $\delta$  (ppm) -144.78 - -144.81 (m).

HRMS (ESI) Calcd. for  $\text{C}_{22}\text{H}_{25}\text{ONF}$ : 338.1915; found: 352.1923.

HPLC (ChiralPak IC column) (90:10 hexane:*i*PrOH) 1mL/min;  $T_{\text{major}}$  (22.436 min),  $T_{\text{minor}}$  (20.620 min).

### 9a

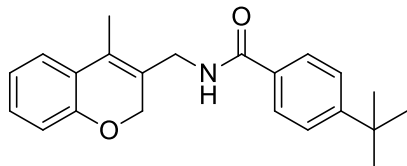

$^1\text{H}$ -NMR (400 MHz,  $\text{CDCl}_3$ )  $\delta$  (ppm) 7.72 (d, 8.4Hz, 2H), 7.45 (d, 8.4Hz, 2H), 7.27-7.13 (m, 2H), 6.97-6.93 (m, 1H), 6.83 (d, 7.6Hz, 1H), 6.18 (s, 1H), 4.71 (s, 2H), 4.25 (d, 5.6Hz, 2H), 2.11 (s, 3H), 1.33 (s, 9H).  $^{13}\text{C}$  NMR (125 MHz,  $\text{CDCl}_3$ )  $\delta$  (ppm) 167.8, 155.2, 153.8, 131.2, 128.9, 127.4, 126.9, 125.6, 125.4, 124.7, 123.9, 121.4, 115.8, 67.0, 38.7, 35.0, 31.2, 12.9.

HRMS (ESI) Calcd. for  $[\text{M}+\text{H}] \text{C}_{22}\text{H}_{26}\text{O}_2\text{N}$ : 336.1958; found: 336.1963.

### 9b

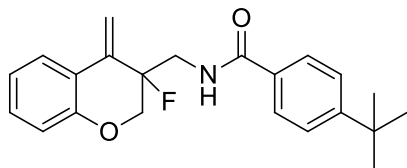

$^1\text{H}$ -NMR (400 MHz,  $\text{CDCl}_3$ )  $\delta$  (ppm) 7.75 (d,  $J = 8.4$  Hz, 2H), 7.62-7.60 (m, 1H), 7.50 (d,  $J = 8.4$  Hz, 2H), 7.30-7.25 (m, 1H), 7.04-6.96 (m, 2H), 6.43 (brs, 1H), 5.811 (s, 1H), 5.50 (s, 1H), 4.37-4.33 (m, 1H), 4.24-4.12 (m, 2H), 3.82-3.72 (m, 1H), 1.38 (s, 9H).  $^{13}\text{C}$  NMR (125 MHz,  $\text{CDCl}_3$ )  $\delta$  (ppm) 167.4, 155.3, 152.9, 138.5 (d,  $J_{\text{C-F}} = 17.1$  Hz), 131.2, 130.2, 126.9, 125.6, 124.7, 122.0, 119.3, 117.6, 107.3 (d,  $J_{\text{C-F}} = 10.1$  Hz), 90.8 (d,  $J_{\text{C-F}} = 183$  Hz), 68.0 (d,  $J_{\text{C-F}} = 30.2$  Hz), 43.3 (d,  $J_{\text{C-F}} = 24.1$  Hz), 35.0, 31.2.  $^{19}\text{F}$ -NMR (376.4 MHz)  $\delta$  (ppm) -166.28 - -166.40 (m).

HRMS (ESI) Calcd. for  $[\text{M}+\text{H}] \text{C}_{22}\text{H}_{25}\text{O}_2\text{NF}$ : 354.1864; found: 354.1874.

HPLC (ChiralPak IC column) 90:10 (hexane/*i*PrOH) 1mL/min;  $T_{\text{major}}$  (28.140 min),  $T_{\text{minor}}$  (31.536 min)

### 10a

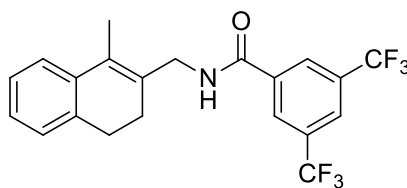

$^1\text{H}$ -NMR (400 MHz,  $\text{CDCl}_3$ )  $\delta$  (ppm) 8.24 (s, 2H), 8.032 (s, 1H), 7.66 -7.64 (m, 1H), 7.25-7.20 (m, 1H), 7.13-7.11 (m, 1H), 6.51 (brs, 1H), 4.56-4.55 (m, 2H), 2.86 (t,  $J = 8.0$  Hz, 2H), 2.57 (ts,  $J = 8.0$  Hz, 2H), 1.57 (s, 3H).

$^{13}\text{C}$  NMR (125 MHz,  $\text{CDCl}_3$ )  $\delta$  (ppm) 164.8, 136.5, 136.0, 135.7, 132.7, 132.4, 132.1, 131.8,

130.5, 130.2, 127.3, 127.0, 126.6, 125.1, 125.1, 125.0, 125.0, 124.0, 123.4, 121.8, 42.8, 28.4, 27.1, 14.4. HRMS (ESI) Calcd. For  $C_{21}H_{18}ONF_6$ : 414.1287, found: 414.1303.

### 10b

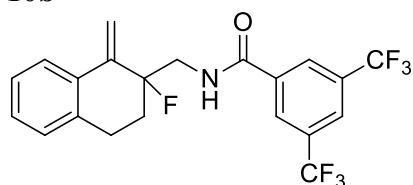

$^1H$ -NMR (400 MHz,  $CDCl_3$ )  $\delta$  (ppm) 8.23 (s, 2H), 8.04 (s, 1H), 7.63-7.61 (m, 1H), 7.26-7.15 (m, 4H), 6.58 (brs, 1H), 5.76 (s, 1H), 5.50 (s, 1H), 4.21-4.08 (m, 1H), 3.59-3.51 (m, 1H), 3.13-2.89 (m, 2H), 2.23-2.21 (m, 2H).  $^{13}C$  NMR (125 MHz,  $CDCl_3$ )  $\delta$  (ppm) 164.6, 143.6 (d,  $J_{C-F}$  = 16.3 Hz), 136.3, 134.6, 132.5, 132.3 (d,  $J_{C-F}$  = 17.6 Hz), 129.0, 128.6, 127.4, 126.7, 125.3, 124.9, 109.2 (d,  $J_{C-F}$  = 12.5 Hz), 96.7 (d,  $J_{C-F}$  = 179.8 Hz), 45.1 (d,  $J_{C-F}$  = 23.9 Hz), 30.5 (d,  $J_{C-F}$  = 21.4 Hz), 26.9 (d,  $J_{C-F}$  = 11.3 Hz).  $^{19}F$ -NMR (376.5 MHz)  $\delta$  (ppm) -62.1 (s), -150.0 (m).

HRMS (ESI) Calcd. for  $[M+H]^+$   $C_{21}H_{17}ONF_7$ : 432.119; found: 432.121.

HPLC (ChiralPak IB column) 99:01 (hexane/*i*PrOH) 1mL/min;  $T_{major}$  (21.40 min),  $T_{minor}$  (24.99min).

### 11a

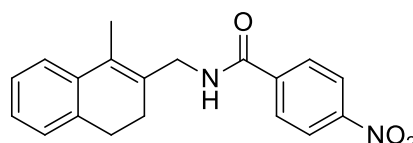

$^1H$ -NMR (500 MHz,  $CDCl_3$ )  $\delta$  (ppm) 8.33-8.29 (m, 2H), 8.00-7.94 (m, 2H), 7.34-7.28 (m, 1H), 7.26-7.14 (m, 3H), 6.23 (brs, 1H), 4.38-4.37 (m, 2H), 2.87 (t,  $J$  = 8.0 Hz, 2H), 2.38-2.35 (m, 2H), 2.19 (s, 3H).  $^{13}C$  NMR (100 MHz,  $CDCl_3$ )  $\delta$  (ppm) 165.7, 149.6, 140.1, 136.1, 135.7, 130.7, 130.0, 128.2, 127.3, 127.0, 126.6, 123.8, 123.4; 42.7, 28.4, 27.1, 14.3.

HRMS (ESI) Calcd. for  $[M+H]^+$   $C_{19}H_{19}O_3N_2$ : 323.139; found: 323.1402.

### 11b

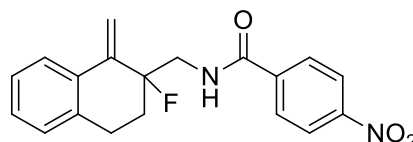

$^1H$ -NMR (400 MHz,  $CDCl_3$ )  $\delta$  (ppm) 8.32 (d,  $J$  = 8.8 Hz, 2H), 7.95 (d,  $J$  = 8.4 Hz, 2H), 7.62-7.60 (m, 1H), 7.25-7.15 (m, 4H), 6.50 (brs, 1H), 5.74 (m, 1H), 5.49 (s, 1H), 4.19-4.07 (m, 1H), 3.58-3.48 (m, 1H), 3.19-2.97 (m, 2H), 2.23-2.16 (m, 2H).  $^{13}C$  NMR (125 MHz,  $CDCl_3$ )  $\delta$  (ppm) 165.5, 149.7, 143.6 (d,  $J_{C-F}$  = 16.3 Hz), 139.8, 134.6, 132.3 (d,  $J_{C-F}$  = 16.3 Hz), 128.97-128.61, 128.2, 126.7, 124.9, 124.0, 109.2 (d,  $J_{C-F}$  = 11.3 Hz), 96.2 (d,  $J_{C-F}$  = 181.0 Hz), 45.0 (d,  $J_{C-F}$  = 23.9 Hz), 30.6 (d,  $J_{C-F}$  = 21.4 Hz), 27.0 (d,  $J_{C-F}$  = 10.1 Hz).  $^{19}F$ -NMR (376.5 MHz)  $\delta$  (ppm) -150.31 (m).

HRMS (ESI) Calcd. for  $[M+H]^+$   $C_{19}H_{18}O_3N_2F$ : 341.1296; found: 341.1307.

HPLC (ChiralPak IA column) 90:10 (hexane/*i*PrOH) 1mL/min;  $T_{major}$  (15.868 min),  $T_{minor}$  (18.700 min).

**12a**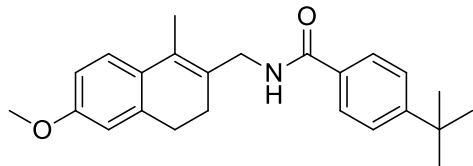

$^1\text{H-NMR}$  (400 MHz,  $\text{CDCl}_3$ )  $\delta$  (ppm) 7.74 (d,  $J = 8$  Hz, 2H), 7.44-7.42 (m, 2H), 7.27-7.21 (m, 1H), 6.75-6.70 (m, 2H), 6.33 (brs, 1H), 4.41-4.29 (m, 2H), 3.93 (s, 3H), 2.74-2.7 (t,  $J = 8$  Hz, 2H), 2.33-2.31 (m, 2H), 2.12 (s, 3H), 1.33 (s, 9H).  $^{13}\text{C NMR}$  (125 MHz,  $\text{CDCl}_3$ )  $\delta$  (ppm) 167.6, 158.3, 154.8, 137.6, 131.7, 129.4, 129.3, 128.8, 126.8, 125.4, 124.5, 113.3, 111.0, 55.2, 42.2, 34.9, 31.1, 28.9, 26.8, 14.2.  
HRMS (ESI) Calcd. For  $\text{C}_{24}\text{H}_{30}\text{O}_2\text{N}$ : 364.227, found: 364.228.

**12b**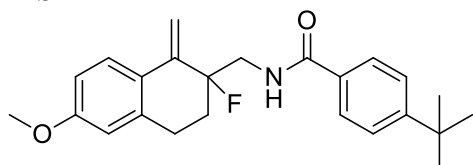

$^1\text{H-NMR}$  (400 MHz,  $\text{CDCl}_3$ )  $\delta$  (ppm) 7.77 (d,  $J = 8.4$  Hz, 2H), 7.58 (d,  $J = 8.8$  Hz, 1H), 7.52-7.50 (m, 2H), 6.83-6.81 (m, 1H), 6.67 (s, 1H), 6.48-6.47 (m, 1H), 5.63-5.62 (m, 1H), 5.40 (s, 1H), 4.27-4.14 (m, 1H), 3.84 (s, 3H), 3.50-3.41 (m, 1H), 3.21-3.14 (m, 1H), 2.96-2.92 (m, 1H), 2.27-2.13 (m, 2H), 1.39 (s, 9H).  $^{13}\text{C NMR}$  (125 MHz,  $\text{CDCl}_3$ )  $\delta$  (ppm) 167.4, 159.7, 155.3, 143.5, 136.4, 131.4, 126.8, 126.3, 125.6, 125.4, 113.6, 112.7, 106.7 (d,  $J_{\text{C-F}} = 12.5$  Hz), 55.3, 44.7 (d,  $J_{\text{C-F}} = 23.9$  Hz), 35.0, 31.2, 30.2 (d,  $J_{\text{C-F}} = 21.4$  Hz), 27.3 (d,  $J_{\text{C-F}} = 11.3$  Hz).  $^{19}\text{F-NMR}$  (376.5 MHz)  $\delta$  (ppm) -150.3 (m).  
HRMS (ESI) Calcd. for  $[\text{M}+\text{H}] \text{C}_{24}\text{H}_{29}\text{O}_2\text{NF}$ : 383.2177; found: 382.2187.  
HPLC (ChiralPak IC column) 96:04 (hexane/*i*PrOH) 1mL/min;  $T_{\text{major}}$  (60.28 min),  $T_{\text{minor}}$  (64.92 min).

**13a**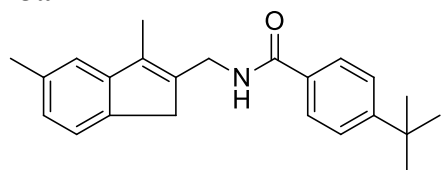

$^1\text{H-NMR}$  (400 MHz,  $\text{CDCl}_3$ )  $\delta$  (ppm) 7.72 (d,  $J = 8.4$  Hz, 2H), 7.44 (d,  $J = 8.4$  Hz, 2H), 7.27 (s, 1H), 7.13 (s, 1H), 7.02-7.01 (m, 1H), 6.26 (brs, 1H), 4.51 (d,  $J = 5.6$  Hz, 2H), 3.38 (s, 2H), 2.42 (s, 3H), 2.15 (s, 3H), 1.33 (s, 9H).  $^{13}\text{C NMR}$  (125 MHz,  $\text{CDCl}_3$ )  $\delta$  (ppm) 167.3, 155.0, 146.6, 139.5, 137.5, 136.2, 135.9, 131.5, 126.7, 125.6, 125.5, 123.1, 119.7, 39.18, 37.6, 34.9, 31.1, 21.5, 10.4.  
HRMS (ESI) Calcd. For  $\text{C}_{23}\text{H}_{28}\text{ON}$ : 334.2165, found: 334.2176.

**13b**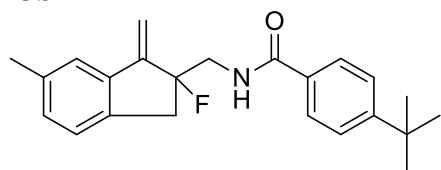

$^1\text{H-NMR}$  (400 MHz,  $\text{CDCl}_3$ )  $\delta$  (ppm) 7.72 (d,  $J = 8.0$  Hz, 2H),

7.47 ( $J = 8.0$  Hz, 2H), 7.33 (s, 1H), 7.11 (s, 2H), 5.75 (d,  $J = 4$  Hz, 1H), 5.40 (d,  $J = 4$  Hz, 1H), 4.14-4.02 (m, 1H), 3.77-3.7- (m, 1H), 3.36-3.16 (m, 2H), 2.37 (s, 3H), 1.35 (s, 9H).  $^{13}\text{C}$  NMR (125 MHz,  $\text{CDCl}_3$ )  $\delta$  (ppm) 167.5, 155.2, 149.1 (d,  $J_{\text{C-F}} = 17.1$  Hz), 137.8 (d,  $J_{\text{C-F}} = 13.9$  Hz), 137.1, 131.3, 130.7, 126.8, 125.6, 125.1, 121.5, 107.2 (d,  $J_{\text{C-F}} = 5.5$  Hz), 102.9, 45.9 (d,  $J_{\text{C-F}} = 27.8$  Hz), 40.3 (d,  $J_{\text{C-F}} = 23.7$  Hz), 34.9, 31.1, 21.3.  $^{19}\text{F}$ -NMR (376.5 MHz)  $\delta$  (ppm) -144.83 - -145.01(m).

HRMS (ESI) Calcd. for  $[\text{M}+\text{H}] \text{C}_{23}\text{H}_{27}\text{ONF}$ :352.2071; found: 352.2084.

HPLC (ChiralPak IC column) 96:04 (hexane/*i*PrOH) 1mL/min;  $T_{\text{major}}$  (33.86 min),  $T_{\text{minor}}$  ( 37.06 min).

#### 14a

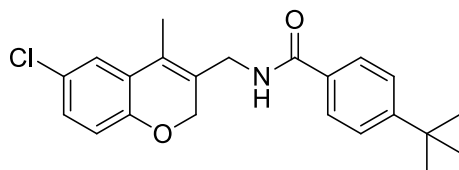

$^1\text{H}$ -NMR (300 MHz,  $\text{CDCl}_3$ )  $\delta$  (ppm) 7.70 (d,  $J = 6.0$  Hz, 2H), 7.43 (d,  $J = 8.1$  Hz), 7.14 (s, 1H), 7.08-7.05 (m, 1H), 6.75-6.72 (m, 1H), 6.21 (brs, 1H), 4.68 (s, 2H), 4.23 (d,  $J = 5.7$  Hz), 2H), 2.06 (s, 3H), 1.32 (s, 9H).  $^{13}\text{C}$  NMR (75 MHz,  $\text{CDCl}_3$ )  $\delta$  (ppm) 168.0, 155.6, 152.6, 131.3, 128.7, 127.1, 127.0, 126.8, 126.5, 126.4, 125.9, 124.1, 117.3, 67.4, 38.9, 35.2, 31.4, 13.1.

HRMS (ESI) Calcd. For  $[\text{M}+\text{H}]\text{C}_{22}\text{H}_{24}\text{O}_2\text{NCl}$ : 370.1587; found: 370.1580.

#### 14b

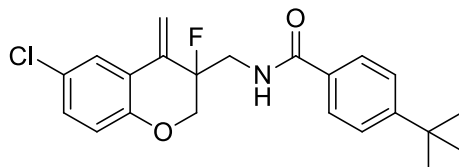

$^1\text{H}$ -NMR (300 MHz,  $\text{CDCl}_3$ )  $\delta$  (ppm) 7.71 (d,  $J = 9\text{Hz}$ , 2H), 7.51-7.44 (m, 3H), 7.18-7.14 (m, 1H), 6.38 (brs, 1H), 5.75 (s, 1H), 5.48 (s, 1H), 4.31-25 (m, 1H), 4.19-4.03 (m, 2H), 3.77-3.64 (m, 1H), 1.33 (s, 9H).  $^{13}\text{C}$  NMR (125 MHz,  $\text{CDCl}_3$ )  $\delta$  (ppm) 167.38, 155.45, 151.53, 137.5 (d,  $J_{\text{C-F}} = 17.4$  Hz), 131.1, 130.1, 127.1 (d,  $J_{\text{C-F}} = 30.1$  Hz), 125.6, 124.3, 120.8, 119.1, 108.7 (d,  $J_{\text{C-F}} = 9.6$  Hz), 91.0 (d,  $J_{\text{C-F}} = 183.3\text{Hz}$ ), 68.0 (d,  $J_{\text{C-F}} = 31.1$  Hz), 43.1 (d,  $J_{\text{C-F}} = 23.3$  Hz), 35.0, 31.2.  $^{19}\text{F}$ -NMR (376.5 MHz)  $\delta$  (ppm) -166.27 - -166.39 (m).

HRMS (ESI) Calcd. for  $[\text{M}+\text{H}] \text{C}_{22}\text{H}_{24}\text{O}_2\text{NCIF}$ : 388.1493; found: 388.1488.

HPLC (ChiralPak IC column) 90:10 (hexane/*i*PrOH) 1mL/min;  $T_{\text{major}}$  (20.832 min),  $T_{\text{minor}}$  (23.336 min).

#### 15a

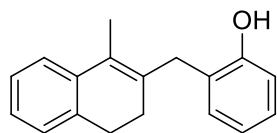

$^1\text{H}$ -NMR (400 MHz,  $\text{CDCl}_3$ )  $\delta$  (ppm) 7.41-7.40 (m, 1H), 7.32-7.29 (m, 1H), 7.27-7.15 (m, 4H), 6.95-6.93 (m, 1H), 6.88-6.83 (m, 1H), 5.31 (s, 1H), 3.73 (s, 2H), 2.81 (t,  $J = 7.6$  Hz, 2H), 2.26-2.23 (t and s overlap, 5H).  $^{13}\text{C}$  NMR (100 MHz,  $\text{CDCl}_3$ )  $\delta$  (ppm) 154.4, 136.7, 135.8, 133.8, 130.2, 127.9, 127.6, 127.2, 126.5, 126.3, 125.6, 123.1, 120.9, 116.0, 115.5, 34.4, 28.6, 28.1, 14.5.

HRMS (ESI) Calcd. for  $[\text{M}] \text{C}_{18}\text{H}_{18}\text{O}$ : 250.1352; found: 250.1351.

**15b**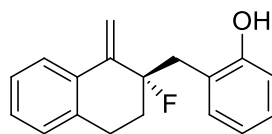

$^1\text{H-NMR}$  (400 MHz,  $\text{CDCl}_3$ )  $\delta$  (ppm) 7.63-7.61 (m, 1H), 7.29-7.13 (m, 4H), 6.97-6.94 (m, 2H), 6.87-6.84 (m, 1H), 5.93 (d,  $J = 21$  Hz, 1H), 5.62 (d,  $J = 4.0$  Hz, 1H), 5.35 (s, 1H), 3.23-2.99 (m, 4H), 2.22-2.11 (m, 2H).  $^{13}\text{C NMR}$  (100 MHz,  $\text{CDCl}_3$ )  $\delta$  (ppm) 155.0, 144.9, 144.8, 134.5, 133.1, 133.1, 132.6, 128.8, 128.77, 128.3, 125.13, 125.11, 121.9, 120.6, 117.0, 108.9 (d,  $J_{\text{C-F}} = 12.6$  Hz), 100.2, 98.9 (d,  $J_{\text{C-F}} = 176.0$  Hz), 38.9 (d,  $J_{\text{C-F}} = 23.9$  Hz), 32.1 (d,  $J_{\text{C-F}} = 22.6$  Hz), 27.0 (d,  $J_{\text{C-F}} = 11.3$  Hz).  $^{19}\text{F-NMR}$  (376.5 MHz)  $\delta$  (ppm) -137.1 - -137.3 (m). HRMS (ESI) Calcd. for [M]  $\text{C}_{18}\text{H}_{16}\text{OF}$ : 267.1191; found: 267.1192. HPLC (ChiralPak IC column) 98:02 (hexane/*i*PrOH) 1mL/min;  $T_{\text{major}}$  (7.72 min),  $T_{\text{minor}}$  (8.80 min).

**16a**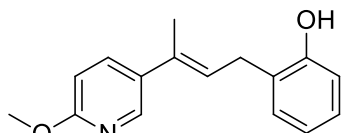

$^1\text{H-NMR}$  (500 MHz,  $\text{CDCl}_3$ )  $\delta$  (ppm) 8.22 (s, 1H), 7.66 (d,  $J = 2.5$  Hz, 1H), 7.19-7.11 (m, 2H), 6.90-6.81 (m, 2H), 6.71 (d,  $J = 8.5$  Hz, 1H), 5.93 (t,  $J = 3.5$  Hz, 1H), 5.60 (s, 1H), 3.93 (s, 3H), 3.57 (d,  $J = 7.5$  Hz, 2H), 2.13 (s, 3H).  $^{13}\text{C NMR}$  (100 MHz,  $\text{CDCl}_3$ )  $\delta$  (ppm) 163.1, 153.9, 143.6, 135.3, 133.0, 132.2, 130.0, 127.5, 126.7, 125.4, 120.8, 115.4, 110.1, 53.5, 29.6, 15.7. HRMS (ESI) Calcd. for [M+H]  $\text{C}_{16}\text{H}_{18}\text{O}_2\text{N}$ : 256.1332; found: 256.1325.

**16b**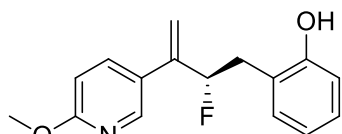

$^1\text{H-NMR}$  (400 MHz,  $\text{CDCl}_3$ )  $\delta$  (ppm) 8.26 (s, 1H), 7.70 (d,  $J = 8.4$  Hz, 1H), 7.14-7.04 (m, 2H), 6.87-6.75 (m, 3H), 5.79 (s, 1H), 5.73-5.58 (m, 1H), 5.40 (s, 2H), 3.96 (s, 3H), 3.16-2.84 (m, 2H).  $^{13}\text{C NMR}$  (100 MHz,  $\text{CDCl}_3$ )  $\delta$  (ppm) 163.8, 154.1, 144.8, 143.6 (d,  $J_{\text{C-F}} = 18.1$  Hz), 137.4, 131.7, 128.3, 127.2, 123.2, 120.7, 115.6, 114.7 (d,  $J_{\text{C-F}} = 10.1$  Hz), 110.6, 94.1 (d,  $J_{\text{C-F}} = 174.0$  Hz), 53.6, 36.3 (d,  $J_{\text{C-F}} = 23.1$  Hz).  $^{19}\text{F-NMR}$  (376.5 MHz)  $\delta$  (ppm) -174.3 - -174.6 (m). HRMS (ESI) Calcd. for [M+H]  $\text{C}_{16}\text{H}_{17}\text{O}_2\text{NF}$ : 274.1230; found: 274.1238. HPLC (ChiralPak IC) 98:02 (hexane/*i*PrOH) 1mL/min;  $T_{\text{major}}$  (9.228 min),  $T_{\text{minor}}$  (10.452 min)

**17a**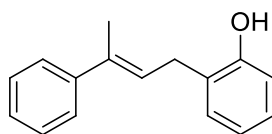

$^1\text{H-NMR}$  (400 MHz,  $\text{CDCl}_3$ )  $\delta$  (ppm) 7.43-7.10 (m, 7H), 6.90 (t,  $J = 9.8$  Hz, 1H), 6.80 (d,  $J = 10.4$  Hz, 1H), 5.96 (t,  $J = 8.4$  Hz, 1H), 3.57 (d,  $J = 9.6$  Hz, 2H), 2.19 (s, 3H);  $^{13}\text{C NMR}$  (100 MHz,  $\text{CDCl}_3$ )  $\delta$  (ppm) 154.0, 143.4, 136.9, 130.1, 128.3, 127.6, 127.0, 126.8, 125.8, 125.5, 121.0, 115.6, 29.9, 16.1.



HRMS (EI) Calcd. for [M] C<sub>16</sub>H<sub>16</sub>O: 224.1201; found: 224.1204.

**17b**

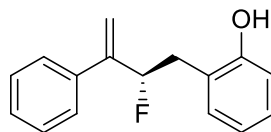

<sup>1</sup>H-NMR (400 MHz, CDCl<sub>3</sub>) δ (ppm) 7.45-7.35 (m, 5H), 7.15 (t, *J* = 7.8 Hz, 1H), 7.03 (d, *J* = 7.2 Hz, 1H), 6.89-6.82 (m, 2H), 5.77-5.66 (m, 1H), 5.44 (d, *J* = 12 Hz, 2H), 5.21 (d, *J* = 8 Hz, 1H), 3.15-2.93 (m, 2H). <sup>13</sup>C NMR (100 MHz, CDCl<sub>3</sub>) δ (ppm) 154.1, 146.6 (d, *J*<sub>C-F</sub> = 17.1 Hz), 138.2, 131.7, 128.5, 128.3, 128.1, 126.8, 123.4, 120.8, 115.9, 114.6 (d, *J*<sub>C-F</sub> = 11.1 Hz), 94.7 (d, *J*<sub>C-F</sub> = 173.0 Hz), 36.3 (d, *J*<sub>C-F</sub> = 23.1 Hz), 29.7. <sup>19</sup>F-NMR (376.5 MHz) δ (ppm) -173.9 - -174.2 (m).

HRMS (EI) Calcd. for [M] C<sub>16</sub>H<sub>15</sub>OF: 242.1107; found: 242.1110.

HPLC (ChiralPak IC) 94:06 (hexane/*i*PrOH) 1mL/min; T<sub>major</sub> (4.384 min), T<sub>minor</sub> (4.612 min).

**18a**

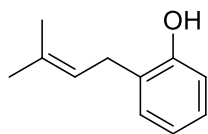

<sup>1</sup>H-NMR (500 MHz, CDCl<sub>3</sub>) δ (ppm) 7.15-7.12 (m, 2H), 6.84-6.82 (m, 1H), 6.76 (d, *J* = 8 Hz, 1H), 5.37-5.34 (m, 1H), 5.16 (s, 1H), 3.39 (d, *J* = 7 Hz, 2H), 1.81-1.80 (m, 6H). <sup>13</sup>C NMR (100 MHz, CDCl<sub>3</sub>) δ (ppm) 154.2, 134.5, 130.1, 127.6, 127.3, 122.1, 120.9, 115.8, 29.6, 25.9, 17.9.

HRMS (EI) Calcd. for [M] C<sub>11</sub>H<sub>14</sub>O: 162.1045; found: 162.1048.

**18b**

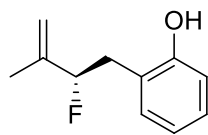

<sup>1</sup>H-NMR (400 MHz, CDCl<sub>3</sub>) δ (ppm) 7.17-7.13 (m, 2H), 6.91-6.82 (m, 2H), 5.32 (d, *J* = 8.4 Hz, 1H), 5.2 (m, 1H), 4.99 (d, *J* = 21.6 Hz, 2H), 3.09-2.96 (m, 2H), 2.19 (s, 1H), 1.83 (s, 3H). <sup>13</sup>C NMR (100 MHz, CDCl<sub>3</sub>) δ (ppm) 154.1, 142.7 (d, *J*<sub>C-F</sub> = 17.1 Hz), 131.5, 128.3, 123.6, 120.9, 116.0, 113.1 (d, *J*<sub>C-F</sub> = 10.1 Hz), 96.6 (d, *J*<sub>C-F</sub> = 170.0 Hz), 35.5 (d, *J*<sub>C-F</sub> = 23.1 Hz), 17.5 (d, *J*<sub>C-F</sub> = 3.0 Hz). <sup>19</sup>F-NMR (376.5 MHz) δ (ppm) -173.2 - -173.5 (m).

HRMS (EI) Calcd. for [M] C<sub>11</sub>H<sub>13</sub>OF: 180.0950; found: 180.0949.

HPLC (ChiralPak IC) 99:01 (hexane/*i*PrOH) 1mL/min; T<sub>major</sub> (19.892 min), T<sub>minor</sub> (24.844 min).

**19a**

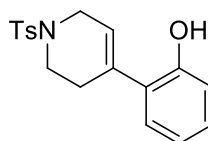

<sup>1</sup>H-NMR (400 MHz, CDCl<sub>3</sub>) δ (ppm) 7.77 (d, *J* = 8.0 Hz, 2H), 7.39 (d, *J* = 8.4 Hz, 2H), 7.19 (t, *J* = 6.4 Hz, 1H), 7.04-7.02 (m, 1H), 6.93-6.89 (m, 2H), 5.83 (s, 1H), 5.19 (s, 1H), 3.82-3.81 (m, 2H), 3.40 (t, *J* = 5.6 Hz, 2H), 2.58 (s, 2H), 2.22 (s, 3H). <sup>13</sup>C NMR (100 MHz, CDCl<sub>3</sub>) δ (ppm) 152.2, 143.9, 134.0, 133.1, 129.8, 128.9, 128.3, 127.8, 122.5, 121.1, 120.6, 115.8, 115.5, 45.0, 43.2, 29.4, 21.6.

HRMS (ESI) Calcd. for [M-1] C<sub>18</sub>H<sub>18</sub>O<sub>3</sub>NS: 328.1013; found: 328.1009.

**19b**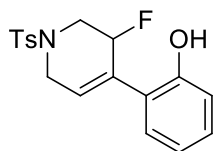

$^1\text{H-NMR}$  (400 MHz,  $\text{CDCl}_3$ )  $\delta$  (ppm) 7.77 (d,  $J = 8.0$  Hz, 2H), 7.40 (d,  $J = 8.4$  Hz, 2H), 7.26-7.21 (m, 1H), 7.11-7.09 (m, 1H), 6.95-6.88 (m, 2H), 6.15-6.14 (m, 1H), 5.46-5.34 (m/brs overlap, 2H), 4.16-4.08 (m, 1H), 3.99-3.92 (m, 1H), 3.66-3.53 (m, 1H), 3.31-3.21 (m, 1H), 2.49 (s, 3H).  $^{13}\text{C NMR}$  (100 MHz,  $\text{CDCl}_3$ )  $\delta$  (ppm) 153.1, 144.2, 133.2, 132.6 (d,  $J_{\text{C-F}} = 16.1$  Hz), 129.9, 129.8, 129.7, 129.6, 129.56, 127.8, 125.0, 120.8, 116.1, 85.4 (d,  $J_{\text{C-F}} = 172.0$  Hz), 65.9, 47.5 (d,  $J_{\text{C-F}} = 25.2$  Hz), 44.9, 21.6.

$^{19}\text{F-NMR}$  (376.5 MHz)  $\delta$  (ppm) -168.97 (m)

HRMS (ESI) Calcd. for  $[\text{M}-1]$   $\text{C}_{18}\text{H}_{17}\text{O}_3\text{NSF}$ : 346.0919; found: 346.0913.

HPLC (ChiralPak IA) 80:20 (hexane/*i*PrOH) 1mL/min;  $T_{\text{major}}$  (12.38 min),  $T_{\text{minor}}$  (14.87 min).

**20**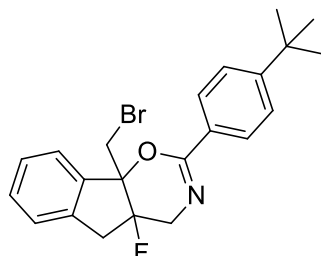

$^1\text{H-NMR}$  (400 MHz,  $\text{CDCl}_3$ )  $\delta$  (ppm) 8.02 (d,  $J = 8.4$  Hz, 2H), 7.63 (d,  $J = 8.0$  Hz, 1H), 7.47-7.45 (m, 2H), 7.41-7.32 (m, 2H), 7.29 (s, 1H), 4.12 (t,  $J = 16$  Hz, 1H), 4.00-3.83 (m, 2H), 3.60-3.46 (m, 2H), 3.28-3.22 (m, 1H), 1.34 (s, 9H).  $^{13}\text{C NMR}$  (100 MHz,  $\text{CDCl}_3$ )  $\delta$  (ppm) 156.4, 154.5, 141.1, 137.1, 137.06, 130.3, 129.7, 127.6, 127.3, 125.5, 125.4, 125.2, 94.49, 85.1 (d,  $J_{\text{C-F}} = 20.1$  Hz), 49.8 (d,  $J_{\text{C-F}} = 26.2$  Hz), 40.8 (d,  $J_{\text{C-F}} = 24.1$  Hz), 35.19, 35.0 (d,  $J_{\text{C-F}} = 11.0$  Hz), 31.1 (d,  $J_{\text{C-F}} = 19.1$  Hz).  $^{19}\text{F-NMR}$  (376.5 MHz)  $\delta$  (ppm) -168.45 - -168.53 (m).

HRMS (ESI) Calcd. for  $[\text{M}+\text{H}]$   $\text{C}_{22}\text{H}_{24}\text{ONFBr}$ : 416.1013; found: 416.1020.

HPLC (ChiralPak IB column) 99:01 (hexane/*i*PrOH) 1mL/min;  $T_{\text{major}}$  (11.26 min),  $T_{\text{minor}}$  (9.252 min).

**21**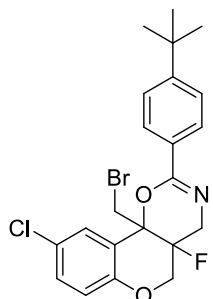

$^1\text{H-NMR}$  (400 MHz,  $\text{CDCl}_3$ )  $\delta$  (ppm) 8.02(d,  $J = 8.0$  Hz, 2H), 7.53-7.48 (m, 3H), 7.26-7.25 (m, 1H), 6.84 (d,  $J = 8.8$  Hz, 1H), 4.63-4.58 (m, 1H), 4.27-4.25 (m, 1H), 4.21-4.10 (m, 1H), 3.95-3.70 (m, 3H), 1.36 (s, 9H).  $^{13}\text{C NMR}$  (100 MHz,  $\text{CDCl}_3$ )  $\delta$  (ppm) 154.9, 153.0, 150.5, 131.2, 129.5, 127.5, 127.2, 126.7, 125.5, 123.4, 118.5, 85.1 (d,  $J_{\text{C-F}} = 187.1$  Hz),

66.4 (d,  $J_{C-F} = 33.2$  Hz), 48.7 (d,  $J_{C-F} = 25.6$  Hz), 36.0, 35.9, 35.1, 31.3.  $^{19}\text{F}$ -NMR (376.5 MHz)  $\delta$  (ppm) -175.20- -175.33 (m).

HRMS (ESI) Calcd. for  $[\text{M}+\text{H}] \text{C}_{22}\text{H}_{24}\text{O}_2\text{NFB rCl}$ : 466.0575; found: 466.0579.

HPLC (ChiralPak IC column) 98:02 (hexane/*i*PrOH) 1 mL/min;  $T_{\text{major}}$  (6.28 min),  $T_{\text{minor}}$  (5.66 min).

### X-ray crystallography data

#### 14b

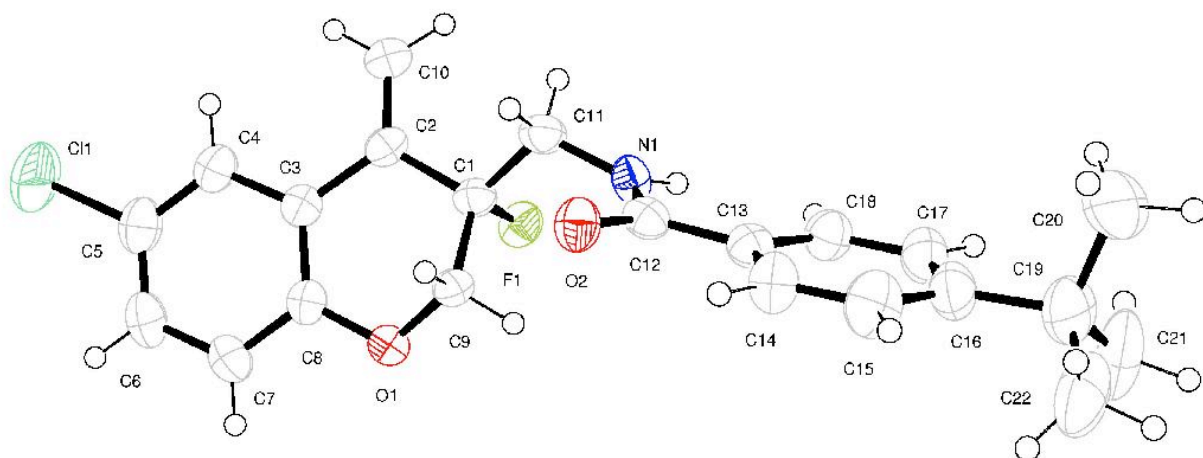

A colorless plate 0.10 x 0.06 x 0.03 mm in size was mounted on a Cryoloop with Paratone oil.

Data were collected in a nitrogen gas stream at 100(2) K using phi and omega scans. Crystal-to-detector distance was 60 mm and exposure time was 10 seconds per frame using a scan width of 1.0°. Data collection was 98.3% complete to 67.00° in  $\theta$ . A total of 22020 reflections were collected covering the indices,  $-8 \leq h \leq 9$ ,  $-14 \leq k \leq 14$ ,  $-23 \leq l \leq 23$ . 6821 reflections were found to be symmetry independent, with an  $R_{\text{int}}$  of 0.0431. Indexing and unit cell refinement indicated a primitive, monoclinic lattice. The space group was found to be P2(1) (No. 4). The data were integrated using the Bruker SAINT software program and scaled using the SADABS software program. Solution by direct methods (SIR-2008) produced a complete heavy-atom phasing model consistent with the proposed structure. All non-hydrogen atoms were refined anisotropically by full-matrix least-squares (SHELXL-97). All hydrogen atoms were placed using a riding model. Their positions were constrained relative to their parent atom using the appropriate HFIX command in SHELXL-97. Absolute stereochemistry was unambiguously determined to be *R* at C1 and C23, respectively.

Table 1. Crystal data and structure refinement for toste52.

|                                   |                                             |                             |
|-----------------------------------|---------------------------------------------|-----------------------------|
| X-ray ID                          | toste52                                     |                             |
| Sample/notebook ID                | JW-08-41                                    |                             |
| Empirical formula                 | C22 H23 Cl F N O2                           |                             |
| Formula weight                    | 387.86                                      |                             |
| Temperature                       | 100(2) K                                    |                             |
| Wavelength                        | 1.54178 Å                                   |                             |
| Crystal system                    | Monoclinic                                  |                             |
| Space group                       | P2(1)                                       |                             |
| Unit cell dimensions              | a = 8.4882(3) Å                             | $\alpha = 90^\circ$ .       |
|                                   | b = 11.8855(5) Å                            | $\beta = 96.216(3)^\circ$ . |
|                                   | c = 19.4286(8) Å                            | $\gamma = 90^\circ$ .       |
| Volume                            | 1948.56(13) Å <sup>3</sup>                  |                             |
| Z                                 | 4                                           |                             |
| Density (calculated)              | 1.322 Mg/m <sup>3</sup>                     |                             |
| Absorption coefficient            | 1.953 mm <sup>-1</sup>                      |                             |
| F(000)                            | 816                                         |                             |
| Crystal size                      | 0.10 x 0.06 x 0.03 mm <sup>3</sup>          |                             |
| Crystal color/habit               | colorless plate                             |                             |
| Theta range for data collection   | 4.37 to 67.86°.                             |                             |
| Index ranges                      | -8 ≤ h ≤ 9, -14 ≤ k ≤ 14, -23 ≤ l ≤ 23      |                             |
| Reflections collected             | 22020                                       |                             |
| Independent reflections           | 6821 [R(int) = 0.0431]                      |                             |
| Completeness to theta = 67.00°    | 98.3 %                                      |                             |
| Absorption correction             | Semi-empirical from equivalents             |                             |
| Max. and min. transmission        | 0.9437 and 0.8287                           |                             |
| Refinement method                 | Full-matrix least-squares on F <sup>2</sup> |                             |
| Data / restraints / parameters    | 6821 / 1 / 493                              |                             |
| Goodness-of-fit on F <sup>2</sup> | 1.044                                       |                             |
| Final R indices [I > 2σ(I)]       | R1 = 0.0730, wR2 = 0.1882                   |                             |
| R indices (all data)              | R1 = 0.0832, wR2 = 0.2001                   |                             |
| Absolute structure parameter      | -0.01(3)                                    |                             |
| Largest diff. peak and hole       | 0.798 and -0.438 e.Å <sup>-3</sup>          |                             |

Table 2. Atomic coordinates ( $\times 10^4$ ) and equivalent isotropic displacement parameters ( $\text{\AA}^2 \times 10^3$ ) for toste52.  $U(\text{eq})$  is defined as one third of the trace of the orthogonalized  $U^{ij}$  tensor.

|       | x        | y        | z       | $U(\text{eq})$ |
|-------|----------|----------|---------|----------------|
| C(1)  | 4214(5)  | 4439(3)  | 4535(2) | 37(1)          |
| C(2)  | 4829(5)  | 4120(4)  | 3852(2) | 38(1)          |
| C(3)  | 4754(5)  | 5039(4)  | 3328(2) | 39(1)          |
| C(4)  | 5340(6)  | 4891(5)  | 2687(3) | 51(1)          |
| C(5)  | 5186(7)  | 5740(6)  | 2204(3) | 62(1)          |
| C(6)  | 4413(7)  | 6725(5)  | 2311(3) | 56(1)          |
| C(7)  | 3870(6)  | 6904(4)  | 2953(2) | 47(1)          |
| C(8)  | 4050(5)  | 6071(4)  | 3456(2) | 40(1)          |
| C(9)  | 4262(5)  | 5694(3)  | 4652(2) | 35(1)          |
| C(10) | 5316(6)  | 3090(4)  | 3738(3) | 50(1)          |
| C(11) | 5087(6)  | 3825(4)  | 5147(2) | 43(1)          |
| C(12) | 5296(5)  | 4865(3)  | 6234(2) | 37(1)          |
| C(13) | 4874(5)  | 4903(4)  | 6955(2) | 40(1)          |
| C(14) | 5710(6)  | 5647(5)  | 7422(3) | 51(1)          |
| C(15) | 5458(7)  | 5665(6)  | 8101(3) | 63(1)          |
| C(16) | 4361(6)  | 4971(5)  | 8368(3) | 57(1)          |
| C(17) | 3520(6)  | 4244(5)  | 7900(3) | 54(1)          |
| C(18) | 3750(6)  | 4219(4)  | 7214(3) | 48(1)          |
| C(19) | 4109(9)  | 4941(7)  | 9146(3) | 80(2)          |
| C(20) | 5199(19) | 4005(11) | 9475(4) | 166(6)         |
| C(21) | 2355(11) | 4761(9)  | 9229(4) | 102(3)         |
| C(22) | 4550(10) | 6092(8)  | 9482(3) | 91(2)          |
| C(23) | -804(5)  | 6703(3)  | 4348(2) | 38(1)          |
| C(24) | -615(5)  | 6248(4)  | 3630(2) | 39(1)          |
| C(25) | -157(5)  | 7111(4)  | 3131(2) | 43(1)          |
| C(26) | -32(6)   | 6841(5)  | 2436(3) | 52(1)          |
| C(27) | 451(7)   | 7658(6)  | 1998(3) | 62(1)          |
| C(28) | 776(7)   | 8751(5)  | 2218(3) | 60(1)          |
| C(29) | 658(6)   | 9025(4)  | 2896(3) | 54(1)          |
| C(30) | 180(5)   | 8219(4)  | 3351(3) | 45(1)          |
| C(31) | 247(5)   | 7702(3)  | 4524(2) | 41(1)          |

|       |           |          |         |        |
|-------|-----------|----------|---------|--------|
| C(32) | -856(6)   | 5180(4)  | 3472(2) | 49(1)  |
| C(33) | -581(5)   | 5820(3)  | 4927(2) | 38(1)  |
| C(34) | 586(5)    | 6545(3)  | 6039(2) | 38(1)  |
| C(35) | 264(5)    | 7014(3)  | 6729(2) | 38(1)  |
| C(36) | -1125(5)  | 7571(4)  | 6829(2) | 40(1)  |
| C(37) | -1360(5)  | 7994(4)  | 7466(3) | 45(1)  |
| C(38) | -229(6)   | 7874(4)  | 8035(3) | 51(1)  |
| C(39) | 1176(6)   | 7332(4)  | 7931(2) | 49(1)  |
| C(40) | 1433(5)   | 6907(4)  | 7288(2) | 43(1)  |
| C(41) | -506(7)   | 8293(6)  | 8763(3) | 65(2)  |
| C(42) | -837(15)  | 7315(12) | 9203(4) | 141(5) |
| C(43) | -2152(13) | 8927(12) | 8735(5) | 134(5) |
| C(44) | 778(11)   | 8987(12) | 9071(5) | 131(4) |
| N(1)  | 4551(4)   | 4093(3)  | 5807(2) | 41(1)  |
| N(2)  | -712(4)   | 6278(3)  | 5599(2) | 39(1)  |
| O(1)  | 3480(3)   | 6295(2)  | 4071(2) | 38(1)  |
| O(2)  | 6346(3)   | 5460(3)  | 6043(2) | 45(1)  |
| O(3)  | 39(4)     | 8557(2)  | 4013(2) | 48(1)  |
| O(4)  | 1930(3)   | 6439(3)  | 5883(2) | 44(1)  |
| F(1)  | 2601(3)   | 4115(2)  | 4492(1) | 44(1)  |
| F(2)  | -2405(3)  | 7101(2)  | 4316(1) | 46(1)  |
| Cl(1) | 5951(3)   | 5539(2)  | 1412(1) | 94(1)  |
| Cl(2) | 678(3)    | 7284(2)  | 1137(1) | 92(1)  |

---

Table 3. Bond lengths [Å] and angles [°] for toste52.

|              |          |              |           |
|--------------|----------|--------------|-----------|
| C(1)-F(1)    | 1.416(5) | C(16)-C(17)  | 1.394(8)  |
| C(1)-C(9)    | 1.509(5) | C(16)-C(19)  | 1.550(8)  |
| C(1)-C(11)   | 1.519(6) | C(17)-C(18)  | 1.368(7)  |
| C(1)-C(2)    | 1.526(6) | C(17)-H(17)  | 0.9500    |
| C(2)-C(10)   | 1.318(6) | C(18)-H(18)  | 0.9500    |
| C(2)-C(3)    | 1.490(6) | C(19)-C(21)  | 1.529(11) |
| C(3)-C(8)    | 1.399(6) | C(19)-C(20)  | 1.541(11) |
| C(3)-C(4)    | 1.400(6) | C(19)-C(22)  | 1.545(12) |
| C(4)-C(5)    | 1.374(8) | C(20)-H(20A) | 0.9800    |
| C(4)-H(4)    | 0.9500   | C(20)-H(20B) | 0.9800    |
| C(5)-C(6)    | 1.369(8) | C(20)-H(20C) | 0.9800    |
| C(5)-Cl(1)   | 1.751(5) | C(21)-H(21A) | 0.9800    |
| C(6)-C(7)    | 1.394(7) | C(21)-H(21B) | 0.9800    |
| C(6)-H(6)    | 0.9500   | C(21)-H(21C) | 0.9800    |
| C(7)-C(8)    | 1.388(6) | C(22)-H(22A) | 0.9800    |
| C(7)-H(7)    | 0.9500   | C(22)-H(22B) | 0.9800    |
| C(8)-O(1)    | 1.364(5) | C(22)-H(22C) | 0.9800    |
| C(9)-O(1)    | 1.435(5) | C(23)-F(2)   | 1.434(5)  |
| C(9)-H(9A)   | 0.9900   | C(23)-C(31)  | 1.502(6)  |
| C(9)-H(9B)   | 0.9900   | C(23)-C(24)  | 1.521(6)  |
| C(10)-H(10A) | 0.9500   | C(23)-C(33)  | 1.535(6)  |
| C(10)-H(10B) | 0.9500   | C(24)-C(32)  | 1.317(7)  |
| C(11)-N(1)   | 1.441(6) | C(24)-C(25)  | 1.492(6)  |
| C(11)-H(11A) | 0.9900   | C(25)-C(26)  | 1.403(7)  |
| C(11)-H(11B) | 0.9900   | C(25)-C(30)  | 1.404(7)  |
| C(12)-O(2)   | 1.226(5) | C(26)-C(27)  | 1.383(8)  |
| C(12)-N(1)   | 1.347(6) | C(26)-H(26)  | 0.9500    |
| C(12)-C(13)  | 1.485(6) | C(27)-C(28)  | 1.385(9)  |
| C(13)-C(18)  | 1.389(7) | C(27)-Cl(2)  | 1.763(6)  |
| C(13)-C(14)  | 1.403(7) | C(28)-C(29)  | 1.370(8)  |
| C(14)-C(15)  | 1.358(8) | C(28)-H(28)  | 0.9500    |
| C(14)-H(14)  | 0.9500   | C(29)-C(30)  | 1.394(7)  |
| C(15)-C(16)  | 1.387(8) | C(29)-H(29)  | 0.9500    |
| C(15)-H(15)  | 0.9500   | C(30)-O(3)   | 1.364(6)  |



|                 |          |                   |           |
|-----------------|----------|-------------------|-----------|
| C(31)-O(3)      | 1.419(5) | C(38)-C(41)       | 1.541(7)  |
| C(31)-H(31A)    | 0.9900   | C(39)-C(40)       | 1.388(7)  |
| C(31)-H(31B)    | 0.9900   | C(39)-H(39)       | 0.9500    |
| C(32)-H(32A)    | 0.9500   | C(40)-H(40)       | 0.9500    |
| C(32)-H(32B)    | 0.9500   | C(41)-C(44)       | 1.444(11) |
| C(33)-N(2)      | 1.429(6) | C(41)-C(42)       | 1.487(13) |
| C(33)-H(33A)    | 0.9900   | C(41)-C(43)       | 1.583(11) |
| C(33)-H(33B)    | 0.9900   | C(42)-H(42A)      | 0.9800    |
| C(34)-O(4)      | 1.218(5) | C(42)-H(42B)      | 0.9800    |
| C(34)-N(2)      | 1.358(6) | C(42)-H(42C)      | 0.9800    |
| C(34)-C(35)     | 1.504(6) | C(43)-H(43A)      | 0.9800    |
| C(35)-C(36)     | 1.384(6) | C(43)-H(43B)      | 0.9800    |
| C(35)-C(40)     | 1.395(6) | C(43)-H(43C)      | 0.9800    |
| C(36)-C(37)     | 1.370(7) | C(44)-H(44A)      | 0.9800    |
| C(36)-H(36)     | 0.9500   | C(44)-H(44B)      | 0.9800    |
| C(37)-C(38)     | 1.391(7) | C(44)-H(44C)      | 0.9800    |
| C(37)-H(37)     | 0.9500   | N(1)-H(1)         | 0.8800    |
| C(38)-C(39)     | 1.390(7) | N(2)-H(2)         | 0.8800    |
| F(1)-C(1)-C(9)  | 106.7(3) | C(4)-C(5)-Cl(1)   | 118.9(5)  |
| F(1)-C(1)-C(11) | 107.6(3) | C(5)-C(6)-C(7)    | 118.5(5)  |
| C(9)-C(1)-C(11) | 110.7(3) | C(5)-C(6)-H(6)    | 120.8     |
| F(1)-C(1)-C(2)  | 107.5(3) | C(7)-C(6)-H(6)    | 120.8     |
| C(9)-C(1)-C(2)  | 111.8(4) | C(8)-C(7)-C(6)    | 119.9(5)  |
| C(11)-C(1)-C(2) | 112.2(3) | C(8)-C(7)-H(7)    | 120.0     |
| C(10)-C(2)-C(3) | 123.9(4) | C(6)-C(7)-H(7)    | 120.0     |
| C(10)-C(2)-C(1) | 121.3(4) | O(1)-C(8)-C(7)    | 117.1(4)  |
| C(3)-C(2)-C(1)  | 114.8(4) | O(1)-C(8)-C(3)    | 121.8(4)  |
| C(8)-C(3)-C(4)  | 117.9(4) | C(7)-C(8)-C(3)    | 121.2(4)  |
| C(8)-C(3)-C(2)  | 120.6(4) | O(1)-C(9)-C(1)    | 111.8(3)  |
| C(4)-C(3)-C(2)  | 121.5(4) | O(1)-C(9)-H(9A)   | 109.3     |
| C(5)-C(4)-C(3)  | 119.9(5) | C(1)-C(9)-H(9A)   | 109.3     |
| C(5)-C(4)-H(4)  | 120.1    | O(1)-C(9)-H(9B)   | 109.3     |
| C(3)-C(4)-H(4)  | 120.1    | C(1)-C(9)-H(9B)   | 109.3     |
| C(6)-C(5)-C(4)  | 122.4(5) | H(9A)-C(9)-H(9B)  | 107.9     |
| C(6)-C(5)-Cl(1) | 118.6(4) | C(2)-C(10)-H(10A) | 120.0     |

|                     |          |                     |          |
|---------------------|----------|---------------------|----------|
| C(2)-C(10)-H(10B)   | 120.0    | C(19)-C(20)-H(20B)  | 109.5    |
| H(10A)-C(10)-H(10B) | 120.0    | H(20A)-C(20)-H(20B) | 109.5    |
| N(1)-C(11)-C(1)     | 114.6(4) | C(19)-C(20)-H(20C)  | 109.5    |
| N(1)-C(11)-H(11A)   | 108.6    | H(20A)-C(20)-H(20C) | 109.5    |
| C(1)-C(11)-H(11A)   | 108.6    | H(20B)-C(20)-H(20C) | 109.5    |
| N(1)-C(11)-H(11B)   | 108.6    | C(19)-C(21)-H(21A)  | 109.5    |
| C(1)-C(11)-H(11B)   | 108.6    | C(19)-C(21)-H(21B)  | 109.5    |
| H(11A)-C(11)-H(11B) | 107.6    | H(21A)-C(21)-H(21B) | 109.5    |
| O(2)-C(12)-N(1)     | 120.9(4) | C(19)-C(21)-H(21C)  | 109.5    |
| O(2)-C(12)-C(13)    | 121.7(4) | H(21A)-C(21)-H(21C) | 109.5    |
| N(1)-C(12)-C(13)    | 117.2(4) | H(21B)-C(21)-H(21C) | 109.5    |
| C(18)-C(13)-C(14)   | 117.0(4) | C(19)-C(22)-H(22A)  | 109.5    |
| C(18)-C(13)-C(12)   | 124.7(4) | C(19)-C(22)-H(22B)  | 109.5    |
| C(14)-C(13)-C(12)   | 118.2(4) | H(22A)-C(22)-H(22B) | 109.5    |
| C(15)-C(14)-C(13)   | 121.1(5) | C(19)-C(22)-H(22C)  | 109.5    |
| C(15)-C(14)-H(14)   | 119.5    | H(22A)-C(22)-H(22C) | 109.5    |
| C(13)-C(14)-H(14)   | 119.5    | H(22B)-C(22)-H(22C) | 109.5    |
| C(14)-C(15)-C(16)   | 122.4(5) | F(2)-C(23)-C(31)    | 106.6(3) |
| C(14)-C(15)-H(15)   | 118.8    | F(2)-C(23)-C(24)    | 105.7(3) |
| C(16)-C(15)-H(15)   | 118.8    | C(31)-C(23)-C(24)   | 111.8(4) |
| C(15)-C(16)-C(17)   | 116.2(5) | F(2)-C(23)-C(33)    | 107.3(3) |
| C(15)-C(16)-C(19)   | 123.2(6) | C(31)-C(23)-C(33)   | 110.5(4) |
| C(17)-C(16)-C(19)   | 120.5(5) | C(24)-C(23)-C(33)   | 114.4(3) |
| C(18)-C(17)-C(16)   | 122.1(5) | C(32)-C(24)-C(25)   | 123.8(4) |
| C(18)-C(17)-H(17)   | 118.9    | C(32)-C(24)-C(23)   | 121.8(4) |
| C(16)-C(17)-H(17)   | 118.9    | C(25)-C(24)-C(23)   | 114.4(4) |
| C(17)-C(18)-C(13)   | 121.1(5) | C(26)-C(25)-C(30)   | 118.3(4) |
| C(17)-C(18)-H(18)   | 119.5    | C(26)-C(25)-C(24)   | 121.3(4) |
| C(13)-C(18)-H(18)   | 119.5    | C(30)-C(25)-C(24)   | 120.3(4) |
| C(21)-C(19)-C(20)   | 113.8(9) | C(27)-C(26)-C(25)   | 119.3(5) |
| C(21)-C(19)-C(22)   | 105.9(7) | C(27)-C(26)-H(26)   | 120.4    |
| C(20)-C(19)-C(22)   | 110.9(7) | C(25)-C(26)-H(26)   | 120.4    |
| C(21)-C(19)-C(16)   | 110.2(5) | C(26)-C(27)-C(28)   | 122.1(5) |
| C(20)-C(19)-C(16)   | 106.3(6) | C(26)-C(27)-Cl(2)   | 118.4(5) |
| C(22)-C(19)-C(16)   | 109.8(6) | C(28)-C(27)-Cl(2)   | 119.4(4) |
| C(19)-C(20)-H(20A)  | 109.5    | C(29)-C(28)-C(27)   | 119.1(5) |

|                     |          |                     |          |
|---------------------|----------|---------------------|----------|
| C(29)-C(28)-H(28)   | 120.5    | C(39)-C(38)-C(41)   | 120.2(5) |
| C(27)-C(28)-H(28)   | 120.5    | C(37)-C(38)-C(41)   | 122.4(5) |
| C(28)-C(29)-C(30)   | 120.2(5) | C(40)-C(39)-C(38)   | 121.4(4) |
| C(28)-C(29)-H(29)   | 119.9    | C(40)-C(39)-H(39)   | 119.3    |
| C(30)-C(29)-H(29)   | 119.9    | C(38)-C(39)-H(39)   | 119.3    |
| O(3)-C(30)-C(29)    | 117.2(4) | C(39)-C(40)-C(35)   | 120.0(4) |
| O(3)-C(30)-C(25)    | 121.9(4) | C(39)-C(40)-H(40)   | 120.0    |
| C(29)-C(30)-C(25)   | 120.9(5) | C(35)-C(40)-H(40)   | 120.0    |
| O(3)-C(31)-C(23)    | 112.4(4) | C(44)-C(41)-C(42)   | 112.9(8) |
| O(3)-C(31)-H(31A)   | 109.1    | C(44)-C(41)-C(38)   | 112.4(6) |
| C(23)-C(31)-H(31A)  | 109.1    | C(42)-C(41)-C(38)   | 109.4(6) |
| O(3)-C(31)-H(31B)   | 109.1    | C(44)-C(41)-C(43)   | 111.5(8) |
| C(23)-C(31)-H(31B)  | 109.1    | C(42)-C(41)-C(43)   | 99.8(8)  |
| H(31A)-C(31)-H(31B) | 107.9    | C(38)-C(41)-C(43)   | 110.2(5) |
| C(24)-C(32)-H(32A)  | 120.0    | C(41)-C(42)-H(42A)  | 109.5    |
| C(24)-C(32)-H(32B)  | 120.0    | C(41)-C(42)-H(42B)  | 109.5    |
| H(32A)-C(32)-H(32B) | 120.0    | H(42A)-C(42)-H(42B) | 109.5    |
| N(2)-C(33)-C(23)    | 113.1(3) | C(41)-C(42)-H(42C)  | 109.5    |
| N(2)-C(33)-H(33A)   | 109.0    | H(42A)-C(42)-H(42C) | 109.5    |
| C(23)-C(33)-H(33A)  | 109.0    | H(42B)-C(42)-H(42C) | 109.5    |
| N(2)-C(33)-H(33B)   | 109.0    | C(41)-C(43)-H(43A)  | 109.5    |
| C(23)-C(33)-H(33B)  | 109.0    | C(41)-C(43)-H(43B)  | 109.5    |
| H(33A)-C(33)-H(33B) | 107.8    | H(43A)-C(43)-H(43B) | 109.5    |
| O(4)-C(34)-N(2)     | 122.5(4) | C(41)-C(43)-H(43C)  | 109.5    |
| O(4)-C(34)-C(35)    | 121.7(4) | H(43A)-C(43)-H(43C) | 109.5    |
| N(2)-C(34)-C(35)    | 115.8(4) | H(43B)-C(43)-H(43C) | 109.5    |
| C(36)-C(35)-C(40)   | 118.7(4) | C(41)-C(44)-H(44A)  | 109.5    |
| C(36)-C(35)-C(34)   | 122.8(4) | C(41)-C(44)-H(44B)  | 109.5    |
| C(40)-C(35)-C(34)   | 118.5(4) | H(44A)-C(44)-H(44B) | 109.5    |
| C(37)-C(36)-C(35)   | 120.8(4) | C(41)-C(44)-H(44C)  | 109.5    |
| C(37)-C(36)-H(36)   | 119.6    | H(44A)-C(44)-H(44C) | 109.5    |
| C(35)-C(36)-H(36)   | 119.6    | H(44B)-C(44)-H(44C) | 109.5    |
| C(36)-C(37)-C(38)   | 121.7(4) | C(12)-N(1)-C(11)    | 121.7(4) |
| C(36)-C(37)-H(37)   | 119.2    | C(12)-N(1)-H(1)     | 119.1    |
| C(38)-C(37)-H(37)   | 119.2    | C(11)-N(1)-H(1)     | 119.1    |
| C(39)-C(38)-C(37)   | 117.4(4) | C(34)-N(2)-C(33)    | 121.8(3) |

|                  |          |
|------------------|----------|
| C(34)-N(2)-H(2)  | 119.1    |
| C(33)-N(2)-H(2)  | 119.1    |
| C(8)-O(1)-C(9)   | 114.5(3) |
| C(30)-O(3)-C(31) | 115.6(3) |

---

Symmetry transformations used to generate equivalent atoms:

Table 4. Anisotropic displacement parameters ( $\text{\AA}^2 \times 10^3$ ) for toste52. The anisotropic displacement factor exponent takes the form:  $-2\pi^2 [ h^2 a^{*2} U^{11} + \dots + 2 h k a^* b^* U^{12} ]$

|       | U <sup>11</sup> | U <sup>22</sup> | U <sup>33</sup> | U <sup>23</sup> | U <sup>13</sup> | U <sup>12</sup> |
|-------|-----------------|-----------------|-----------------|-----------------|-----------------|-----------------|
| C(1)  | 36(2)           | 32(2)           | 42(2)           | -3(2)           | 4(2)            | 0(2)            |
| C(2)  | 31(2)           | 42(2)           | 40(2)           | -4(2)           | 5(2)            | 3(2)            |
| C(3)  | 38(2)           | 42(2)           | 37(2)           | -1(2)           | 5(2)            | 0(2)            |
| C(4)  | 60(3)           | 56(3)           | 40(2)           | -2(2)           | 14(2)           | 6(2)            |
| C(5)  | 78(4)           | 75(4)           | 33(2)           | 2(2)            | 14(2)           | 3(3)            |
| C(6)  | 67(3)           | 63(3)           | 39(2)           | 11(2)           | 7(2)            | -6(2)           |
| C(7)  | 51(3)           | 46(2)           | 44(2)           | 9(2)            | 2(2)            | 0(2)            |
| C(8)  | 41(2)           | 45(2)           | 35(2)           | 0(2)            | 6(2)            | -2(2)           |
| C(9)  | 31(2)           | 36(2)           | 40(2)           | 1(2)            | 7(2)            | 5(2)            |
| C(10) | 56(3)           | 44(2)           | 53(3)           | -2(2)           | 14(2)           | 11(2)           |
| C(11) | 51(2)           | 33(2)           | 46(2)           | -2(2)           | 5(2)            | 6(2)            |
| C(12) | 29(2)           | 37(2)           | 44(2)           | 5(2)            | -2(2)           | 1(2)            |
| C(13) | 32(2)           | 43(2)           | 42(2)           | 2(2)            | 0(2)            | 4(2)            |
| C(14) | 48(3)           | 61(3)           | 44(2)           | -2(2)           | 4(2)            | -13(2)          |
| C(15) | 60(3)           | 80(4)           | 45(3)           | -10(3)          | -8(2)           | -9(3)           |
| C(16) | 56(3)           | 72(3)           | 44(3)           | 13(2)           | 9(2)            | 8(2)            |
| C(17) | 52(3)           | 61(3)           | 48(3)           | 6(2)            | 12(2)           | -2(2)           |
| C(18) | 48(3)           | 50(3)           | 48(3)           | -1(2)           | 8(2)            | -3(2)           |
| C(19) | 98(5)           | 103(5)          | 36(3)           | 3(3)            | -3(3)           | 21(4)           |
| C(20) | 286(16)         | 170(10)         | 42(4)           | 25(5)           | 12(6)           | 136(11)         |
| C(21) | 126(7)          | 131(7)          | 54(4)           | -3(4)           | 40(4)           | -34(6)          |
| C(22) | 93(5)           | 138(7)          | 41(3)           | -9(4)           | 10(3)           | 1(5)            |
| C(23) | 34(2)           | 38(2)           | 43(2)           | -2(2)           | 10(2)           | 3(2)            |
| C(24) | 38(2)           | 40(2)           | 41(2)           | 0(2)            | 6(2)            | 6(2)            |
| C(25) | 38(2)           | 47(2)           | 43(2)           | 2(2)            | 2(2)            | 6(2)            |
| C(26) | 56(3)           | 57(3)           | 41(2)           | -1(2)           | 1(2)            | -9(2)           |
| C(27) | 62(3)           | 84(4)           | 40(3)           | 9(3)            | 1(2)            | -9(3)           |
| C(28) | 62(3)           | 65(3)           | 52(3)           | 21(2)           | 1(2)            | -5(2)           |
| C(29) | 59(3)           | 47(2)           | 55(3)           | 9(2)            | 5(2)            | 8(2)            |
| C(30) | 43(2)           | 44(2)           | 48(3)           | 0(2)            | 3(2)            | 6(2)            |
| C(31) | 47(2)           | 34(2)           | 42(2)           | -4(2)           | 9(2)            | -1(2)           |

|       |         |         |       |        |       |        |
|-------|---------|---------|-------|--------|-------|--------|
| C(32) | 58(3)   | 49(3)   | 39(2) | -6(2)  | 11(2) | 1(2)   |
| C(33) | 35(2)   | 39(2)   | 42(2) | -4(2)  | 10(2) | -1(2)  |
| C(34) | 36(2)   | 33(2)   | 46(2) | 5(2)   | 11(2) | 0(2)   |
| C(35) | 41(2)   | 36(2)   | 39(2) | 1(2)   | 9(2)  | -7(2)  |
| C(36) | 36(2)   | 39(2)   | 45(2) | 0(2)   | 7(2)  | -4(2)  |
| C(37) | 38(2)   | 48(2)   | 51(3) | -3(2)  | 13(2) | -2(2)  |
| C(38) | 64(3)   | 48(2)   | 44(3) | 3(2)   | 19(2) | -1(2)  |
| C(39) | 53(3)   | 59(3)   | 35(2) | 3(2)   | 5(2)  | 4(2)   |
| C(40) | 37(2)   | 46(2)   | 46(2) | 2(2)   | 5(2)  | 0(2)   |
| C(41) | 75(4)   | 85(4)   | 35(3) | -5(2)  | 12(2) | 11(3)  |
| C(42) | 187(10) | 194(12) | 49(4) | -25(6) | 45(5) | -94(9) |
| C(43) | 121(7)  | 212(13) | 68(5) | -45(7) | 2(5)  | 60(8)  |
| C(44) | 99(6)   | 200(12) | 97(6) | -83(7) | 22(5) | -26(7) |
| N(1)  | 48(2)   | 39(2)   | 36(2) | 6(2)   | 6(1)  | -7(2)  |
| N(2)  | 33(2)   | 41(2)   | 43(2) | -1(2)  | 11(1) | -1(1)  |
| O(1)  | 41(2)   | 35(1)   | 40(2) | 3(1)   | 7(1)  | 2(1)   |
| O(2)  | 36(2)   | 54(2)   | 44(2) | 2(1)   | 6(1)  | -8(1)  |
| O(3)  | 63(2)   | 31(1)   | 54(2) | 2(1)   | 19(2) | 0(1)   |
| O(4)  | 33(2)   | 52(2)   | 46(2) | -8(1)  | 6(1)  | -2(1)  |
| F(1)  | 41(1)   | 43(1)   | 48(1) | -7(1)  | 11(1) | -7(1)  |
| F(2)  | 42(1)   | 44(1)   | 53(2) | 0(1)   | 10(1) | 7(1)   |
| Cl(1) | 120(1)  | 122(2)  | 47(1) | 4(1)   | 35(1) | 10(1)  |
| Cl(2) | 122(2)  | 117(2)  | 38(1) | 2(1)   | 12(1) | -22(1) |

---

Table 5. Hydrogen coordinates ( $\times 10^4$ ) and isotropic displacement parameters ( $\text{\AA}^2 \times 10^3$ ) for toste52.

|        | x     | y    | z    | U(eq) |
|--------|-------|------|------|-------|
| H(4)   | 5842  | 4205 | 2586 | 61    |
| H(6)   | 4251  | 7273 | 1954 | 67    |
| H(7)   | 3376  | 7597 | 3047 | 57    |
| H(9A)  | 3743  | 5874 | 5071 | 42    |
| H(9B)  | 5379  | 5944 | 4733 | 42    |
| H(10A) | 5644  | 2898 | 3301 | 60    |
| H(10B) | 5337  | 2539 | 4093 | 60    |
| H(11A) | 4969  | 3005 | 5069 | 52    |
| H(11B) | 6229  | 4007 | 5168 | 52    |
| H(14)  | 6464  | 6145 | 7261 | 61    |
| H(15)  | 6056  | 6173 | 8404 | 75    |
| H(17)  | 2762  | 3750 | 8063 | 64    |
| H(18)  | 3130  | 3725 | 6910 | 58    |
| H(20A) | 5012  | 3310 | 9207 | 250   |
| H(20B) | 4972  | 3876 | 9952 | 250   |
| H(20C) | 6308  | 4233 | 9473 | 250   |
| H(21A) | 2057  | 3986 | 9103 | 152   |
| H(21B) | 1712  | 5283 | 8926 | 152   |
| H(21C) | 2173  | 4899 | 9711 | 152   |
| H(22A) | 4014  | 6182 | 9901 | 136   |
| H(22B) | 4217  | 6695 | 9154 | 136   |
| H(22C) | 5700  | 6131 | 9605 | 136   |
| H(26)  | -276  | 6103 | 2268 | 62    |
| H(28)  | 1077  | 9303 | 1904 | 72    |
| H(29)  | 902   | 9767 | 3055 | 64    |
| H(31A) | 13    | 8015 | 4974 | 49    |
| H(31B) | 1367  | 7454 | 4575 | 49    |
| H(32A) | -739  | 4920 | 3018 | 58    |
| H(32B) | -1146 | 4669 | 3813 | 58    |
| H(33A) | -1388 | 5222 | 4831 | 46    |



|        |       |      |      |     |
|--------|-------|------|------|-----|
| H(33B) | 475   | 5468 | 4925 | 46  |
| H(36)  | -1925 | 7660 | 6451 | 48  |
| H(37)  | -2319 | 8379 | 7520 | 54  |
| H(39)  | 1978  | 7251 | 8309 | 59  |
| H(40)  | 2406  | 6543 | 7227 | 52  |
| H(42A) | -756  | 7550 | 9689 | 211 |
| H(42B) | -65   | 6718 | 9148 | 211 |
| H(42C) | -1909 | 7034 | 9062 | 211 |
| H(43A) | -2414 | 9058 | 9208 | 202 |
| H(43B) | -2980 | 8465 | 8484 | 202 |
| H(43C) | -2081 | 9649 | 8498 | 202 |
| H(44A) | 415   | 9431 | 9448 | 197 |
| H(44B) | 1125  | 9494 | 8719 | 197 |
| H(44C) | 1665  | 8507 | 9253 | 197 |
| H(1)   | 3716  | 3743 | 5934 | 49  |
| H(2)   | -1660 | 6391 | 5730 | 46  |

---

## 17b (nosyl-derivative)

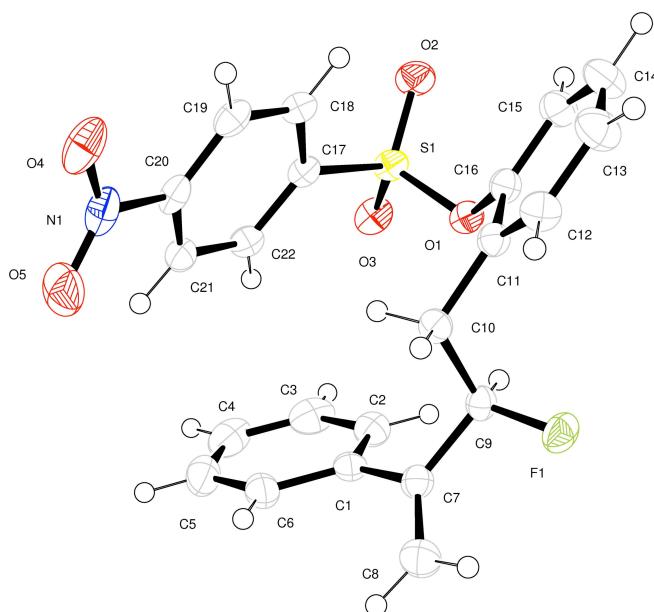

A colorless rod 0.060 x 0.040 x 0.040 mm in size was mounted on a Cryoloop with Paratone oil. Data were collected in a nitrogen gas stream at 100(2) K using phi and omega scans. Crystal-to-detector distance was 60 mm and exposure time was 5 seconds per frame using a scan width of 1.0°. Data collection was 100.0% complete to 67.000° in  $\theta$ . A total of 43179 reflections were collected covering the indices,  $-8 \leq h \leq 8$ ,  $-16 \leq k \leq 16$ ,  $-26 \leq l \leq 26$ . 3685 reflections were found to be symmetry independent, with an  $R_{\text{int}}$  of 0.0226. Indexing and unit cell refinement indicated a primitive, orthorhombic lattice. The space group was found to be P 21 21 21 (No. 19). The data were integrated using the Bruker SAINT software program and scaled using the SADABS software program. Solution by direct methods (SIR-2011) produced a complete heavy-atom phasing model consistent with the proposed structure. All non-hydrogen atoms were refined anisotropically by full-matrix least-squares (SHELXL-2012). All hydrogen atoms were placed using a riding model. Their positions were constrained relative to their parent atom using

the appropriate HFIX command in SHELXL-2012. Absolute stereochemistry was unambiguously determined to be *R* at C9.

Table 1. Crystal data and structure refinement for toste72.

|                                   |                                                      |          |
|-----------------------------------|------------------------------------------------------|----------|
| X-ray ID                          | toste72                                              |          |
| Sample/notebook ID                | JW-10-NS                                             |          |
| Empirical formula                 | C <sub>22</sub> H <sub>18</sub> F N O <sub>5</sub> S |          |
| Formula weight                    | 427.43                                               |          |
| Temperature                       | 100(2) K                                             |          |
| Wavelength                        | 1.54178 Å                                            |          |
| Crystal system                    | Orthorhombic                                         |          |
| Space group                       | P 21 21 21                                           |          |
| Unit cell dimensions              | a = 6.8101(4) Å                                      | α = 90°. |
|                                   | b = 13.2958(8) Å                                     | β = 90°. |
|                                   | c = 22.2494(14) Å                                    | γ = 90°. |
| Volume                            | 2014.6(2) Å <sup>3</sup>                             |          |
| Z                                 | 4                                                    |          |
| Density (calculated)              | 1.409 Mg/m <sup>3</sup>                              |          |
| Absorption coefficient            | 1.817 mm <sup>-1</sup>                               |          |
| F(000)                            | 888                                                  |          |
| Crystal size                      | 0.060 x 0.040 x 0.040 mm <sup>3</sup>                |          |
| Crystal color/habit               | colorless rod                                        |          |
| Theta range for data collection   | 3.873 to 68.334°.                                    |          |
| Index ranges                      | -8 ≤ h ≤ 8, -16 ≤ k ≤ 16, -26 ≤ l ≤ 26               |          |
| Reflections collected             | 43179                                                |          |
| Independent reflections           | 3685 [R(int) = 0.0226]                               |          |
| Completeness to theta = 67.000°   | 100.0 %                                              |          |
| Absorption correction             | Semi-empirical from equivalents                      |          |
| Max. and min. transmission        | 0.929 and 0.841                                      |          |
| Refinement method                 | Full-matrix least-squares on F <sup>2</sup>          |          |
| Data / restraints / parameters    | 3685 / 0 / 271                                       |          |
| Goodness-of-fit on F <sup>2</sup> | 1.065                                                |          |
| Final R indices [I > 2σ(I)]       | R1 = 0.0209, wR2 = 0.0555                            |          |
| R indices (all data)              | R1 = 0.0211, wR2 = 0.0557                            |          |
| Absolute structure parameter      | -0.002(3)                                            |          |
| Extinction coefficient            | n/a                                                  |          |
| Largest diff. peak and hole       | 0.178 and -0.217 e.Å <sup>-3</sup>                   |          |

Table 2. Atomic coordinates ( $\times 10^4$ ) and equivalent isotropic displacement parameters ( $\text{\AA}^2 \times 10^3$ ) for toste72.  $U(\text{eq})$  is defined as one third of the trace of the orthogonalized  $U^{ij}$  tensor.

|       | x       | y        | z        | $U(\text{eq})$ |
|-------|---------|----------|----------|----------------|
| C(1)  | 5215(3) | 12126(1) | 1663(1)  | 26(1)          |
| C(2)  | 7181(3) | 11910(1) | 1538(1)  | 32(1)          |
| C(3)  | 8374(3) | 11480(2) | 1974(1)  | 41(1)          |
| C(4)  | 7629(4) | 11262(2) | 2537(1)  | 47(1)          |
| C(5)  | 5687(4) | 11489(2) | 2669(1)  | 45(1)          |
| C(6)  | 4491(3) | 11913(1) | 2238(1)  | 35(1)          |
| C(7)  | 3880(3) | 12562(1) | 1204(1)  | 26(1)          |
| C(8)  | 2574(4) | 13271(2) | 1330(1)  | 40(1)          |
| C(9)  | 4009(2) | 12090(1) | 588(1)   | 24(1)          |
| C(10) | 2945(2) | 11083(1) | 574(1)   | 25(1)          |
| C(11) | 3181(3) | 10524(1) | -11(1)   | 26(1)          |
| C(12) | 1647(3) | 10472(1) | -420(1)  | 33(1)          |
| C(13) | 1859(3) | 9973(2)  | -964(1)  | 41(1)          |
| C(14) | 3613(3) | 9505(2)  | -1105(1) | 42(1)          |
| C(15) | 5178(3) | 9548(2)  | -710(1)  | 34(1)          |
| C(16) | 4936(3) | 10053(1) | -170(1)  | 27(1)          |
| C(17) | 5427(2) | 8871(1)  | 1041(1)  | 24(1)          |
| C(18) | 3986(3) | 8253(1)  | 795(1)   | 26(1)          |
| C(19) | 2288(3) | 8086(1)  | 1122(1)  | 28(1)          |
| C(20) | 2111(2) | 8537(1)  | 1679(1)  | 27(1)          |
| C(21) | 3567(3) | 9120(1)  | 1935(1)  | 28(1)          |
| C(22) | 5266(3) | 9288(1)  | 1610(1)  | 26(1)          |
| N(1)  | 245(2)  | 8409(1)  | 2005(1)  | 36(1)          |
| O(1)  | 6555(2) | 10168(1) | 228(1)   | 27(1)          |
| O(2)  | 7819(2) | 8428(1)  | 168(1)   | 36(1)          |
| O(3)  | 8948(2) | 9643(1)  | 936(1)   | 33(1)          |
| O(4)  | -903(2) | 7769(1)  | 1825(1)  | 45(1)          |
| O(5)  | -55(3)  | 8961(1)  | 2434(1)  | 51(1)          |
| F(1)  | 3122(2) | 12724(1) | 160(1)   | 34(1)          |
| S(1)  | 7421(1) | 9220(1)  | 582(1)   | 26(1)          |

Table 3. Bond lengths [Å] and angles [°] for *toste72*.

|                |            |                |            |
|----------------|------------|----------------|------------|
| C(1)-C(2)      | 1.397(3)   | C(12)-H(12)    | 0.9500     |
| C(1)-C(6)      | 1.401(2)   | C(13)-C(14)    | 1.383(3)   |
| C(1)-C(7)      | 1.484(2)   | C(13)-H(13)    | 0.9500     |
| C(2)-C(3)      | 1.388(3)   | C(14)-C(15)    | 1.381(3)   |
| C(2)-H(2)      | 0.9500     | C(14)-H(14)    | 0.9500     |
| C(3)-C(4)      | 1.383(3)   | C(15)-C(16)    | 1.388(2)   |
| C(3)-H(3)      | 0.9500     | C(15)-H(15)    | 0.9500     |
| C(4)-C(5)      | 1.388(4)   | C(16)-O(1)     | 1.422(2)   |
| C(4)-H(4)      | 0.9500     | C(17)-C(22)    | 1.387(2)   |
| C(5)-C(6)      | 1.377(3)   | C(17)-C(18)    | 1.391(2)   |
| C(5)-H(5)      | 0.9500     | C(17)-S(1)     | 1.7613(17) |
| C(6)-H(6)      | 0.9500     | C(18)-C(19)    | 1.383(3)   |
| C(7)-C(8)      | 1.326(3)   | C(18)-H(18)    | 0.9500     |
| C(7)-C(9)      | 1.512(2)   | C(19)-C(20)    | 1.383(3)   |
| C(8)-H(8A)     | 0.9500     | C(19)-H(19)    | 0.9500     |
| C(8)-H(8B)     | 0.9500     | C(20)-C(21)    | 1.381(3)   |
| C(9)-F(1)      | 1.4080(19) | C(20)-N(1)     | 1.474(2)   |
| C(9)-C(10)     | 1.523(2)   | C(21)-C(22)    | 1.383(3)   |
| C(9)-H(9)      | 1.0000     | C(21)-H(21)    | 0.9500     |
| C(10)-C(11)    | 1.507(2)   | C(22)-H(22)    | 0.9500     |
| C(10)-H(10A)   | 0.9900     | N(1)-O(5)      | 1.221(2)   |
| C(10)-H(10B)   | 0.9900     | N(1)-O(4)      | 1.224(2)   |
| C(11)-C(12)    | 1.387(3)   | O(1)-S(1)      | 1.6002(12) |
| C(11)-C(16)    | 1.395(3)   | O(2)-S(1)      | 1.4237(13) |
| C(12)-C(13)    | 1.389(3)   | O(3)-S(1)      | 1.4214(14) |
| C(2)-C(1)-C(6) | 118.51(18) | C(2)-C(3)-H(3) | 119.8      |
| C(2)-C(1)-C(7) | 122.03(16) | C(3)-C(4)-C(5) | 119.7(2)   |
| C(6)-C(1)-C(7) | 119.45(17) | C(3)-C(4)-H(4) | 120.2      |
| C(3)-C(2)-C(1) | 120.44(19) | C(5)-C(4)-H(4) | 120.2      |
| C(3)-C(2)-H(2) | 119.8      | C(6)-C(5)-C(4) | 120.4(2)   |
| C(1)-C(2)-H(2) | 119.8      | C(6)-C(5)-H(5) | 119.8      |
| C(4)-C(3)-C(2) | 120.3(2)   | C(4)-C(5)-H(5) | 119.8      |
| C(4)-C(3)-H(3) | 119.8      | C(5)-C(6)-C(1) | 120.7(2)   |

|                     |            |                   |            |
|---------------------|------------|-------------------|------------|
| C(5)-C(6)-H(6)      | 119.7      | C(15)-C(16)-O(1)  | 119.96(16) |
| C(1)-C(6)-H(6)      | 119.7      | C(11)-C(16)-O(1)  | 117.27(14) |
| C(8)-C(7)-C(1)      | 122.97(17) | C(22)-C(17)-C(18) | 122.60(16) |
| C(8)-C(7)-C(9)      | 121.68(17) | C(22)-C(17)-S(1)  | 119.03(13) |
| C(1)-C(7)-C(9)      | 115.22(14) | C(18)-C(17)-S(1)  | 118.13(13) |
| C(7)-C(8)-H(8A)     | 120.0      | C(19)-C(18)-C(17) | 118.58(16) |
| C(7)-C(8)-H(8B)     | 120.0      | C(19)-C(18)-H(18) | 120.7      |
| H(8A)-C(8)-H(8B)    | 120.0      | C(17)-C(18)-H(18) | 120.7      |
| F(1)-C(9)-C(7)      | 109.85(13) | C(20)-C(19)-C(18) | 118.27(16) |
| F(1)-C(9)-C(10)     | 108.04(13) | C(20)-C(19)-H(19) | 120.9      |
| C(7)-C(9)-C(10)     | 110.80(14) | C(18)-C(19)-H(19) | 120.9      |
| F(1)-C(9)-H(9)      | 109.4      | C(21)-C(20)-C(19) | 123.46(16) |
| C(7)-C(9)-H(9)      | 109.4      | C(21)-C(20)-N(1)  | 118.69(16) |
| C(10)-C(9)-H(9)     | 109.4      | C(19)-C(20)-N(1)  | 117.83(16) |
| C(11)-C(10)-C(9)    | 113.52(14) | C(20)-C(21)-C(22) | 118.35(16) |
| C(11)-C(10)-H(10A)  | 108.9      | C(20)-C(21)-H(21) | 120.8      |
| C(9)-C(10)-H(10A)   | 108.9      | C(22)-C(21)-H(21) | 120.8      |
| C(11)-C(10)-H(10B)  | 108.9      | C(21)-C(22)-C(17) | 118.64(16) |
| C(9)-C(10)-H(10B)   | 108.9      | C(21)-C(22)-H(22) | 120.7      |
| H(10A)-C(10)-H(10B) | 107.7      | C(17)-C(22)-H(22) | 120.7      |
| C(12)-C(11)-C(16)   | 117.14(16) | O(5)-N(1)-O(4)    | 124.62(17) |
| C(12)-C(11)-C(10)   | 120.75(16) | O(5)-N(1)-C(20)   | 117.37(17) |
| C(16)-C(11)-C(10)   | 122.10(16) | O(4)-N(1)-C(20)   | 118.00(17) |
| C(11)-C(12)-C(13)   | 121.20(18) | C(16)-O(1)-S(1)   | 120.46(11) |
| C(11)-C(12)-H(12)   | 119.4      | O(3)-S(1)-O(2)    | 120.81(8)  |
| C(13)-C(12)-H(12)   | 119.4      | O(3)-S(1)-O(1)    | 103.36(7)  |
| C(14)-C(13)-C(12)   | 120.12(19) | O(2)-S(1)-O(1)    | 109.54(7)  |
| C(14)-C(13)-H(13)   | 119.9      | O(3)-S(1)-C(17)   | 110.26(8)  |
| C(12)-C(13)-H(13)   | 119.9      | O(2)-S(1)-C(17)   | 109.08(8)  |
| C(15)-C(14)-C(13)   | 120.30(17) | O(1)-S(1)-C(17)   | 102.05(7)  |
| C(15)-C(14)-H(14)   | 119.8      |                   |            |
| C(13)-C(14)-H(14)   | 119.8      |                   |            |
| C(14)-C(15)-C(16)   | 118.60(18) |                   |            |
| C(14)-C(15)-H(15)   | 120.7      |                   |            |
| C(16)-C(15)-H(15)   | 120.7      |                   |            |
| C(15)-C(16)-C(11)   | 122.61(17) |                   |            |

---

Symmetry transformations used to generate equivalent atoms:



Table 4. Anisotropic displacement parameters ( $\text{\AA}^2 \times 10^3$ ) for toste72. The anisotropic displacement factor exponent takes the form:  $-2\pi^2 [h^2 a^{*2} U^{11} + \dots + 2 h k a^* b^* U^{12}]$

|       | U <sup>11</sup> | U <sup>22</sup> | U <sup>33</sup> | U <sup>23</sup> | U <sup>13</sup> | U <sup>12</sup> |
|-------|-----------------|-----------------|-----------------|-----------------|-----------------|-----------------|
| C(1)  | 32(1)           | 21(1)           | 26(1)           | -4(1)           | -1(1)           | -5(1)           |
| C(2)  | 31(1)           | 32(1)           | 33(1)           | -2(1)           | -6(1)           | -4(1)           |
| C(3)  | 37(1)           | 35(1)           | 52(1)           | -6(1)           | -19(1)          | -3(1)           |
| C(4)  | 68(2)           | 33(1)           | 42(1)           | 1(1)            | -32(1)          | -9(1)           |
| C(5)  | 70(2)           | 37(1)           | 27(1)           | 1(1)            | -9(1)           | -19(1)          |
| C(6)  | 46(1)           | 31(1)           | 28(1)           | -4(1)           | 2(1)            | -12(1)          |
| C(7)  | 26(1)           | 25(1)           | 28(1)           | 1(1)            | 4(1)            | -2(1)           |
| C(8)  | 43(1)           | 38(1)           | 38(1)           | -1(1)           | 6(1)            | 10(1)           |
| C(9)  | 22(1)           | 27(1)           | 24(1)           | 4(1)            | -1(1)           | 2(1)            |
| C(10) | 21(1)           | 27(1)           | 27(1)           | 0(1)            | 4(1)            | 1(1)            |
| C(11) | 27(1)           | 24(1)           | 27(1)           | 1(1)            | 5(1)            | -2(1)           |
| C(12) | 30(1)           | 34(1)           | 35(1)           | -1(1)           | -1(1)           | 2(1)            |
| C(13) | 43(1)           | 47(1)           | 34(1)           | -7(1)           | -8(1)           | 0(1)            |
| C(14) | 52(1)           | 45(1)           | 29(1)           | -10(1)          | 4(1)            | 0(1)            |
| C(15) | 36(1)           | 34(1)           | 33(1)           | -3(1)           | 12(1)           | 1(1)            |
| C(16) | 28(1)           | 27(1)           | 27(1)           | 2(1)            | 3(1)            | -3(1)           |
| C(17) | 19(1)           | 20(1)           | 32(1)           | 2(1)            | 2(1)            | 1(1)            |
| C(18) | 27(1)           | 21(1)           | 32(1)           | 0(1)            | -1(1)           | 0(1)            |
| C(19) | 23(1)           | 23(1)           | 39(1)           | 6(1)            | -5(1)           | -3(1)           |
| C(20) | 23(1)           | 23(1)           | 36(1)           | 11(1)           | 3(1)            | 1(1)            |
| C(21) | 32(1)           | 24(1)           | 28(1)           | 3(1)            | 3(1)            | 2(1)            |
| C(22) | 26(1)           | 22(1)           | 31(1)           | 0(1)            | -2(1)           | -2(1)           |
| N(1)  | 29(1)           | 35(1)           | 44(1)           | 17(1)           | 7(1)            | 3(1)            |
| O(1)  | 23(1)           | 25(1)           | 32(1)           | 0(1)            | 5(1)            | 0(1)            |
| O(2)  | 33(1)           | 31(1)           | 44(1)           | -4(1)           | 11(1)           | 6(1)            |
| O(3)  | 20(1)           | 32(1)           | 46(1)           | 4(1)            | 2(1)            | -1(1)           |
| O(4)  | 27(1)           | 42(1)           | 66(1)           | 21(1)           | 3(1)            | -6(1)           |
| O(5)  | 45(1)           | 58(1)           | 49(1)           | 6(1)            | 22(1)           | 2(1)            |
| F(1)  | 38(1)           | 29(1)           | 34(1)           | 6(1)            | -11(1)          | 1(1)            |
| S(1)  | 20(1)           | 24(1)           | 35(1)           | 0(1)            | 5(1)            | 2(1)            |

Table 5. Hydrogen coordinates ( $\times 10^4$ ) and isotropic displacement parameters ( $\text{\AA}^2 \times 10^{-3}$ ) for toste72.

|        | x    | y     | z     | U(eq) |
|--------|------|-------|-------|-------|
| H(2)   | 7705 | 12059 | 1152  | 38    |
| H(3)   | 9708 | 11334 | 1884  | 50    |
| H(4)   | 8443 | 10958 | 2833  | 57    |
| H(5)   | 5179 | 11352 | 3058  | 54    |
| H(6)   | 3162 | 12062 | 2333  | 42    |
| H(8A)  | 2462 | 13522 | 1728  | 48    |
| H(8B)  | 1750 | 13527 | 1021  | 48    |
| H(9)   | 5420 | 11986 | 479   | 29    |
| H(10A) | 3450 | 10657 | 905   | 30    |
| H(10B) | 1529 | 11199 | 648   | 30    |
| H(12)  | 429  | 10782 | -325  | 40    |
| H(13)  | 797  | 9954  | -1241 | 50    |
| H(14)  | 3743 | 9153  | -1474 | 50    |
| H(15)  | 6394 | 9238  | -808  | 41    |
| H(18)  | 4165 | 7953  | 412   | 32    |
| H(19)  | 1270 | 7672  | 967   | 34    |
| H(21)  | 3405 | 9397  | 2326  | 33    |
| H(22)  | 6301 | 9681  | 1773  | 32    |

JW\_07-159pph AV-500 new TBI(HXP) probe

1D 1H starting parameters

- 7.787
- 7.754
- 7.525
- 7.511
- 7.473
- 7.457
- 7.443
- 7.338
- 7.323
- 7.279
- 7.258
- 7.245
- 7.228
- 7.192
- 7.177
- 7.163
- 7.153
- 7.140
- 7.068
- 6.101
- 5.319
- 4.363
- 4.352
- 4.269
- 4.146
- 4.132
- 2.869
- 2.798
- 2.783
- 2.767
- 2.744
- 2.384
- 2.370
- 2.355
- 2.309
- 2.184
- 2.066
- 1.609
- 1.292
- 1.278
- 1.264
- 0.991
- 0.978
- 0.914
- 0.901
- 0.887
- 0.874
- 0.866
- 0.859
- 0.853

```

NAME      JW-07-159-pph
EXPNO     1
PROCNO    1
Date_     20111116
Time      13.42
INSTRUM   AV-500
PROBHD    5 mm TBI 1H/31
PULPROG   zg30
TD         65536
SOLVENT   CDCl3
NS         16
DS         0
SMH        10330.578 Hz
FIDRES     0.157632 Hz
AQ         3.1719923 sec
RG         322.5
DE         48.400 usec
TE         292.4 K
D1         0.10000000 sec
TD0        2
    
```

```

===== CHANNEL f1 =====
NUC1       1H
P1         7.30 usec
PL1        0.00 dB
PL1W       12.55943203 W
SFO1       500.2330889 MHz
SI         65536
SF         500.2300165 MHz
WDW        EM
SSB        0
LB         0.30 Hz
GB         0
PC         4.00
    
```

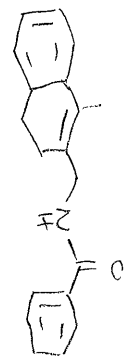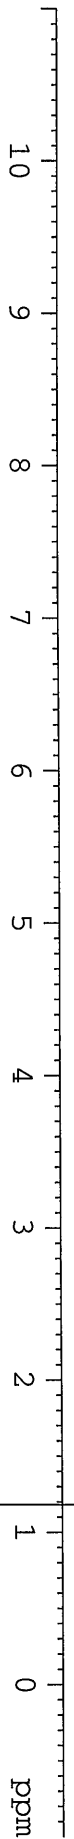

- 1.978
- 0.989
- 2.002
- 1.000
- 0.962
- 1.964
- 0.954
- 2.000
- 2.010
- 2.052
- 2.980
- 2.307

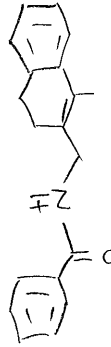

- 167.70
- 136.29
- 135.79
- 134.56
- 131.62
- 131.54
- 129.47
- 128.65
- 127.23
- 126.94
- 126.80
- 126.49
- 123.33

- 77.32
- 77.07
- 76.82

42.37

- 28.51
- 26.98

14.29

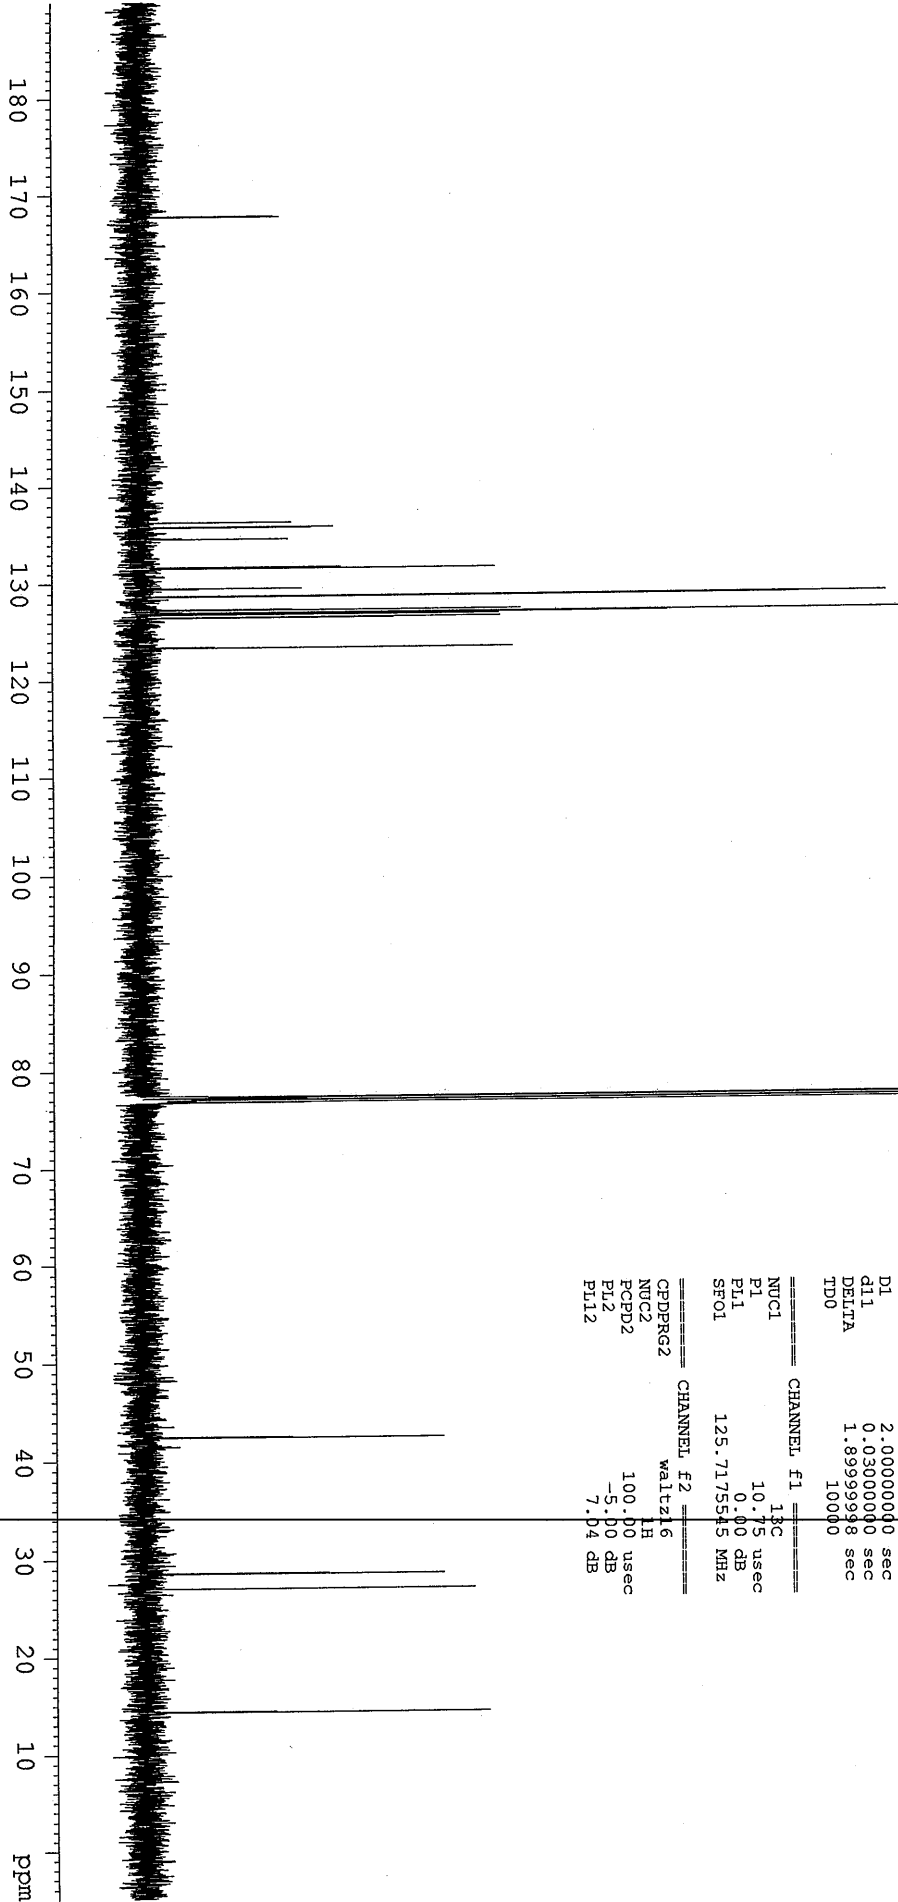

```

NAME          AD-JW-7-158C
EXENO         1
PROCN0        1
Date_         20120210
Time_         10.45
INSTRUM       DRX-500
PROBHD        5 mm BBO BB-1H
PULPROG       zgpg30
TD            65536
SOLVENT       CDCl3
NS            154
DS            0
SMH           41322.312 Hz
FIDRES        0.630528 Hz
AQ            0.7930356 sec
RG            8192
DW            12.100 usec
DE            6.00 usec
TE            293.16 K
D1            2.0000000 sec
d11           0.0300000 sec
DELTA         1.8999998 sec
TD0           10000

===== CHANNEL F1 =====
NUC1          13C
P1            10.75 usec
PL1           0.00 dB
SFO1         125.7175545 MHz

===== CHANNEL F2 =====
CPDPRG2      waltz16
NUC2          1H
PCPD2        100.00 usec
PL2          -5.00 dB
PL12         7.04 dB
  
```

JW-0879 AV-500 new TBI(HXP) probe  
 1D 1H starting parameters

NAME JW-08-79-protonchec  
 EXPNO 1  
 PROCNO 1  
 Date\_ 20120518  
 Time 11.08  
 INSTRUM AV-500  
 PROBHD 5 mm TBI 1H/31  
 PULPROG zg30  
 TD 65536  
 SOLVENT CDCl3  
 NS 16  
 DS 0  
 SMH 10330.578 Hz  
 FIDRES 0.157632 Hz  
 AQ 3.1720407 sec  
 RG 128  
 DW 48.400 usec  
 DE 6.00 usec  
 TE 292.8 K  
 D1 0.10000000 sec  
 TD0 4

==== CHANNEL f1 =====  
 NUC1 1H  
 P1 7.30 usec  
 PL1 0.00 dB  
 PL1W 12.55943203 W  
 SFO1 500.2330889 MHz  
 SI 65536  
 SF 500.2300165 MHz  
 WDW EM  
 SSB 0  
 LB 0.30 Hz  
 GB 0  
 PC 4.00

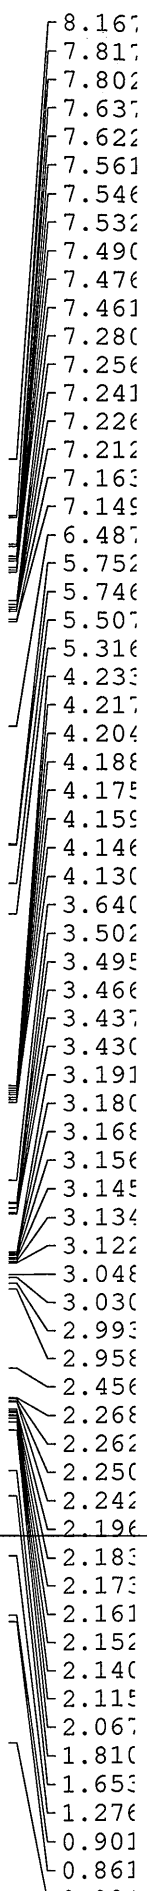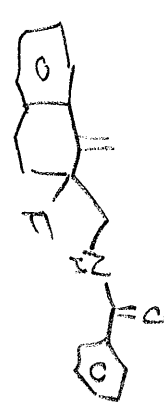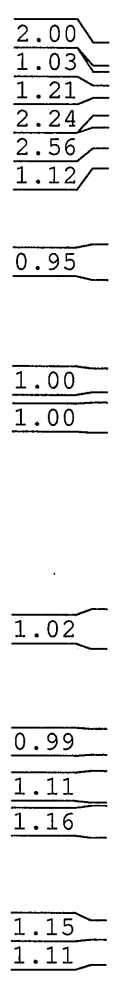

10  
9  
8  
7  
6  
5  
4  
3  
2  
1  
0  
ppm

DRX-500 5mm TBIC probe 13C starting parameters. Rev 1/11/  
 With CPD proton decoupling. Use ns\*td0 scans

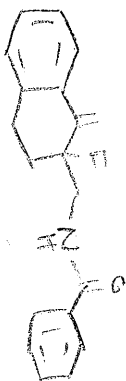

- 167.52
- 143.93
- 143.80
- 134.89
- 134.26
- 132.46
- 131.74
- 128.97
- 128.70
- 128.45
- 128.14
- 127.15
- 127.00
- 126.57
- 124.86
- 109.07
- 108.98
- 97.18
- 95.75
- 77.33
- 77.07
- 76.82

- 44.90
- 44.71
- 30.46
- 30.29
- 27.02
- 26.93

```

NAME          AD-JW-7-79
EXPNO         1
PROCNO        1
Date_         20120210
Time          10:13
INSTRUM       DRX-500
PROBHD        5 mm BBO BB-1H
PULPROG       zgpg30
TD            65536
SOLVENT       CDCl3
NS            568
DS            0
SWH           41322.312 Hz
FIDRES        0.630528 Hz
AQ            0.7930356 sec
RG            3649.1
DE            12.100 usec
TE            293.5 K
D1            2.00000000 sec
d11           0.03000000 sec
DELTA         1.89999998 sec
TD0           10000

===== CHANNEL f1 =====
NUC1          13C
P1            10.75 usec
PL1           0.00 dB
SFO1         125.7175545 MHz

===== CHANNEL f2 =====
CPDPRG2       waltz16
NUC2          1H
PCPD2         100.00 usec
PL2           -5.00 dB
PL12          7.04 dB
  
```

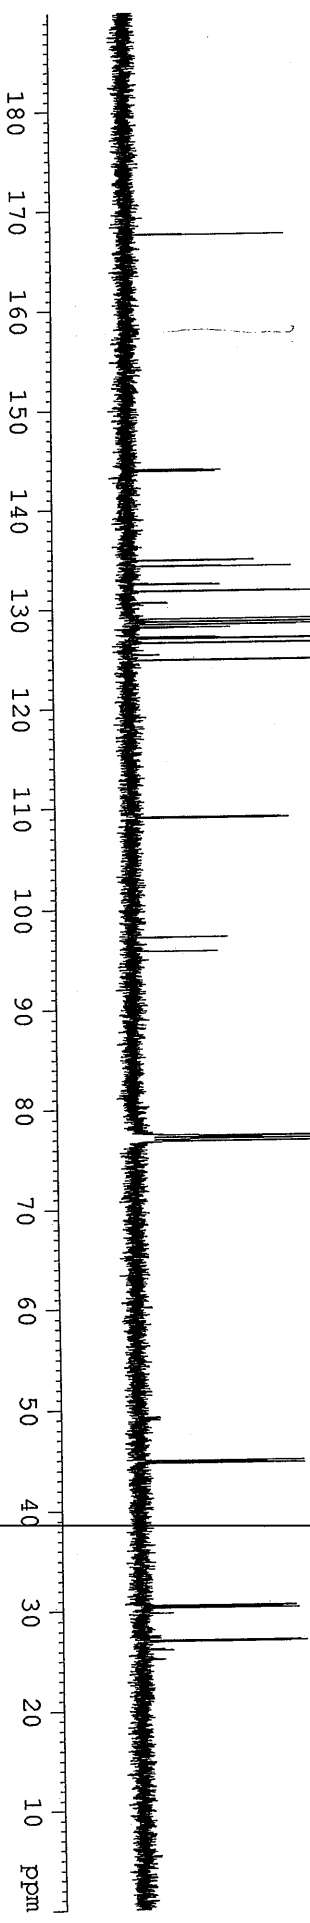

9check AVQ-400 QNP Probe 19F starting parameters. (revised P1, 2/12)  
 chemical shifts relative to CFCl3 at 0 ppm (082103 HVH)  
 sw 239.28 ppm; o1p 0 ppm

0.0  
0.5  
1.1  
1.6  
2.1  
2.6  
3.2

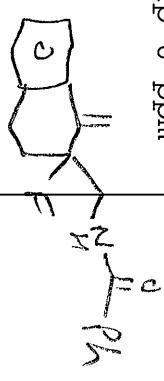

```

NAME          JW-08-79fcheck
EXPNO         1
PROCNO        1
Date_         20120518
Time          11.16
INSTRUM       AVQ-400
PROBHD        5 mm QNP 1H/13
PULPROG       zgfg1m
TD            131072
SOLVENT       CDCl3
NS            32
DS            0
SMH           90090.094 Hz
FIDRES        0.687333 Hz
AQ            0.7275051 sec
RG            1024
DM            5.550 usec
DE            6.00 usec
TE            292.6 K
D1            1.00000000 sec
TD0           4

===== CHANNEL f1 =====
NUC1          19F
P1            16.00 usec
PL1           -3.00 dB
PL1W          20.04748917 W
SFO1          376.4607042 MHz
SI            65536
SF            376.4980736 MHz
WDW           EM
SSB           0
LB            2.00 Hz
GB            0
PC            14.00
  
```

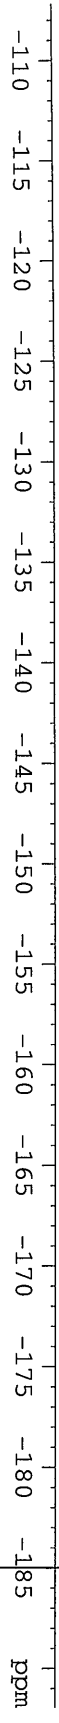

JW-08-79rac / 07-162

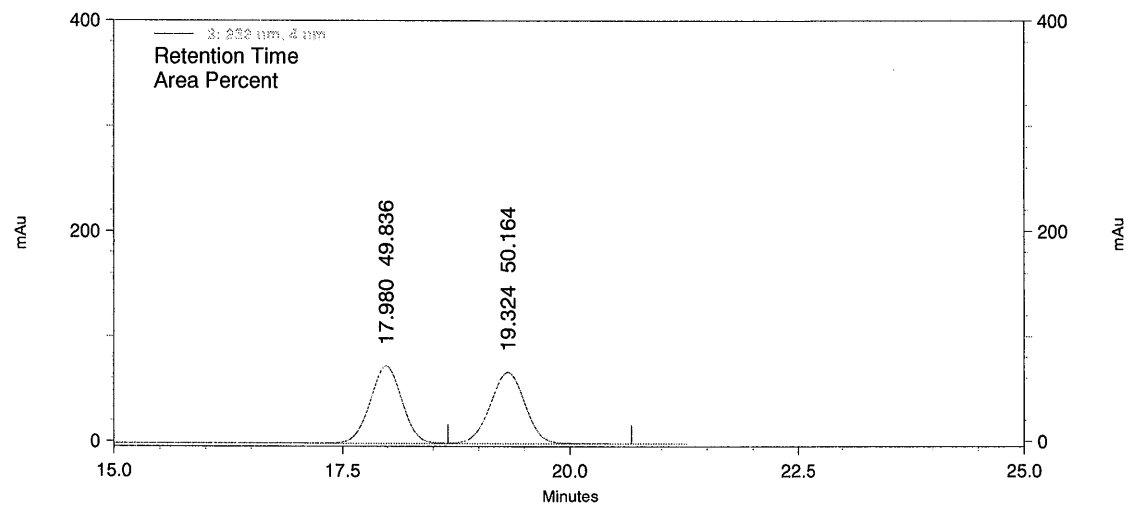

3: 252 nm, 4 nm

Results

| Pk # | Retention Time | Area Percent | Lambda Max |
|------|----------------|--------------|------------|
| 1    | 17.980         | 49.836       | 287        |
| 2    | 19.324         | 50.164       | 204        |

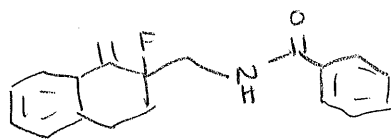



JW-08-79

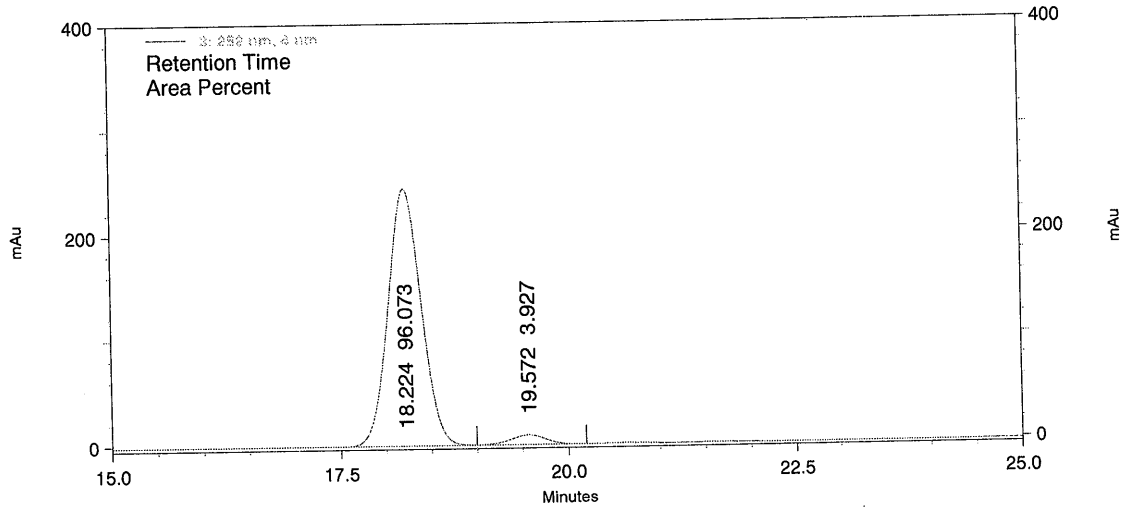

3: 252 nm, 4 nm

Results

| Pk # | Retention Time | Area Percent | Lambda Max |
|------|----------------|--------------|------------|
| 1    | 18.224         | 96.073       | 482        |
| 2    | 19.572         | 3.927        | 205        |

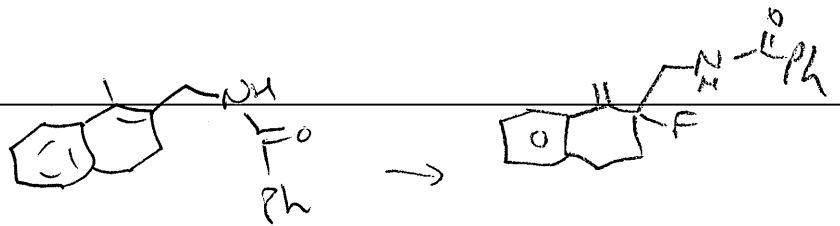

JW-07-ymw substrate suzuki AV-500 new TBI(HXP) probe  
 ID 1H starting parameters  
 CHANNEL NAME F1

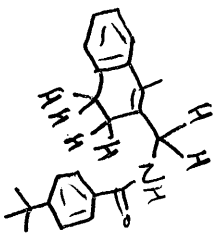

- 7.739
- 7.722
- 7.477
- 7.460
- 7.335
- 7.320
- 7.278
- 7.258
- 7.244
- 7.229
- 7.189
- 7.175
- 7.160
- 7.151
- 7.136
- 7.067
- 6.059

- 4.354
- 4.344

- 2.786
- 2.771
- 2.754
- 2.372
- 2.357
- 2.341
- 2.179
- 2.065
- 1.586
- 1.472
- 1.347
- 1.220
- 0.900

- 2.08
- 2.39
- 6.18
- 1.61

- 1.03

- 1.95

- 2.00

- 2.16
- 2.68

- 3.82
- 8.81

```

NAME          JW-07-ymwSuzuki
EXPNO         1
PROCNO        1
Date_         20111023
Time_         9.56
INSTRUM       5 mm TBI 1H/31
PROBHD        AY-500
PULPROG       zg30
TD            65536
SOLVENT       CDCl3
NS            16
DS            0
SWH           10330.578 Hz
FIDRES        0.151632 Hz
AQ            3.1719923 sec
RG            574.7
DW            48.400 use
DE            6.00 use
TE            292.3 K
D1            0.1000000 sec
TD0           2

===== CHANNEL F1 =====
NUC1          1H
P1            7.30 use
PL1           0.00 dB
PL1M          12.55943203 W
SFO1          500.230889 MHz
SI            65536
SF            500.2300165 MHz
WDW           EM
SSB           0
LB            0.30 Hz
GB            0
PC            4.00
  
```

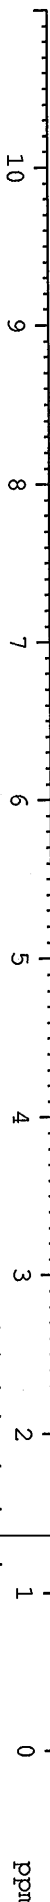

- 167.66
- 154.96
- 136.40
- 135.82
- 131.91
- 131.67
- 129.19
- 127.22
- 126.87
- 126.72
- 126.48
- 125.53
- 123.30
- 77.39
- 77.13
- 76.88
- 42.22
- 34.95
- 31.22
- 28.53
- 26.85
- 14.27

```

NAME          AD-JW-77-SM
EXPNO         1
PROCNO        1
Date_         20120209
Time_         16.44
INSTRUM       DRX-500
PROBHD        5 mm BBO BB-1H
PULPROG       zgpg30
TD            65536
SOLVENT       CDCl3
NS            176
DS            0
SWH           41322.312 Hz
FIDRES        0.630528 Hz
AQ            0.7930356 sec
RG            3251
DW            12.100 usec
DE            6.00 usec
TE            292.9 K
D1            2.00000000 sec
d11           0.03000000 sec
DELTA         1.89999998 sec
ID0           10000
  
```

```

===== CHANNEL F1 =====
NUC1          13C
P1            10.75 usec
PL1           0.00 dB
SFO1         125.7175845 MHz

===== CHANNEL F2 =====
CPDPRG2       waltz16
NUC2          1H
PCPD2        100.00 usec
PL2          -5.00 dB
PL12         7.04 dB
  
```

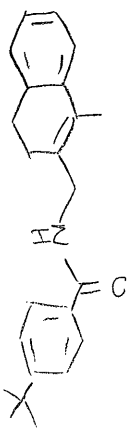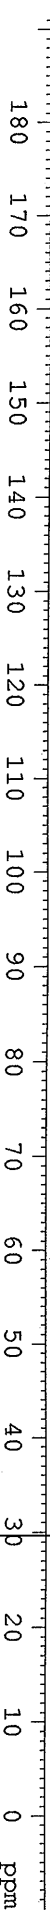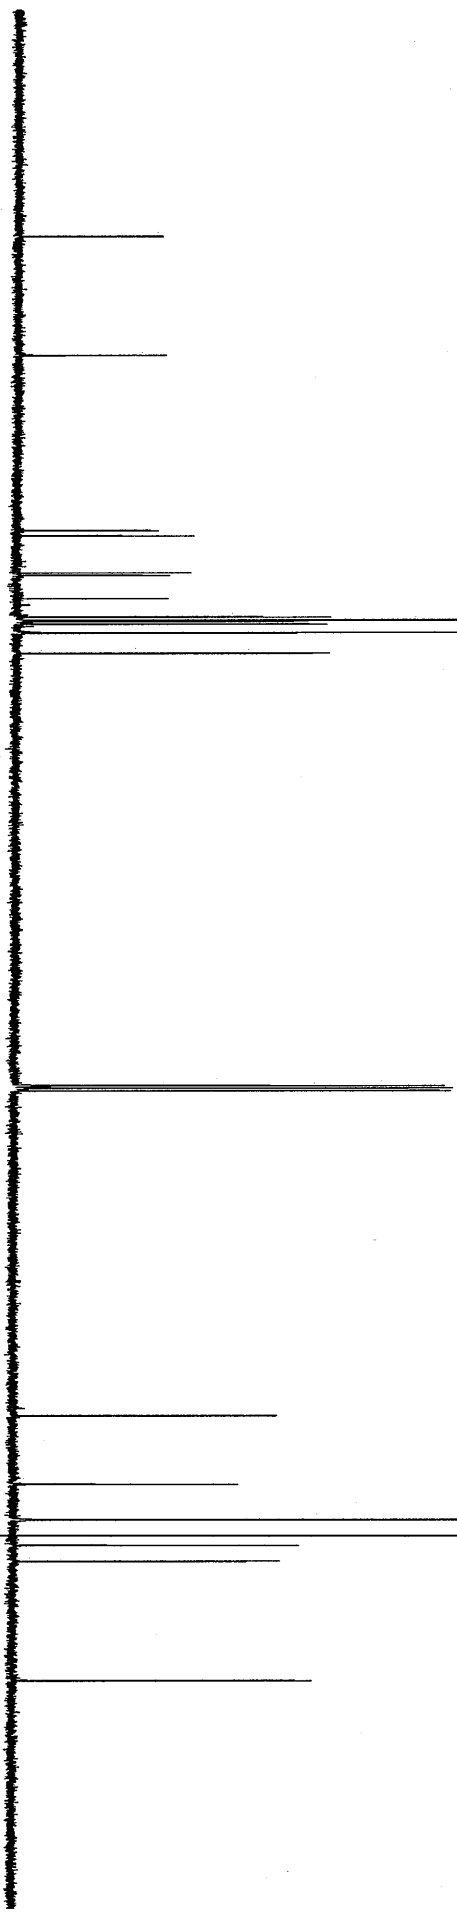

JW-08-16A AV-500 new TBI (HXP) probe  
 1D 1H starting parameters

| NAME      | EXPNO | PROCNO | Date_    | Time  | INSTRUM | PROBHD         | PULPROG | TD    | SOLVENT | NS | DS | SWH          | FTDRES      | AQ            | RG  | DW         | DE       | TE      | D1             | TPD0 |
|-----------|-------|--------|----------|-------|---------|----------------|---------|-------|---------|----|----|--------------|-------------|---------------|-----|------------|----------|---------|----------------|------|
| JW-08-16A | 1     | 1      | 20120106 | 13.51 | AV-500  | 5 mm TBI 1H/31 | zg30    | 65536 | CDCl3   | 24 | 0  | 10330.578 Hz | 0.157632 Hz | 3.1720407 sec | 256 | 48.400 use | 6.00 use | 292.3 K | 0.10000000 sec | 3    |

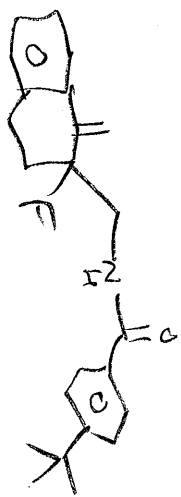

==== CHANNEL f1 =====  
 NUCL1 1H  
 P1 7.30 use  
 P1L1 0.00 dB  
 P1LW 12.55943203 W  
 SFO1 500.2330889 MHz  
 SI 65536  
 SF 500.2300165 MHz  
 EMK  
 WDW 0  
 SSB 0  
 LB 0.30 Hz  
 GB 0  
 PC 4.00

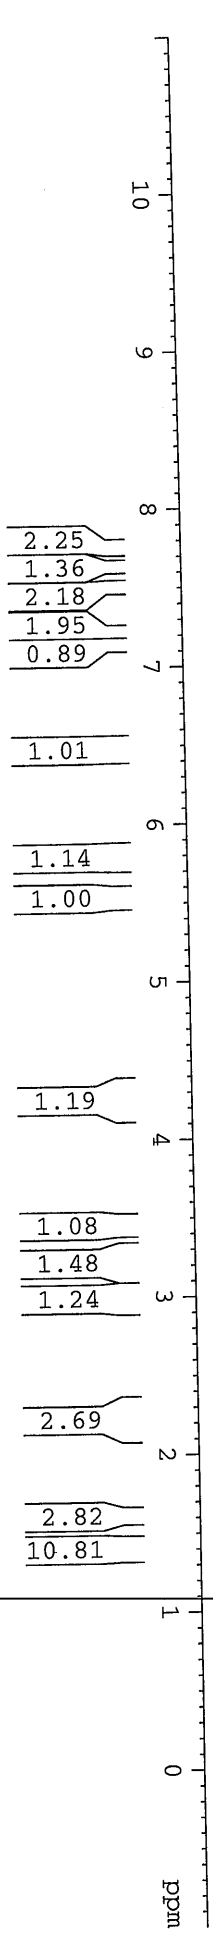

10  
9  
8  
7  
6  
5  
4  
3  
2  
1  
ppm

```

NAME          JW-08-122carb
EXPNO         1
PROCNO        1
Date_         20120310
Time         15.27
INSTRUM      AVQ-400
PROBHD       5 mm QNP 1H/13
PULPROG      zgpg30
TD            65536
SOLVENT      CDC13
NS            578
DS            0
SWMH         24038.461 Hz
FIDRES       0.366798 Hz
AQ           1.3632196 sec
RG           16384
DE           20.800 usec
TE           292.7 K
D1           2.00000000 sec
D11          0.03000000 sec
TD0          9999999
    
```

```

===== CHANNEL f1 =====
NUC1          13C
P1            8.50 usec
PL1          -2.00 dB
PL1W         47.77286148 W
SF01         100.6228298 MHz
    
```

```

===== CHANNEL f2 =====
CPDPRG2      waltz16
NUC2          1H
PCPD2        70.00 usec
PL2           0.00 dB
PL12         15.00 dB
PL13         17.00 dB
PL2W         9.54516888 W
PL12W        0.30184472 W
PL13W        0.19045115 W
SF02         400.1316000 MHz
SI           32768
SF           100.6127755 MHz
WDW          EM
SSB           0
LB           1.50 Hz
GB           0
PC           2.00
    
```

- 167.32
- 155.20
- 143.94
- 143.78
- 134.87
- 132.45
- 131.30
- 128.90
- 128.36
- 128.03
- 126.80
- 126.48
- 125.57
- 125.08
- 124.77
- 108.97
- 108.85
- 97.35
- 95.56
- 77.33
- 77.01
- 76.69
- 44.80
- 44.56
- 34.92
- 31.14
- 30.38
- 30.17
- 26.96
- 26.85

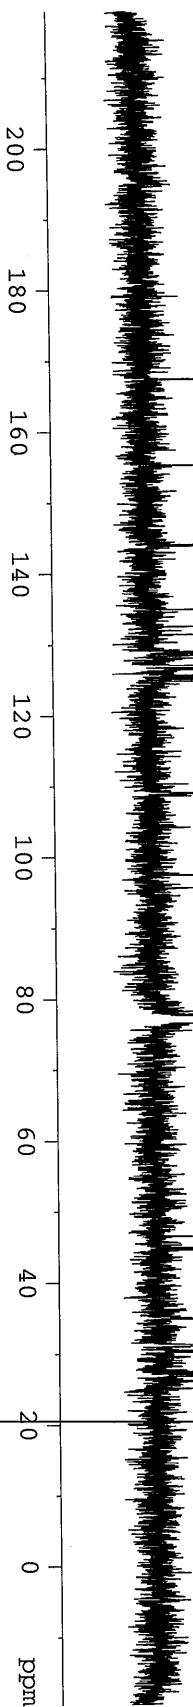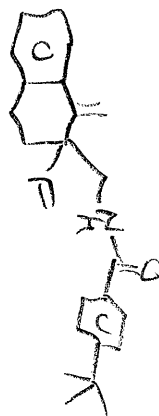

AVQ-400 QNP Probe 19F starting parameters. (revised P  
 chemical shifts relative to CFCl3 at 0 ppm (082103 Hv

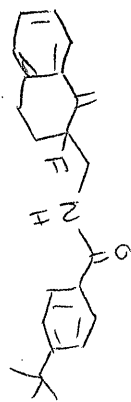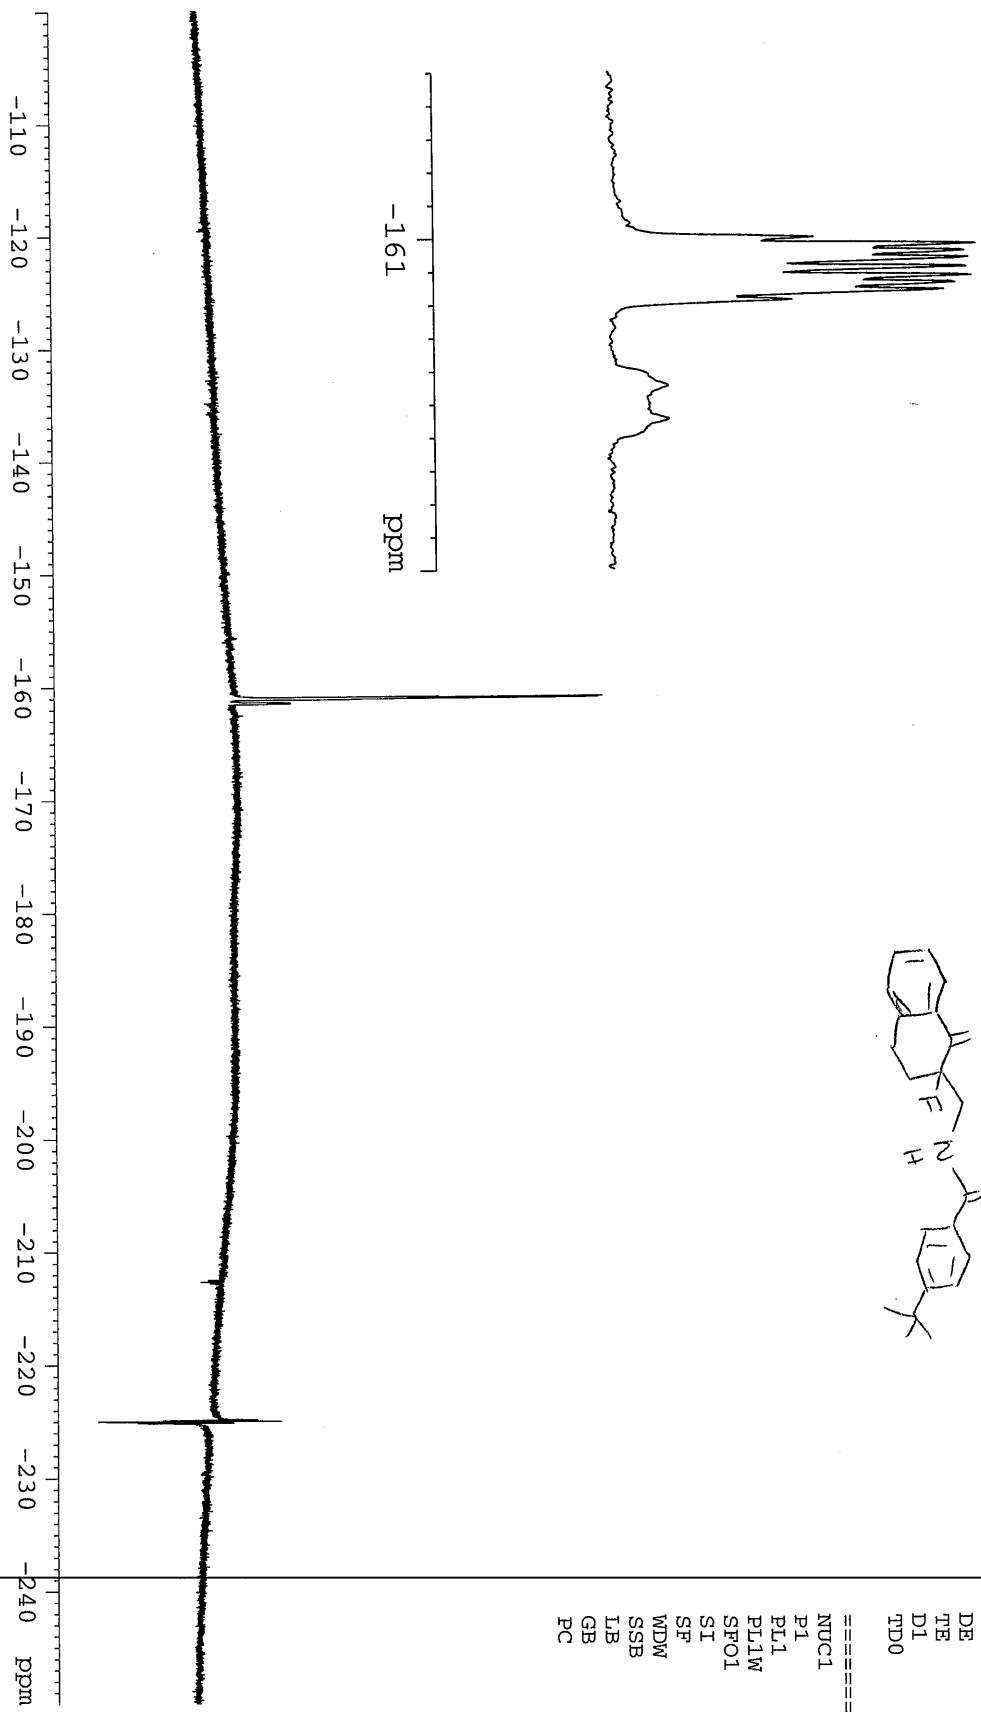

JW-07-117RacF

|         |               |
|---------|---------------|
| NAME    | JW-07-117RacF |
| EXPNO   |               |
| PROCNO  |               |
| Date_   | 2011102       |
| Time    | 7.5           |
| INSTRUM | AVQ-4C        |
| PROBHD  | 5 mm QNP 1H/1 |
| PULPROG | zgfg1c        |
| TD      | 13107         |
| SOLVENT | CDCl3         |
| NS      | 2             |
| DS      |               |
| SWH     | 90090.05      |
| FIDRES  | 0.68733       |
| AQ      | 0.727505      |
| RG      | 25            |
| DW      | 5.55          |
| DE      | 6.C           |
| TTE     | 292.          |
| D1      | 1.000000C     |
| TD0     |               |

==== CHANNEL f1 ==

|      |            |   |
|------|------------|---|
| NUC1 | 19         |   |
| P1   | 16.C       |   |
| PL1  | -3.C       |   |
| PL1W | 20.0474891 |   |
| SFO1 | 376.441875 |   |
| SI   | 6553       |   |
| SF   | 376.498073 | F |
| WDW  |            |   |
| SSB  |            |   |
| LB   | 2.C        |   |
| GB   |            |   |
| PC   | 4.C        |   |

JW-07-119rac\_IC9208\_30min

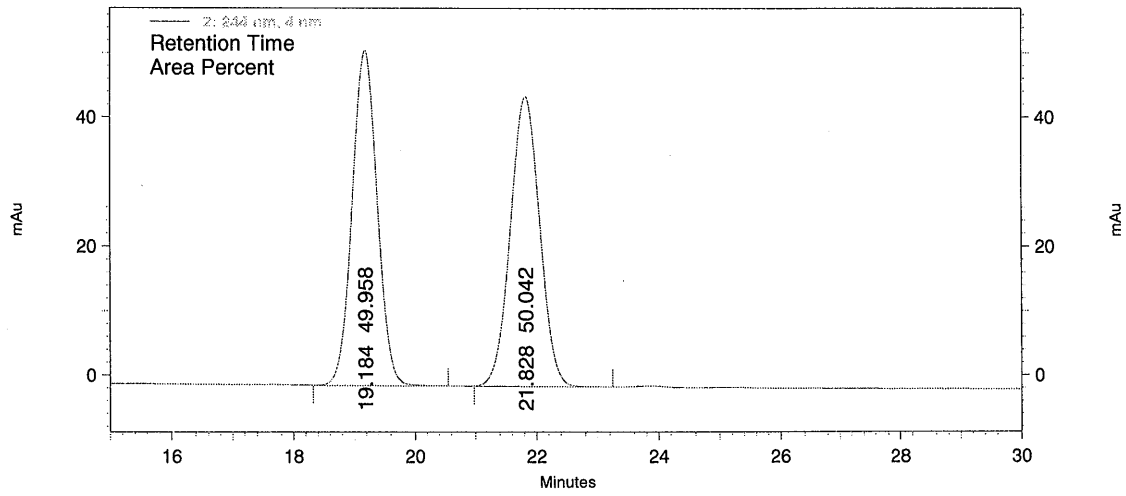

2: 244 nm, 4 nm

Results

| Pk # | Retention Time | Area Percent | Lambda Max |
|------|----------------|--------------|------------|
| 1    | 19.184         | 49.958       | 205        |
| 2    | 21.828         | 50.042       | 205        |

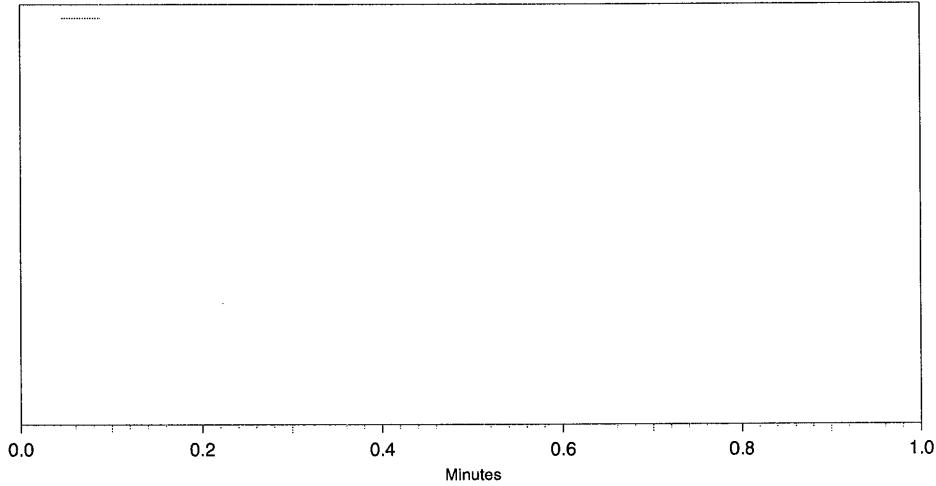

| Pk # | Retention Time | Area Percent | Lambda Max |
|------|----------------|--------------|------------|
|------|----------------|--------------|------------|

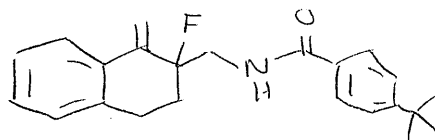

JW-08-16a

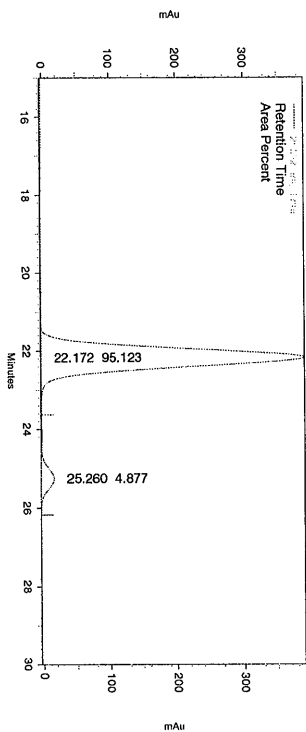

2: 252 nm, 4 nm

| PK # | Retention Time | Area Percent | Lambda Max |
|------|----------------|--------------|------------|
| 1    | 22.172         | 95.123       | 191        |
| 2    | 25.260         | 4.877        | 205        |

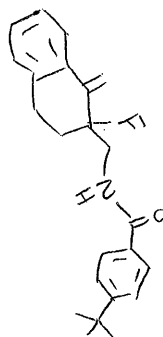



1H starting parameters (zg30)  
 DRX-500 TBIC  
 \*\*\*\*\*

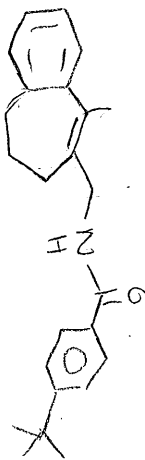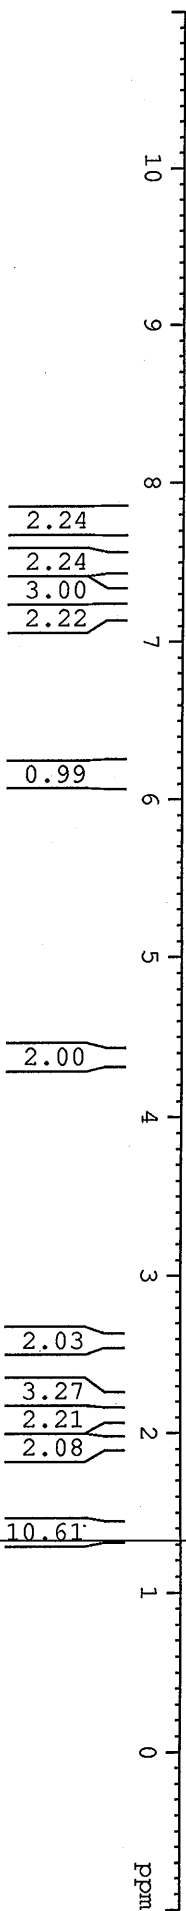

```

NAME      ymw-VI-100D-7amide
EXPNO     1
PROCNO    1
Date_     20120119
Time      15:08
INSTRUM   DRX-500
PROBHD    5 mm BBO BB-1H
PULPROG   zg30
TD         65536
SOLVENT   CDCl3
NS         8
DS         0
SWH        10000.000 Hz
FIDRES     0.152588 Hz
AQ         3.2768500 sec
RG         1149.4
DW         50.000 usec
DE         7.11 usec
TE         292.9 K
D1         1.00000000 sec
TD0        8

===== CHANNEL f1 =====
NUC1       1H
P1         25.00 usec
PL1        -5.00 dB
SFO1       499.9230870 MHz
SI         65536
SF         499.9200000 MHz
WDW        EM
SSB        0
LB         0.20 Hz
GB         0
PC         5.00
  
```

DRX-500 5mm TBIC probe 13C starting parameters. Rev 1/11/  
 With CPD proton decoupling. Use ns\*td0 scans

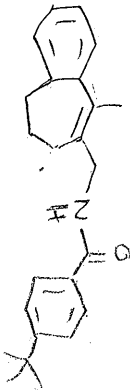

- 167.55
- 154.97
- 143.15
- 140.03
- 133.52
- 132.57
- 131.79
- 128.54
- 126.73
- 126.69
- 126.50
- 126.10
- 125.60

- 77.31
- 77.05
- 76.80

- 42.24
- 34.96
- 34.62
- 32.06
- 31.20
- 28.64
- 18.26

```

NAME Ymw-VI-100D-7amide
EXPNO 13
PROCNO 1
Date_ 20120119
Time 15.10
INSTRUM DRX-500
PROBHD 5 mm BBO BB-1H
PULPROG zgpg30
TD 292336
SOLVENT CDCl3
NS 256
DS 0
SWH 41322.312 Hz
FIDRES 0.630528 Hz
AQ 0.7930356 sec
RG 8192
DE 12.100 usec
DW 6.00 usec
TE 293.0 K
D1 0.03000000 sec
d11 0.03000000 sec
DELTA 2.90000010 sec
TD0 1000

===== CHANNEL f1 =====
NUC1 13C
P1 10.75 usec
PL1 0.00 dB
SFO1 125.7175545 MHz

===== CHANNEL f2 =====
CPDPRG2 waltz16
NUC2 1H
PCPD2 100.00 usec
PL2 -5.00 dB
PL12 7.04 dB
  
```

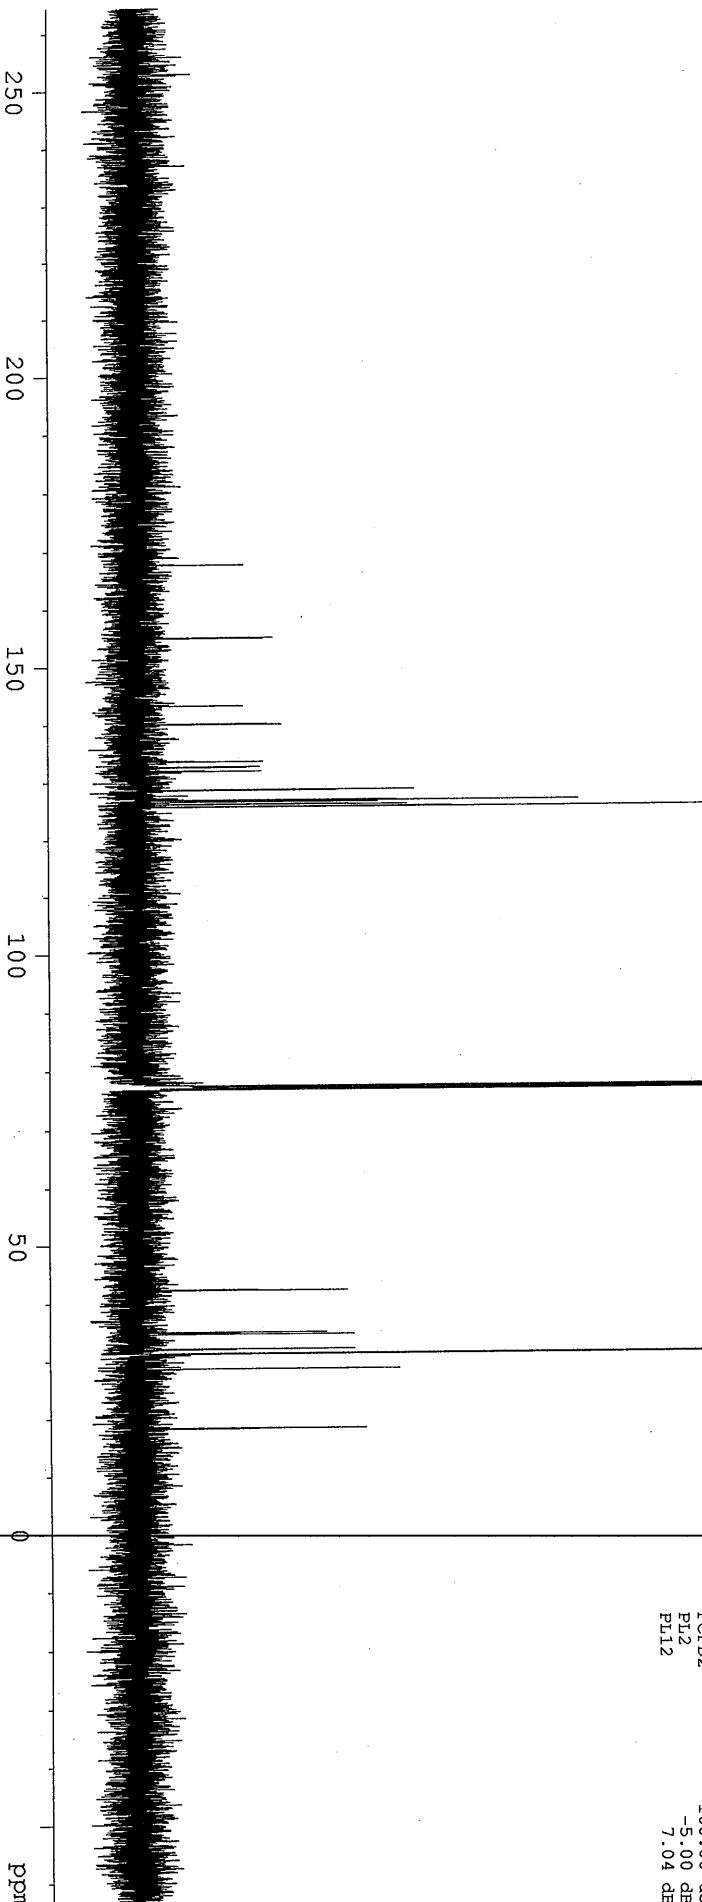

- 7.938
- 7.918
- 7.709
- 7.689
- 7.481
- 7.461
- 7.268
- 7.223
- 7.205
- 7.184
- 7.167
- 7.149
- 7.124
- 7.109
- 7.093
- 6.287
- 5.635
- 5.219
- 5.208
- 3.811
- 3.794
- 3.775
- 3.754
- 3.717
- 3.700
- 3.578
- 3.491
- 3.450
- 2.971
- 2.817
- 2.762
- 2.221
- 2.054
- 2.013
- 1.989
- 1.898
- 1.837
- 1.800
- 1.629
- 1.503
- 1.372
- 1.347
- 1.264
- 1.188
- 0.982
- 0.966
- 0.891

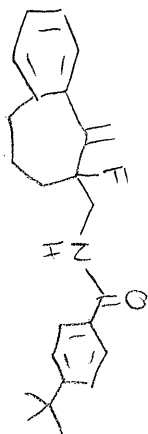

JW-08-42-P

|         |                |
|---------|----------------|
| NAME    | 1              |
| EXPNO   | 1              |
| PROCNO  | 1              |
| Date_   | 20120124       |
| Time    | 15.15          |
| INSTRUM | AVO-400        |
| PROBHD  | 5 mm QNP 1H/13 |
| PULPROG | zg30           |
| TD      | 65536          |
| SOLVENT | CDCl3          |
| NS      | 16             |
| DS      | 0              |
| SWH     | 8012.820 Hz    |
| FIDRES  | 0.122268 Hz    |
| AQ      | 4.0895586 sec  |
| RG      | 256            |
| DW      | 62.400 usec    |
| DE      | 6.00 usec      |
| TE      | 292.7 K        |
| D1      | 1.00000000 sec |
| TD0     | 2              |

==== CHANNEL f1 =====

|      |                 |
|------|-----------------|
| NUC1 | 1H              |
| P1   | 12.80 usec      |
| PL1  | 0.00 dB         |
| PL1W | 9.54516888 W    |
| SFO1 | 400.1324700 MHz |
| SI   | 65536           |
| SF   | 400.1300142 MHz |
| WDW  | EM              |
| SSB  | 0               |
| LB   | 0.30 Hz         |
| GB   | 0               |
| PC   | 4.00            |

- 2.131
- 2.347
- 4.447
- 0.989
- 1.000
- 1.005
- 1.146
- 1.356
- 2.217
- 1.420
- 2.561
- 1.773
- 1.484
- 11.076

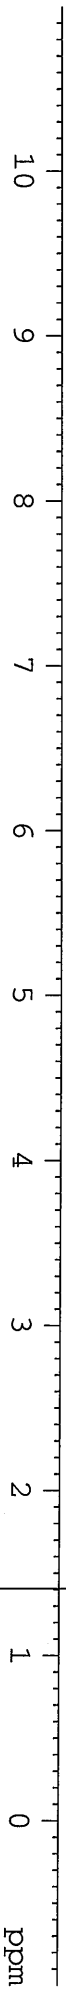

JW-08-124 AVB-400 ZBO Carbon Starting paramters 6/11/03 RN

```

NAME          JW-08-124
EXPNO         1
PROCNO        1
Date_         20120310
Time          16.39
INSTRUM       AVB-400
PROBHD        5 mm PABBO BB-
PULPROG       zgpg30
TD            65536
SOLVENT       CDCl3
NS            1601
DS            0
SWH           23980.814 Hz
FIDRES        0.365918 Hz
AQ            1.3664756 sec
RG            16384
DW            20.850 usec
DE            6.00 usec
TE            297.6 K
D1            1.50000000 sec
D11           0.03000000 sec
TD0           10000
  
```

```

===== CHANNEL f1 =====
NUC1          13C
P1            8.50 usec
PL1          -2.00 dB
PL1W         47.77286148 W
SFO1         100.6228298 MHz
  
```

```

===== CHANNEL f2 =====
CPDPRG2      waltz16
NUC2          1H
PCPD2        70.00 usec
PL2          -3.00 dB
PL12         16.00 dB
PL13         16.00 dB
PL12W        23.05461311 W
PL13W        0.29024038 W
SFO2         400.1316005 MHz
SI           32768
SF           100.6127690 MHz
WDW          EM
SSB          0
LB           1.50 Hz
GB           0
PC           1.60
  
```

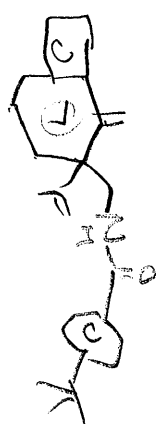

- 167.130
- 155.112
- 151.401
- 151.207
- 139.536
- 138.826
- 138.775
- 131.554
- 129.276
- 128.881
- 128.344
- 128.021
- 126.761
- 126.732
- 125.602
- 125.298
- 114.710
- 114.590
- 99.073
- 97.296
- 77.361
- 77.043
- 76.726
- 45.098
- 44.895
- 38.703
- 38.468
- 34.961
- 31.189
- 23.601
- 23.490

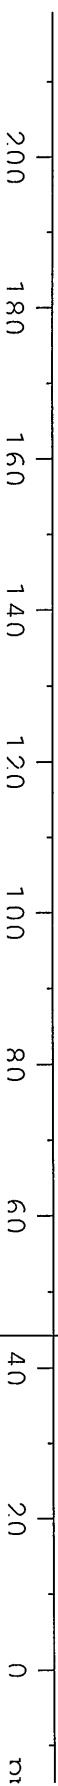

JW-08-42 AVQ-400 QNP Probe 19F starting parameters. (chemical shifts relative to CFCl3 at 0 ppm (082103 HV

| -147.23  
 | -149.15  
 \ -151.36  
 \ -151.42

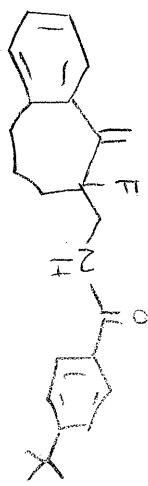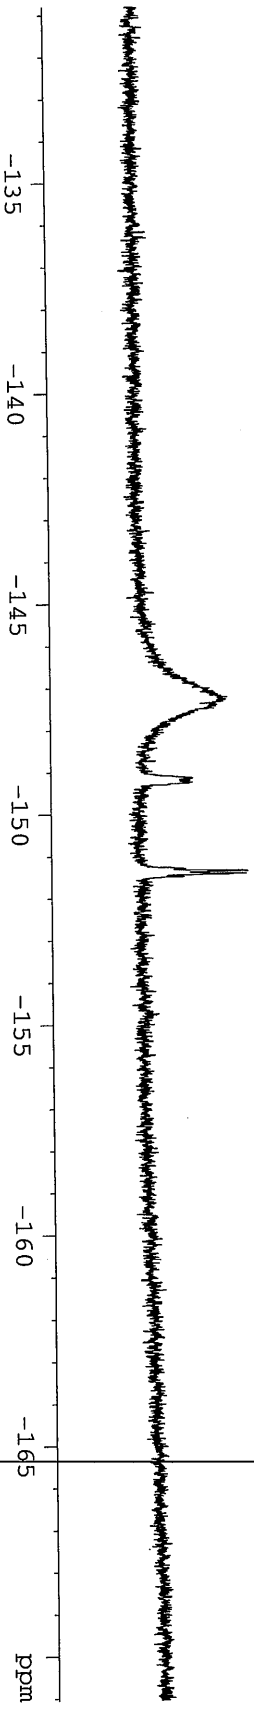

JW-08-42

|         |               |
|---------|---------------|
| NAME    | AVQ-4C        |
| EXPNO   | 15.1          |
| PROCNO  | 5             |
| Date_   | 2012012       |
| Time    | 15.1          |
| INSTRUM | AVQ-4C        |
| PROBHD  | 5 mm QNP 1H/1 |
| PULPROG | zgpg1g        |
| TD      | 13107         |
| SOLVENT | CDCl3         |
| NS      | 3             |
| DS      |               |
| SWH     | 90090.05      |
| FIDRES  | 0.68733       |
| AQ      | 0.727505      |
| RG      | 5160.         |
| DW      | 5.55          |
| DE      | 6.0           |
| TE      | 292.          |
| D1      | 1.0000000     |
| TD0     |               |

==== CHANNEL F1 ==

|      |            |
|------|------------|
| NUC1 | 15         |
| P1   | 16.0       |
| PL1  | -3.0       |
| PL1W | 20.0474891 |
| SFO1 | 376.460704 |
| SI   | 6553       |
| SF   | 376.498073 |
| WDW  | E          |
| SSB  |            |
| LB   | 2.0        |
| GB   |            |
| PC   | 4.0        |

JM-08-42-rac (ad)

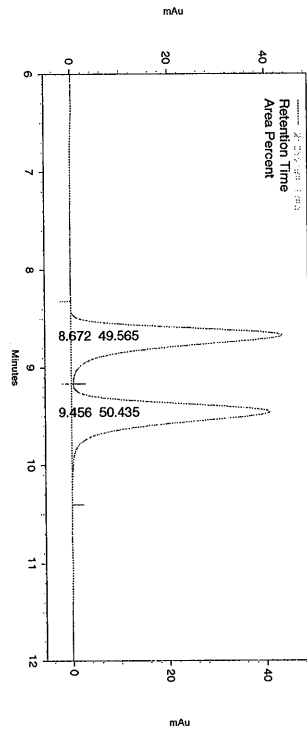

2: 255 nm, 4 nm

Results

| PK # | Retention Time | Area Percent | Lambda Max |
|------|----------------|--------------|------------|
| 1    | 8.672          | 49.565       | 205        |
| 2    | 9.456          | 50.435       | 205        |

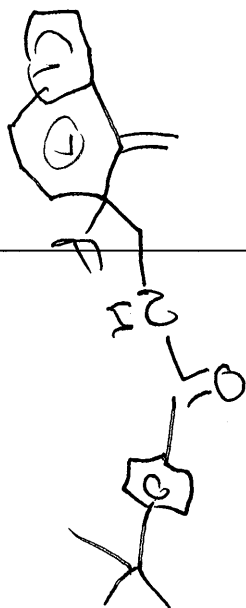

JW-08-124 IB9505\_15

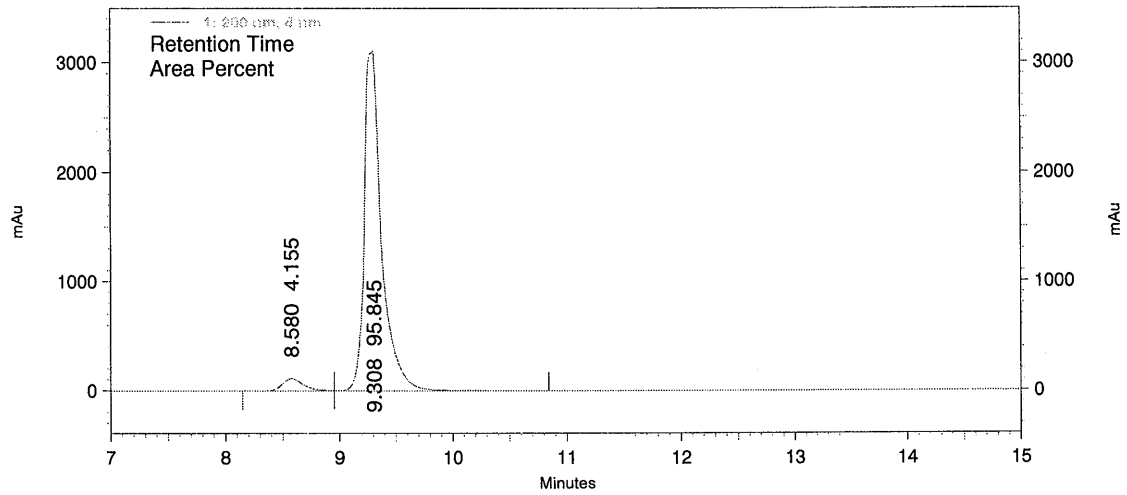

1: 200 nm, 4 nm

Results

| Pk # | Retention Time | Area Percent | Lambda Max |
|------|----------------|--------------|------------|
| 1    | 8.580          | 4.155        | 205        |
| 2    | 9.308          | 95.845       | 202        |

```

NAME          JW-08-20VC
EXPNO         1
PROCNO        1
Date_         20120505
Time_         14.43
INSTRUM       AVO-400
PROBHD        5 mm QNP 1H/13
PULPROG       zg30
TD            65536
SOLVENT       CDCl3
NS            16
DS            0
SWH           8012.820 Hz
FIDRES        0.122286 Hz
AQ            4.089386 sec
RG            161.3
DW            62.400 usec
DE            6.00 usec
TE            295.8 K
D1            1.00000000 sec
TD0           4

===== CHANNEL f1 =====
NUC1          1H
P1            12.80 usec
PL1           0.00 dB
PL1W          9.54516888 W
SF01          400.1324700 MHz
SI            32
SF            400.1300142 MHz
WDW           EM
SSB           0
LB            0.30 Hz
GB            0
PC            4.00

```

- 7.735
- 7.714
- 7.448
- 7.427
- 7.412
- 7.394
- 7.318
- 7.308
- 7.268
- 7.216
- 7.206
- 7.197
- 7.188
- 7.177
- 6.318
  
- 4.523
- 4.510
  
- 3.426
- 3.061
  
- 2.171
- 1.789
- 1.490
- 1.335
- 1.176

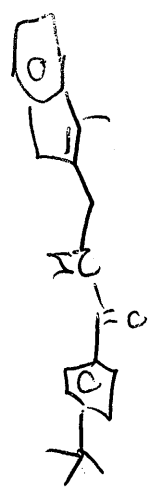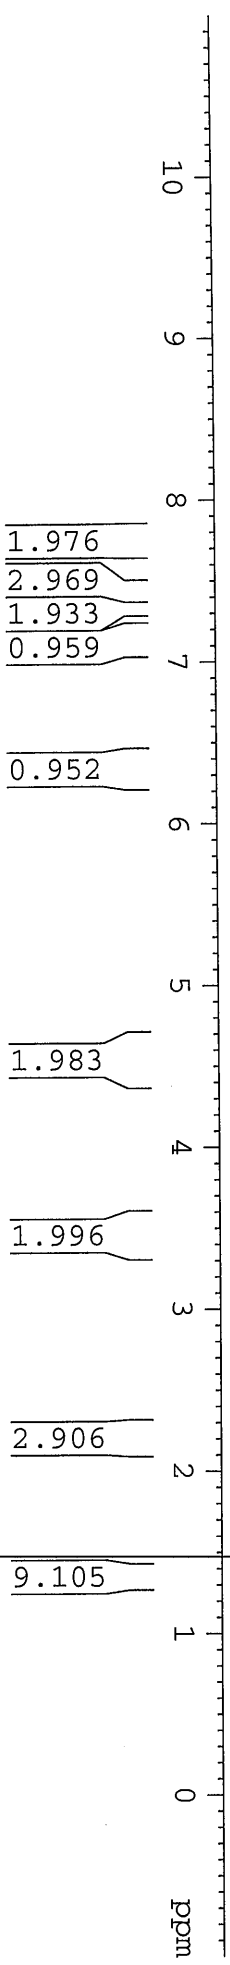



NAME JW-08-20 Ccarb

EXPNO 1  
PROCNO 1  
Date\_ 20120505  
Time 14.45  
INSTRUM AVQ-400  
PROBHD 5 mm QNP 1H/13  
PULPROG zgpg30  
TD 65536  
SOLVENT CDCl3  
NS 170  
DS 0  
SWH 24038.461 Hz  
FIDRES 0.366798 Hz  
AQ 1.3632196 sec  
RG 16384  
DW 20.800 usec  
DE 6.00 usec  
TE 295.9 K  
D1 2.0000000 sec  
D11 0.0300000 sec  
TD0 1000

==== CHANNEL F1 =====  
NUC1 13C  
P1 8.50 usec  
PL1 -2.00 dB  
PL1W 47.77286148 W  
SFO1 100.6228298 MHz

==== CHANNEL F2 =====  
CPDPRG2 waltz16  
NUC2 1H  
PCPD2 70.00 usec  
PL2 0.00 dB  
PL12 15.00 dB  
PL13 17.00 dB  
PL2W 9.54516888 W  
PL12W 0.30184472 W  
PL13W 0.19045115 W  
SFO2 400.1316000 MHz  
SI 32768  
SF 100.6127755 MHz  
WDW EM  
SSB 0  
LB 1.50 Hz  
GB 0  
PC 1.40

- 167.29
- 154.99
- 146.35
- 142.47
- 137.34
- 136.20
- 131.51
- 126.72
- 126.27
- 125.49
- 124.80
- 123.42
- 118.89
  
- 77.32
- 77.00
- 76.69
  
- 39.59
- 37.51
- 34.88
- 31.12
  
- 10.38

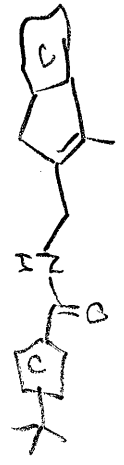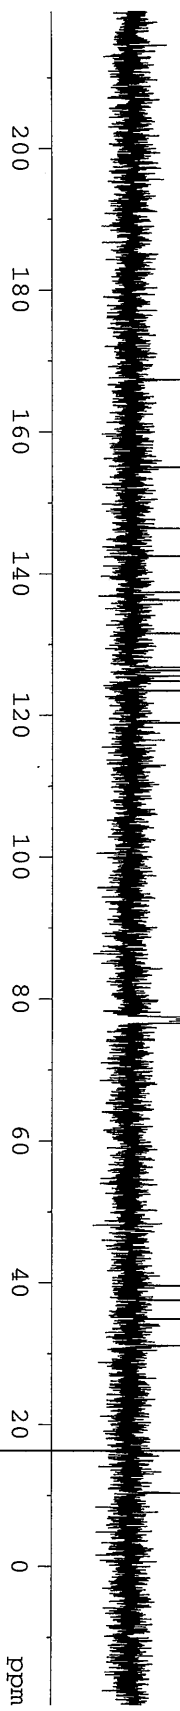

```

NAME          JW-08-12-2
EXPNO         1
PROCNO        1
Date_         20120104
Time         10.00
INSTRUM       AVO-400
PROBHD        5 mm QNP 1H/13
PULPROG       zgpg30
TD            65536
SOLVENT       CDCl3
NS            16
DS            0
SWH           8012.820 Hz
FIDRES        0.122266 Hz
AQ           4.0895586 sec
RG            362
DM           62.400 usec
DE           6.00 usec
TE           293.0 K
D1           1.00000000 sec
TD0           2

===== CHANNEL f1 =====
NUC1          1H
P1           12.80 usec
PL           0.00 dB
PL1W         9.54516888 W
SFO1         400.1324700 MHz
SI           65536
SF           400.1300142 MHz
WDW          EM
SSB          0
LB           0.30 Hz
GB           0
PC           4.00

```

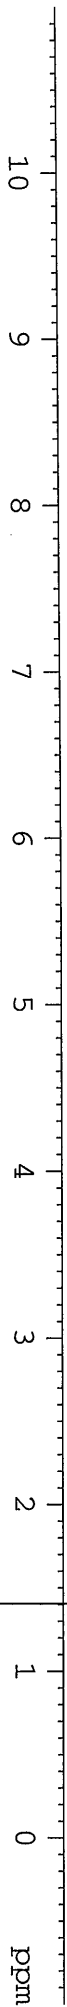

- 7.723
- 7.703
- 7.528
- 7.510
- 7.482
- 7.462
- 7.269
- 7.235
- 6.476
- 5.786
- 5.776
- 5.439
- 4.160
- 4.139
- 4.123
- 4.104
- 4.071
- 4.055
- 4.036
- 3.789
- 3.754
- 3.719
- 3.417
- 3.376
- 3.339
- 3.317
- 3.274
- 3.253
- 3.209
- 2.182
- 1.599
- 1.503
- 1.348
- 1.271
- 1.189
- 0.982
- 0.966
- 0.891

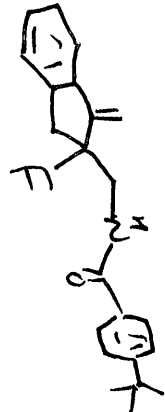

- 2.175
- 3.120
- 4.419
- 1.131
- 0.999
- 1.001
- 1.091
- 1.072
- 2.144
- 9.122

125 AVB-400 ZBO Carbon Starting parameters 6/11/03 RN

167.61  
 155.31  
 149.23  
 149.06  
 140.70  
 140.67  
 137.89  
 137.86  
 131.31  
 129.70  
 127.42  
 126.85  
 125.62  
 125.46  
 121.13  
 107.66  
 107.60  
 102.65  
 100.84  
 77.37  
 77.05  
 76.74  
 46.07  
 45.79  
 40.84  
 40.60  
 34.98  
 31.18

```

NAME                JW-08-125
EXPNO                1
PROCNO              1
Date_              20120310
Time              18.00
INSTRUM            AVB-400
PROBHD             5 mm PABBO BB-
PULPROG            zgpg30
TD                 65536
SOLVENT            CDCl3
NS                 497
DS                 0
SWH                23980.814 Hz
FIDRES            0.365918 Hz
AQ                1.3664756 sec
RG                16384
DE                20.850 usec
TE                297.7 K
D1                1.50000000 sec
D11               0.03000000 sec
TD0               10000

===== CHANNEL F1 =====
NUC1               13C
P1                 8.50 usec
PL1               -2.00 dB
PL1W              47.77286148 W
SFO1              100.6228298 MHz

===== CHANNEL F2 =====
CPDPRG2           waltz16
NUC2              1H
PCPD2            70.00 usec
PL2              -3.00 dB
PL12             16.00 dB
  
```

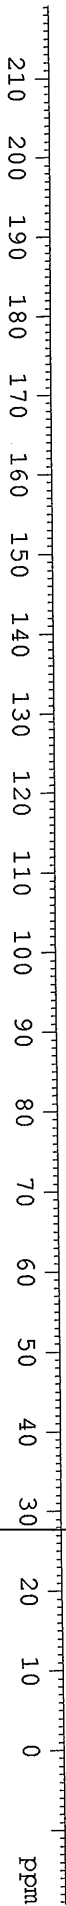

100 QNP Probe 19F starting parameters. (revised)  
 ical shifts relative to CFCl3 at 0 ppm (082103)

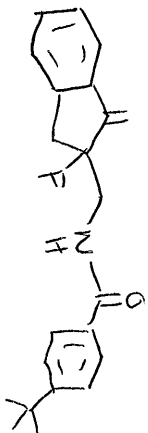

1444.78  
 1444.81

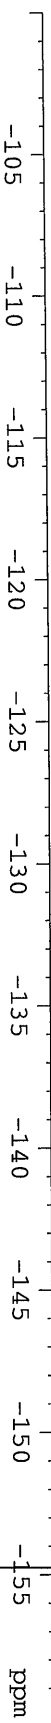

|         |                |
|---------|----------------|
| NAME    | JW-08-12-2F    |
| EXPNO   | 1              |
| PROCNO  | 1              |
| Date_   | 20120104       |
| Time    | 10.03          |
| INSTRUM | AVO-400        |
| PROBHD  | 5 mm QNP 1H/13 |
| PULPROG | zgpg30         |
| TD      | 131072         |
| SOLVENT | CDCl3          |
| NS      | 8              |
| DS      | 0              |
| SWH     | 90090.094 Hz   |
| FIDRES  | 0.68733 Hz     |
| AQ      | 0.727551 sec   |
| RG      | 4096           |
| DW      | 5.550 usec     |
| DE      | 6.00 usec      |
| TE      | 292.9 K        |
| D1      | 1.00000000 sec |
| TD0     | 1              |

  

|       |                 |       |
|-------|-----------------|-------|
| ===== | CHANNEL F1      | ===== |
| NUC1  | 19F             |       |
| P1    | 16.00 usec      |       |
| PL1   | -3.00 dB        |       |
| PR1W  | 20.04748917 W   |       |
| SFO1  | 376.4607042 MHz |       |
| SF    | 65536           |       |
| WDW   | EM              |       |
| SSB   | 0               |       |
| LB    | 2.00 Hz         |       |
| GB    | 0               |       |
| PC    | 4.00            |       |

JW-08-31

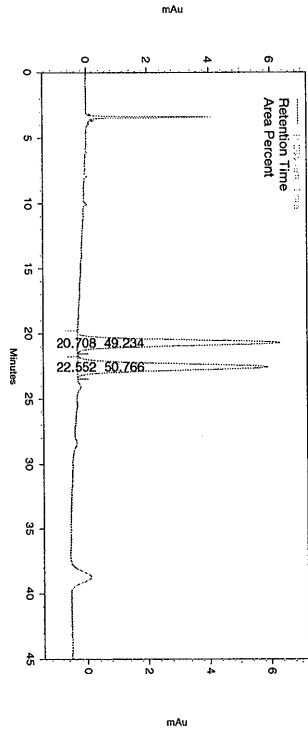

1: 285 nm, 4 nm

Results

| PK # | Retention Time | Area Percent | Lambda Max |
|------|----------------|--------------|------------|
| 1    | 20.708         | 49.234       | 205        |
| 2    | 22.552         | 50.766       | 205        |

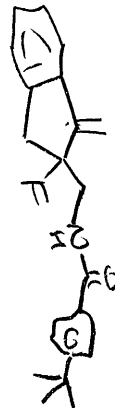

JW-08-31

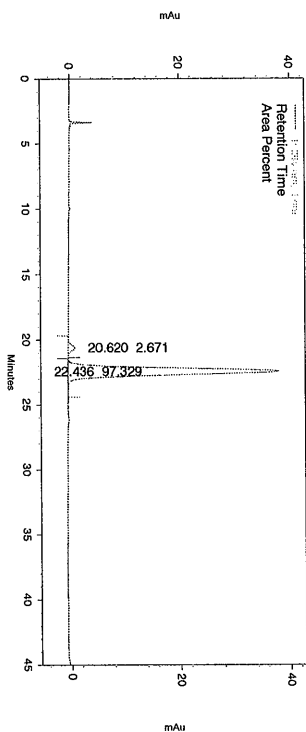

1: 285 nm, 4 nm

Results

| pk # | Retention Time | Area Percent | Lambda Max |
|------|----------------|--------------|------------|
| 1    | 20.620         | 2.671        | 205        |
| 2    | 22.436         | 97.329       | 204        |

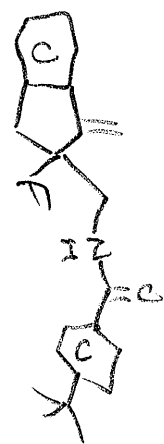

JW\_07-159NO2 AV-500 new TBI (HXP) probe  
 1D 1H starting parameters

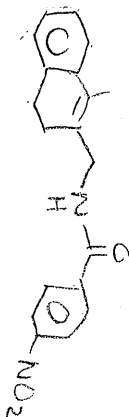

|       |       |       |       |       |       |       |       |       |       |       |       |       |       |       |       |       |       |       |       |       |       |       |       |       |       |       |       |       |       |       |       |       |       |       |       |       |       |       |       |       |       |       |       |       |       |       |       |       |       |       |       |       |       |       |       |       |       |       |       |       |       |       |       |
|-------|-------|-------|-------|-------|-------|-------|-------|-------|-------|-------|-------|-------|-------|-------|-------|-------|-------|-------|-------|-------|-------|-------|-------|-------|-------|-------|-------|-------|-------|-------|-------|-------|-------|-------|-------|-------|-------|-------|-------|-------|-------|-------|-------|-------|-------|-------|-------|-------|-------|-------|-------|-------|-------|-------|-------|-------|-------|-------|-------|-------|-------|-------|-------|
| 8.331 | 8.312 | 8.307 | 8.303 | 8.293 | 8.289 | 8.285 | 8.003 | 7.986 | 7.965 | 7.961 | 7.957 | 7.947 | 7.943 | 7.938 | 7.336 | 7.321 | 7.279 | 7.264 | 7.261 | 7.249 | 7.247 | 7.234 | 7.231 | 7.204 | 7.201 | 7.189 | 7.186 | 7.174 | 7.172 | 7.158 | 7.144 | 6.415 | 6.228 | 4.378 | 4.367 | 4.279 | 4.267 | 4.156 | 4.142 | 4.127 | 4.113 | 2.890 | 2.874 | 2.858 | 2.806 | 2.790 | 2.774 | 2.378 | 2.365 | 2.350 | 2.187 | 2.184 | 2.062 | 1.625 | 1.289 | 1.285 | 1.275 | 1.260 | 0.951 | 0.913 | 0.899 | 0.885 | 0.873 |
|-------|-------|-------|-------|-------|-------|-------|-------|-------|-------|-------|-------|-------|-------|-------|-------|-------|-------|-------|-------|-------|-------|-------|-------|-------|-------|-------|-------|-------|-------|-------|-------|-------|-------|-------|-------|-------|-------|-------|-------|-------|-------|-------|-------|-------|-------|-------|-------|-------|-------|-------|-------|-------|-------|-------|-------|-------|-------|-------|-------|-------|-------|-------|-------|

```

===== CHANNEL f1 =====
NUC1      1H
PI        7.30 usec
PL1       0.00 dB
PL1W     12.55943203 W
SFO1     500.2330889 MHz
SI        65536
SF       500.2300165 MHz
WDW       EM
SSB       0
LB        0.30 Hz
GB        0
FC        4.00
=====
Date_     20111116
Time     13.45
INSTRUM  AV-500
PROBHD   5 mm TBI 1H/31
PULPROG  zg30
TD       65536
SOLVENT  CDCl3
NS       16
DS       0
SWH      10330.578 Hz
FIDRES   0.157632 Hz
AQ       3.1719923 sec
RG       181
DE       48.400 usec
TE       292.4 K
D1       0.10000000 sec
TD0      2
  
```

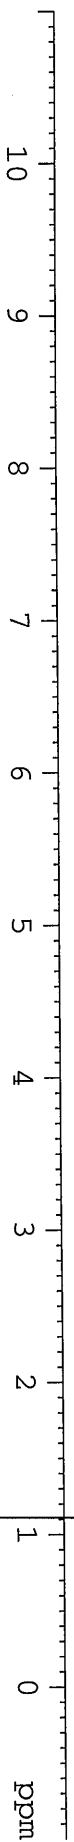

|       |       |       |       |       |       |       |       |       |       |       |       |
|-------|-------|-------|-------|-------|-------|-------|-------|-------|-------|-------|-------|
| 2.138 | 2.045 | 1.186 | 2.950 | 0.954 | 2.000 | 1.974 | 2.192 | 3.111 | 0.427 | 1.347 | 0.946 |
|-------|-------|-------|-------|-------|-------|-------|-------|-------|-------|-------|-------|

JW-07-nitro substrate AVB-400 ZBO Carbon Starting paramt

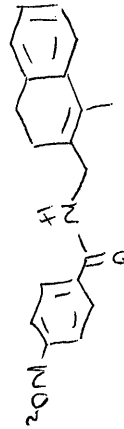

- 165.68
- 149.58
- 140.08
- 136.05
- 135.66
- 130.74
- 130.02
- 128.16
- 127.28
- 127.00
- 126.56
- 123.84
- 123.39

- 77.38
- 77.06
- 76.75

- 42.74

- 28.43
- 27.06

- 14.32

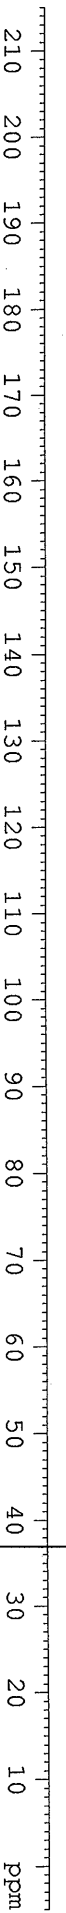

```

NAME          JW-07-nitrosubstrate
EXPNO         1
PROCNO        1
Date_         20120112
Time          11.50
INSTRUM       5 mm PABBO BB-
PROBHD        zgpg30
PULPROG       zgpg30
TD            65536
SOLVENT       CDCl3
NS            131
DS            0
SWH           23980.814 Hz
FIDRES        0.365918 Hz
AQ            1.3664756 sec
RG            16384
DW            20.850 usec
DE            6.00 usec
TE            297.9 K
D1            1.50000000 sec
D11           0.03000000 sec
TD0           100

===== CHANNEL f1 =====
NUC1          13C
P1            8.50 usec
PL1           -2.00 dB
PL1W          47.77286148 W
SFO1          100.6228298 MHz

===== CHANNEL f2 =====
CPDPRG2      waltz16
NUC2          1H
PCPD2        70.00 usec
PL2           -3.00 dB
PL12         16.00 dB
  
```



```

NAME          JW-07-167p1
EXENO         1
PROCNO        1
Date_         20111118
Time_         16.47
INSTRUM       5 mm QNP 1H/13
PROBHD        AVO-400
PULPROG       zg30
TD            65536
SOLVENT       CDCl3
NS            16
DS            0
SWH           8012.820 Hz
FIDRES        0.12286 Hz
AQ            4.089586 sec
RG            362
DW            62.400 usec
DE            6.00 usec
TE            293.3 K
D1            1.00000000 sec
TD0           2

===== CHANNEL f1 =====
NUC1          1H
P1            12.80 usec
PL1           0.00 db
PL1W          9.54516888 W
SFO1          400.1324700 MHz
SI            65536
SF            400.1300142 MHz
WDW           EM
SSB           0
LB            0.30 Hz
GB            0
PC            4.00

```

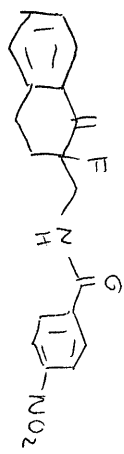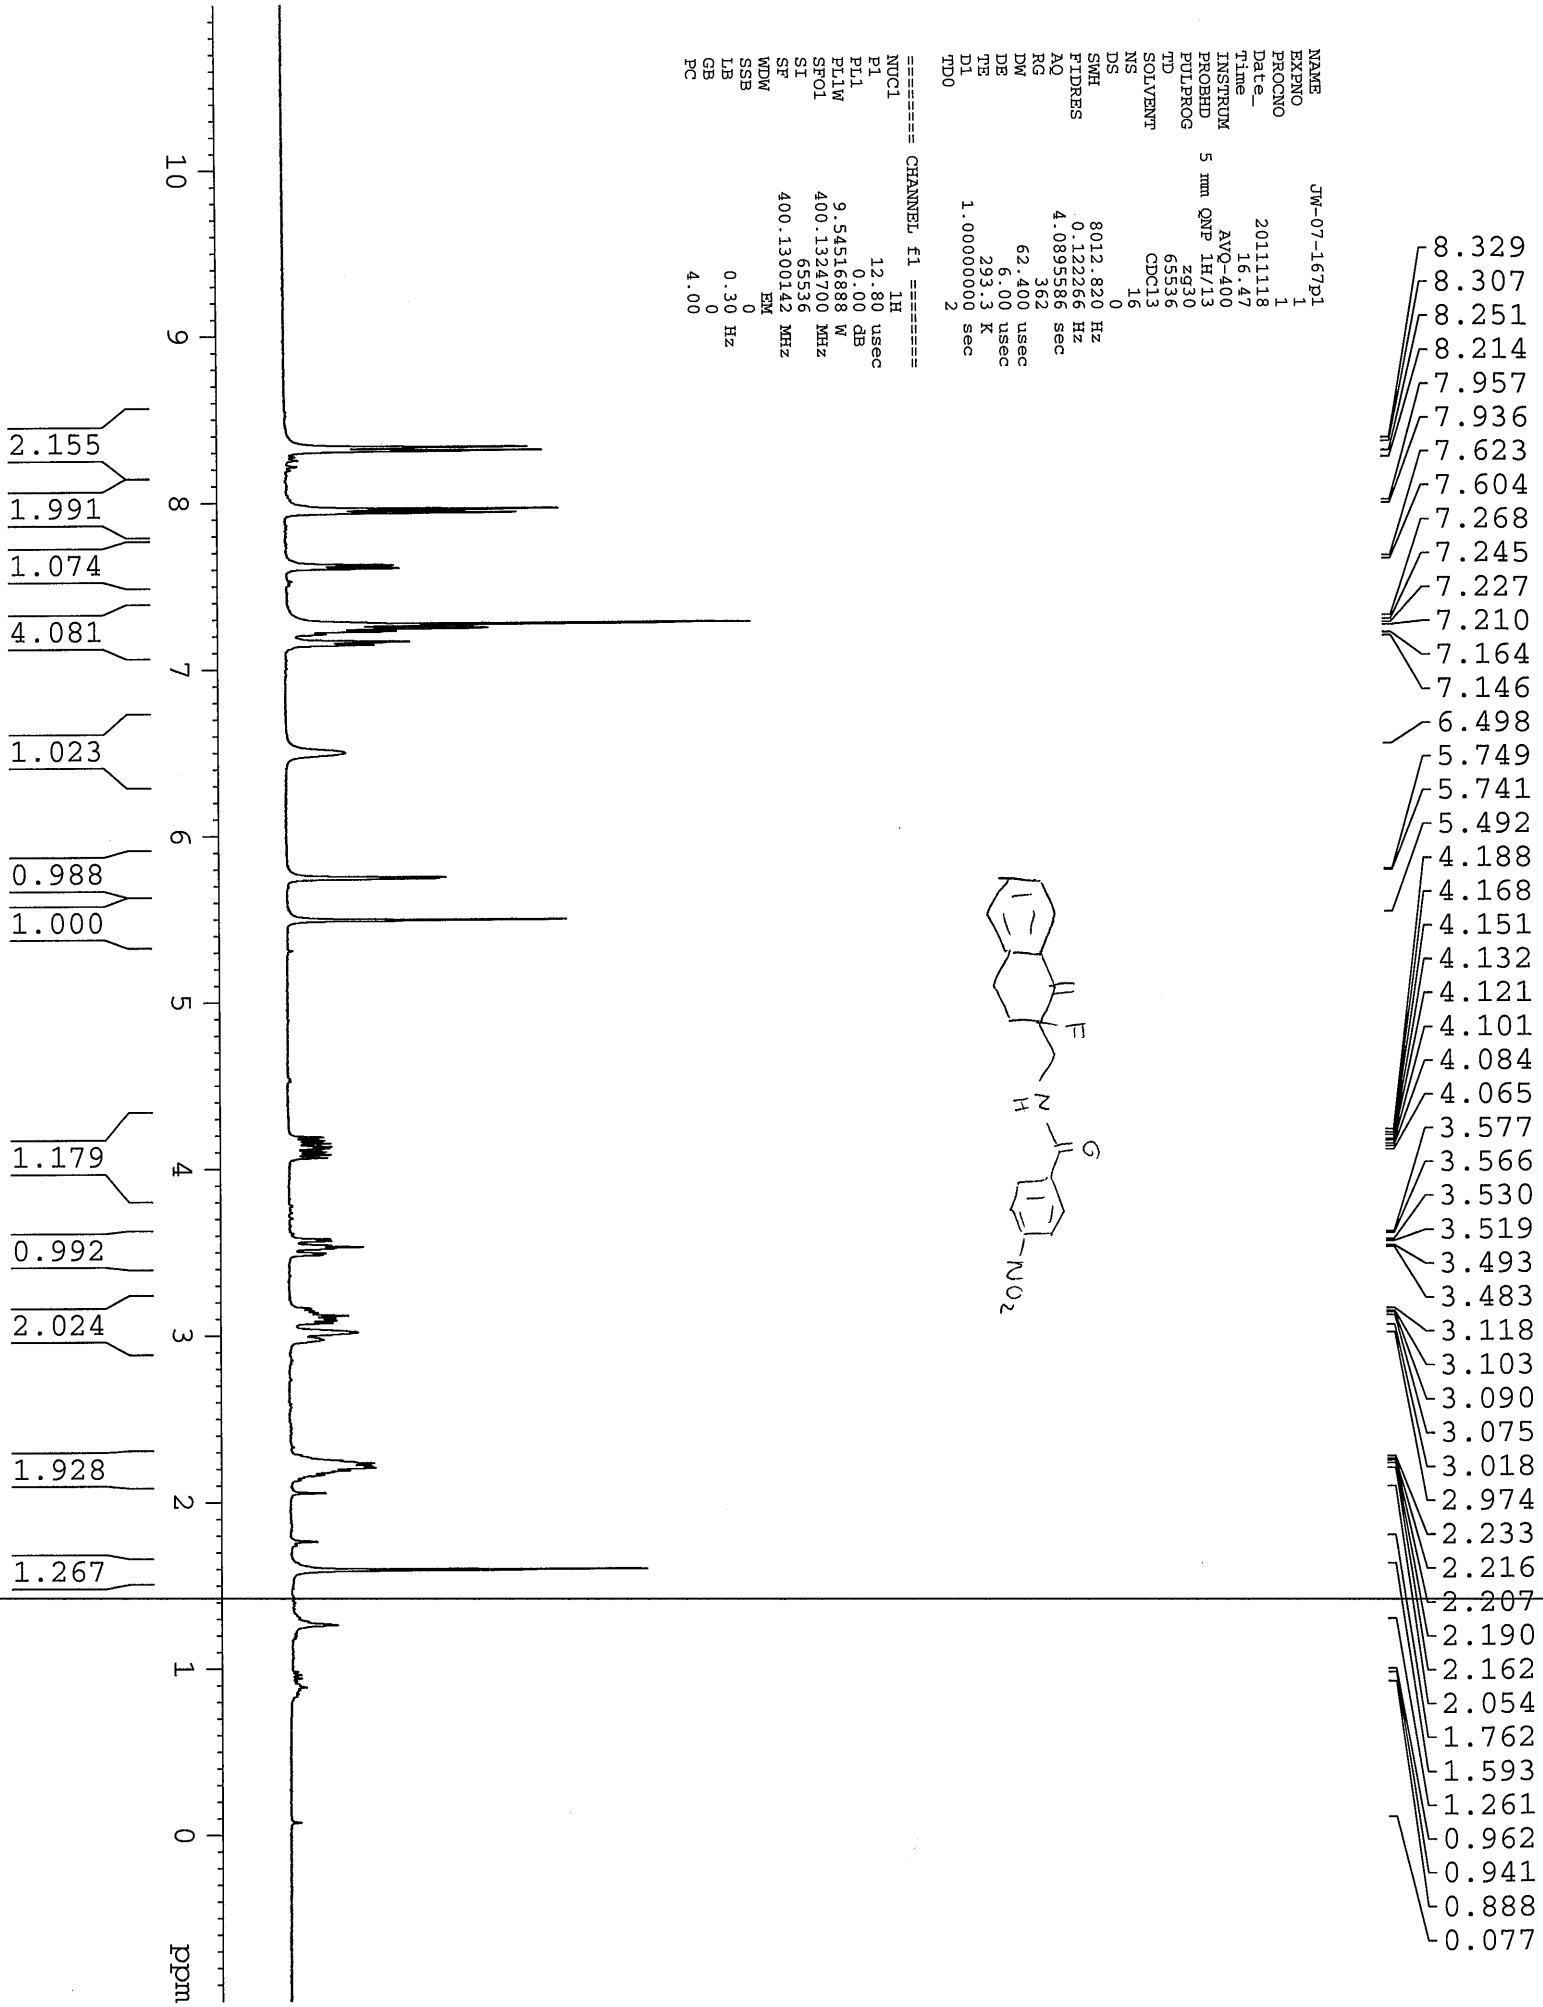

DRX-500 5mm TBIC probe 13C starting parameters. Rev. 1/11/12  
 With CPD proton decoupling. Use ns\*td0 scans

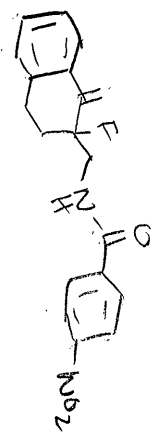

- 165.51
- 149.74
- 143.67
- 143.54
- 139.79
- 134.60
- 132.35
- 132.32
- 128.97
- 128.61
- 128.22
- 126.71
- 124.92
- 123.97
- 109.23
- 109.14
- 96.89
- 95.45
- 77.31
- 77.05
- 76.80
- 45.10
- 44.91
- 30.67
- 30.50
- 26.96
- 26.88

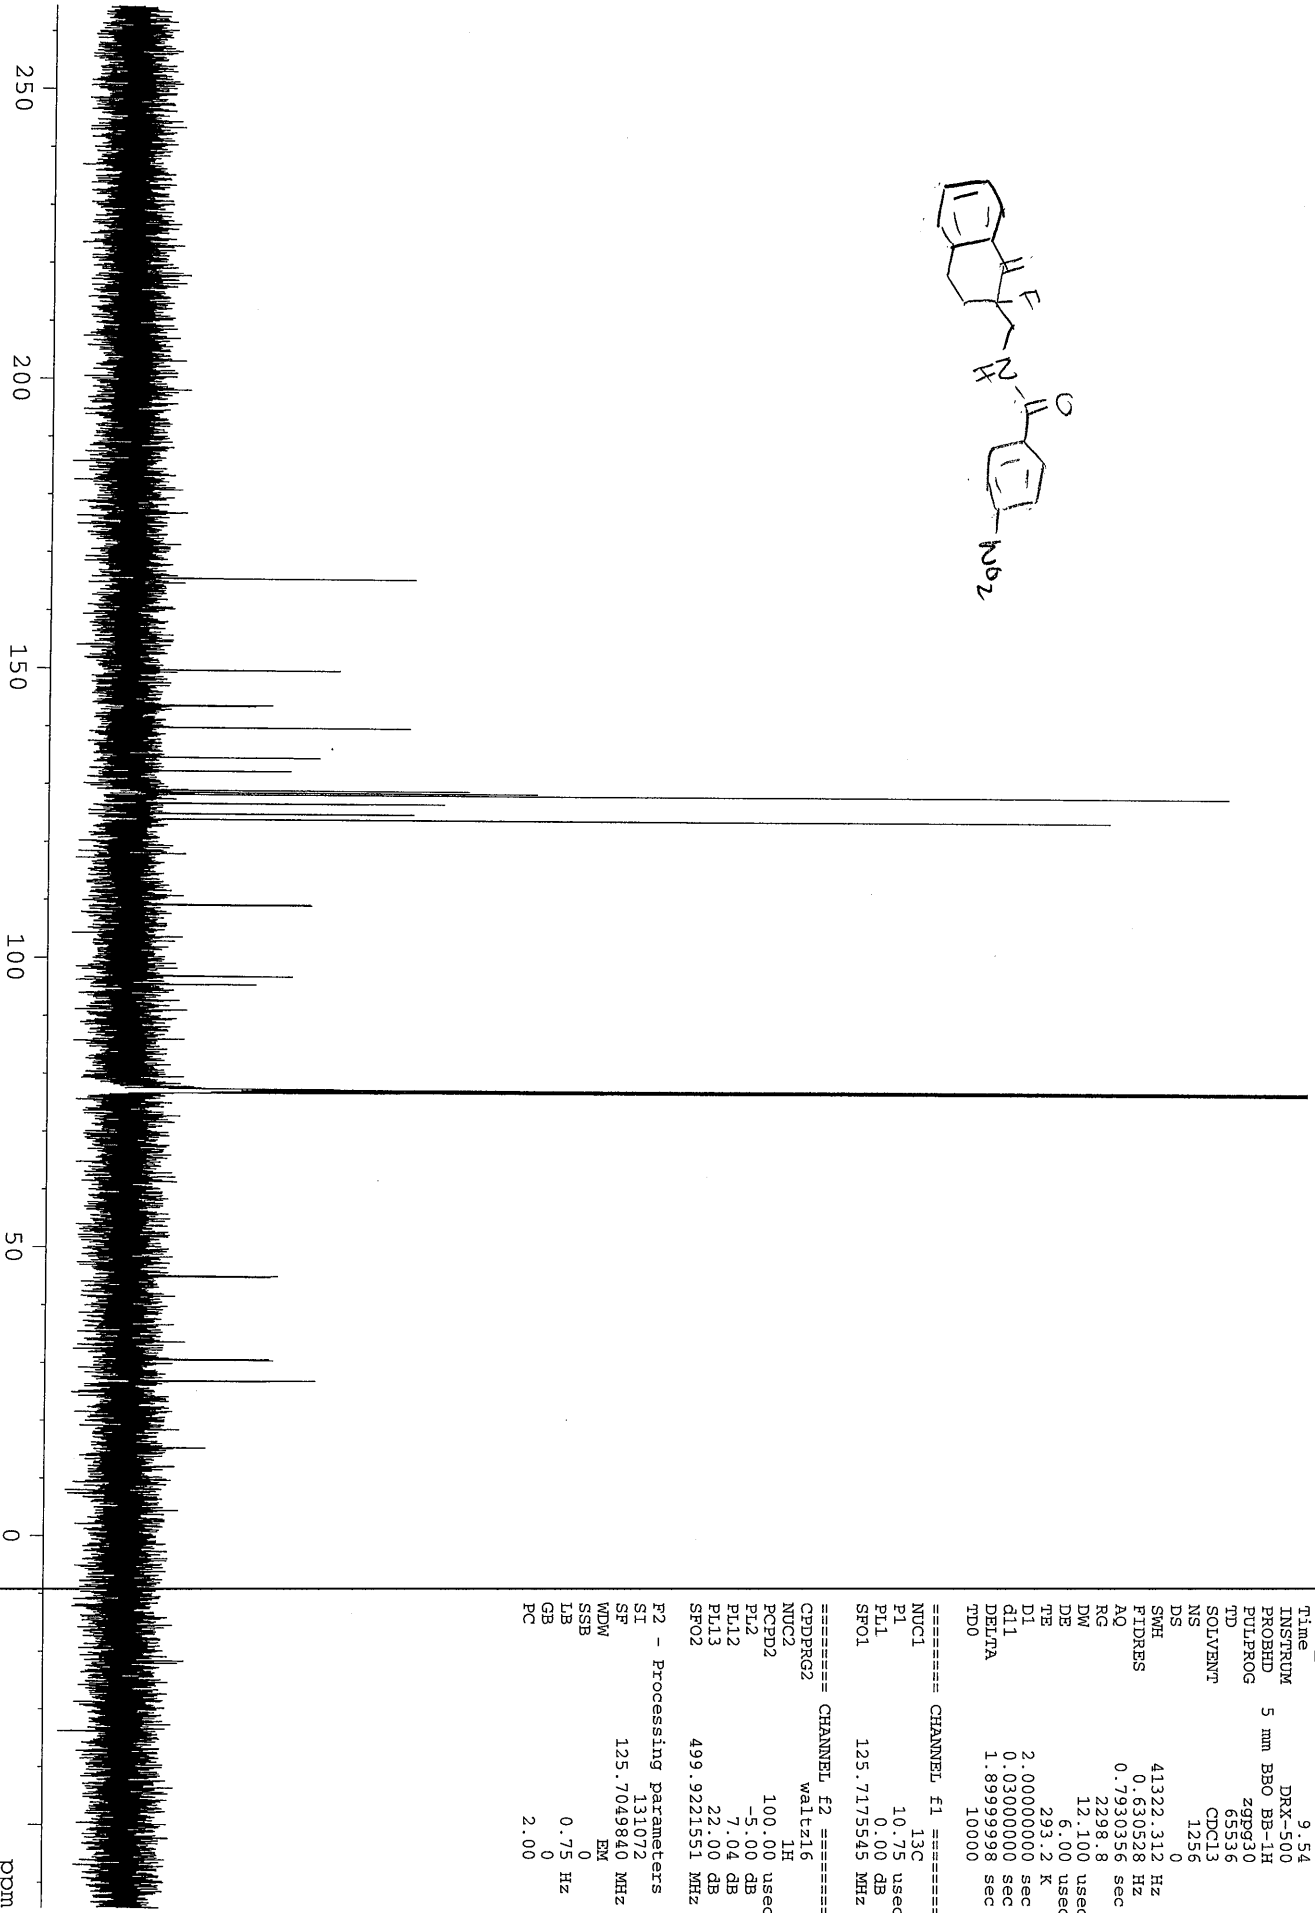

Current Data Parameters  
 NAME AD-II-nitro\_Product3  
 EXPNO 1  
 PROCNO 1

F2 - Acquisition Parameters  
 Date\_ 20120203  
 Time\_ 9:54

INSTRUM DRX-500  
 PROBHD 5 mm BBO BB-1H  
 PULPROG zgpg30  
 TD 65536  
 SOLVENT CDCl3  
 NS 1256  
 DS 0

SWH 41322.312 Hz  
 FIDRES 0.630528 Hz  
 AQ 0.7930356 sec  
 RG 2298.8  
 DM 12.100 usec  
 DE 6.00 usec  
 TE 293.2 K

D1 2.00000000 sec  
 d11 0.03000000 sec  
 DELTA 1.89999998 sec  
 TD0 10000

==== CHANNEL f1 =====  
 NUC1 13C  
 P1 10.75 usec  
 PL1 0.00 dB  
 SFO1 125.7175545 MHz

==== CHANNEL f2 =====  
 CPDPRG2 waltz16  
 NUC2 1H  
 PCPD2 100.00 usec  
 PL2 -5.00 dB  
 PL12 7.04 dB  
 PL13 22.00 dB  
 SFO2 499.9221551 MHz

F2 - Processing parameters  
 SI 131072  
 SF 125.7049840 MHz  
 MWDW EM  
 SSB 0  
 LB 0.75 Hz  
 GB 0  
 PC 2.00

ppm

00 QNP Probe 19F starting parameters. (revised)  
 ical shifts relative to CFCl3 at 0 ppm (082103)

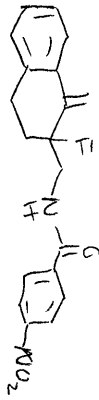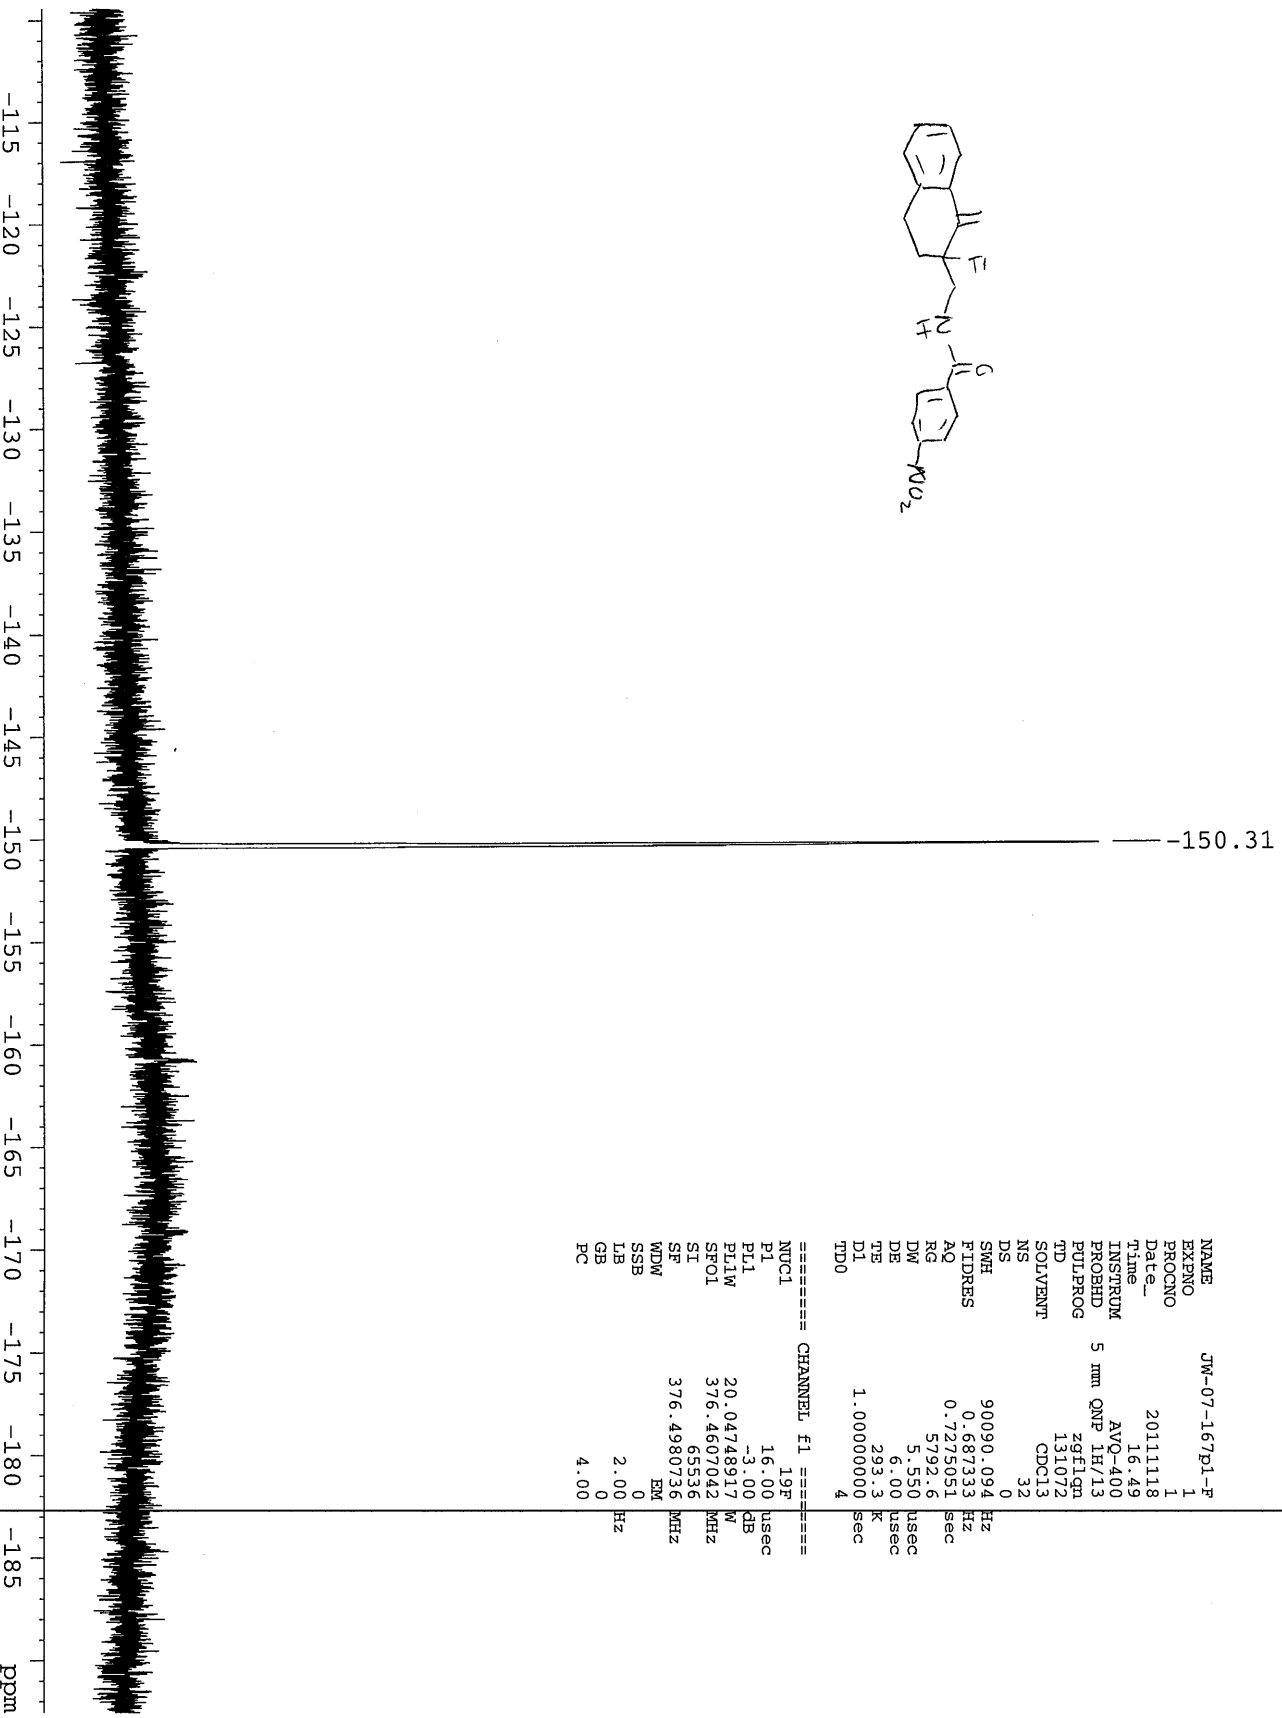

```

NAME          JW-07-167p1-F
EXPNO         1
PROCNO        1
Date_         20111118
Time_         16.49
INSTRUM       AVO-400
PROBHD        5 mm QNP 1H/13
PULPROG       zgpg30
TD            131072
SOLVENT       CDCl3
NS            32
DS            0
SMH           90090.094 Hz
FIDRES        0.687333 Hz
AQ            0.7275051 sec
RG            5792.16
DW            5.550 usec
DE            6.00 usec
TE            293.3 K
D1            1.00000000 sec
TD0           4

===== CHANNEL f1 =====
NUC1          19F
P1            16.00 usec
PL1           -3.00 dB
PL1W          20.04748917 W
SFO1          376.4607042 MHz
SI            65536
SF            376.4980736 MHz
WDW           EM
SSB           0
LB            2.00 Hz
GB            0
PC            4.00
  
```

JW-08-35p

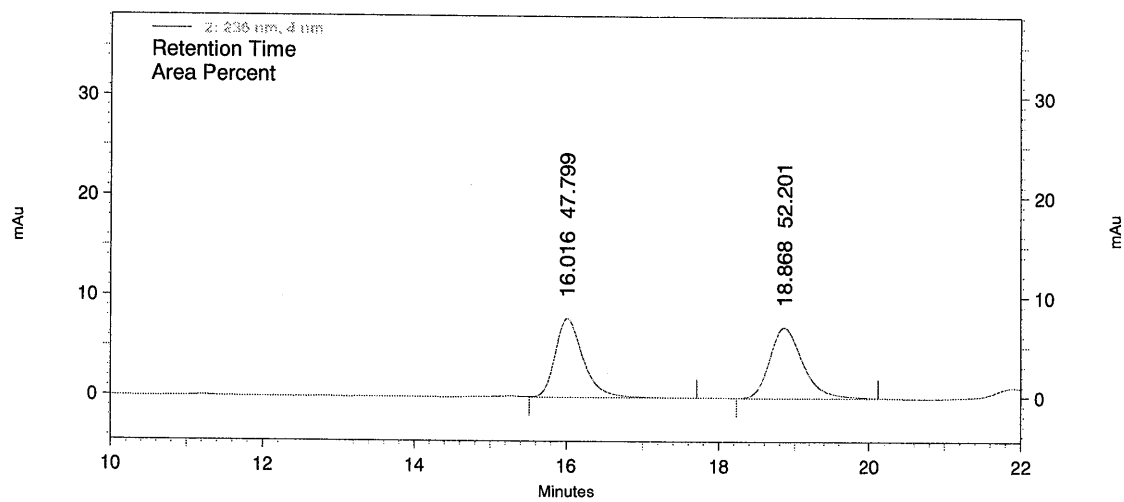

2: 236 nm, 4 nm  
Results

| Pk # | Retention Time | Area Percent | Lambda Max |
|------|----------------|--------------|------------|
| 1    | 16.016         | 47.799       | 208        |
| 2    | 18.868         | 52.201       | 208        |

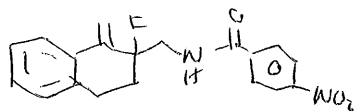

JW-08-35p

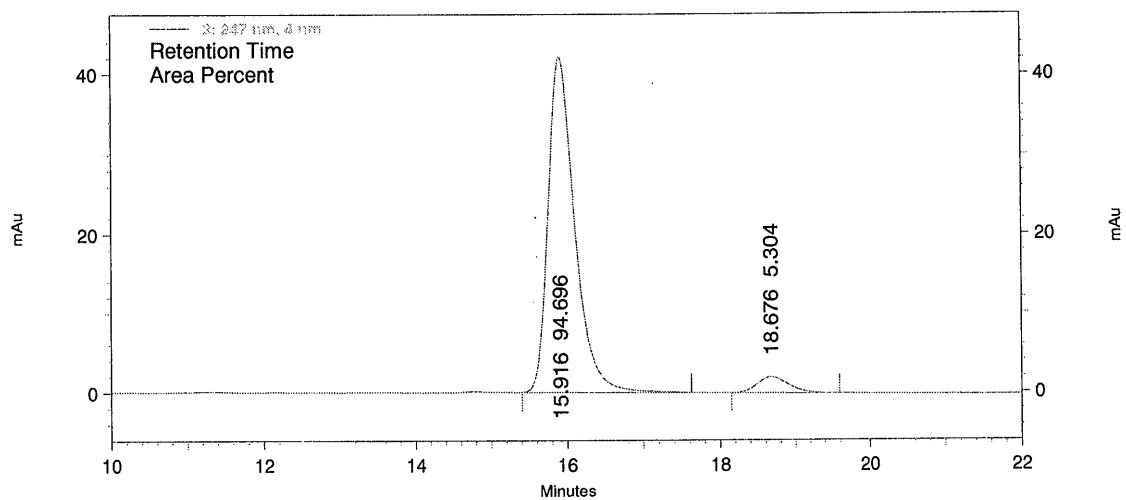

3: 247 nm, 4 nm

Results

| Pk # | Retention Time | Area Percent | Lambda Max |
|------|----------------|--------------|------------|
| 1    | 15.916         | 94.696       | 208        |
| 2    | 18.676         | 5.304        | 206        |

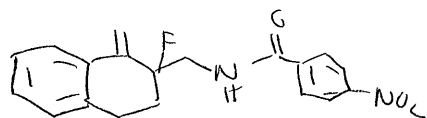

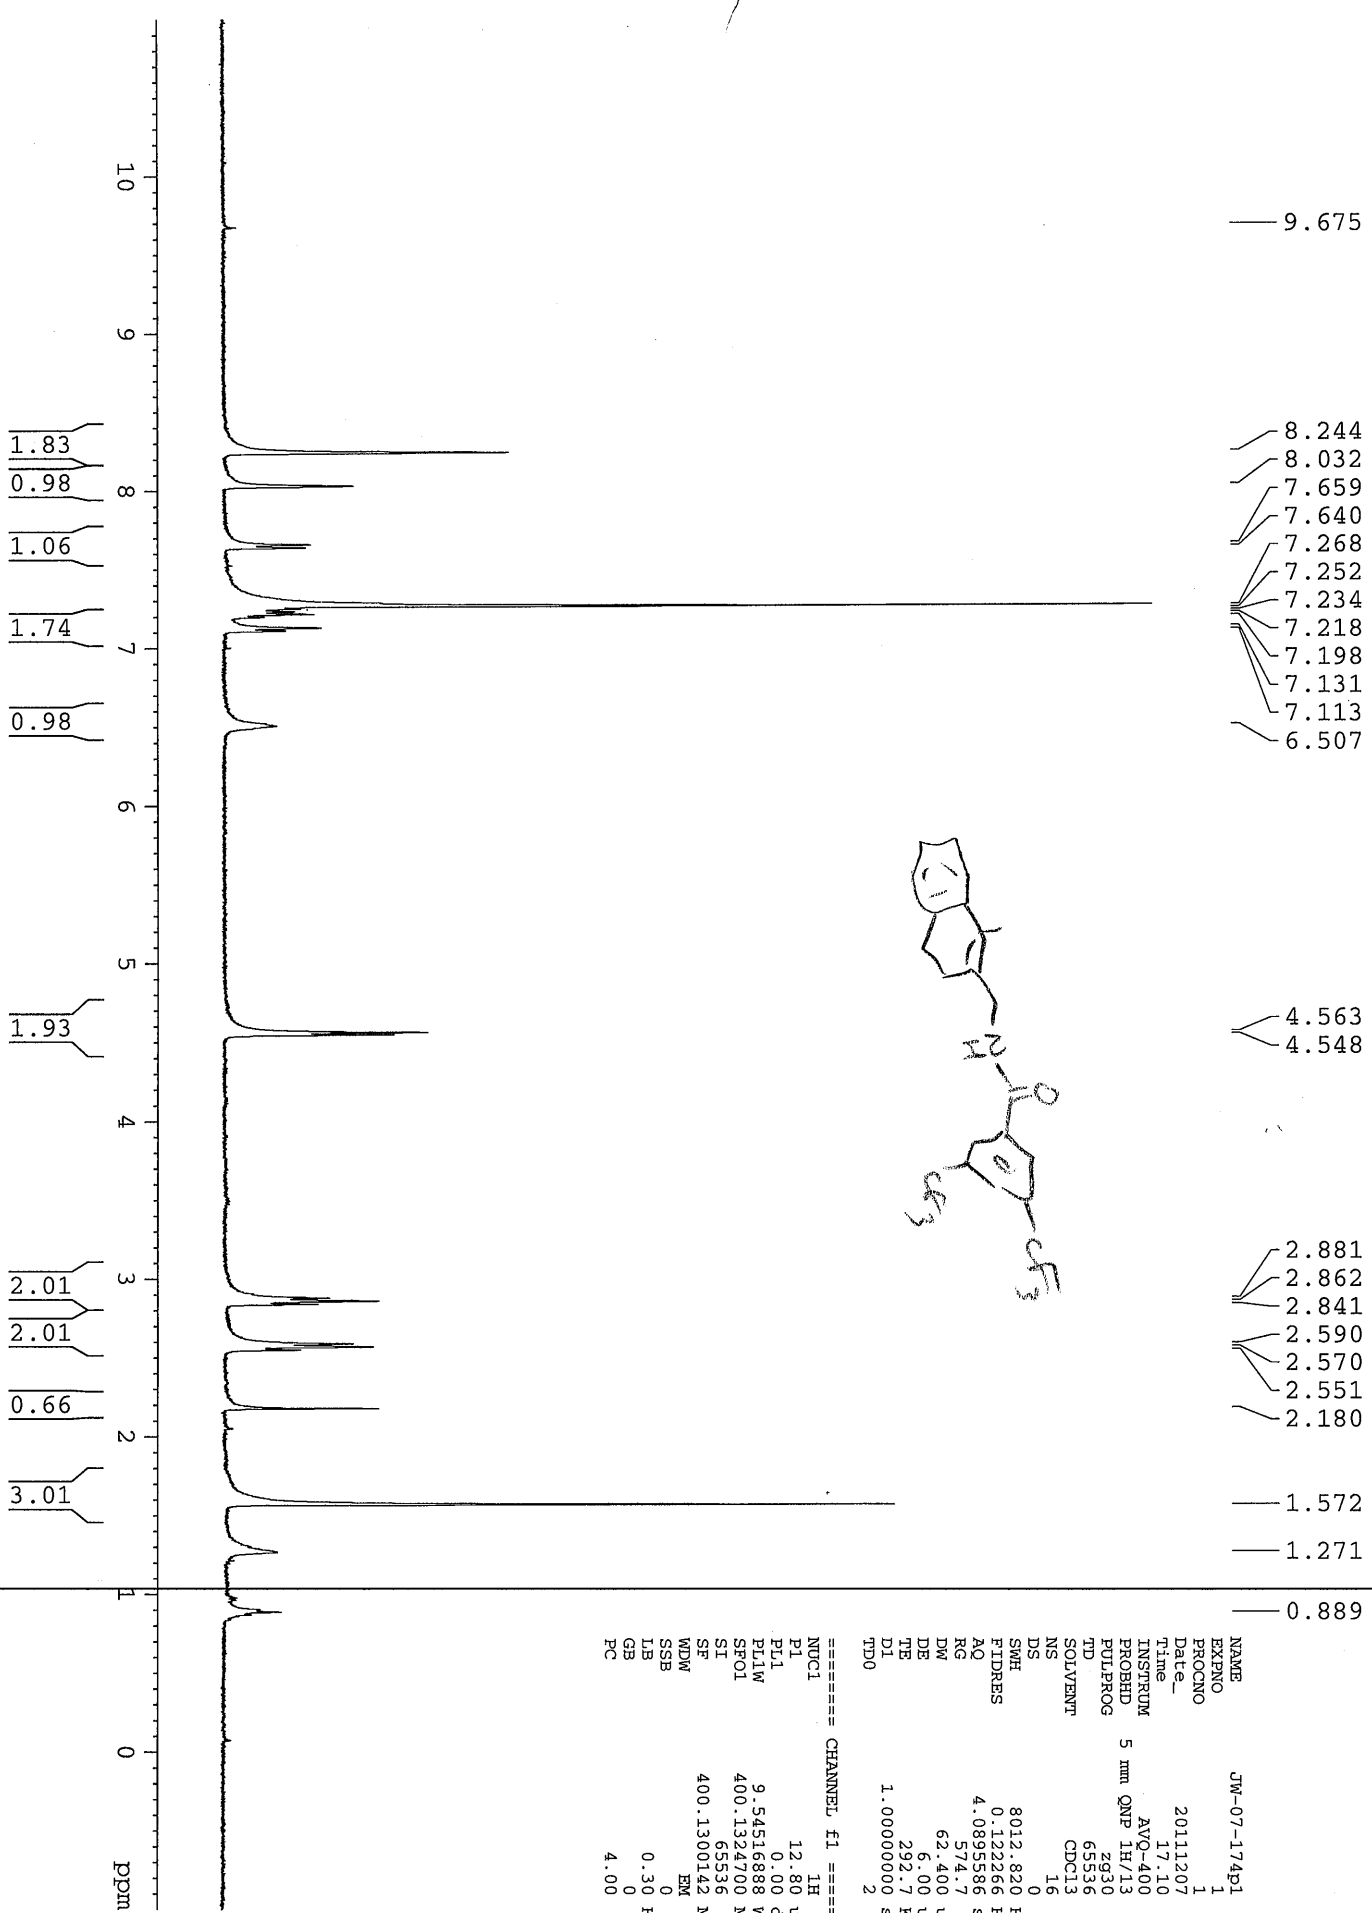

- 164.76
- 136.52
- 136.01
- 135.67
- 132.65
- 132.38
- 132.11
- 131.84
- 130.53
- 130.20
- 127.29
- 127.04
- 126.57
- 125.12
- 125.09
- 125.06
- 123.99
- 123.42
- 121.81

- 77.31
- 77.05
- 76.80

- 42.83

- 28.39
- 27.07

- 14.37

DRX-500 5mm TBIC probe 13C starting parameters. Rev 1/11/  
 With CPD proton decoupling. Use ns\*td0 scans

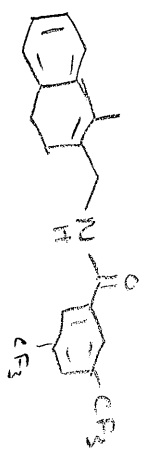

180 170 160 150 140 130 120 110 100 90 80 70 60 50 40 30 20 10 0 ppm

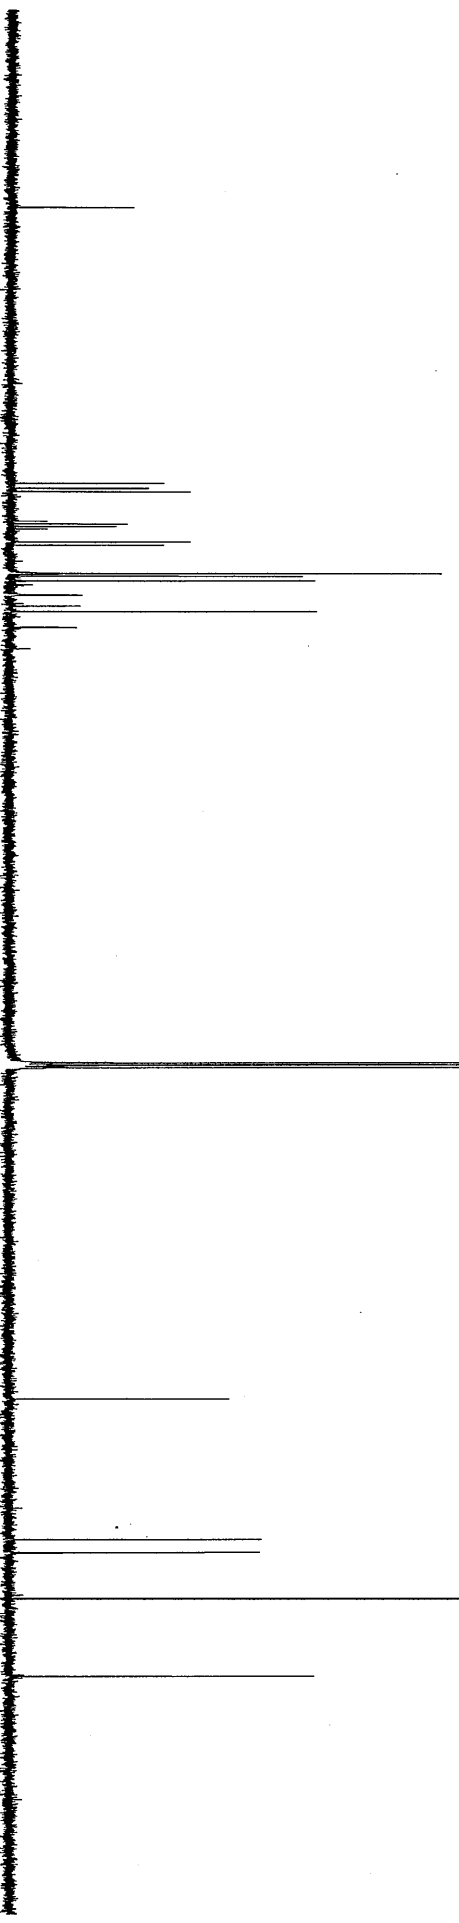

```

NAME          AD-JW-8-78
EXPNO         1
PROCNO        1
Date_         20120216
Time         14.36
INSTRUM       DRX-500
PROBHD        BBO BB-1H
PULPROG       zgpg30
TD            65536
SOLVENT       CDCl3
NS            1229
DS            0
SMH           41322.312 Hz
FIDRES        0.630528 Hz
AQ            0.7930356 sec
RG            2896.3
DW            12.100 usec
DE            6.00 usec
TE            292.4 K
D1            2.00000000 sec
d11           0.03000000 sec
DELTA         1.89999998 sec
TD0           10000

===== CHANNEL f1 =====
NUC1          13C
P1            10.75 usec
PL1           0.00 dB
SFO1         125.717545 MHz

===== CHANNEL f2 =====
CPDPRG2      waltz16
NUC2          1H
PCPD2        100.00 usec
PL2          -5.00 dB
PL12         7.04 dB
  
```

- 8.485
- 8.228
- 8.039
- 7.957
- 7.629
- 7.611
- 7.481
- 7.267
- 7.248
- 7.231
- 7.167
- 7.149
- 6.580
  
- 5.755
- 5.497
- 4.208
- 4.188
- 4.172
- 4.152
- 4.140
- 4.119
- 4.103
- 4.083
- 3.771
- 3.730
- 3.696
- 3.587
- 3.541
- 3.505
- 3.131
- 3.103
- 3.088
- 3.019
- 2.966
- 2.889
- 2.737
- 2.232
- 2.219
- 2.205
- 2.163
- 2.054
- 1.781
- 1.608
- 1.264
- 0.888

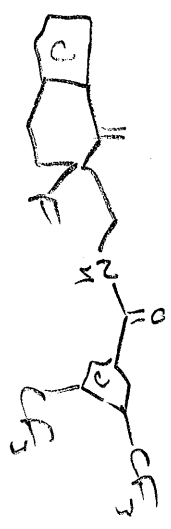

```

NAME          JW-08-80
EXPNO         1
PROCNO        1
Date_         20120209
Time         18:19
INSTRUM       AVQ-400
PROBHD        5 mm QNP 1H/13
PULPROG       zg30
TD            65536
SOLVENT       CDCl3
NS            8
DS            0
SWH           8012.820 Hz
FIDRES        0.122266 Hz
AQ            4.0894966 sec
RG            322.5
DM            62.400 use
DE            6.00 use
TE            292.9 K
D1            1.00000000 sec
TD0           1

===== CHANNEL f1 =====
NUC1          1H
P1            12.80 use
PL1           0.00 dB
PL1W          9.54516888 W
SFO1          400.1324700 MHz
SI            65536
SF            400.1300142 MHz
WDW           EM
SSB           0
LB            0.30 Hz
GB            0
PC            4.00
  
```

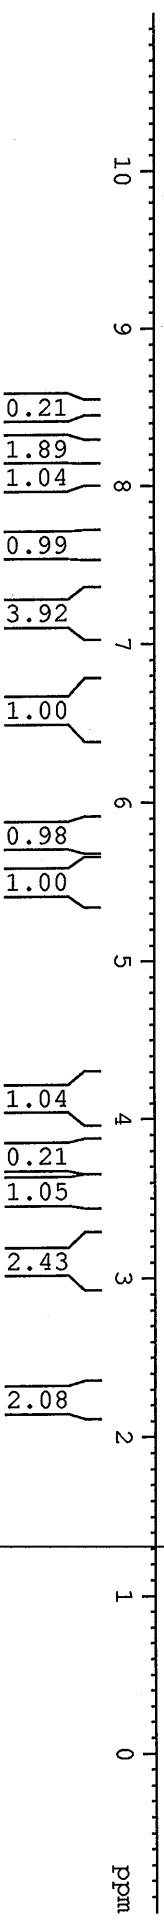



- 164.64
- 143.66
- 143.53
- 136.27
- 134.61
- 132.47
- 132.34
- 132.20
- 128.96
- 128.61
- 127.38
- 126.72
- 125.29
- 124.90
- 109.26
- 109.16
- 96.93
- 95.50
- 77.30
- 77.05
- 76.79
- 45.23
- 45.04
- 30.59
- 30.42
- 26.94
- 26.85

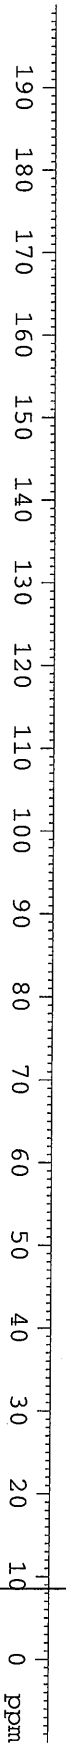

```

NAME AD-JW-80-CF3
EXPNO 1
PROCNO 1
Date_ 20120210
Time 14.05
INSTRUM DRX-500
PROBHD 5 mm BBO BB-1H
PULPROG zgpg30
TD 65536
SOLVENT CDCl3
NS 1099
DS 0
SWH 41322.312 Hz
FIDRES 0.630528 Hz
AQ 0.7930477 sec
RG 8192
DW 12.100 use
DE 6.00 use
TE 293.4 K
D1 2.0000000 sec
d11 0.0300000 sec
DELTA 1.8999998 sec
TD0 10000

===== CHANNEL f1 =====
NUC1 13C
P1 10.75 use
PL1 0.00 dB
SFO1 125.7175545 MHz

===== CHANNEL f2 =====
CPDPRG2 waltz16
NUC2 1H
PCPD2 100.00 use
PL2 -5.00 dB
PL12 7.04 dB
PL13 22.00 dB
SFO2 499.9221551 MHz
SI 131072
SF 125.7049840 MHz
WDW EM
SSB 0
LB 0.75 Hz
GB 0
PC 2.40
  
```

198-p1 AVQ-400 QNP Probe 19F starting parameters. (revise  
 chemical shifts relative to CFCl3 at 0 ppm (082103 HVH)  
 SW 239.28 ppm: o1p 0 ppm

62.066

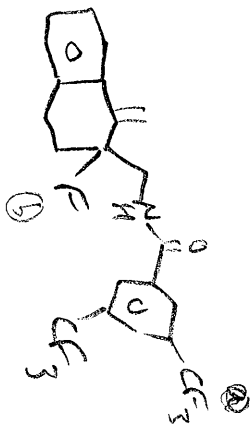

```

NAME          JW-07-198-p1F
EXPMO         1
PROCNO        20111208
Date_         11.35
Time_         AVQ-400
INSTRUM       5 mm QNP IH/13
PROBHD        zgpg1gm
PULPROG       1B1072
TD            CDCl3
SOLVENT       16
NS            0
DS            0
SWH           90090.094 HZ
FIDRES        0.687333 HZ
AQ            0.7274996 sec
RG            3251
RC            5.550 usec
DE            6.00 usec
TE            292.5 K
TD0           1.00000000 sec
D1            2
===== CHANNEL F1 =====
NUC1          19F
P1            16.00 usec
PL1           3.00 dB
PL1W          20.04748917 W
SFO1          376.4607042 MHz
SI            65536
SF            376.4980736 MHz
WDW           EM
SSB           0
LB            2.00 Hz
GB            0
PC            4.00
  
```

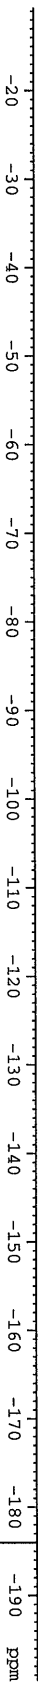

JW-08-80rac

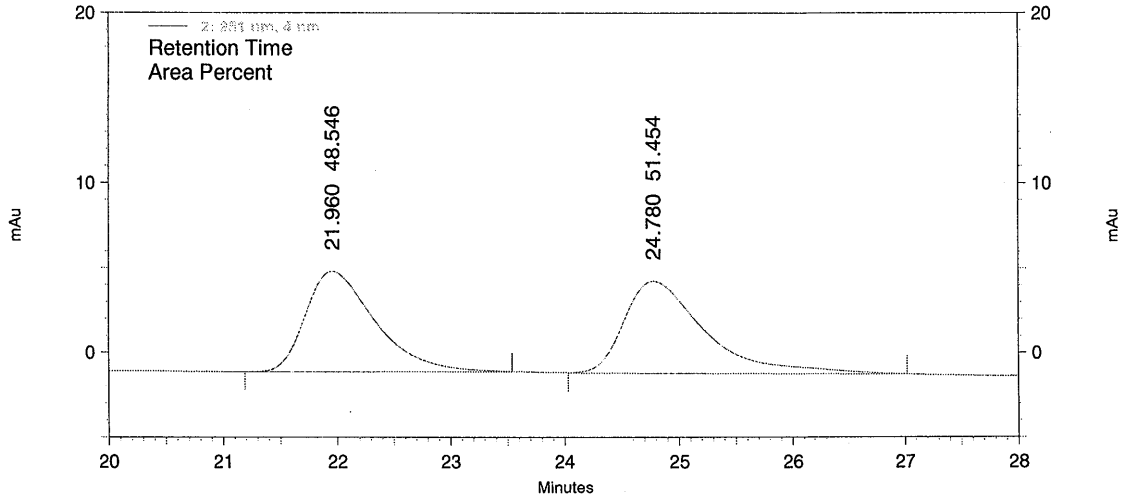

2: 251 nm, 4 nm  
Results

| Pk # | Retention Time | Area Percent | Lambda Max |
|------|----------------|--------------|------------|
| 1    | 21.960         | 48.546       | 213        |
| 2    | 24.780         | 51.454       | 213        |

JW-08-80rep-IB9901-30min

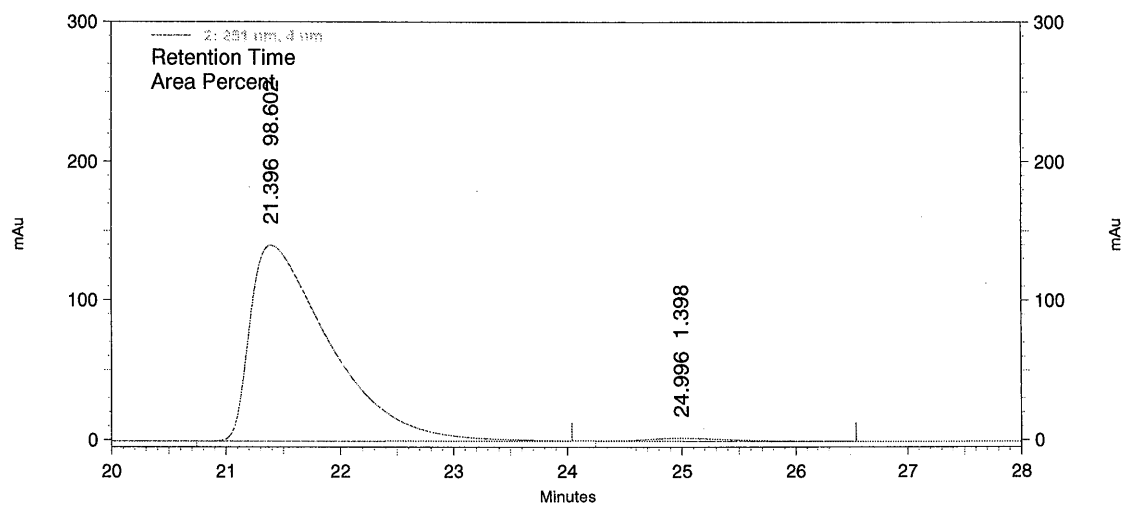

2: 251 nm, 4 nm

Results

| Pk # | Retention Time | Area Percent | Lambda Max |
|------|----------------|--------------|------------|
| 1    | 21.396         | 98.602       | 209        |
| 2    | 24.996         | 1.398        | 214        |

```

NAME          JW-AD67
EXPNO         1
PROCNO        1
Date_         20120204
Time         9.41
INSTRUM       AVO-400
PROBHD        5 mm QNP 1H/13
PULPROG       zg30
TD            65536
SOLVENT       CDCl3
NS            8
DS            0
SWH           8012.820 Hz
AQ           0.122266 Hz
RG           4.0895586 sec
WDW           57
DE           62.400 usec
TE           293.0 K
D1           1.00000000 sec
TD0          1

===== CHANNEL f1 =====
NUC1          1H
P1           12.80 usec
PL1          0.00 dB
PL1W         9.54516888 W
SFO1         400.1324700 MHz
SI           65536
SF           400.1300142 MHz
WDW          EM
SSB          0
LB           0.30 Hz
GB           0
PC           4.00

```

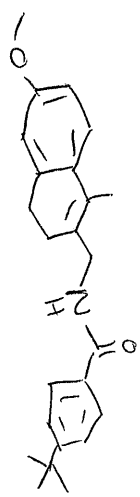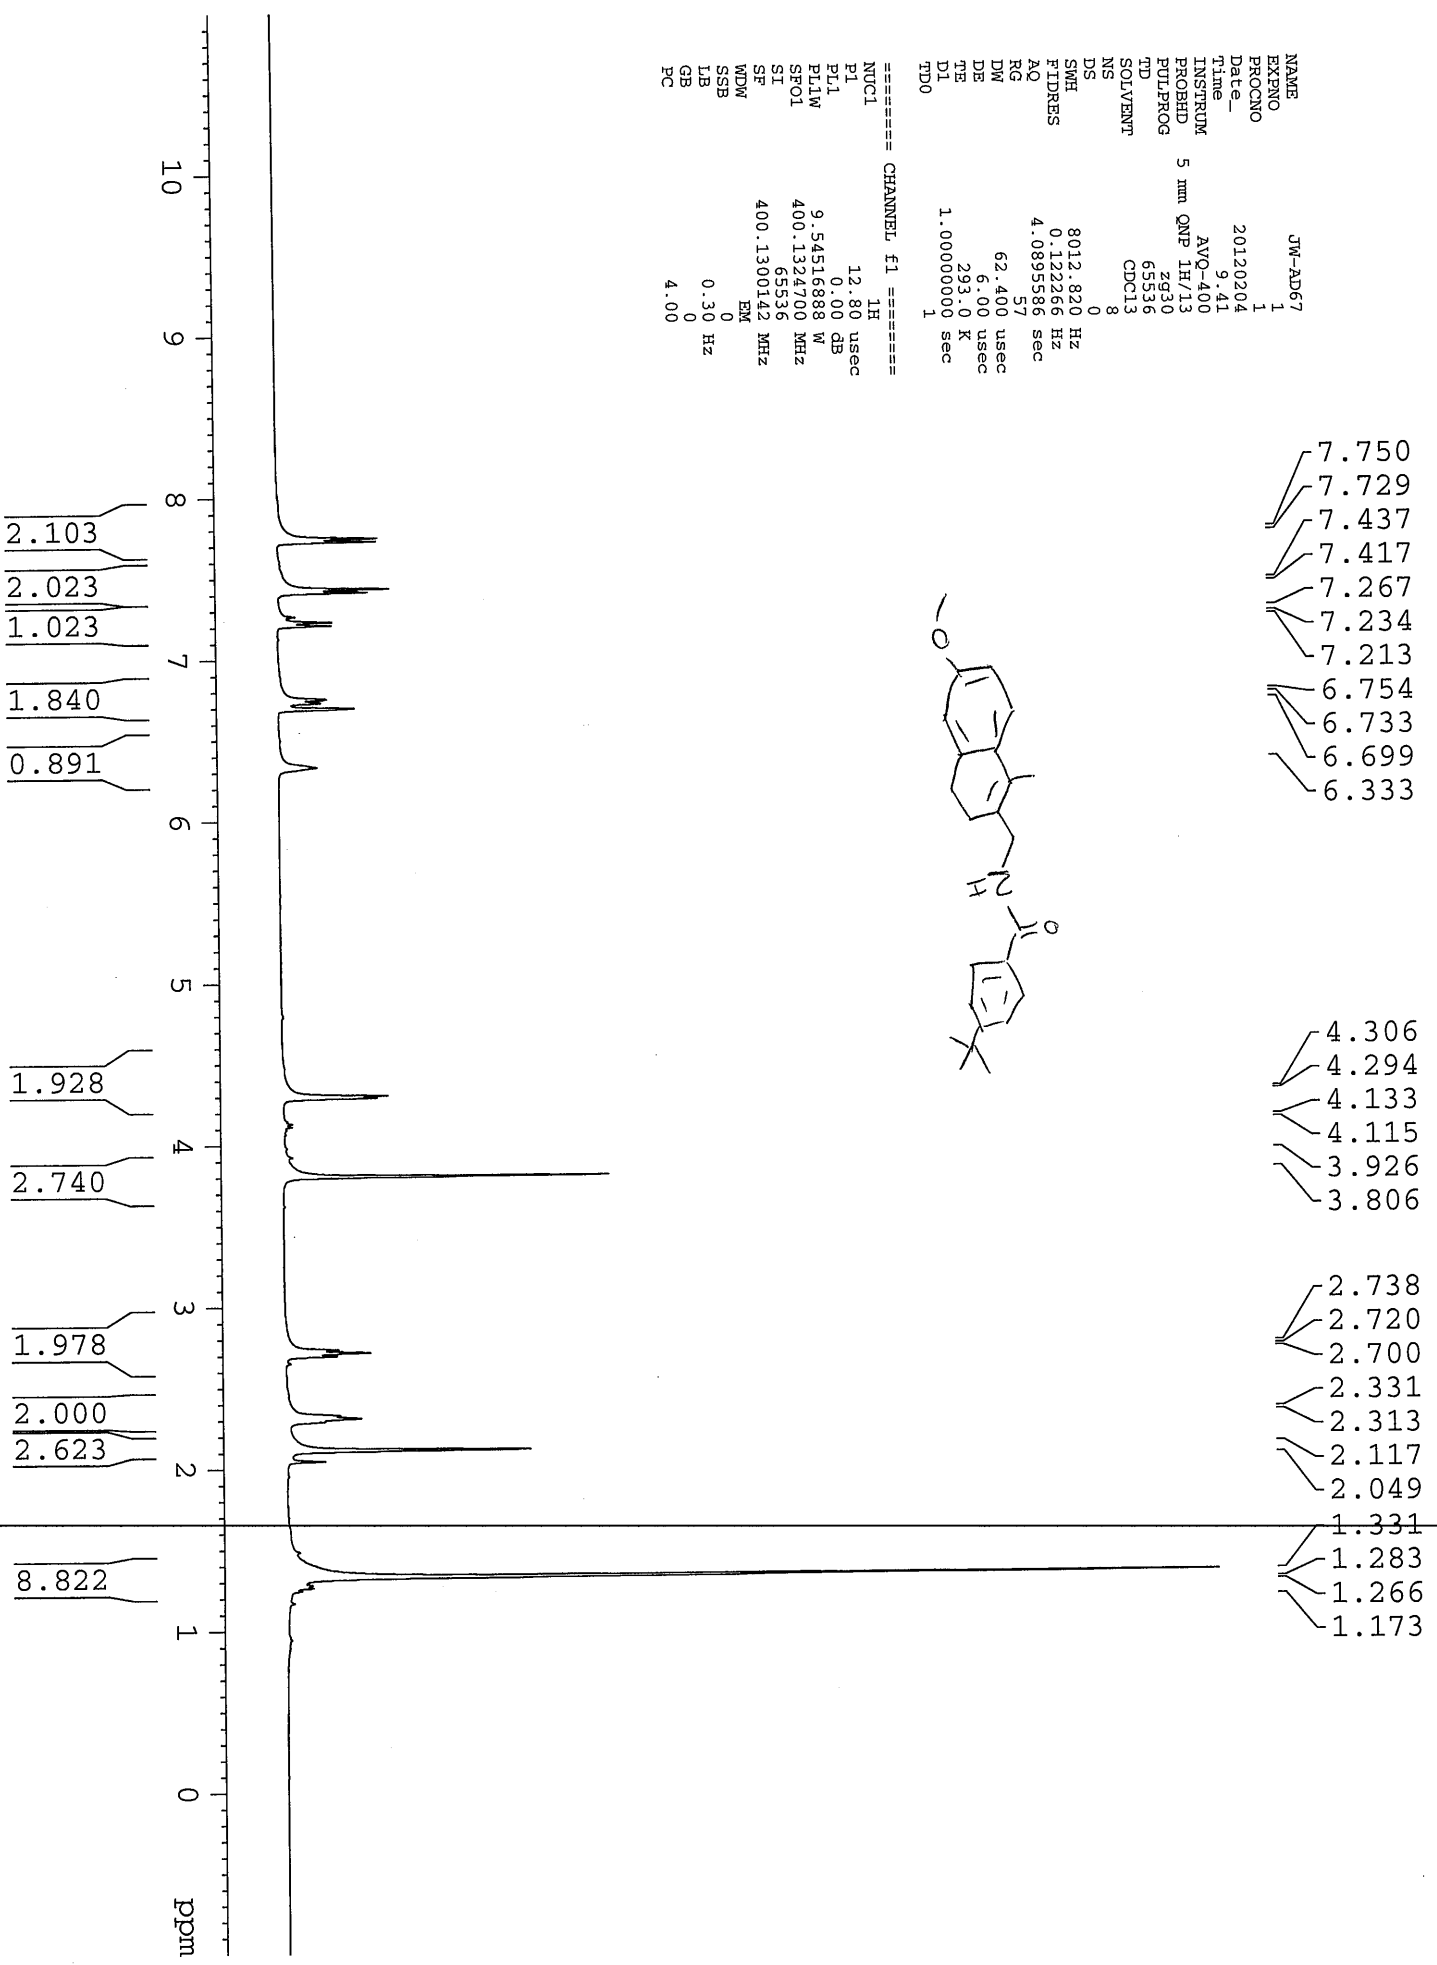

JW-AD 67 AVQ-400 QNP Carbon Starting parameters 7/16

```

NAME          JW-AD67C
EXPNO         1
PROCNO        1
Date_         20120204
Time          9.42
INSTRUM       AVQ-400
PROBHD        5 mm QNP 1H/13
PULPROG       zgpg30
TD            65536
SOLVENT       CDCl3
NS            73
DS            0
SMH           24038.461 Hz
FIDRES        0.366798 Hz
AQ            1.3632196 sec
RG            16384
DW            20.800 usec
DE            6.00 usec
TE            293.1 K
D1            2.00000000 sec
D11           0.03000000 sec
TD0           100000
    
```

```

===== CHANNEL F1 =====
NUC1          13C
P1            8.50 usec
PL1          -2.00 dB
PL1W         47.77286148 W
SFO1         100.6228298 MHz
    
```

```

===== CHANNEL F2 =====
CPDPRG2       waltz16
NUC2          1H
PCPD2         70.00 usec
PL2           0.00 dB
PL12         15.00 dB
PL13         17.00 dB
PL2W         9.54516888 W
PL12W        0.30184472 W
PL13W        0.19045115 W
SFO2         400.1316000 MHz
SI            32768
SF            100.6127755 MHz
WDW           EM
SSB           0
LB            1.50 Hz
GB            0
PC            1.40
    
```

- 167.56
- 158.34
- 154.84
- 137.60
- 131.66
- 129.44
- 129.25
- 128.80
- 126.79
- 125.44
- 124.46
- 113.26
- 110.95
- 77.39
- 77.07
- 76.75
- 55.20
- 42.15
- 34.87
- 31.14
- 28.92
- 26.79
- 14.22

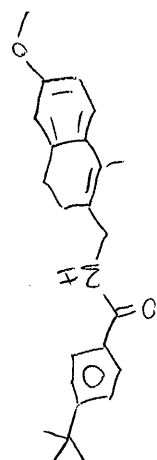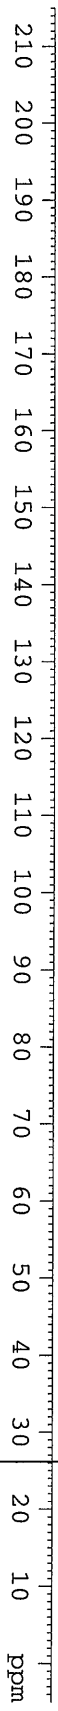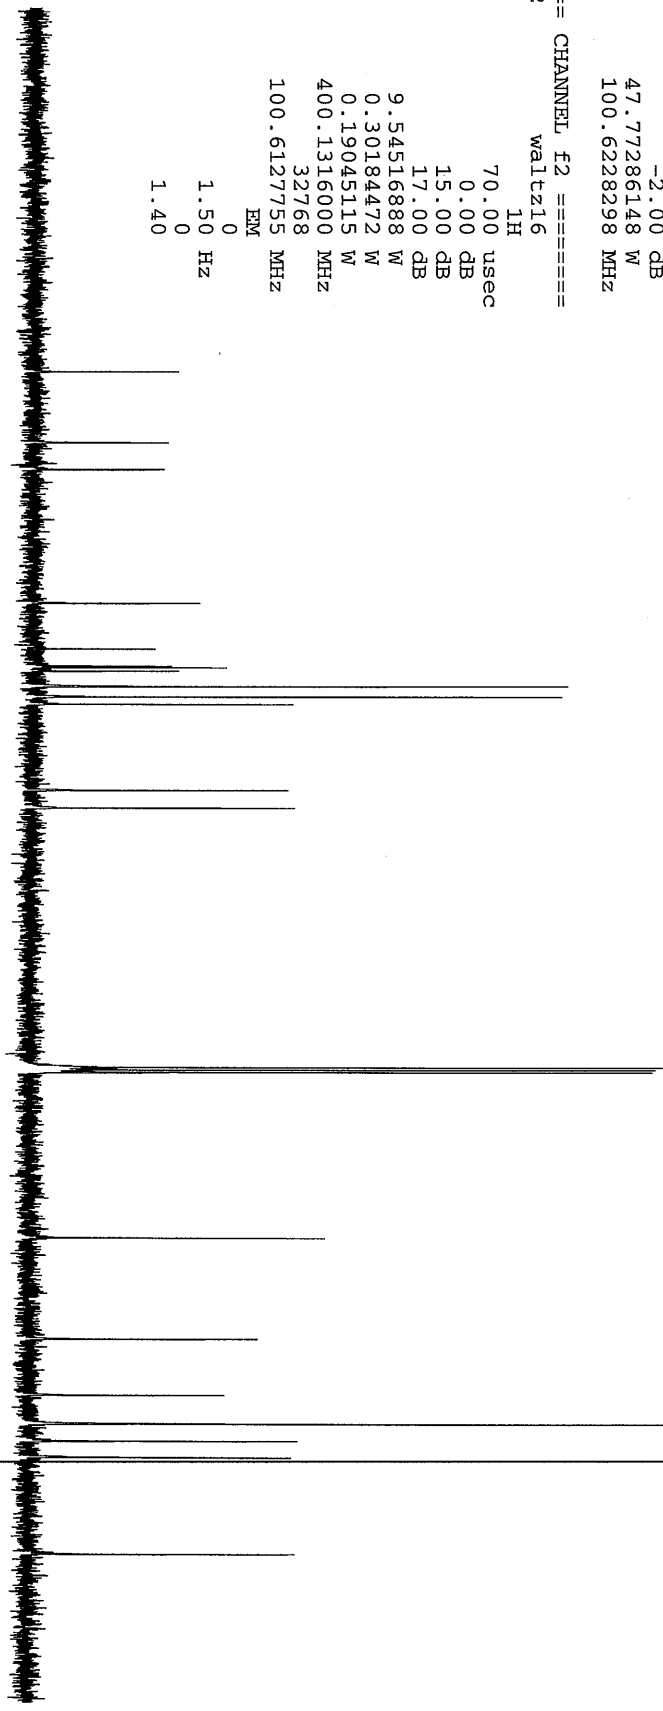

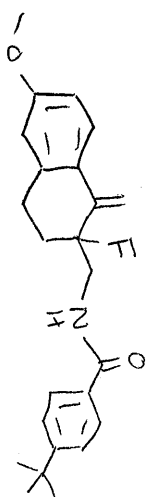

| NAME       | EXPNO | PROCNO | Date_    | Time  | INSTRUM | PROBHD        | PULPROG | TD   | SOLVENT | NS    | DS | SWH | FIDRES      | AQ          | RG            | DM  | DE         | TE       | D1      | TD0            |   |
|------------|-------|--------|----------|-------|---------|---------------|---------|------|---------|-------|----|-----|-------------|-------------|---------------|-----|------------|----------|---------|----------------|---|
| JW-08-76-1 | 1     | 1      | 20120208 | 10.27 | AYB-400 | 5 mm PABO BB- | ZG30    | 2930 | 65536   | CPCL3 | 32 | 0   | 8278.146 Hz | 0.126314 Hz | 3.9584243 sec | 181 | 60.400 use | 6.00 use | 297.5 K | 1.00000000 sec | 4 |

CHANNEL F1

|      |                 |
|------|-----------------|
| NUC1 | 1H              |
| F1   | 8.20 use        |
| PL1  | -3.00 dB        |
| PL1W | 23.05461311 W   |
| SFO1 | 400.1324710 MHz |
| SI   | 32768           |
| SF   | 400.1300000 MHz |
| WDW  | EM              |
| SSB  | 0               |
| LB   | 0.30 Hz         |
| GB   | 0               |
| PC   | 4.00            |

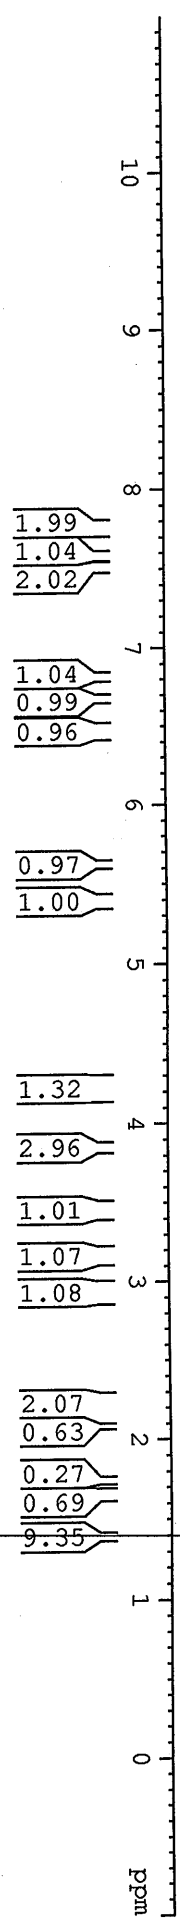

| Chemical Shift (ppm) |
|----------------------|
| 7.986                |
| 7.965                |
| 7.784                |
| 7.763                |
| 7.587                |
| 7.565                |
| 7.522                |
| 7.502                |
| 7.463                |
| 7.442                |
| 7.303                |
| 6.832                |
| 6.826                |
| 6.810                |
| 6.804                |
| 6.672                |
| 6.481                |
| 6.469                |
| 5.629                |
| 5.622                |
| 5.403                |
| 4.272                |
| 4.251                |
| 4.235                |
| 4.214                |
| 4.198                |
| 4.175                |
| 4.157                |
| 4.140                |
| 3.841                |
| 3.800                |
| 3.501                |
| 3.492                |
| 3.456                |
| 3.448                |
| 3.420                |
| 3.411                |
| 3.212                |
| 3.197                |
| 3.182                |
| 3.168                |
| 3.153                |
| 3.139                |
| 3.124                |
| 2.962                |
| 2.919                |
| 2.272                |
| 2.263                |
| 2.256                |
| 2.249                |
| 2.240                |
| 2.231                |
| 2.217                |
| 2.196                |
| 2.181                |
| 2.168                |
| 2.153                |
| 2.142                |
| 2.126                |
| 2.088                |
| 1.748                |
| 1.658                |
| 1.386                |
| 1.374                |
| 1.320                |
| 1.303                |
| 1.285                |

- 167.36
- 159.71
- 155.26
- 143.50
- 136.37
- 131.35
- 126.84
- 126.25
- 125.63
- 125.35
- 113.60
- 112.67
- 106.72
- 106.62
- 77.31
- 77.06
- 76.80
- 55.31
- 44.81
- 44.62
- 34.99
- 31.19
- 30.32
- 30.15
- 27.31
- 27.22

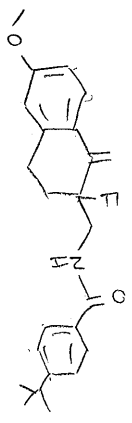

NAME AD-JW-76-one  
 EXPNO 1  
 PROCNO 1  
 Date\_ 20120209  
 Time 16.04  
 INSTRUM DRX-500  
 PROBD 5 mm BBO BB-1H  
 PULPROG zgpg30  
 TD 65836  
 ID 65836  
 SOLVENT CDCl3  
 NS 750  
 DS 0  
 SMH 41322.312 Hz  
 FIDRES 0.630528 Hz  
 AQ 0.7930356 sec  
 RG 8192  
 DW 12.100 usec  
 DE 6.00 usec  
 TE 292.9 K  
 D1 2.00000000 sec  
 d11 0.03000000 sec  
 DELTA 1.89999998 sec  
 ID0 10000

==== CHANNEL F1 =====  
 NUC1 13C  
 P1 10.75 usec  
 PL1 0.00 dB  
 SFO1 125.7175545 MHz

==== CHANNEL F2 =====  
 CPDPRG2 waltz16  
 NUC2 1H  
 PCPD2 100.00 usec  
 PL2 -5.00 dB  
 PL12 7.04 dB

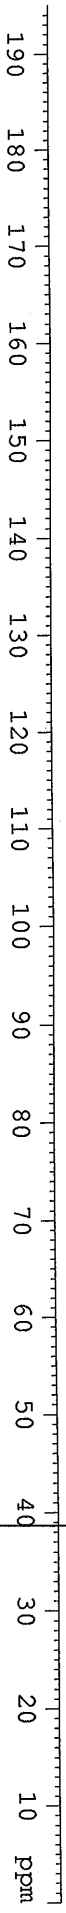



AVO-400 QNP Probe 19F starting parameters. (revised P1, 2  
 chemical shifts relative to CFCl3 at 0 ppm (082103 HVH)  
 sw 239.28 ppm; o1p 0 ppm

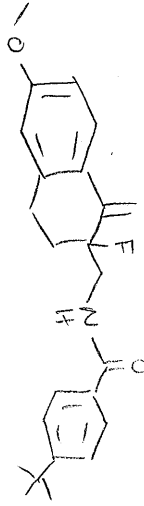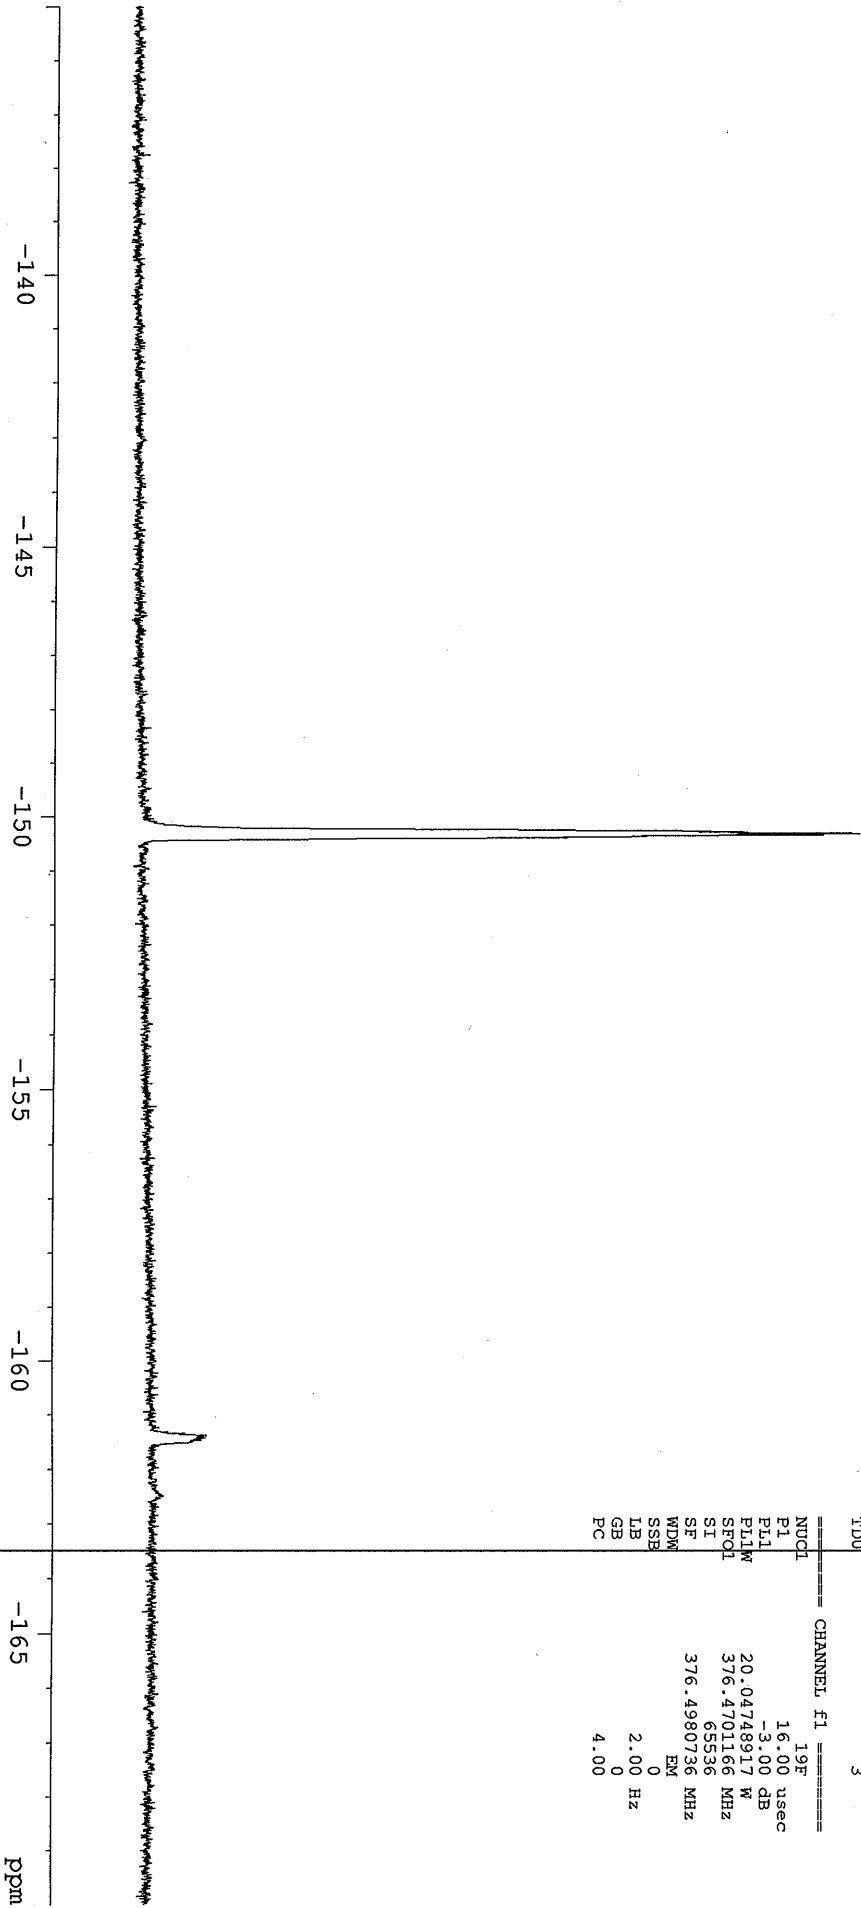

|         |                |
|---------|----------------|
| NAME    | AD-JW-76-ome-F |
| EXPNO   | 1              |
| PROCNO  | 1              |
| Date_   | 20120209       |
| Time    | 16.48          |
| INSTRUM | AVO-400        |
| PROBHD  | 5 mm QNP 1H/13 |
| PULPROG | zgpg1gm        |
| TD      | 131072         |
| SOLVENT | CDCl3          |
| NS      | 24             |
| DS      | 0              |
| SMH     | 90090.094 Hz   |
| FIDRES  | 0.687333 Hz    |
| AO      | 0.7274996 sec  |
| RG      | 4597.6         |
| DW      | 5.550 usec     |
| DE      | 6.00 usec      |
| TE      | 292.8 K        |
| D1      | 1.00000000 sec |
| TD0     | 3              |

  

|                        |                 |
|------------------------|-----------------|
| ===== CHANNEL F1 ===== |                 |
| NUCL                   | 19F             |
| P1                     | 16.00 usec      |
| P1L                    | -3.00 dB        |
| P1LW                   | 20.04748917 W   |
| SFO1                   | 376.4701166 MHz |
| SI                     | 65536           |
| SF                     | 376.4980736 MHz |
| WDW                    | EM              |
| SSB                    | 0               |
| LB                     | 2.00 Hz         |
| GB                     | 0               |
| PC                     | 4.00            |

AD-2-68rac-ic9604-70min

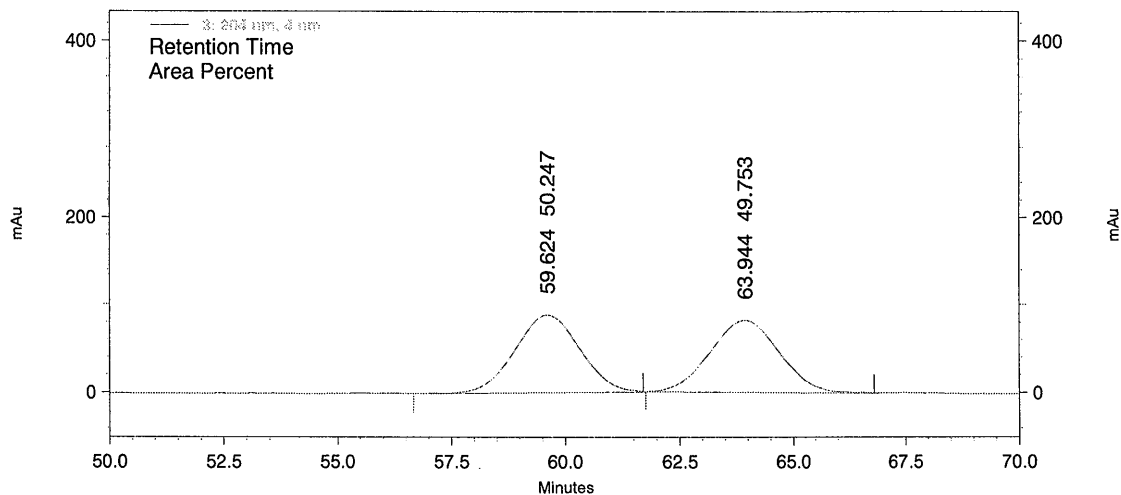

3: 204 nm, 4 nm

Results

| Pk # | Retention Time | Area Percent | Lambda Max |
|------|----------------|--------------|------------|
| 1    | 59.624         | 50.247       | 204        |
| 2    | 63.944         | 49.753       | 204        |

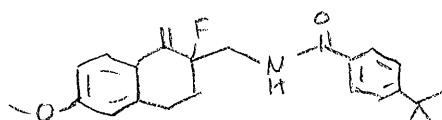

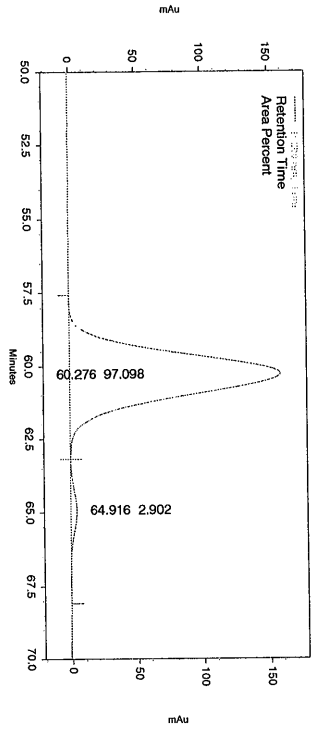

1: 208 nm, 4 nm

| PK # | Retention Time | Area Percent | Lambda Max |
|------|----------------|--------------|------------|
| 1    | 60.276         | 97.098       | 203        |
| 2    | 64.916         | 2.902        | 204        |

1C9604-70

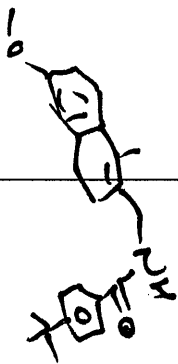

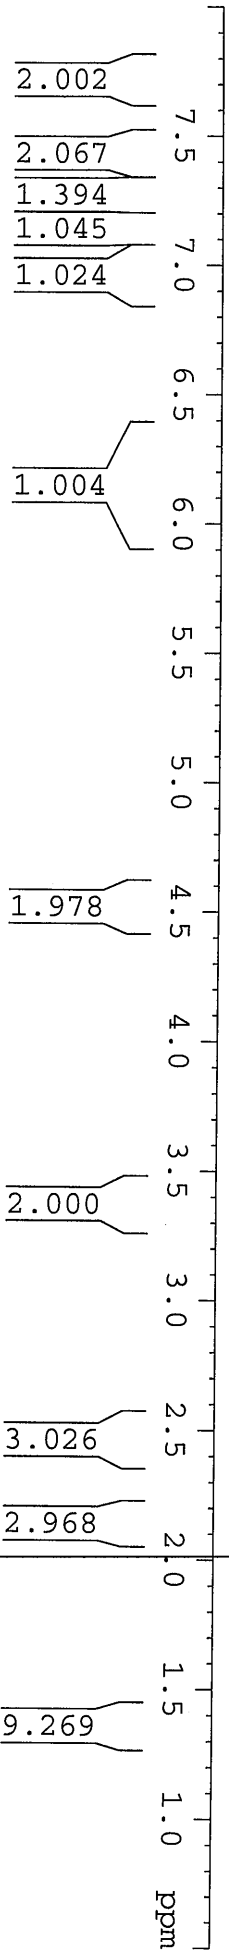

- 7.728
- 7.707
- 7.449
- 7.428
- 7.292
- 7.269
- 7.129
- 7.024
- 7.006

6.261

- 4.512
- 4.498

3.675

3.382

- 2.419
- 2.360

- 2.151
- 2.056

1.716

- 1.489
- 1.334

1.174

```

NAME AD-65-hexwash
EXPNO 3
PROCNO 1
Date_ 20120129
Time 13.16
INSTRUM AVO-400
PROBHD 5 mm QNP 1H/13
PULPROG zg30
TD 65536
SOLVENT CDCl3
NS 8
DS 0
SWH 8012.820 Hz
FIDRES 0.122266 Hz
AQ 4.0895586 sec
RG 181
DW 62.400 usec
DE 6.00 usec
TE 292.5 K
D1 1.00000000 sec
TD0 1

===== CHANNEL f1 =====
NUC1 1H
P1 12.80 usec
PL1 0.00 dB
PL1W 9.54516888 W
SFO1 400.1324700 MHz
SI 65536
SF 400.1300142 MHz
WDW EM
SSB 0
LB 0.30 Hz
GB 0
PC 4.00

```

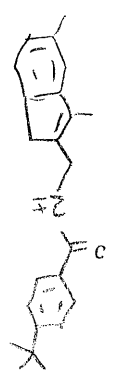

NAME AD-65-hexwash-C

EXPNO 3  
 PROCNO 1  
 Date\_ 20120129  
 Time 13.20  
 INSTRUM AVQ-400  
 PROBD 5 mm QNP 1H/13  
 PULPROG zgpg30  
 TD 65536  
 SOLVENT CDC13  
 NS 329  
 DS 0  
 SWH 24038.461 Hz  
 FIDRES 0.366798 Hz  
 AQ 1.3632196 sec  
 RG 16384  
 DW 20.800 usec  
 DE 6.00 usec  
 TE 292.8 K  
 D1 2.00000000 sec  
 D11 0.03000000 sec  
 TDO 1000

==== CHANNEL f1 =====  
 NUC1 13C  
 P1 8.50 usec  
 PL1 -2.00 dB  
 PL1W 47.77286148 W  
 SFO1 100.6228298 MHz

==== CHANNEL f2 =====  
 CPDPRG2 waltz16  
 NUC2 1H  
 PCPD2 70.00 usec  
 PL2 0.00 dB  
 PL12 15.00 dB  
 PL13 17.00 dB  
 PL2W 9.54516888 W  
 PL12W 0.30184472 W  
 PL13W 0.19045115 W  
 SFO2 400.1316000 MHz  
 SI 32768  
 SF 100.6127755 MHz  
 WDW EM  
 SSB 0  
 LB 1.50 Hz  
 GB 0  
 PC 1.40

- 167.26
- 154.96
- 146.56
- 139.50
- 137.48
- 136.17
- 135.87
- 131.52
- 126.70
- 125.59
- 125.50
- 123.11
- 119.68

- 77.33
- 77.21
- 77.01
- 76.69

- 39.18
- 37.55
- 34.89
- 31.13

- 21.53
- 10.40

210 200 190 180 170 160 150 140 130 120 110 100 90 80 70 60 50 40 30 20 10 0 ppm

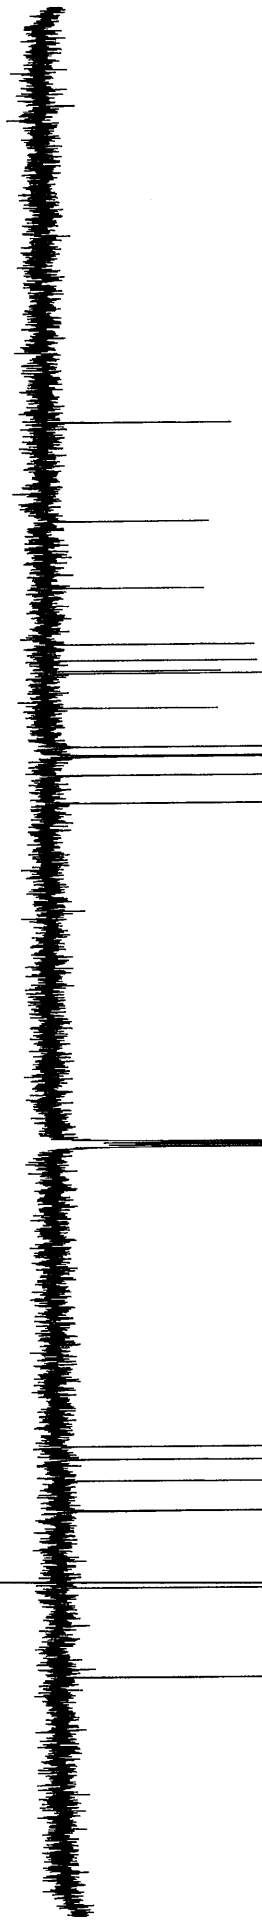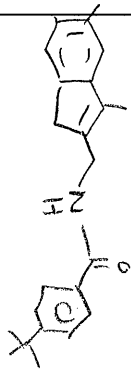

```

NAME          JW-08-60
EXPNO         1
PROCNO        1
Date_         20120131
Time_         17.30
INSTRUM       AVQ-400
PROBHD        5 mm QNP 1H/13
PULPROG       zg30
TD            65536
SOLVENT       CDCl3
NS            8
DS            0
SWH           8012.820 Hz
FIDRES        0.122266 Hz
AQ            4.0894966 sec
RG            181
DW            62.400 usec
DE            6.00 usec
TE            293.1 K
D1            1.00000000 sec
TD0           1

```

```

===== CHANNEL f1 =====
NUC1          1H
P1            12.80 usec
PL1           0.00 dB
PL1W          9.54516888 W
SFO1          400.1324700 MHz
SI            65536
SF            400.1300142 MHz
WDW           EM
SSB           0
LB            0.30 Hz
GB            0
PC            4.00

```

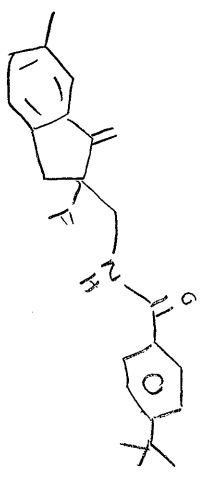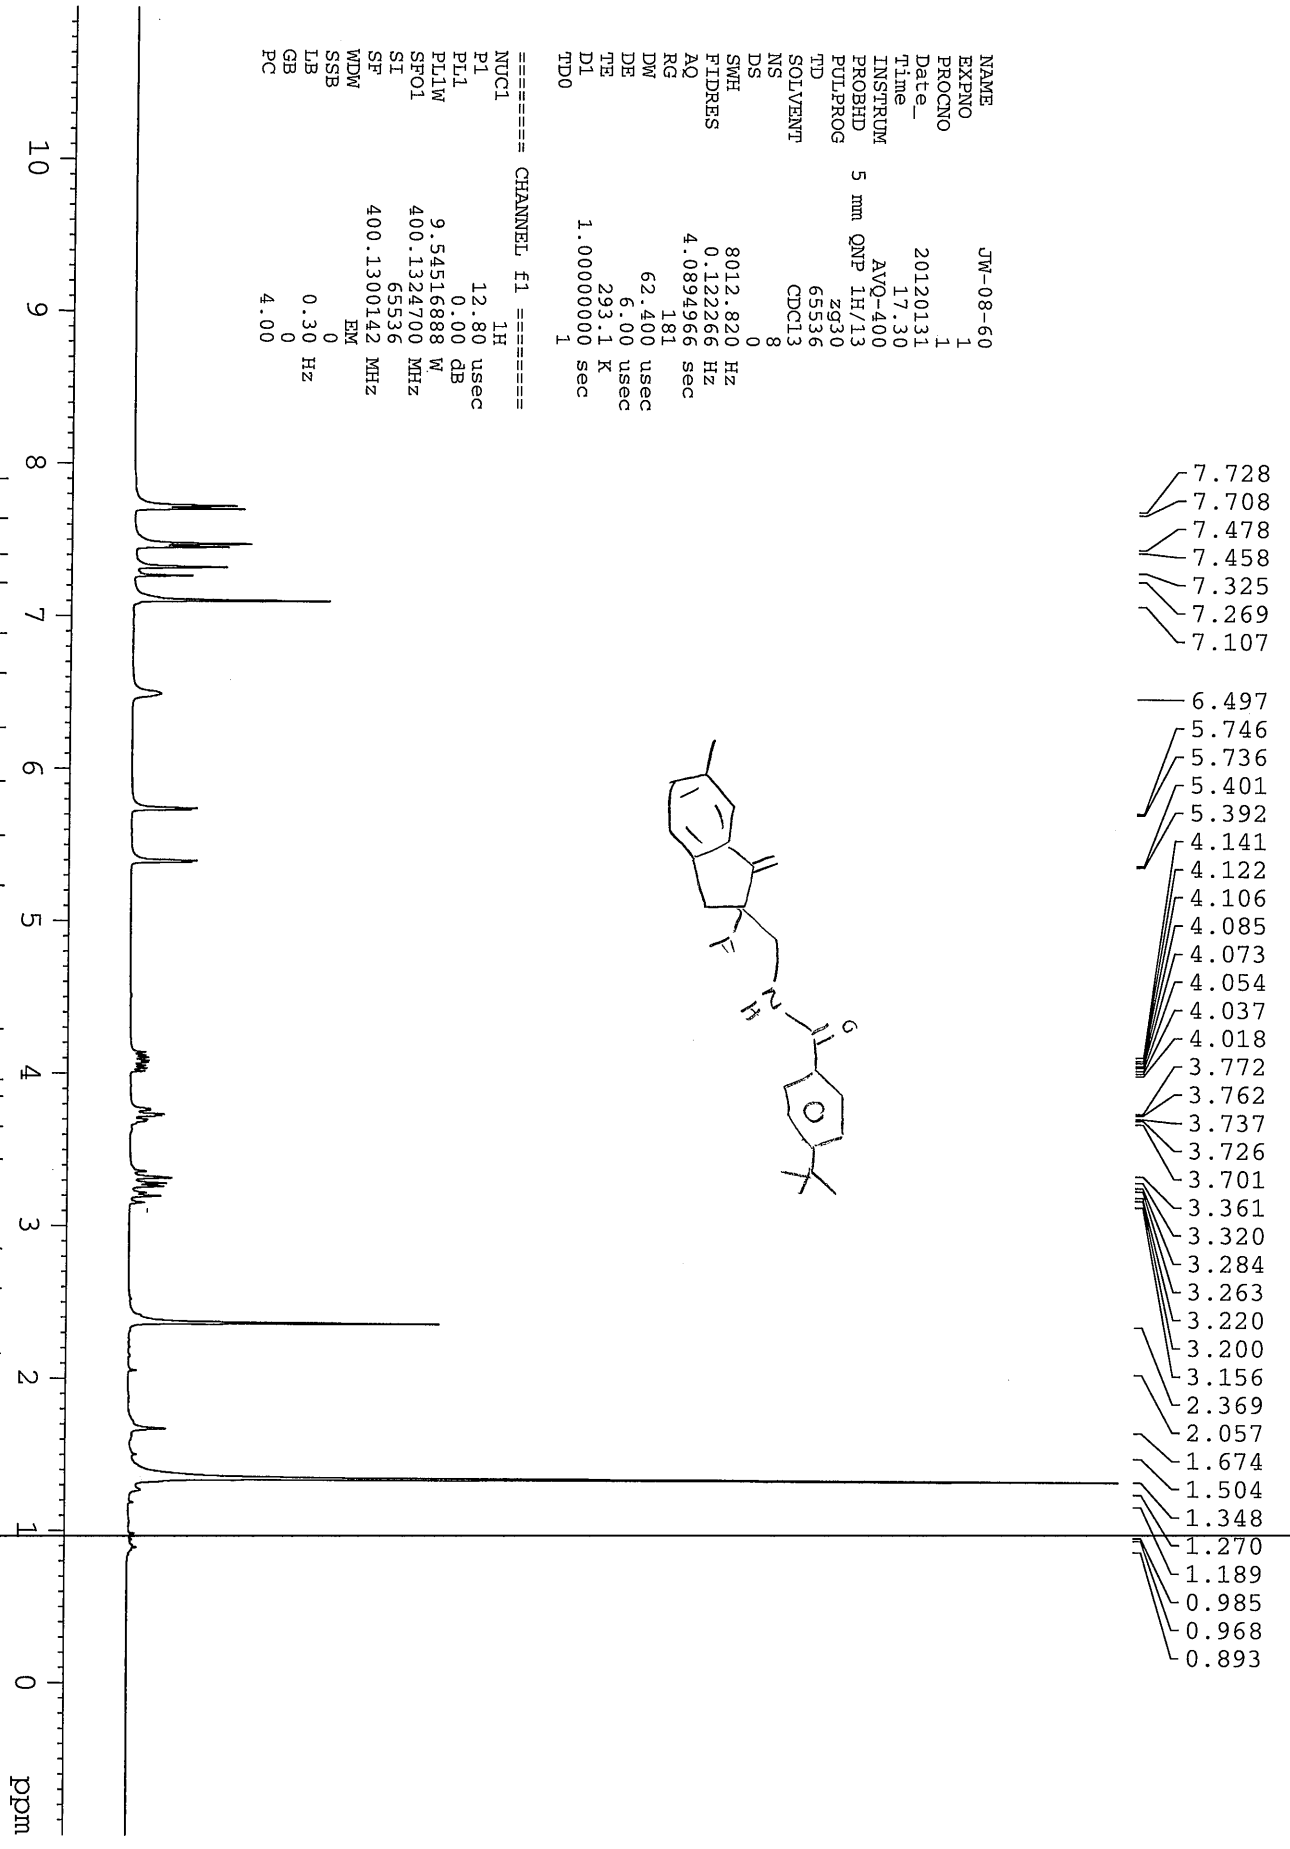

- 7.728
- 7.708
- 7.478
- 7.458
- 7.325
- 7.269
- 7.107
- 6.497
- 5.746
- 5.736
- 5.401
- 5.392
- 4.141
- 4.122
- 4.106
- 4.085
- 4.073
- 4.054
- 4.037
- 4.018
- 3.772
- 3.762
- 3.737
- 3.726
- 3.701
- 3.361
- 3.320
- 3.284
- 3.263
- 3.220
- 3.200
- 3.156
- 2.369
- 2.057
- 1.674
- 1.504
- 1.348
- 1.270
- 1.189
- 0.985
- 0.968
- 0.893

AVQ-400 QNP Carbon Starting parameters 7/16/03 revised 7/22/03 RN

```

NAME          JW-08-60carb
EXPNO         1
PROCNO        1
Date_         20120131
Time_         17.31
INSTRUM       AVQ-400
PROBHD        5 mm QNP 1H/13
PULPROG       zgpg30
TD            65536
SOLVENT       CDCl3
NS            297
DS            0
SMH           24038.461 Hz
FIDRES        0.366798 Hz
AQ            1.3631988 sec
RG            16384
DM            20.800 usec
DE            6.00 usec
TE            293.2 K
D1            2.00000000 sec
D11           0.03000000 sec
TD0           100000
    
```

```

===== CHANNEL f1 =====
NUC1          13C
P1            8.50 usec
PL1           -2.00 dB
PL1W          47.77286148 W
SFO1          100.62282298 MHz
    
```

```

===== CHANNEL f2 =====
CPDPRG2       waltz16
NUC2          1H
PCPD2         70.00 usec
PL2           0.00 dB
PL12          15.00 dB
PL13          17.00 dB
PL2W          9.54516888 W
PL12W         0.30184472 W
PL13W         0.19045115 W
SFO2          400.1316000 MHz
SI            32768
SF            100.6127755 MHz
WDW           EM
SSB           0
LB            1.50 Hz
GB            0
PC            1.40
    
```

- 167.532
- 155.226
- 149.188
- 149.018
- 137.834
- 137.695
- 137.063
- 131.257
- 130.714
- 126.792
- 125.562
- 125.125
- 121.454
- 107.194
- 107.139
- 102.905
- 77.318
- 77.000
- 76.683
- 46.031
- 45.755
- 40.424
- 40.188
- 34.920
- 31.126
- 21.336

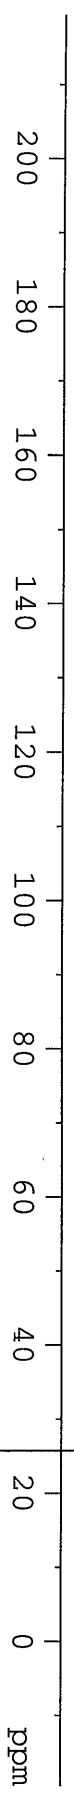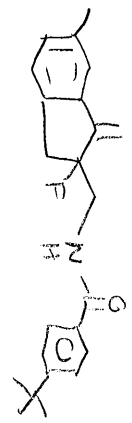

-144.83  
 -144.87  
 -144.90  
 -144.94  
 -144.97  
 -145.01

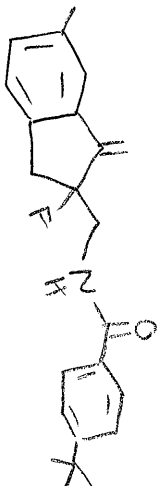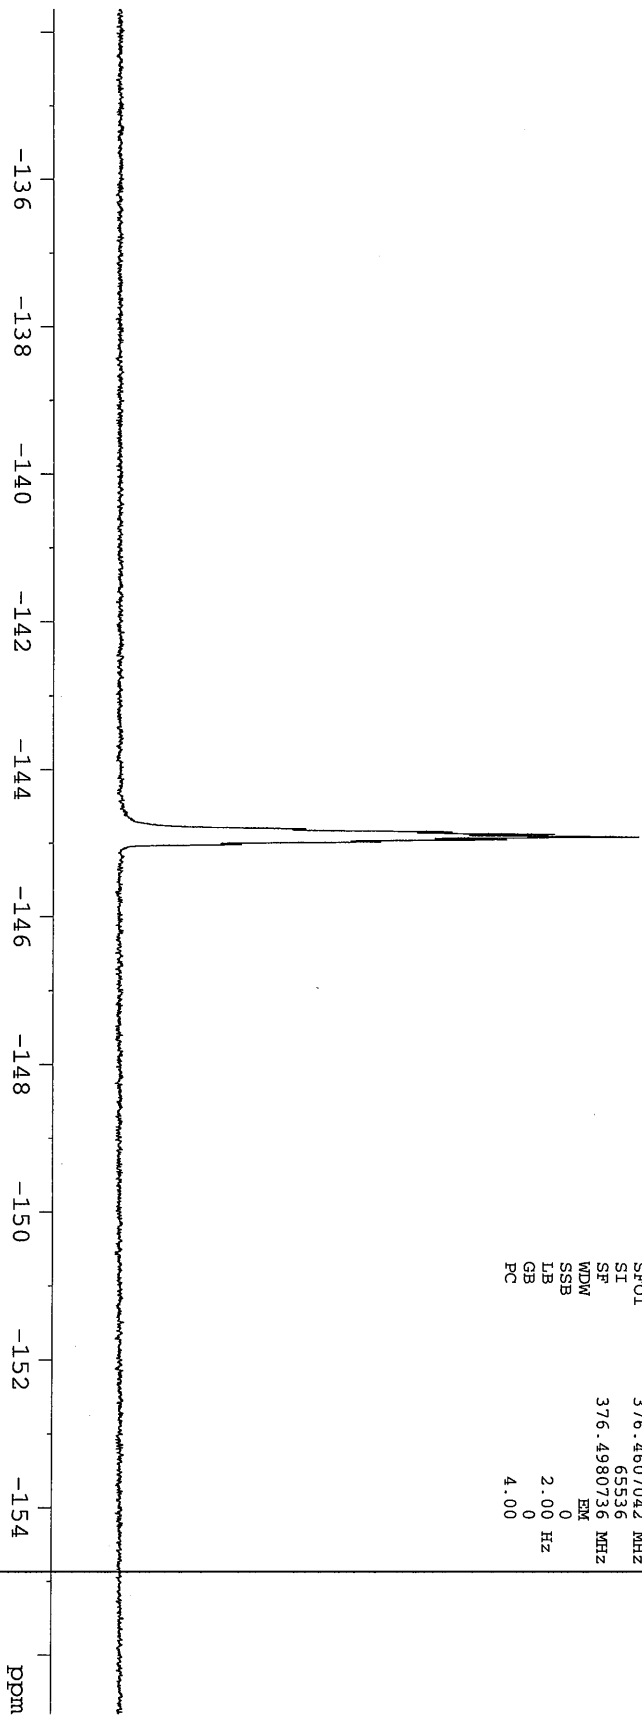

```

NAME          JW-08-60F
EXPNO         1
PROCNO        1
Date_         20120131
Time          17.48
INSTRUM      AVQ-400
PROBHD       5 mm QNP 1H/13
PULPROG      zgfg1qn
TD            131072
SOLVENT      CDCl3
NS            32
DS            0
SWH           90090.094 Hz
FIDRES       0.687333 Hz
AQ            0.7275051 sec
RG            4096
DE            5.550 usec
TE            293.5 K
D1            1.0000000 sec
TD0           4

===== CHANNEL f1 =====
NUC1          13C
P1            16.00 usec
PL1           -3.00 dB
PL1W          20.04748917 W
SFO1          376.4607042 MHz
SI            65536
SF            376.4980736 MHz
WDW           EM
SSB           0
LB            2.00 Hz
GB            0
PC            4.00
  
```



JW-08-60rac/ADII-66

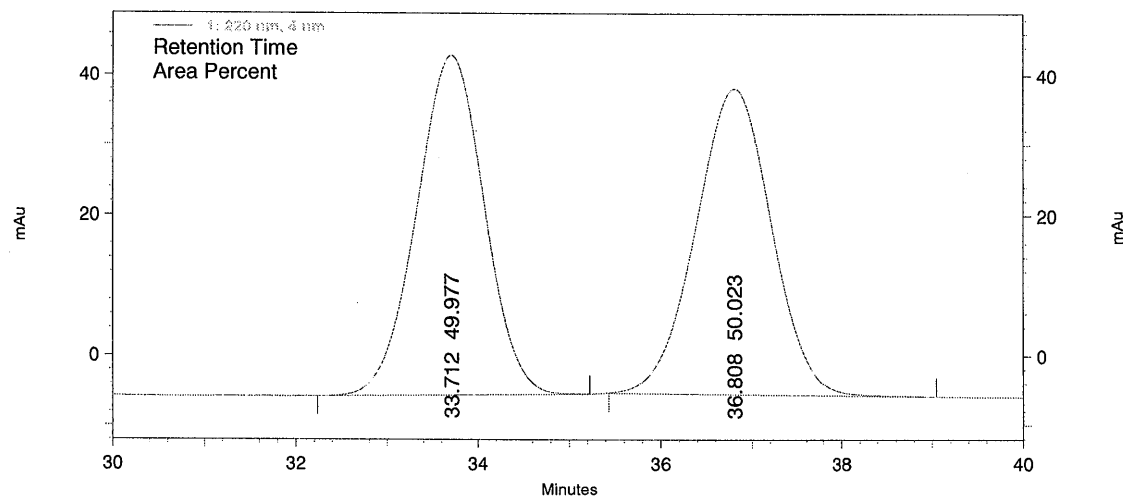

1: 220 nm, 4 nm

Results

| Pk # | Retention Time | Area Percent | Lambda Max |
|------|----------------|--------------|------------|
| 1    | 33.712         | 49.977       | 204        |
| 2    | 36.808         | 50.023       | 204        |

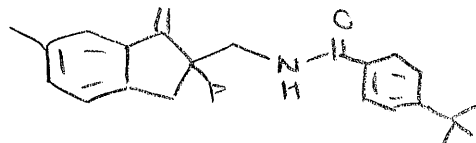

JW-08-60

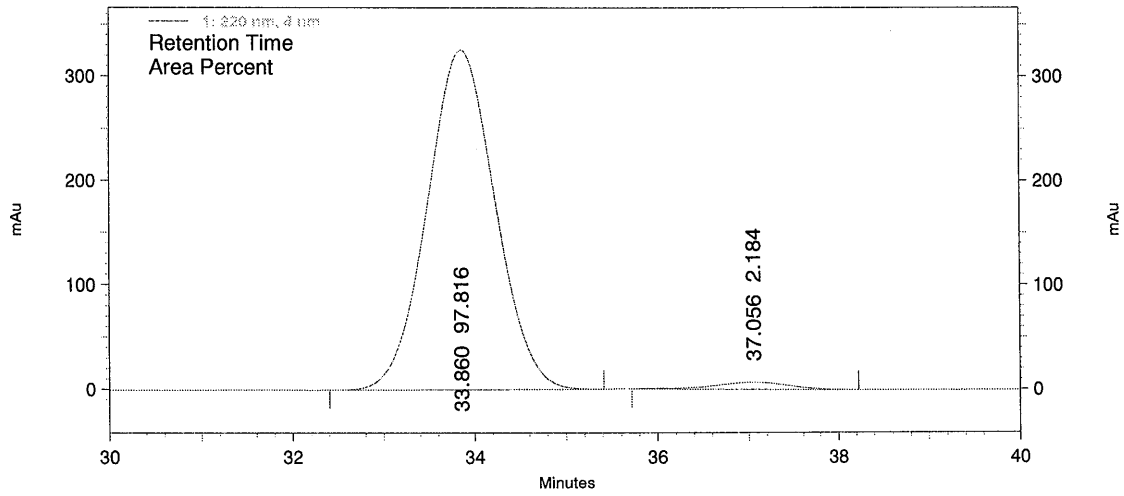

1: 220 nm, 4 nm

Results

| Pk # | Retention Time | Area Percent | Lambda Max |
|------|----------------|--------------|------------|
| 1    | 33.860         | 97.816       | 202        |
| 2    | 37.056         | 2.184        | 204        |

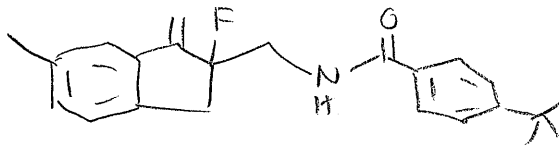

| NAME  | PPM   |
|-------|-------|
| 1.175 | 1.175 |
| 1.247 | 1.247 |
| 1.265 | 1.265 |
| 1.282 | 1.282 |
| 1.334 | 1.334 |
| 1.489 | 1.489 |
| 1.651 | 1.651 |
| 2.052 | 2.052 |
| 2.114 | 2.114 |
| 4.099 | 4.099 |
| 4.117 | 4.117 |
| 4.134 | 4.134 |
| 4.152 | 4.152 |
| 4.245 | 4.245 |
| 4.259 | 4.259 |
| 4.708 | 4.708 |
| 6.179 | 6.179 |
| 6.821 | 6.821 |
| 6.840 | 6.840 |
| 6.930 | 6.930 |
| 6.948 | 6.948 |
| 6.967 | 6.967 |
| 7.131 | 7.131 |
| 7.149 | 7.149 |
| 7.166 | 7.166 |
| 7.218 | 7.218 |
| 7.237 | 7.237 |
| 7.268 | 7.268 |
| 7.438 | 7.438 |
| 7.459 | 7.459 |
| 7.707 | 7.707 |
| 7.728 | 7.728 |

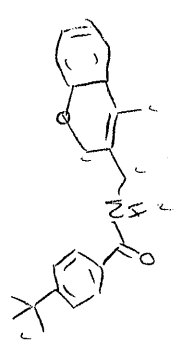

```

===== CHANNEL F1 =====
NUC1      1H
P1        12.80 use
PL1       0.00 dB
PL1W      9.54516888 W
SFO1      400.1324700 MHz
SI         65536
SF         400.1300142 MHz
WDW        EM
SSB        0
LB         0.30 Hz
GB         0
PC         4.00
  
```

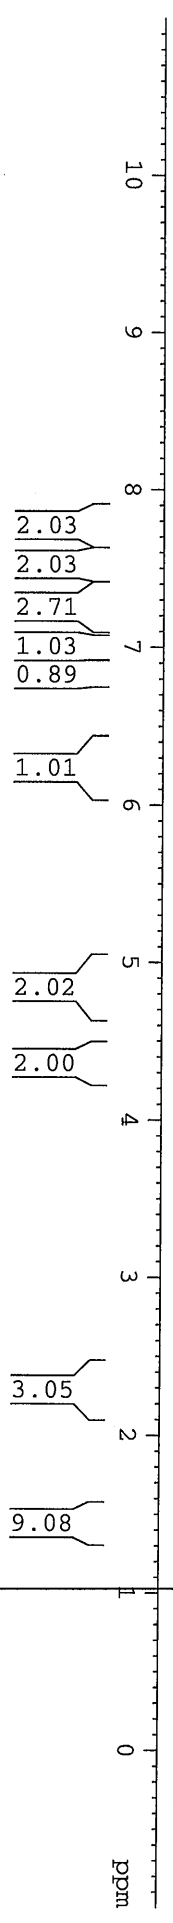

190 180 170 160 150 140 130 120 110 100 90 80 70 60 50 40 30 20 10 0 ppm

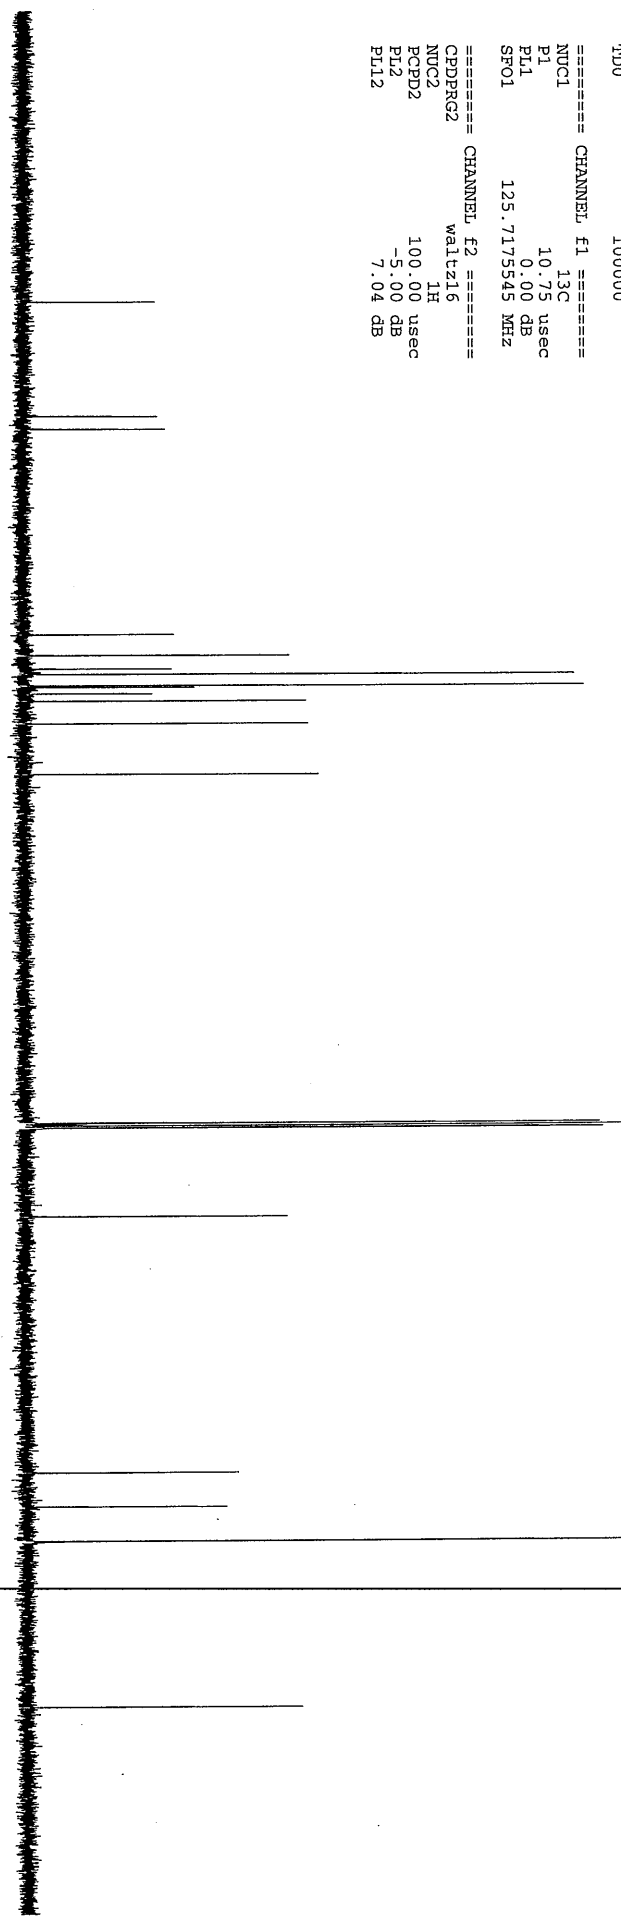

```

NAME AD-JW-8-48
EXPNO 1
PROCNO 1
Date_ 20120216
Time 14.25
INSTRUM DRX-500
PROBHD 5 mm BBO BB-1H
PULPROG zgpg30
TD 65536
SOLVENT CDCl3
NS 153
DS 0
SWH 41322.312 Hz
FIDRES 0.630528 Hz
AQ 0.7930356 sec
RG 8192
DM 12.100 usec
DE 6.00 usec
TE 292.4 K
D1 2.00000000 sec
d11 0.03000000 sec
DELTA 1.89999998 sec
TDO 100000

```

```

===== CHANNEL f1 =====
NUC1 13C
P1 10.75 usec
PL1 0.00 dB
SFO1 125.7175545 MHz

===== CHANNEL f2 =====
CPDPRG2 waltz16
NUC2 1H
PCPD2 100.00 usec
PL2 -5.00 dB
PL12 7.04 dB

```

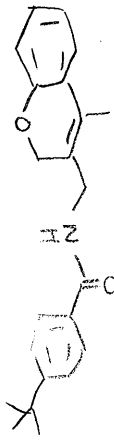

- 167.82
- 155.22
- 153.79
- 131.19
- 128.90
- 127.42
- 126.85
- 125.58
- 125.40
- 124.72
- 123.90
- 121.42
- 115.80
- 77.34
- 77.08
- 76.83
- 67.02
- 38.74
- 34.97
- 31.18
- 12.87

JW-08-203 AVB-400 ZBO Proton starting parameters. 6/11/03 RN

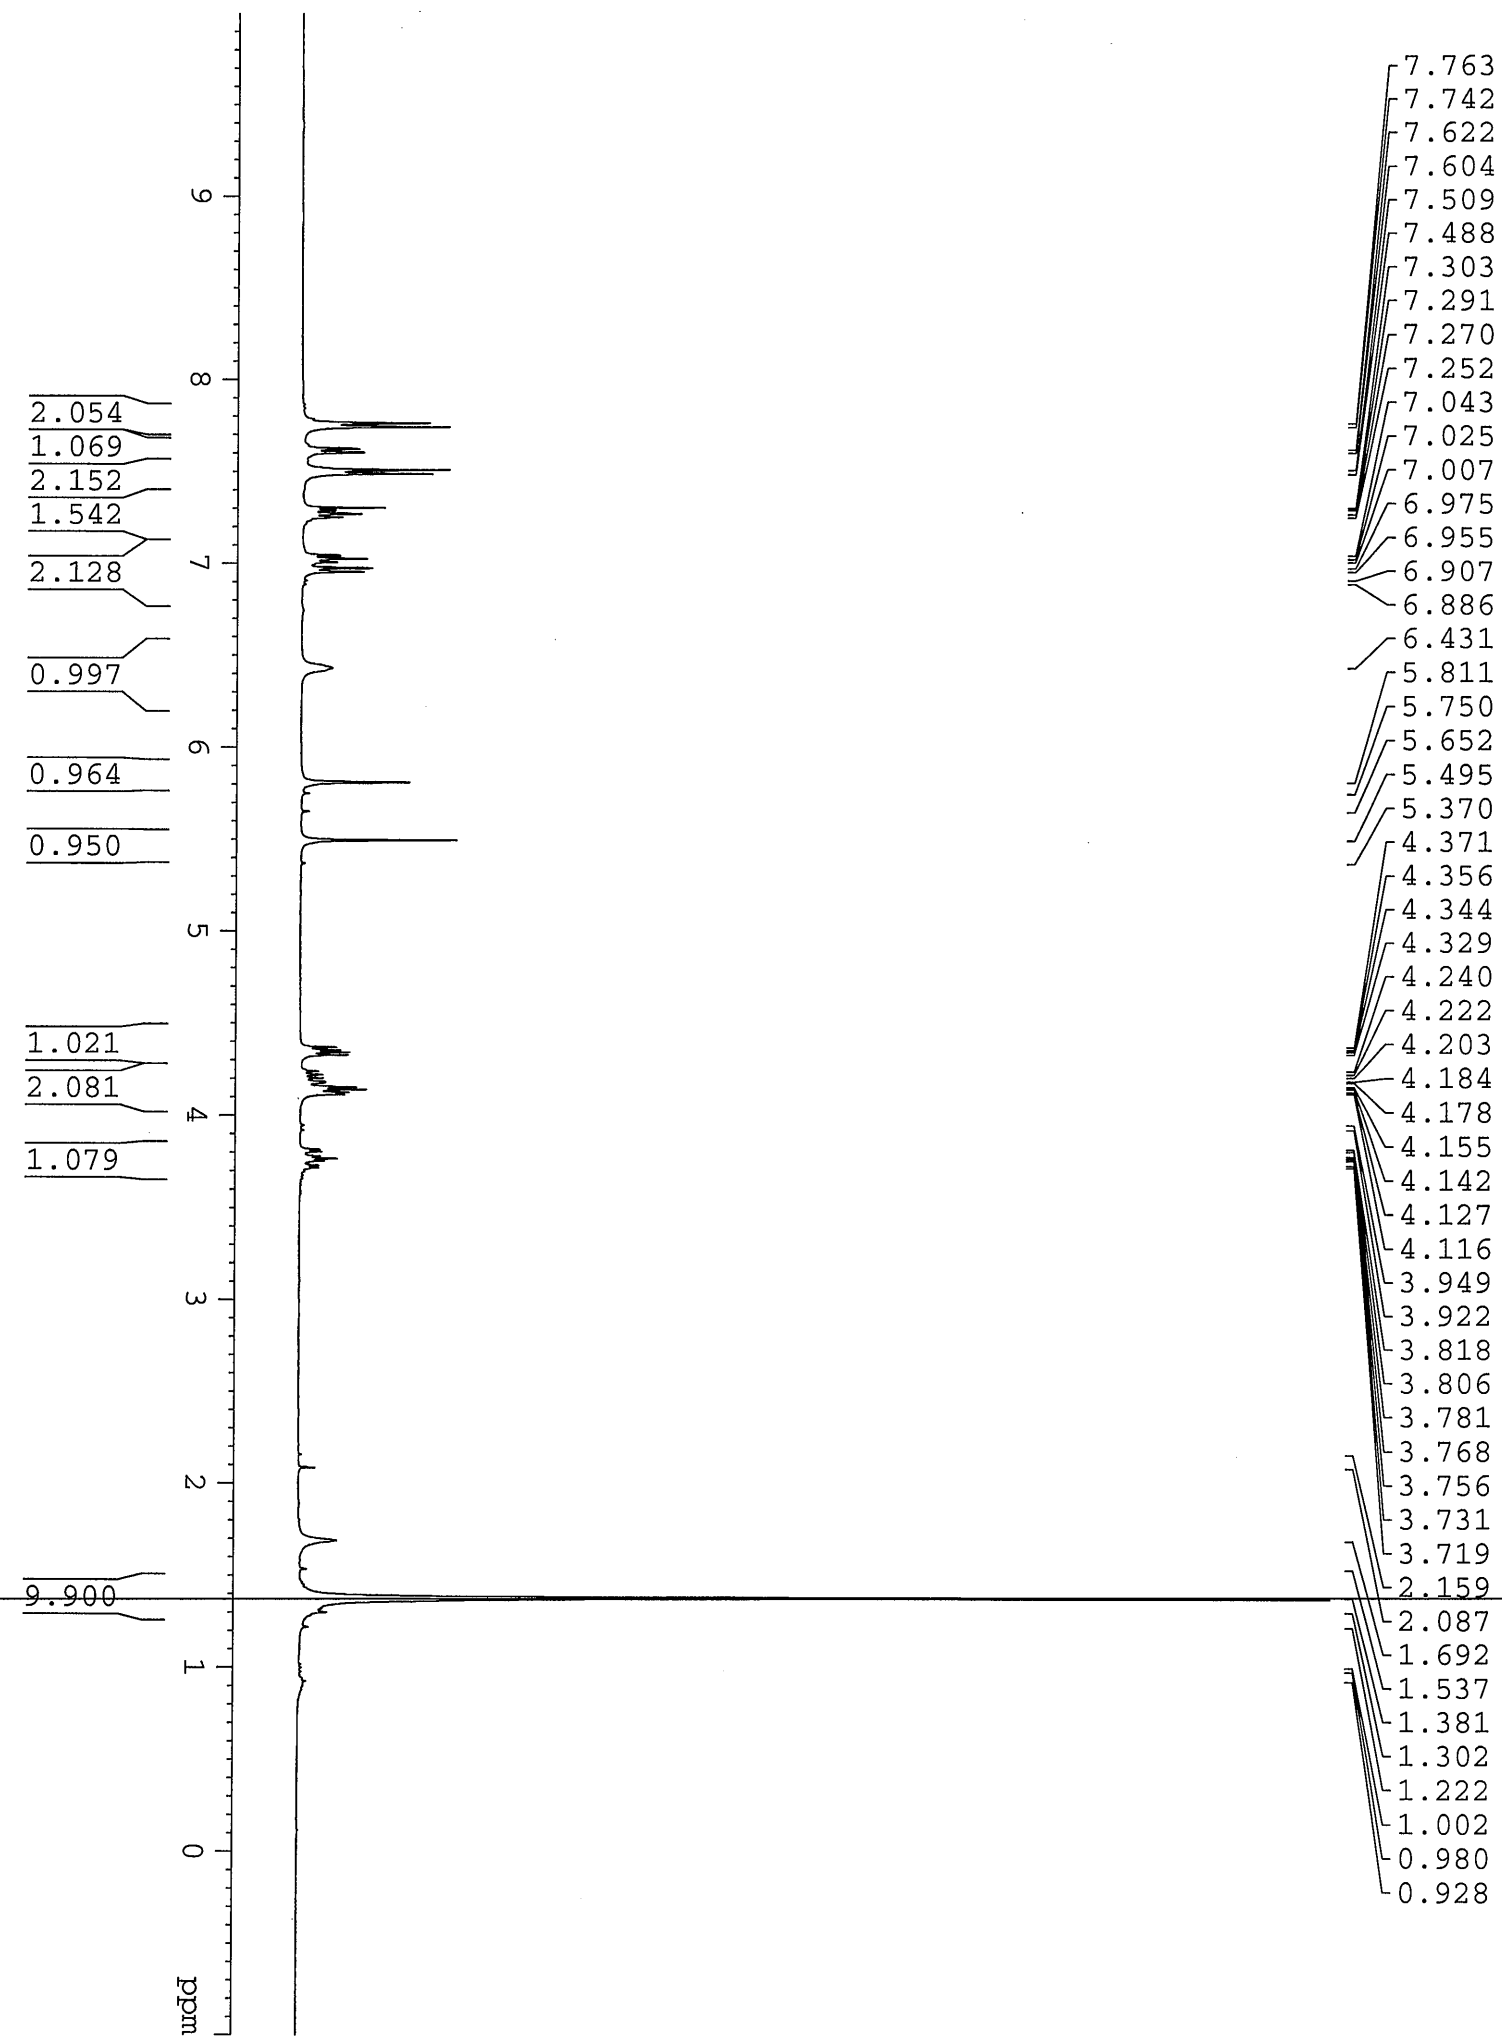

JW-08-203 AVB-400 ZBO Carbon Starting parameters 6/11/03 RN

```

NAME          JW-08-203Carb
EXPNO         1
PROCNO        1
Date_         20120508
Time_         10.53
INSTRUM       AVB-400
PROBHD        5 mm PABBO BB-
PULPROG       zgpg30
TD            65536
SOLVENT       CDCl3
NS            1581
DS            0
SMH           23980.814 Hz
FIDRES        0.365918 Hz
AQ            1.3664756 sec
RG            16384
DM            20.850 usec
DE            6.00 usec
TE            297.6 K
D1            1.50000000 sec
D11           0.03000000 sec
TD0           10000
    
```

```

===== CHANNEL F1 =====
NUC1          13C
P1            8.50 usec
PL1           -2.00 dB
PL1W          47.77286148 W
SFO1          100.628298 MHz

===== CHANNEL F2 =====
CPDPRG2      waitz16
NUC2          1H
PCPD2        70.00 usec
PL2           -3.00 dB
PL12         16.00 dB
    
```

- 167.40
- 155.33
- 152.94
- 138.56
- 138.39
- 131.22
- 130.18
- 126.86
- 125.61
- 124.66
- 121.95
- 119.34
- 117.61
- 107.39
- 107.29
- 91.69
- 89.87
- 77.36
- 77.04
- 76.73
- 68.13
- 67.83
- 43.39
- 43.15
- 34.98
- 31.17

210 200 190 180 170 160 150 140 130 120 110 100 90 80 70 60 50 40 30 20 10 0 ppm

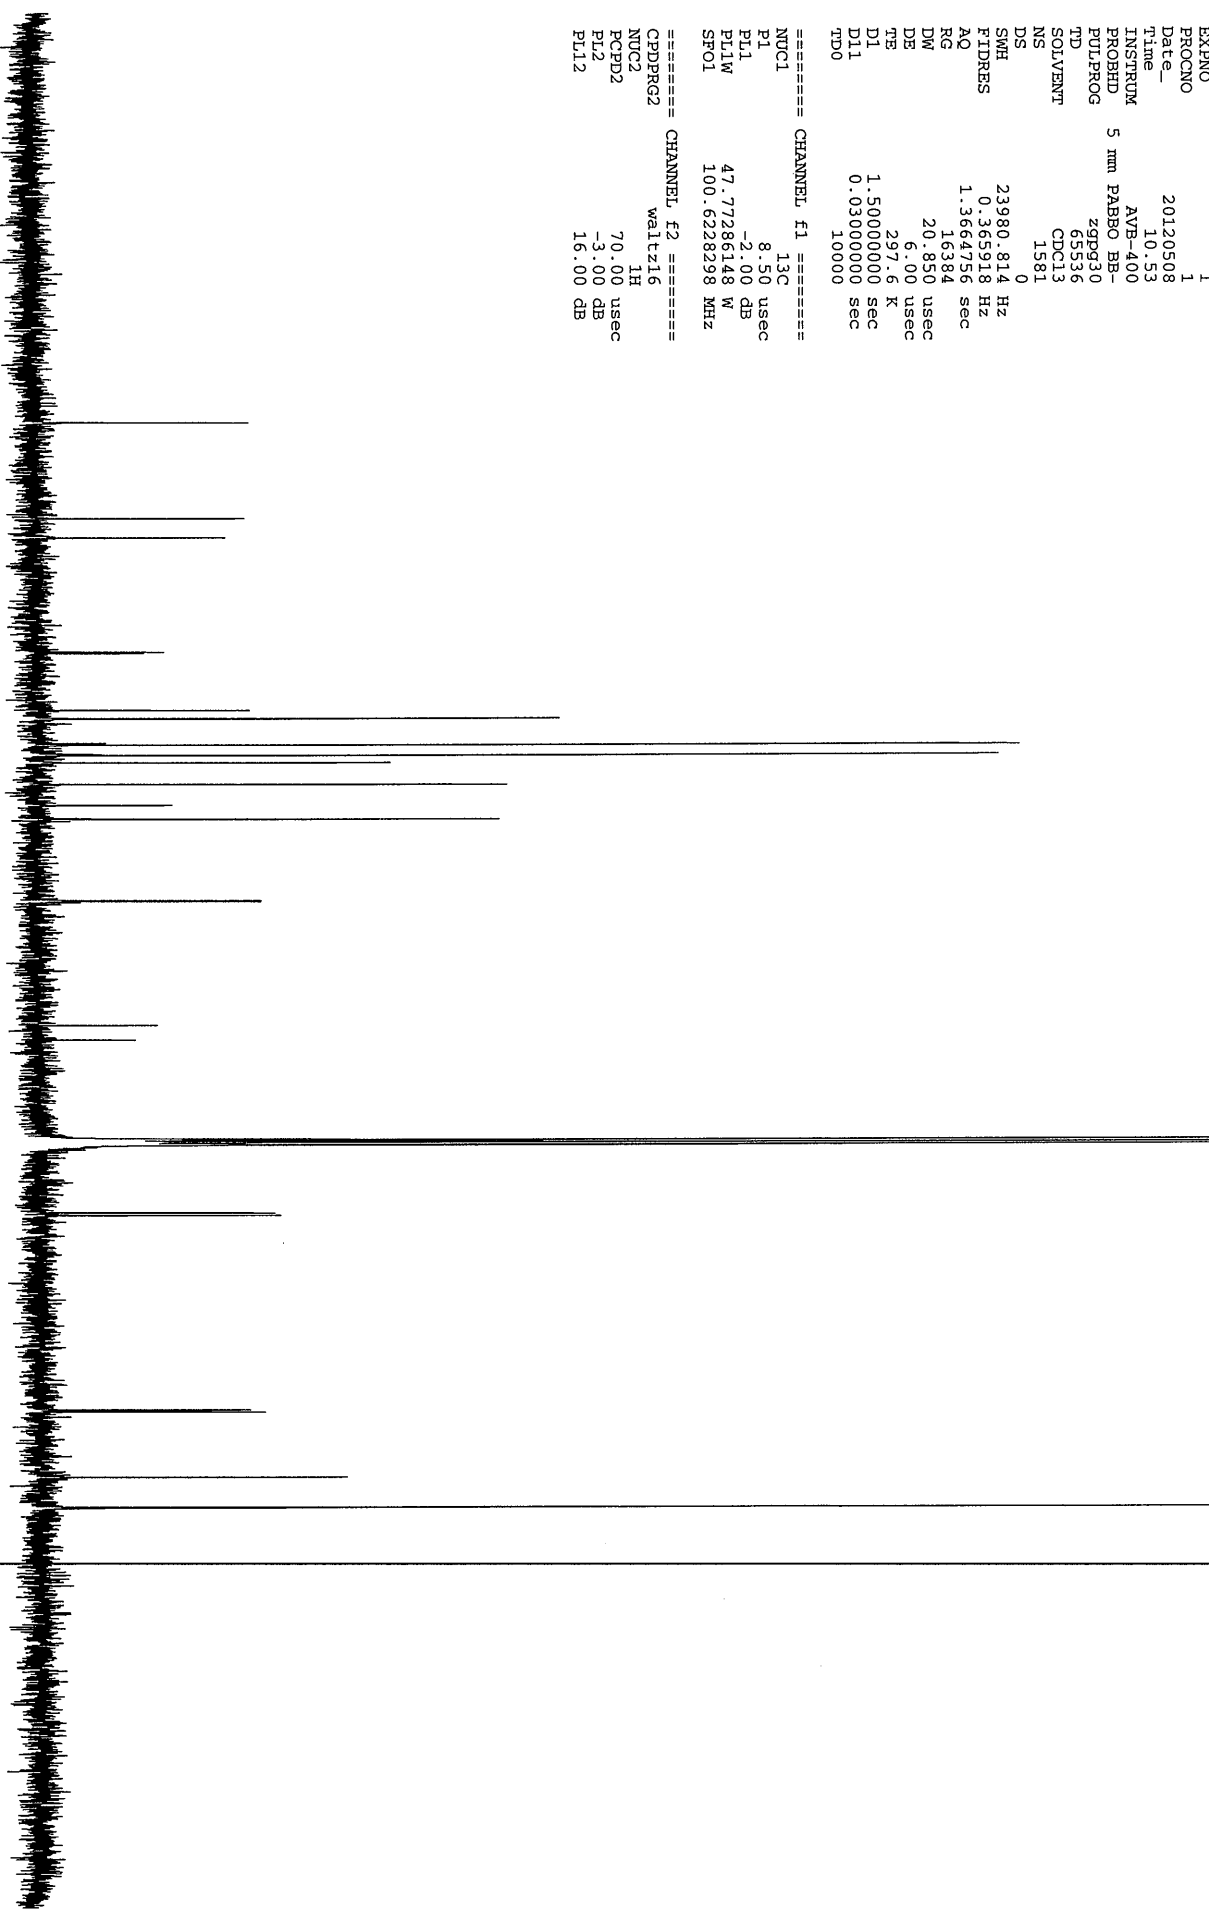

204p2 AVQ-400 QNP Probe 19F starting parameters. (rev  
 chemical shifts relative to CFCl3 at 0 ppm (082103 Hv

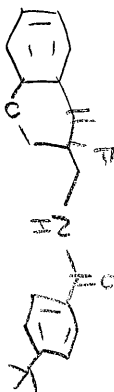

166.28  
 166.34  
 166.40

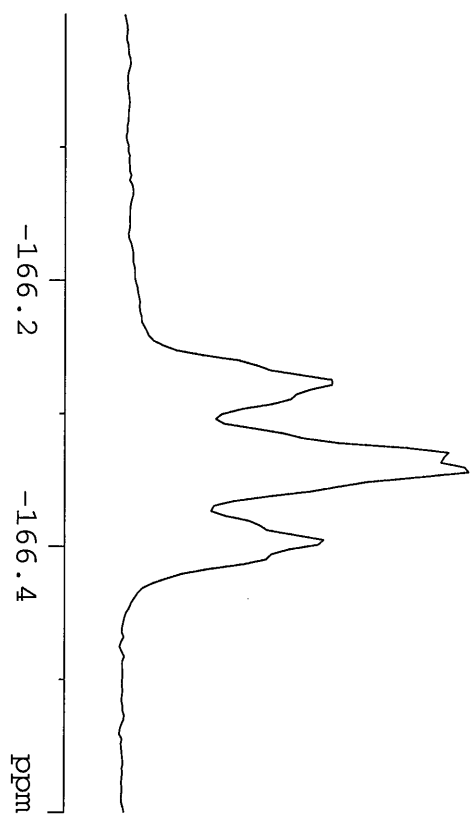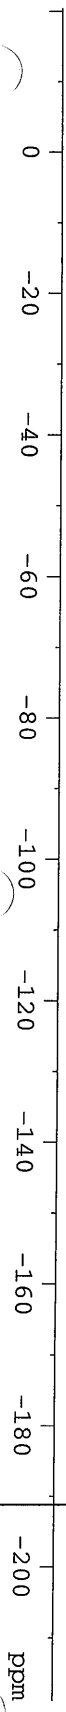

```

NAME          JW-07-204p2
EXPNO         2011121
PROCNO       10.3
Date_        AVQ-4C
Time         19.3
INSTRUM      5 mm QNP 1H/1
PROBHD       zgpg30
PULPROG      zgpg30
TD           13107
SOLVENT      CDCl3
NS           2
DS           2
SWMH         90090.05
FIDRES       0.68733
AQ           0.72750E
RG           1149.
DW           5.55
DE           6.0
TE           292.
D1           1.0000000
TD0

===== CHANNEL f1 =====
NUC1         19F
P1           16.0
PL1         -3.0
PL1W        20.0474891
SFO1        376.460704
SI           6553
SF          376.498073
WDW          E
SSB          0
LB           2.0
GB           0
PC           4.0
  
```

JW-08-59rac/07-204rac

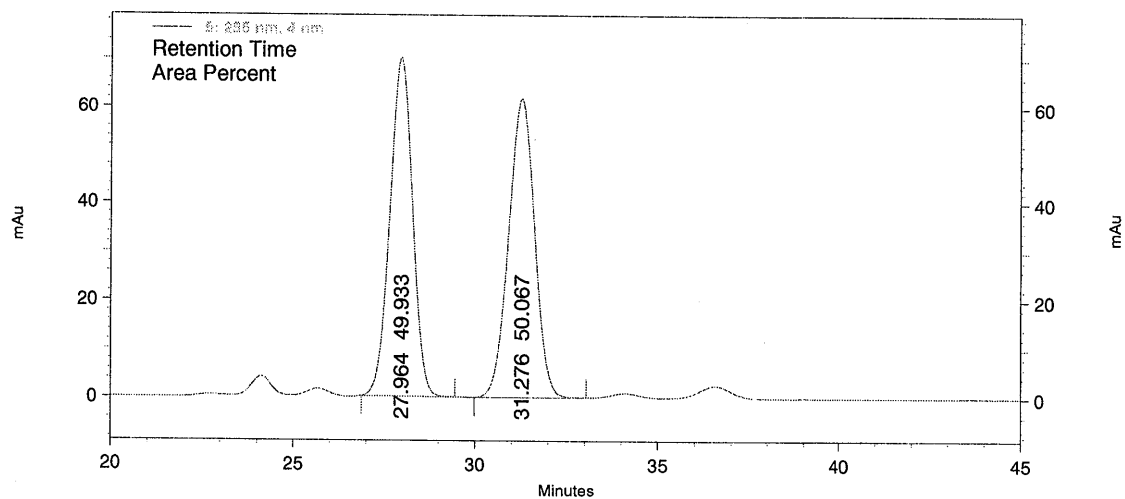

5: 255 nm, 4 nm

Results

| Pk # | Retention Time | Area Percent | Lambda Max |
|------|----------------|--------------|------------|
| 1    | 27.964         | 49.933       | 204        |
| 2    | 31.276         | 50.067       | 204        |

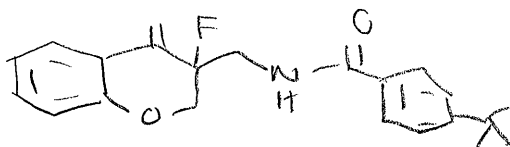



JW-08-59

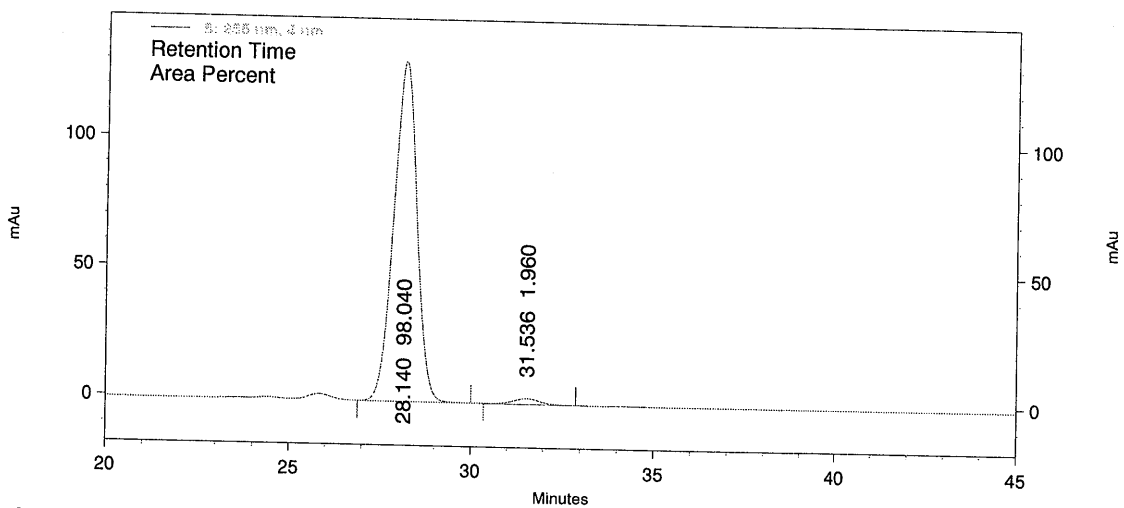

5: 255 nm, 4 nm  
Results

| Pk # | Retention Time | Area Percent | Lambda Max |
|------|----------------|--------------|------------|
| 1    | 28.140         | 98.040       | 204        |
| 2    | 31.536         | 1.960        | 205        |

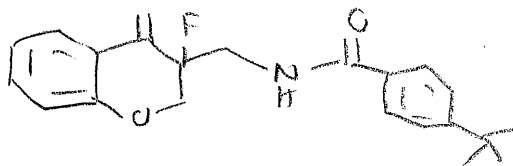

| NAME               | EXPNO | PROCNO | DATE_    | TIME  | INSTRUM | PROBHD         | PULPROG | TD    | SOLVENT | NS | DS | SMH         | FIDRES      | AQ            | RG  | DW         | DE       | TE      | D1             | TDO |
|--------------------|-------|--------|----------|-------|---------|----------------|---------|-------|---------|----|----|-------------|-------------|---------------|-----|------------|----------|---------|----------------|-----|
| JW-08-25rep-1d1r1e | 1     | 1      | 20120112 | 13.58 | av-300  | 5 mm Dual 13c/ | zg30    | 65536 | CDCl3   | 16 | 0  | 6172.839 Hz | 0.094190 Hz | 5.3084660 sec | 362 | 81.000 use | 6.00 use | 294.0 K | 0.20000000 sec | 2   |

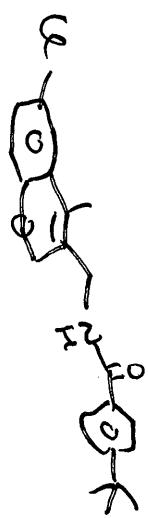

```

===== CHANNEL f1 =====
NUC1      1H
P1        11.00 use
P1L       -3.00 dB
PL1W     25.05936241 W
SF01     300.1318533 MHz
SI        32768
WDW       EM
SSB       0
LB        0.30 Hz
GB        0
PC        4.00
  
```

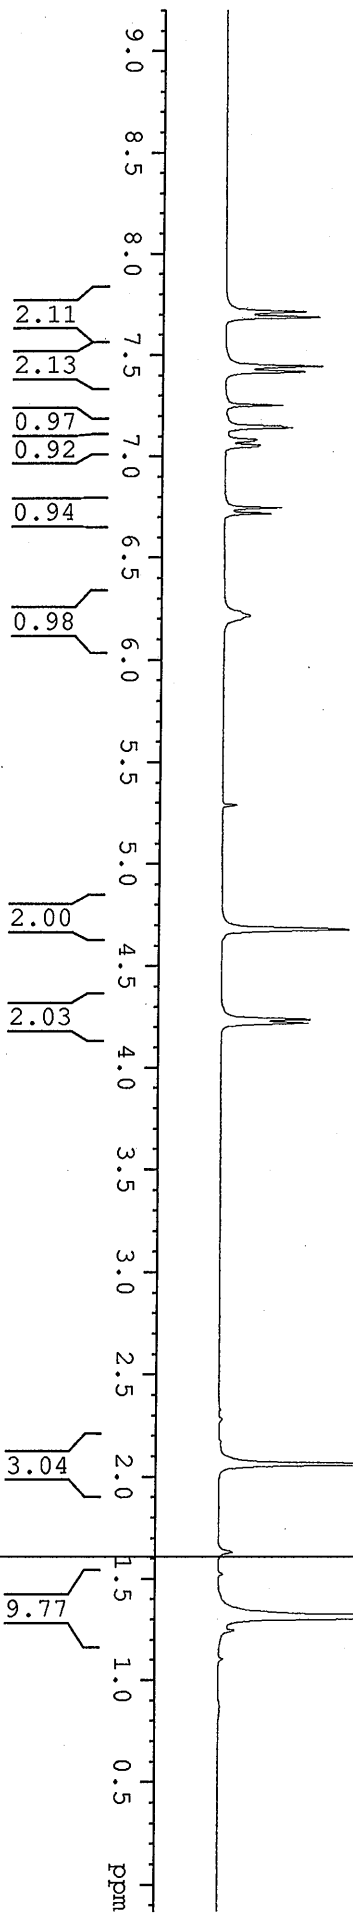

AV-300 Dual C-H probe Carbon starting parameters 7/23/03

- 167.99
- 155.61
- 152.58
- 131.31
- 128.69
- 127.05
- 126.99
- 126.79
- 126.53
- 126.37
- 125.87
- 124.06
- 117.28
- 77.72
- 77.30
- 76.87
- 67.37
- 38.87
- 35.22
- 31.41
- 13.10

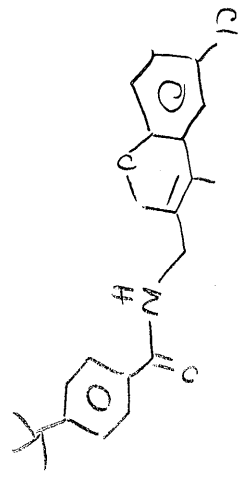

```

NAME          JW-08-25rep-plcarb
EXPNO         1
PROCNO        1
Date_         20120112
Time          14.01
INSTRUM       av-300
PROBHD        5 mm Dual 13C/
PULPROG       zgpg30
ID            zgpg30
SOLVENT       CDCl3
NS            324
DS            0
SMH           17985.611 Hz
FIDRES        0.274439 Hz
AQ            1.8219508 sec
RG            32768
DW            27.800 usec
DE            6.00 usec
TE            294.1 K
D1            1.00000000 sec
D11           0.03000000 sec
ID0           222

===== CHANNEL f1 =====
NUC1          13C
P1            10.50 usec
PL1           0.00 dB
PL1W          32.65452194 W
SFO1         75.4760505 MHz

===== CHANNEL f2 =====
CPDPRG2      waltz16
NUC2          1H
PCPD2        120.00 usec
PL2          -3.00 dB
PL12         17.76 dB
  
```

210 200 190 180 170 160 150 140 130 120 110 100 90 80 70 60 50 40 30 20 10 ppm

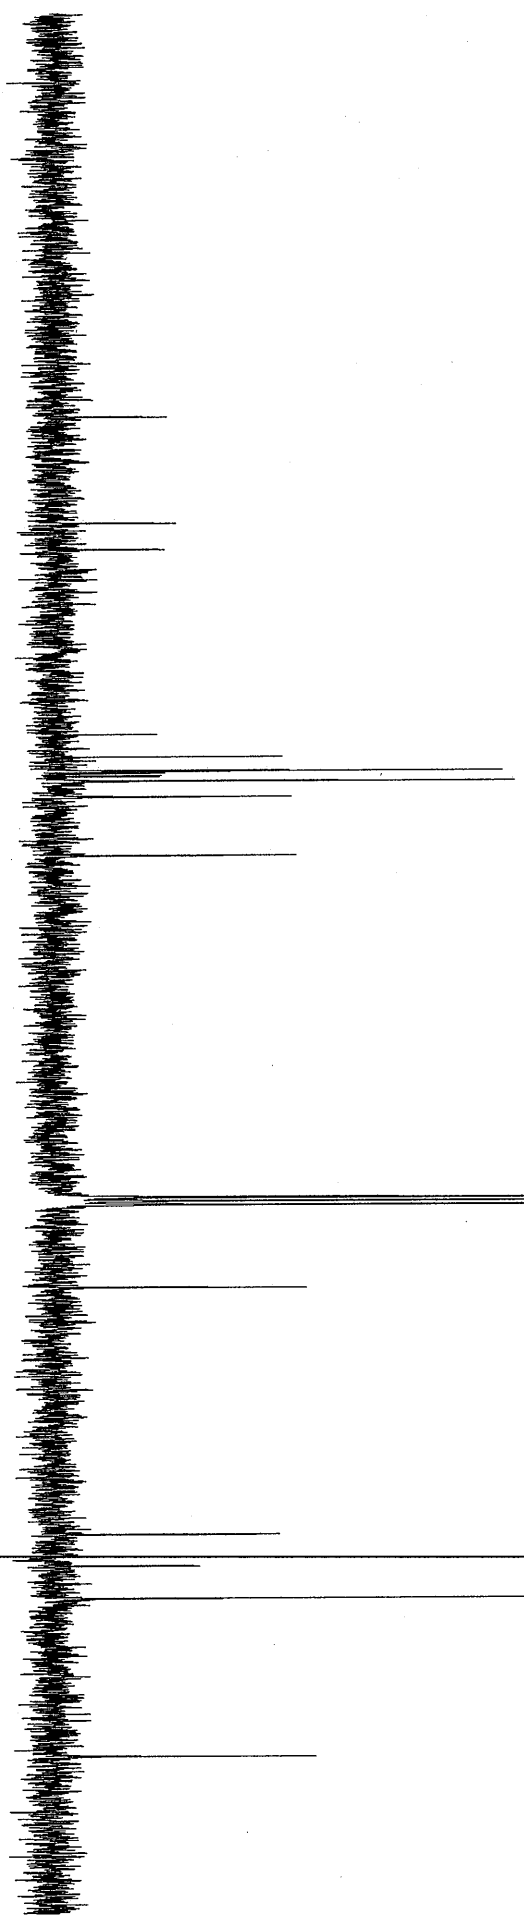

7.721  
 7.692  
 7.508  
 7.500  
 7.467  
 7.439  
 7.250  
 7.176  
 7.168  
 7.147  
 7.139  
 6.870  
 6.840  
 6.382  
 5.745  
 5.483  
 5.416  
 4.310  
 4.288  
 4.274  
 4.252  
 4.192  
 4.166  
 4.142  
 4.117  
 4.106  
 4.082  
 4.067  
 4.057  
 4.046  
 4.031  
 3.768  
 3.752  
 3.719  
 3.702  
 3.686  
 3.653  
 3.636  
 2.288  
 1.620  
 1.537  
 1.329  
 1.118  
 0.061

```

NAME          JW-08-41reprt-check
EXPNO         1
PROCNO        1
Date_         20120327
Time          10.48
INSTRUM       av-300
PROBHD        5 mm Dual 13C/
PULPROG       zg30
TD            65536
SOLVENT       CDCl3
NS            8
DS            0
SWH           6172.839 Hz
FIDRES       0.094190 Hz
AQ           5.3084660 sec
RG           456.1
DW           81.000 usec
DE           6.000 usec
TE           294.2 K
D1           0.20000000 sec
TD0          1

===== CHANNEL f1 =====
NUC1          1H
P1           11.00 usec
PL1          -3.00 dB
PL1W        25.05936241 W
SF01        300.1318533 MHz
SI          32768
SF          300.1300089 MHz
WDW          EM
SSB          0
LB           0.30 Hz
GB           0
PC           8.00
  
```

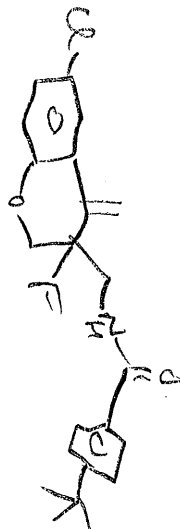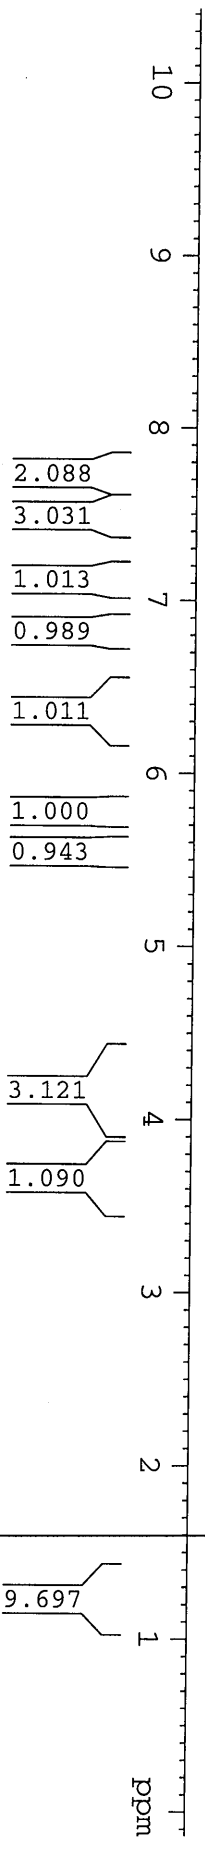

```

NAME          JW-08-41carb
EXPNO         1
PROCNO        1
Date_         20120327
Time          10:58
INSTRUM       AVB-400
PROBHD        5 mm PABBO BB-
PULPROG       zgpg30
TD            65536
SOLVENT       CDC13
NS            1418
DS            0
SWH           23980.814 Hz
FIDRES        0.365918 Hz
AQ            1.3664756 sec
RG            16384
DM            20.850 usec
DE            6.00 usec
TE            297.4 K
D1            1.50000000 sec
D11           0.03000000 sec
TD0           10000

===== CHANNEL f1 =====
NUC1          13C
P1            8.50 usec
PL1          -2.00 dB
PL1W         47.77286148 W
SFO1         100.6228298 MHz

===== CHANNEL f2 =====
CPDPRG2       waltz16
NUC2          1H
PCPD2        70.00 usec
PL2          -3.00 dB
PL12         16.00 dB
PL13         16.00 dB
PL1W         23.05461311 W
PL2W         0.29024038 W
PL13W        0.29024038 W
SFO2         400.1316005 MHz
SI            32768
SF           100.6127690 MHz
WDW           EM
SSB           0
LB            1.50 Hz
GB            0
PC            1.40

```

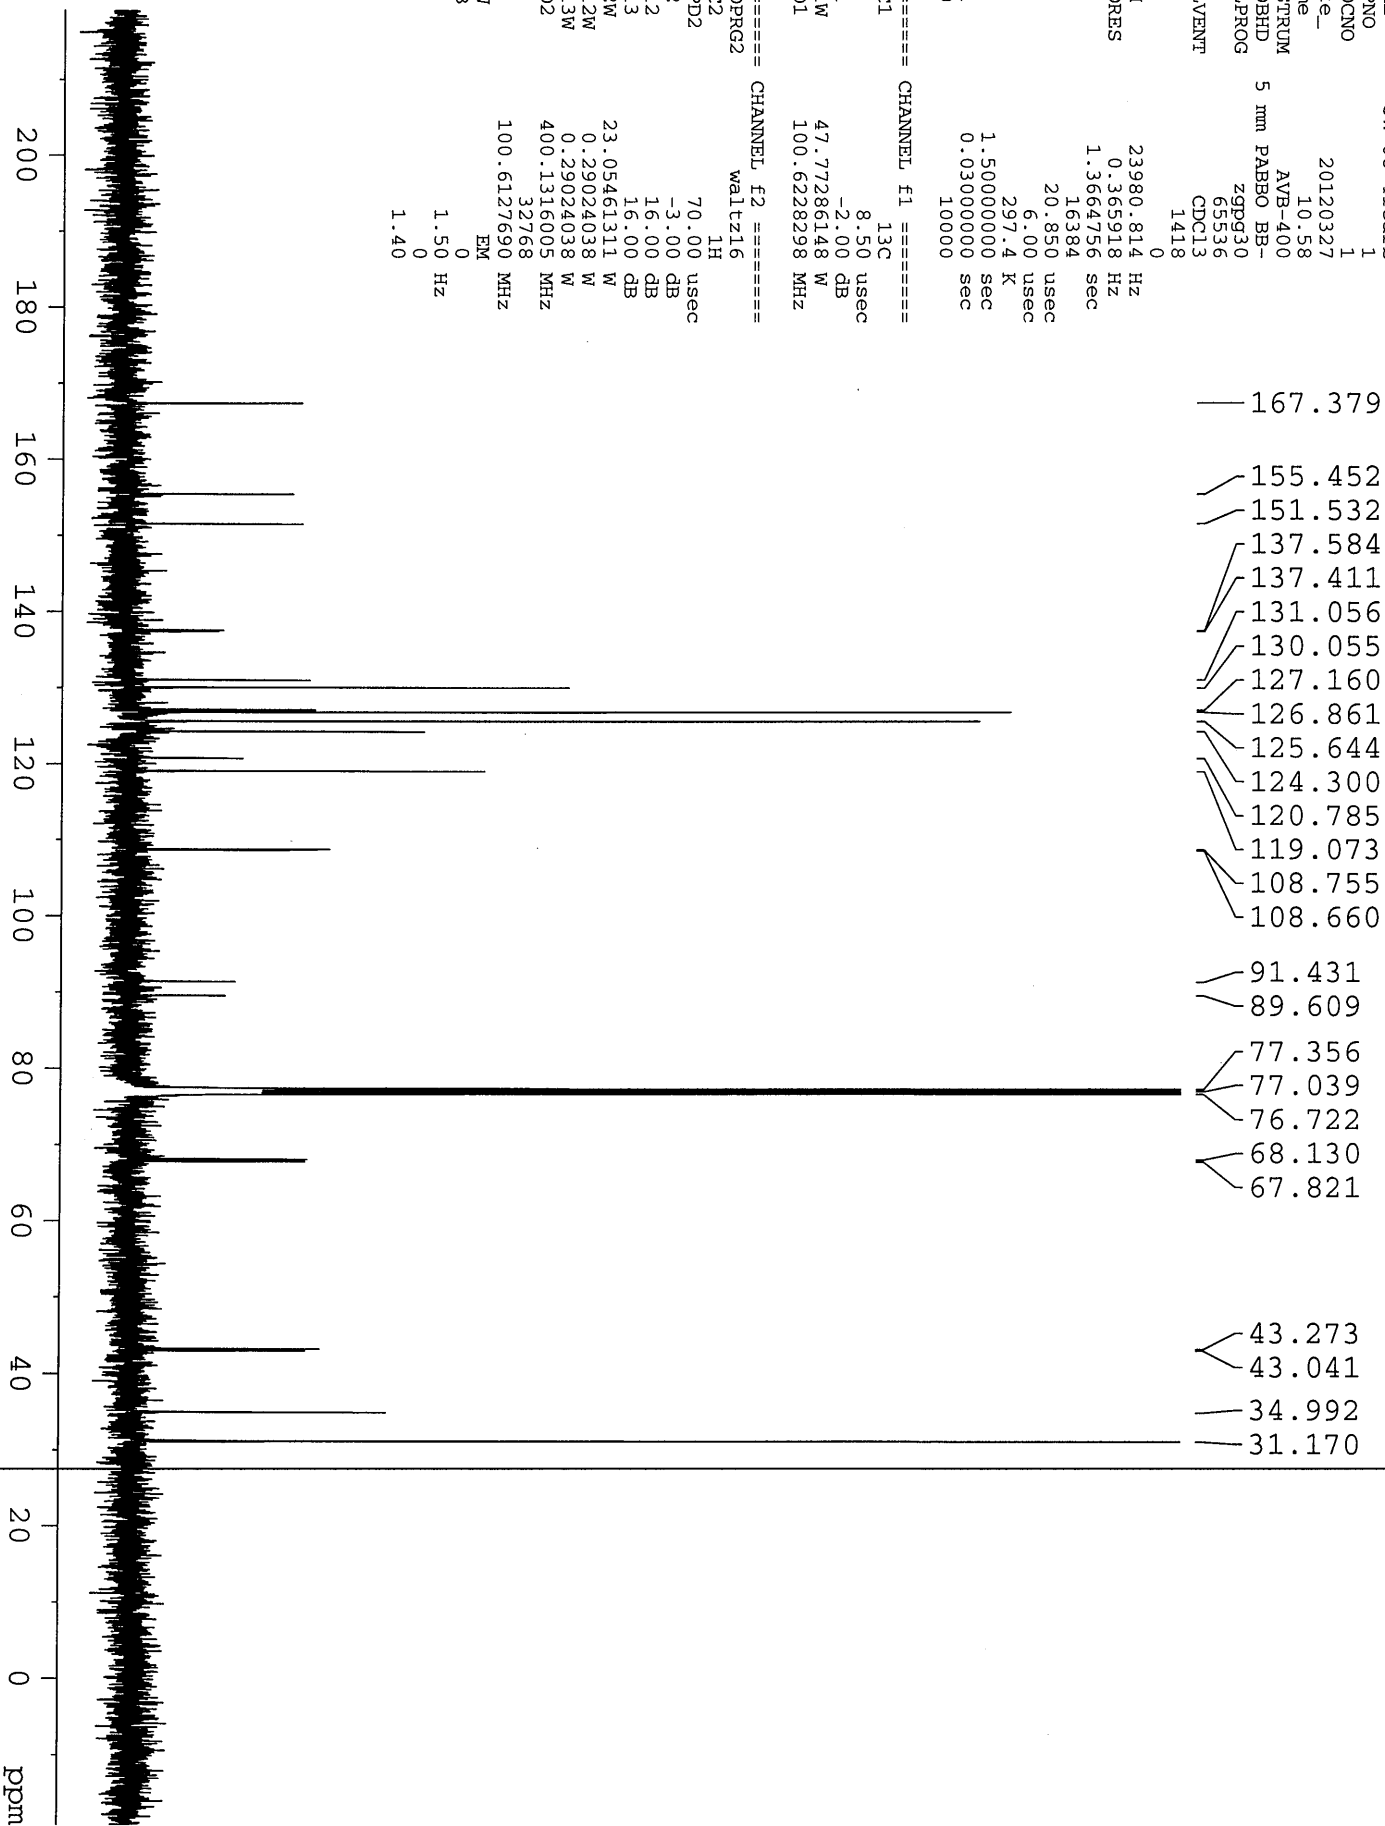

100 QNP Probe 19F starting parameters. (revised)  
 ical shifts relative to CFCl3 at 0 ppm (082103)

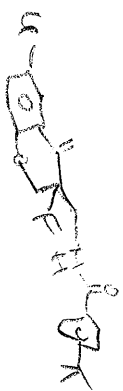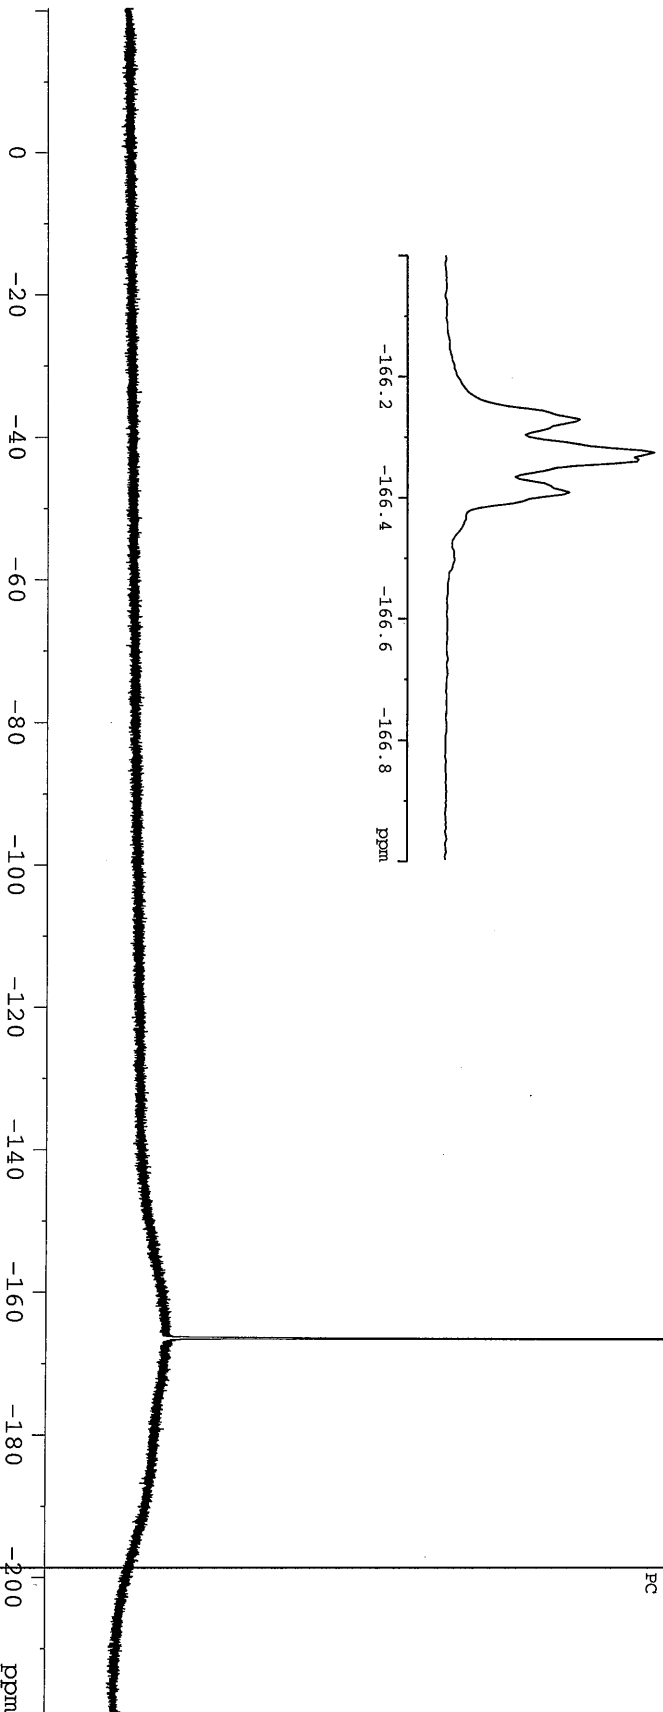

63.33  
 63.33  
 63.33  
 63.33

```

NAME          JW-08-41p1-F
EXPNO         1
PROCNO        1
Date_         20120124
Time          15.11
INSTRUM       AVO-400
PROBHD        5 mm QNP 1H/13
PULPROG       zgpg30
TD            131072
SOLVENTF1    CDCl3
NS            32
DS            0
SWH           90090.094 Hz
FIDRES        0.687333 Hz
AQ            0.7275051 sec
RG            256
DM            5.350 usec
DE            6.00 usec
TE            292.7 K
D1            1.00000000 sec
TD0           4

===== CHANNEL F1 =====
NUC1          19F
P1            16.00 usec
PL1           -3.00 dB
PL1W          20.04748917 W
SFO1          376.4607042 MHz
SI            65536
SF            376.4980736 MHz
WDW           EM
SSB           0
LB            2.00 Hz
GB            0
PC            4.00
  
```

JW-08-28rac

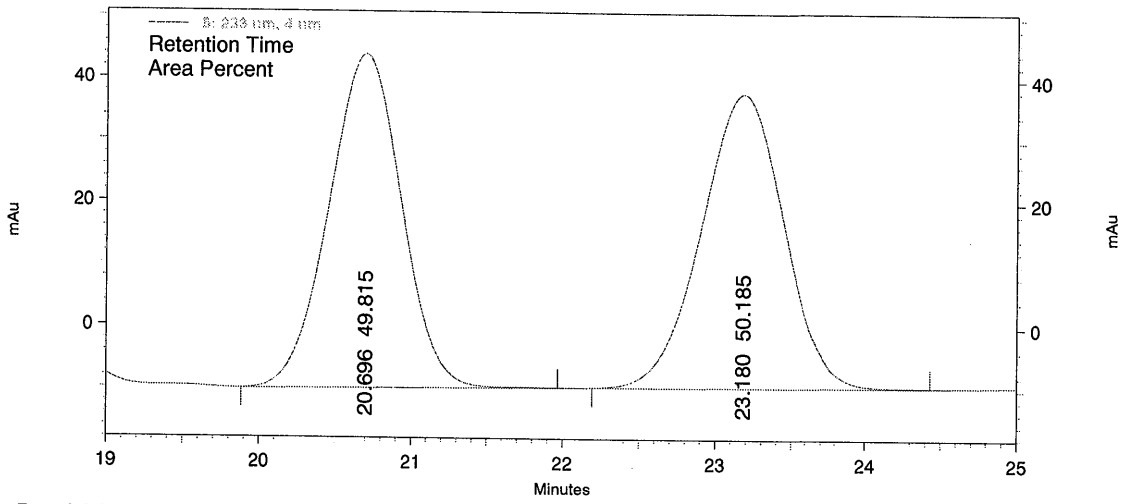

5: 233 nm, 4 nm  
Results

| Pk # | Retention Time | Area Percent | Lambda Max |
|------|----------------|--------------|------------|
| 1    | 20.696         | 49.815       | 202        |
| 2    | 23.180         | 50.185       | 202        |

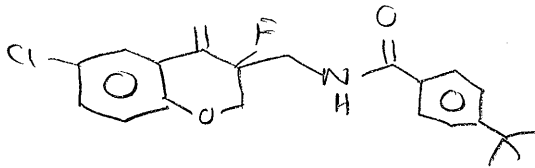

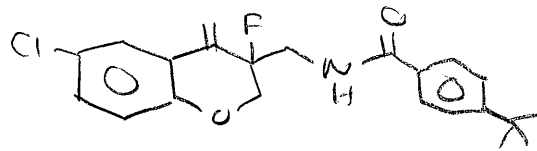

JW-08-41rt

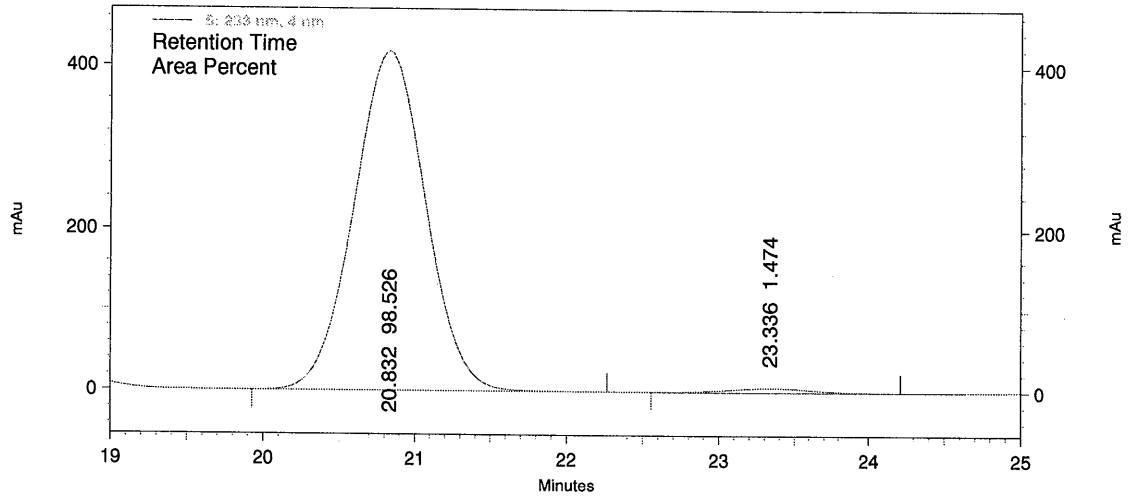

5: 233 nm, 4 nm

Results

| Pk # | Retention Time | Area Percent | Lambda Max |
|------|----------------|--------------|------------|
| 1    | 20.832         | 98.526       | 226        |
| 2    | 23.336         | 1.474        | 204        |

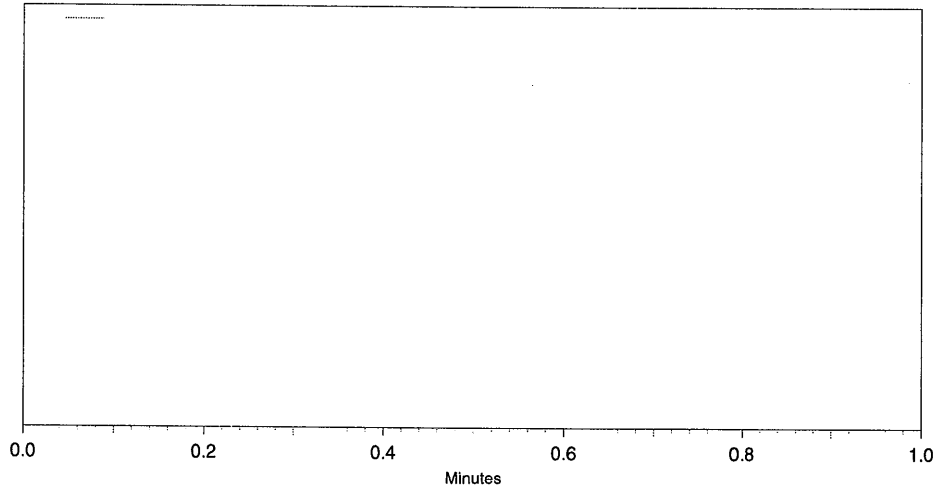

| Pk # | Retention Time | Area Percent | Lambda Max |
|------|----------------|--------------|------------|
|------|----------------|--------------|------------|



JW-08-184 AV-500 new TBI(HXP) probe  
 ID 1H starting parameters

NAME JW-08-184  
 EXPNO 1  
 PROCNO 1  
 Date\_ 20120418  
 Time 16.31  
 INSTRUM AV-500  
 PROBHD 5 mm TBI 1H/31  
 PULPROG zg30  
 TD 65536  
 SOLVENT CDCl3  
 NS 16  
 DS 0  
 SMH 10330.578 Hz  
 FIDRES 0.157632 Hz  
 AQ 3.1720407 sec  
 RG 574.7  
 DW 48.400 usec  
 DE 6.00 usec  
 TE 293.4 K  
 D1 0.10000000 sec  
 TD0 4

===== CHANNEL f1 =====  
 NUC1 1H  
 P1 7.30 usec  
 PL1 0.00 dB  
 PL1W 12.55943203 W  
 SFO1 500.2330889 MHz  
 SI 65536  
 SF 500.2300165 MHz  
 EM  
 WDW 0  
 SSB 0  
 LB 0.30 Hz  
 GB 0  
 PC 4.00

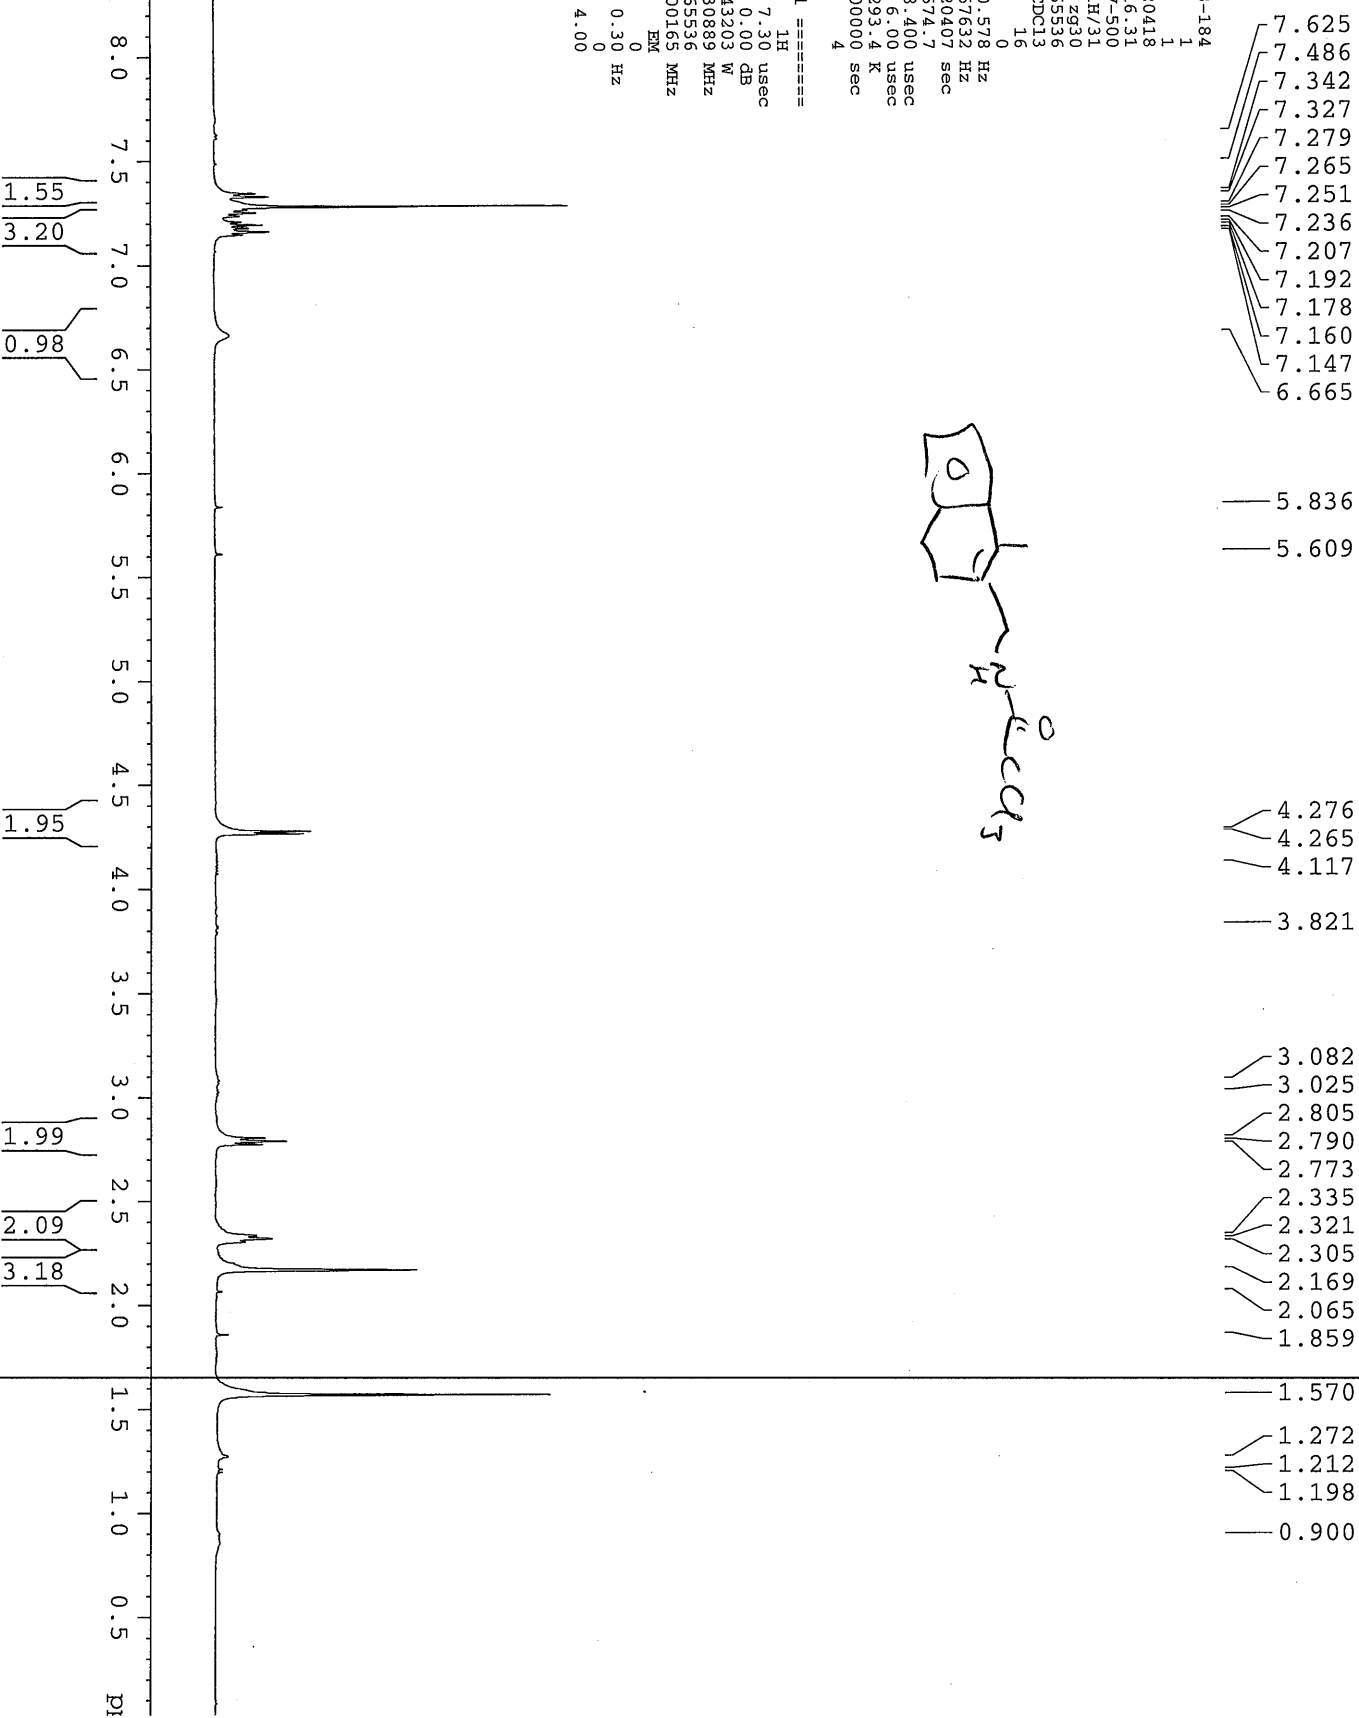

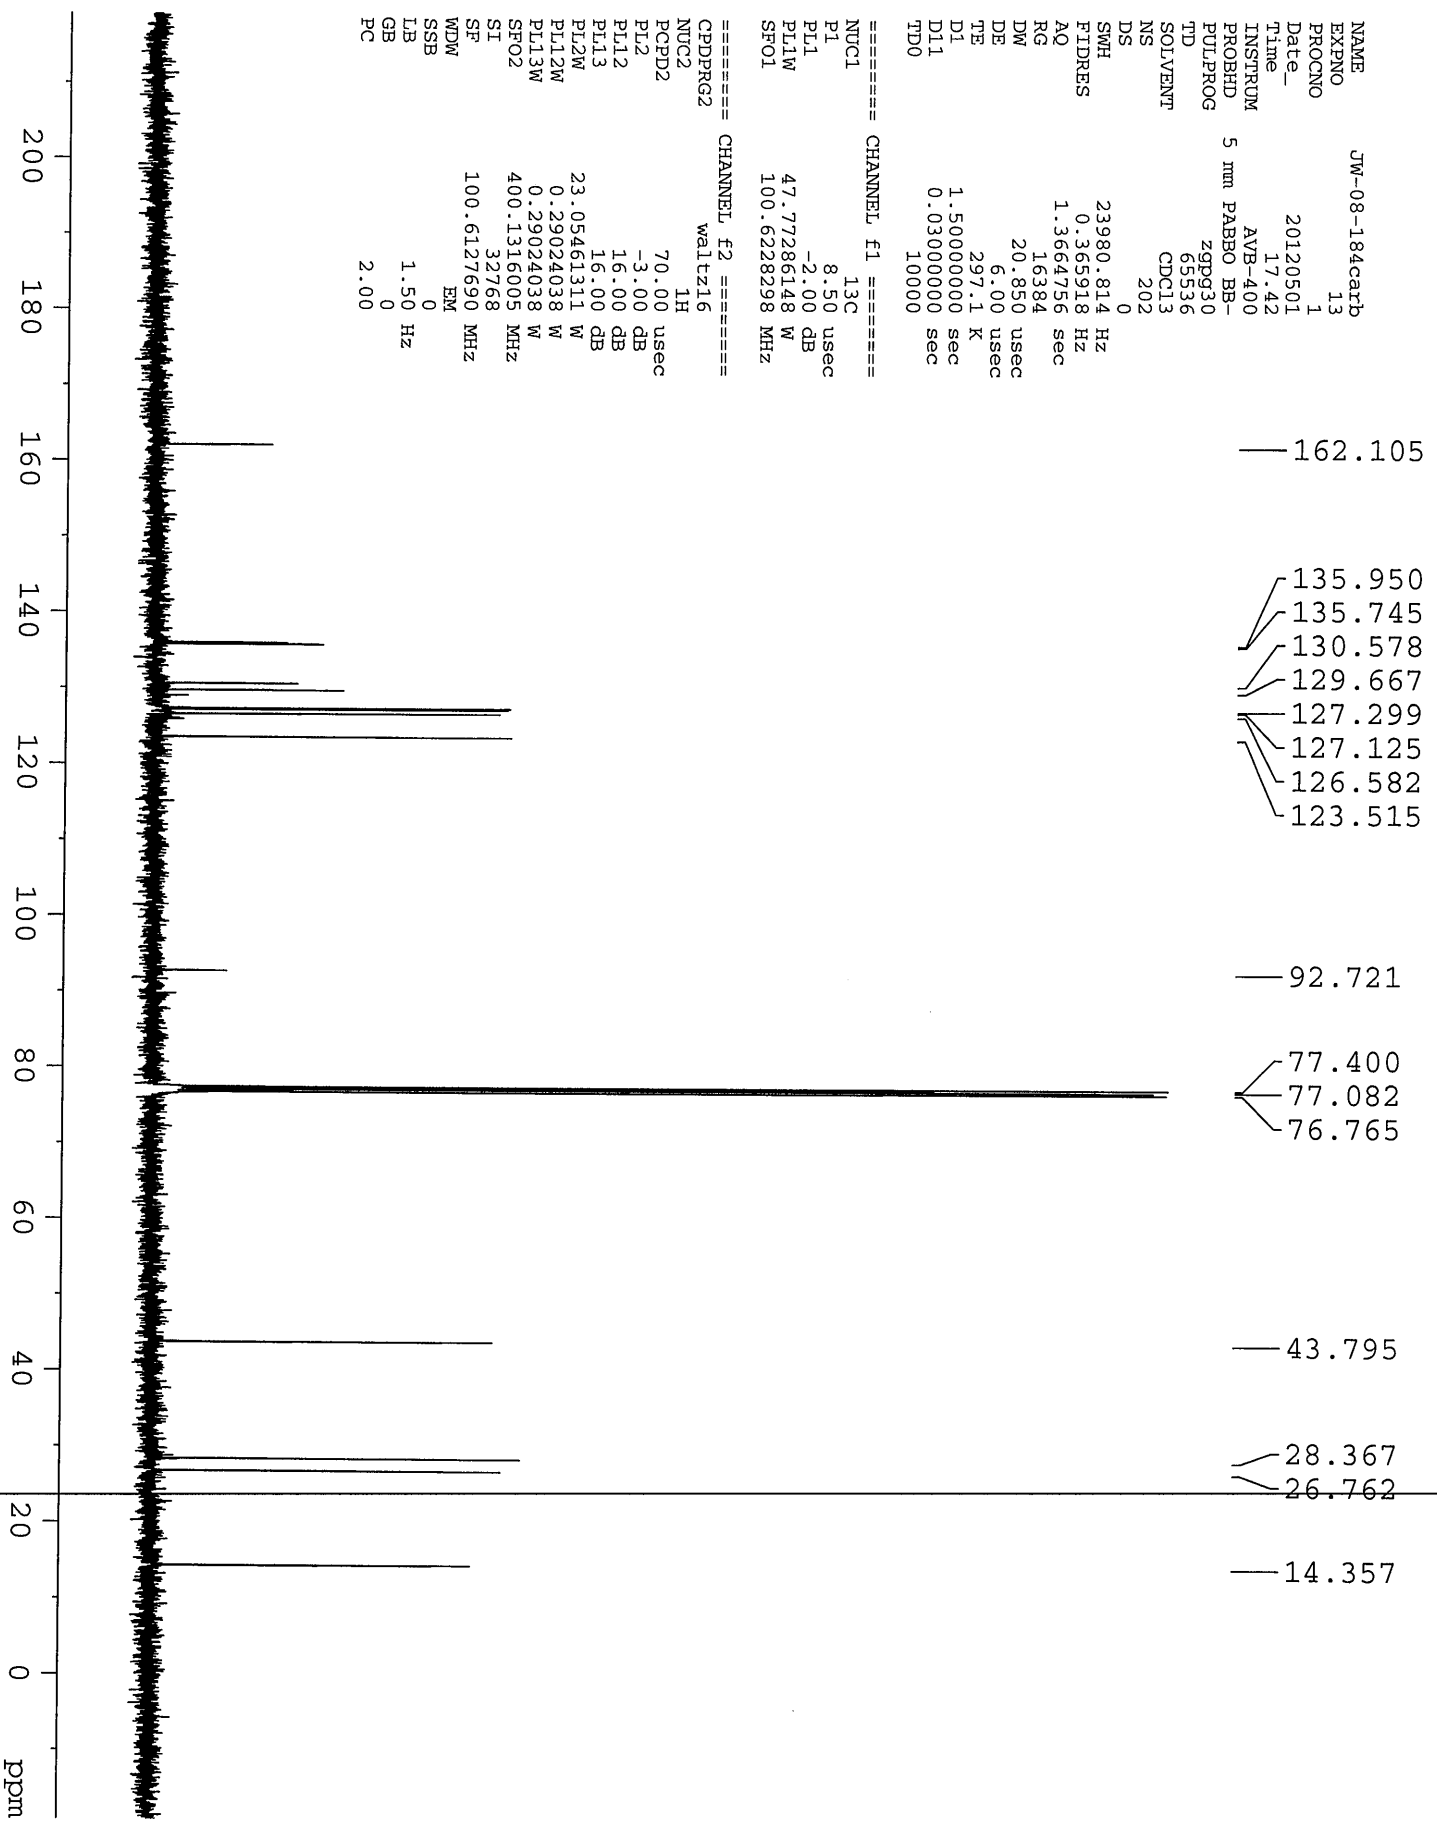

```

NAME          JW-08-184carb
EXPNO         13
PROCNO        1
Date_         20120501
Time          17.42
INSTRUM       AVB-400
PROBHD        5 mm PABBO BB-
PULPROG       zgpg30
TD            65536
SOLVENT       CDCl3
NS            202
DS            0
SWH           23980.814 Hz
FIDRES        0.365918 Hz
AQ            1.3664756 sec
RG            16384
DW            20.850 usec
DE            6.00 usec
TE            297.1 K
D1            1.5000000 sec
D11           0.0300000 sec
TD0           10000
  
```

```

===== CHANNEL f1 =====
NUC1          13C
P1            8.50 usec
PL1           -2.00 dB
PL1W          47.77286148 W
SFO1          100.6228298 MHz
  
```

```

===== CHANNEL f2 =====
CPDPRG2       wa1tz16
NUC2          1H
PCPD2         70.00 usec
PL2           -3.00 dB
PL12          16.00 dB
PL13          16.00 dB
PL1W          23.05461311 W
PL12W         0.29024038 W
PL13W         0.29024038 W
SFO2          400.1316005 MHz
SI            32768
SF            100.6127690 MHz
WDW           EM
SSB           0
LB            1.50 Hz
GB            0
PC            2.00
  
```

AV-300 Dual C-H probe proton starting parameters 7/23/03 RN.

- 7.604
- 7.581
- 7.574
- 7.264
- 7.252
- 7.247
- 7.240
- 7.235
- 7.226
- 7.217
- 7.204
- 7.186
- 7.141
- 7.134
- 7.113
- 6.977
- 5.738
- 5.727
- 5.470
- 5.290
- 3.980
- 3.953
- 3.931
- 3.905
- 3.893
- 3.866
- 3.844
- 3.818
- 3.519
- 3.505
- 3.470
- 3.456
- 3.441
- 3.407
- 3.393
- 3.093
- 3.033
- 3.002
- 2.981
- 2.221
- 2.188
- 2.166
- 2.155
- 2.132
- 1.730
- 1.676
- 1.250
- 1.189
- 1.165
- 0.875
- 0.850

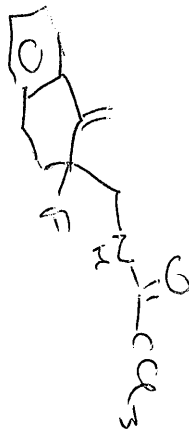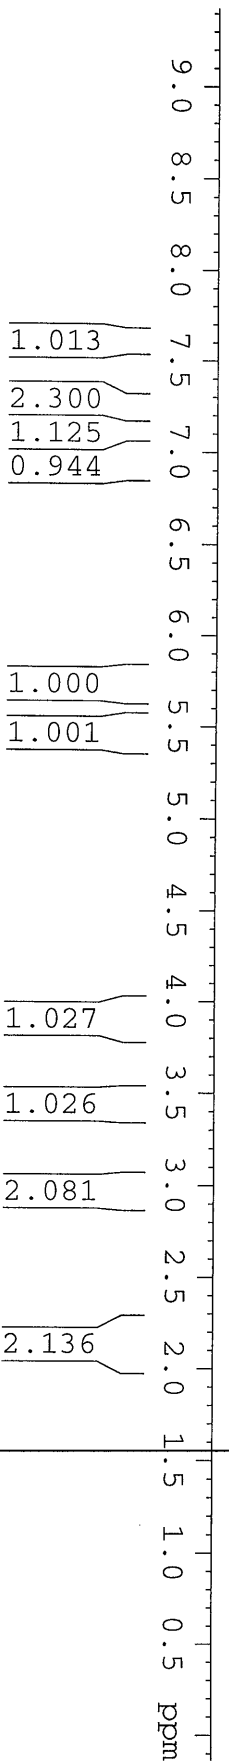

186 AVB-400 ZBO Carbon Starting parameters 6/11/03 RN

- 162.24
- 143.15
- 142.99
- 134.45
- 132.24
- 132.20
- 128.90
- 128.63
- 126.76
- 124.96
- 124.94
- 109.61
- 109.49
- 96.71
- 94.90
- 92.51
- 77.37
- 77.05
- 76.73
- 46.21
- 45.97
- 30.60
- 30.39
- 26.90
- 26.80

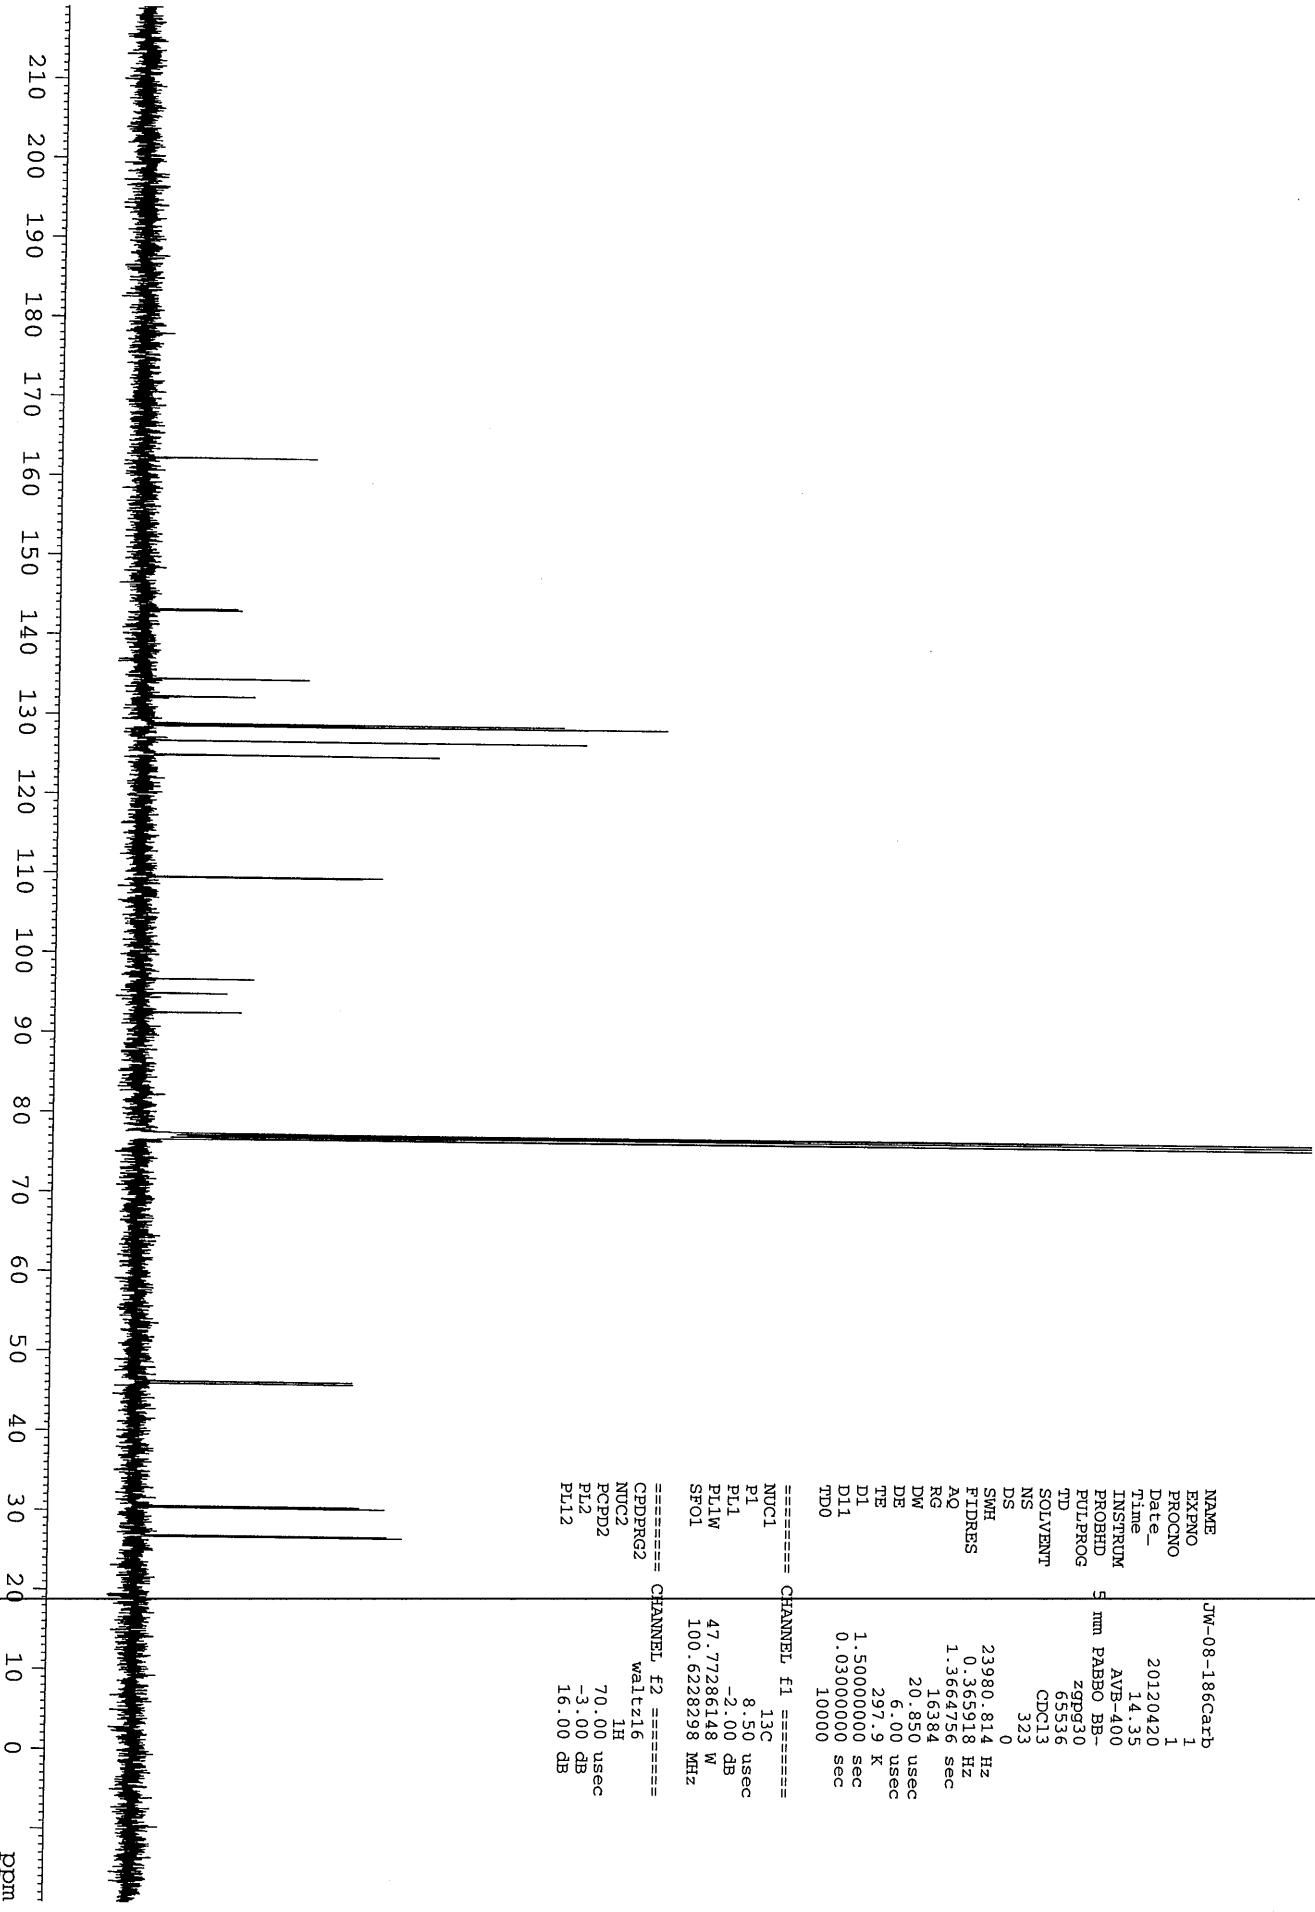

```

NAME          JW-08-186Carb
EXPNO         1
PROCNO        1
Date_         20120420
Time         14.35
INSTRUM       AVB-400
PROBHD        5 mm PABBO BB-
PULPROG       zgpg30
TD            65536
SOLVENT       CDCl3
DS            323
SMH           0
FIDRES       23980.814 Hz
AQ           0.365918 Hz
RG           1.3664756 sec
DE           16384
DW           20.850 usec
TE           6.00 usec
D1           297.9 K
D11          1.50000000 sec
TD0          0.03000000 sec
            10000

===== CHANNEL f1 =====
NUC1         13C
P1           8.50 usec
PL1         -2.00 dB
PL1W        47.77286148 W
SFO1        100.62828298 MHz

===== CHANNEL f2 =====
CPDPRG2      waltz16
NUC2         1H
PCPD2       70.00 usec
PL2         -3.00 dB
PL12        16.00 dB
    
```

3 p AVQ-400 QNP Probe 19F starting parameters. (revised P1, 2/12/04)  
 chemical shifts relative to CFCl3 at 0 ppm (082103 HVH)  
 sw 239.28 ppm; o1p 0 ppm

```

NAME      JW-ADcc13P-F
EXPNO     1
PROCNO    1
Date_     20120518
Time      11.20
INSTRUM   AVQ-400
PROBHD    5 mm QNP 1H/13
PULPROG   zgfg1gm
TD         131072
SOLVENTF  CDCl3
NS         32
DS         0
SWH        90090.094 Hz
FIDRES     0.687333 Hz
AQ         0.7275051 sec
RG         256
DM         5.550 usec
DE         6.00 usec
TE         292.6 K
D1         1.00000000 sec
TD0        4
  
```

```

===== CHANNEL f1 =====
NUC1      19F
P1        16.00 usec
PL1       -3.00 dB
PL1W      20.04748917 W
SFO1      376.4607042 MHz
SI         65536
SF        376.4980736 MHz
WDW        EM
SSB        0
LB         2.00 Hz
GB         0
PC         4.00
  
```

-150.59

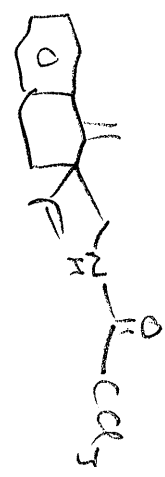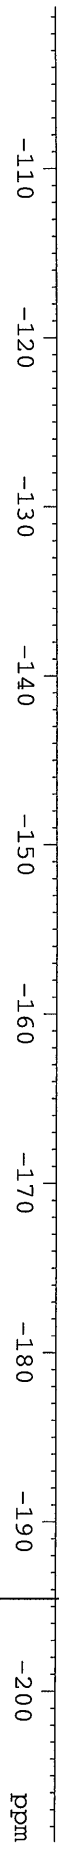

JW-08-117rac IC9802\_30min

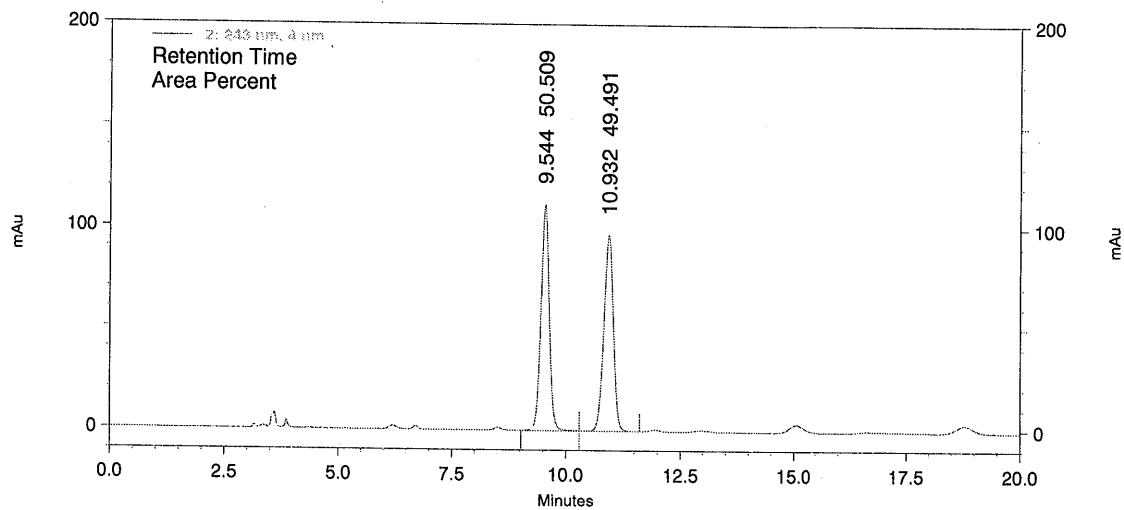

2: 243 nm, 4 nm  
Results

| Pk # | Retention Time | Area Percent | Lambda Max |
|------|----------------|--------------|------------|
| 1    | 9.544          | 50.509       | 209        |
| 2    | 10.932         | 49.491       | 209        |

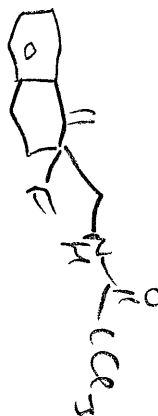

JW-08-121 IC9802\_30min

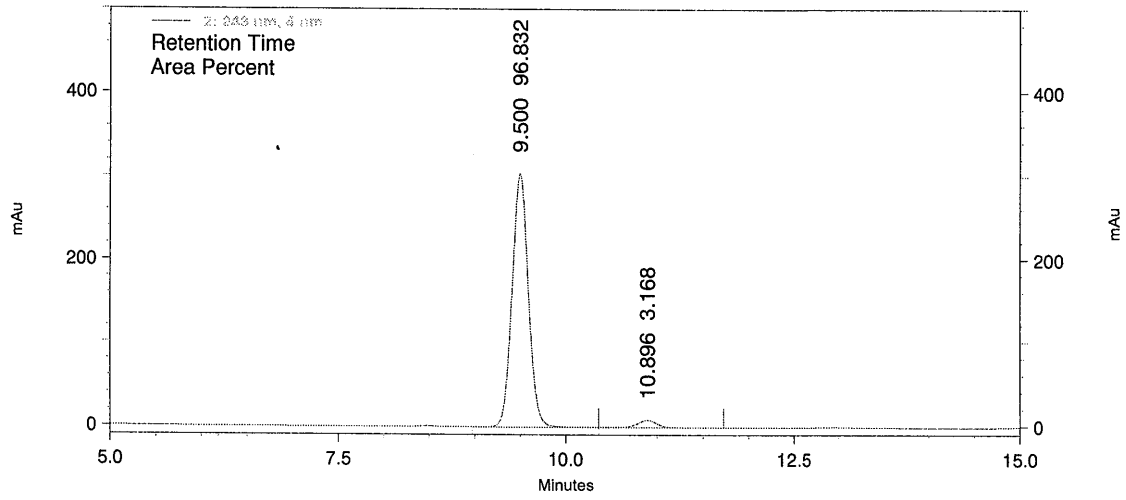

2: 243 nm, 4 nm

Results

| Pk # | Retention Time | Area Percent | Lambda Max |
|------|----------------|--------------|------------|
| 1    | 9.500          | 96.832       | 209        |
| 2    | 10.896         | 3.168        | 210        |

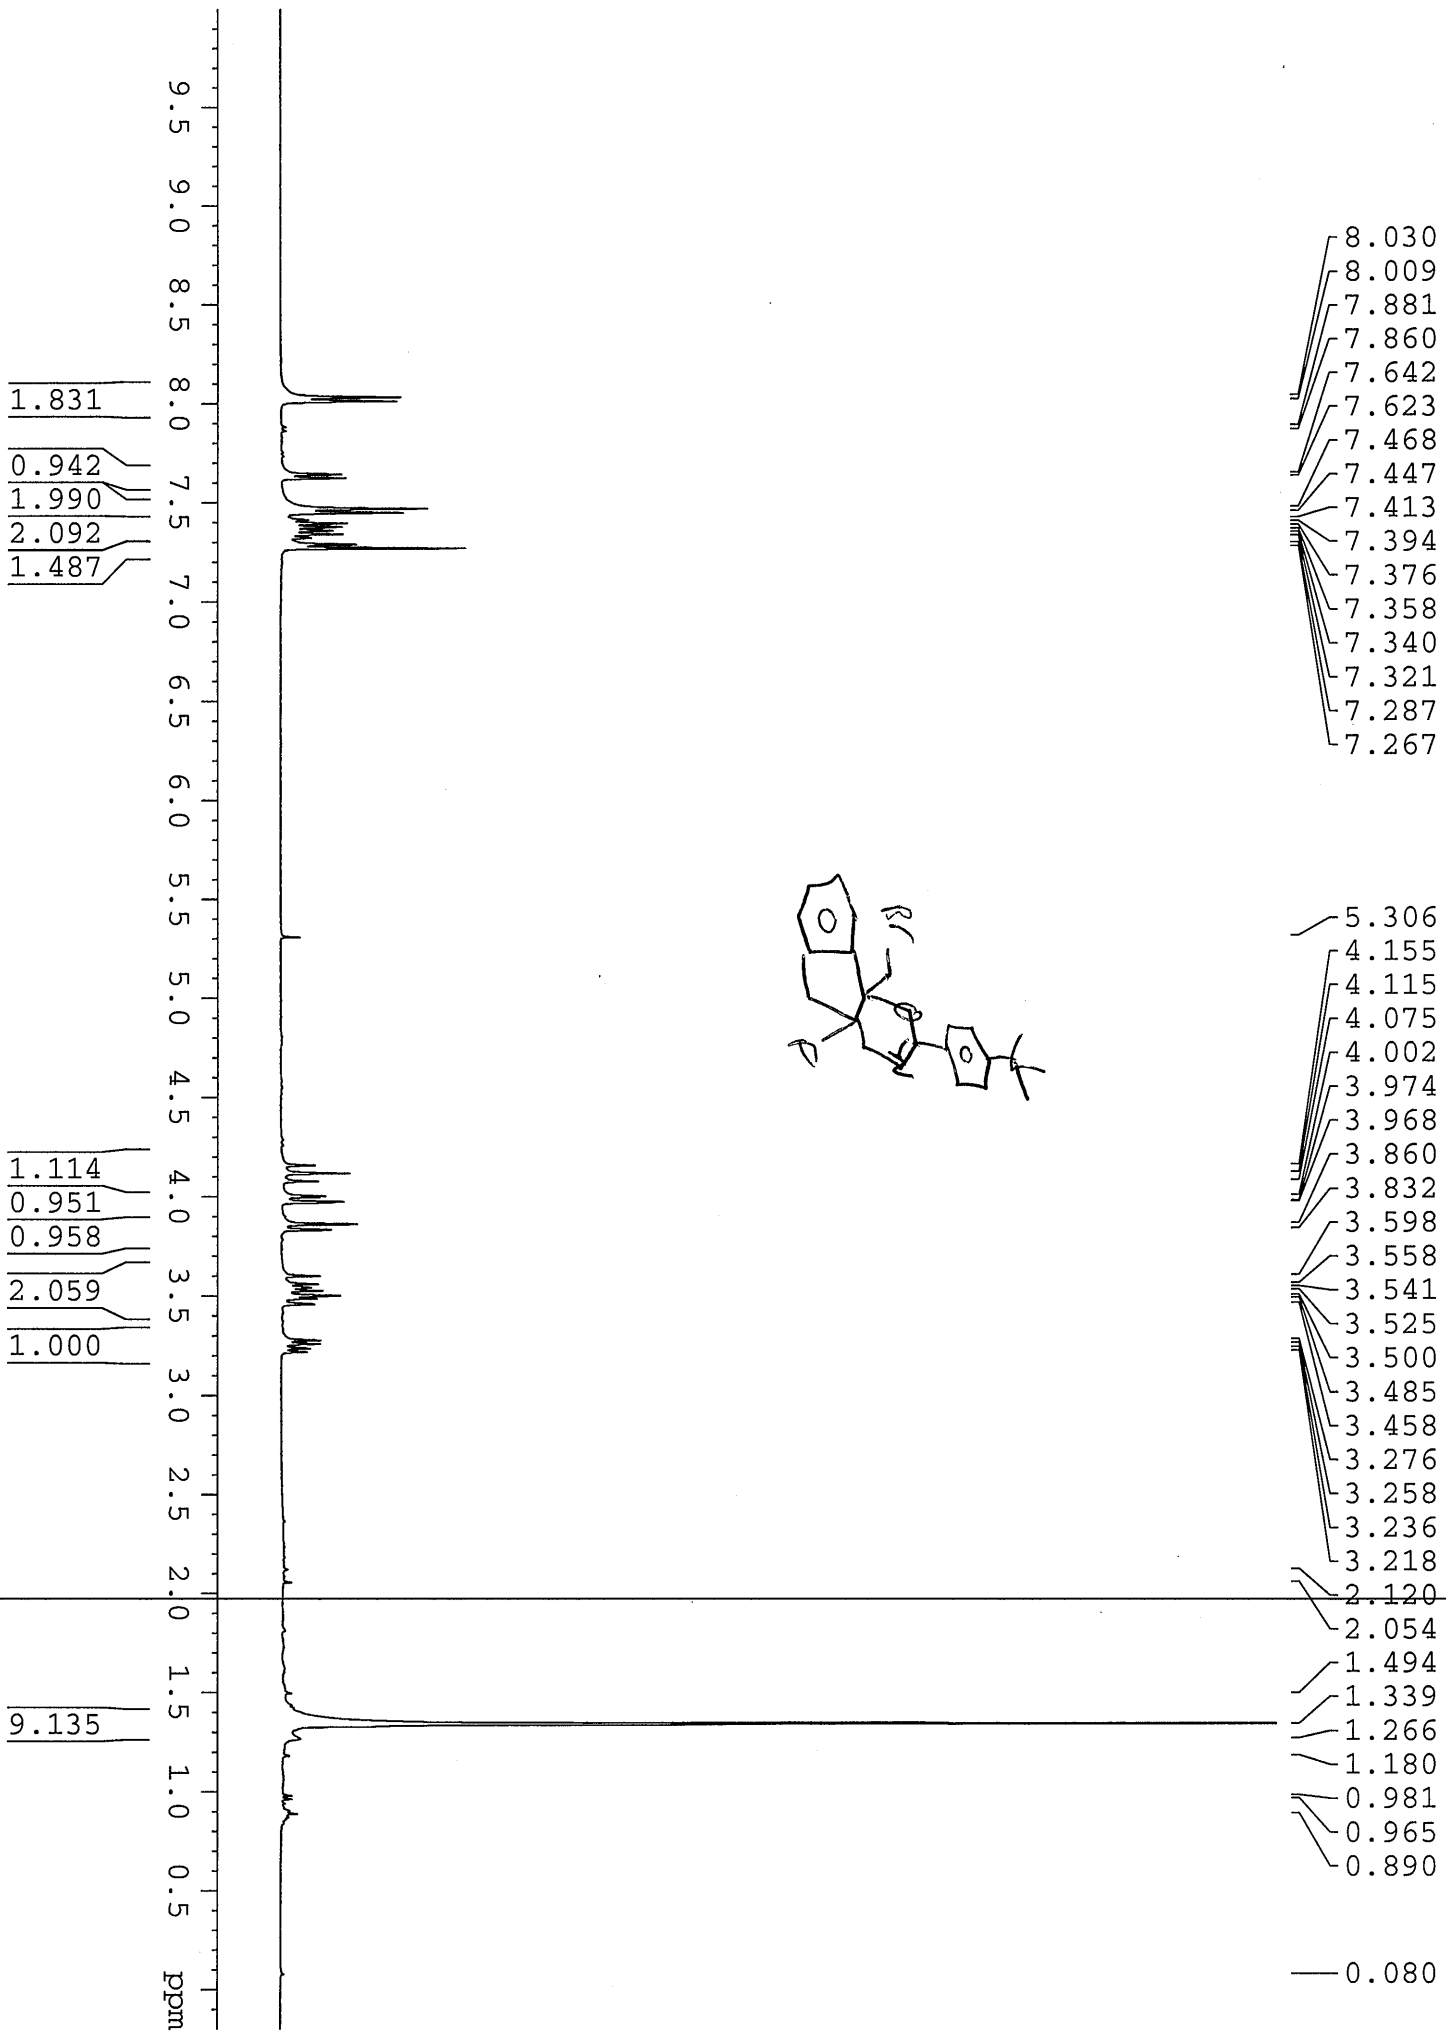



202AC AVQ-400 ONP Carbon Starting Parameters 7/16/03

JW-08-202AC

NAME  
 EXPNO 1  
 PROCNO 1  
 Date\_ 20120706  
 Time 8.17  
 INSTRUM AVQ-400  
 PROBD 5 mm QNP 1H/13  
 PULPROG zgpg30  
 TD 65536  
 SOLVENT CDC13  
 NS 1010  
 DS 0  
 SMH 24038.461 Hz  
 FIDRES 0.366798 Hz  
 AQ 1.3632196 sec  
 RG 16384  
 DW 20.800 usec  
 DE 6.00 usec  
 TE 293.5 K  
 D1 2.00000000 sec  
 D11 0.03000000 sec  
 TD0 19000

==== CHANNEL F1 =====  
 NUC1 13C  
 P1 8.50 usec  
 PL1 -2.00 dB  
 PL1W 47.77286148 W  
 SF01 100.6228298 MHz

==== CHANNEL F2 =====  
 CPDPRG2 waltz16  
 NUC2 1H  
 PCPD2 70.00 usec  
 PL2 0.00 dB  
 PL12 15.00 dB  
 PL13 17.00 dB  
 PL12W 9.54516888 W  
 PL13W 0.30184472 W  
 SF02 400.1316000 MHz  
 SI 32768  
 SF 100.6127755 MHz  
 WDM EM  
 SSB 0  
 LB 1.50 Hz  
 GB 0  
 PC 1.40

- 156.33
- 154.44
- 141.00
- 137.11
- 137.00
- 130.22
- 129.77
- 127.55
- 127.22
- 125.55
- 125.33
- 125.11
- 98.49
- 85.25
- 85.05
- 77.31
- 76.99
- 76.67
- 49.97
- 49.71
- 40.94
- 40.70
- 35.19
- 35.08
- 34.85
- 31.16
- 30.97

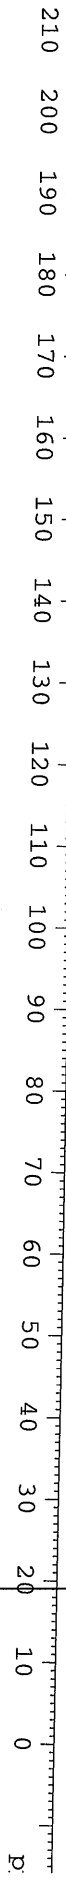

```

NAME          JW-08-202A-D1F
EXPNO         1
PROCNO        1
Date_         20120509
Time          15.27
INSTRUM       AVQ-400
PROBHD        5 mm QNP 1H/13
PULPROG       zgfg1m
TD            131072
SOLVENTF1     CDCl3
NS            32
DS            0
SMH           90090.094 Hz
FIDRES        0.687333 Hz
AQ            0.7275051 sec
RG            3649.1
DW            5.550 usec
DE            6.00 usec
TE            293.0 K
D1            1.00000000 sec
TD0           4

```

```

===== CHANNEL f1 =====
NUC1          19F
P1            16.00 usec
PL1           -3.00 dB
PL1M          20.04748917 W
SFO1          376.467042 MHz
SI            65536
SF            376.4980736 MHz
WDW           EM
SSB           0
LB            0
GB            2.00 Hz
PC            4.00

```

2A AVQ-400 QNP Probe 19F starting parameters. (revised P1, 2/12/04 I  
 chemical shifts relative to CFCl3 at 0 ppm (082103 HvH)  
 sw 239.28 ppm; o1p 0 ppm

168.45  
 168.47  
 168.53

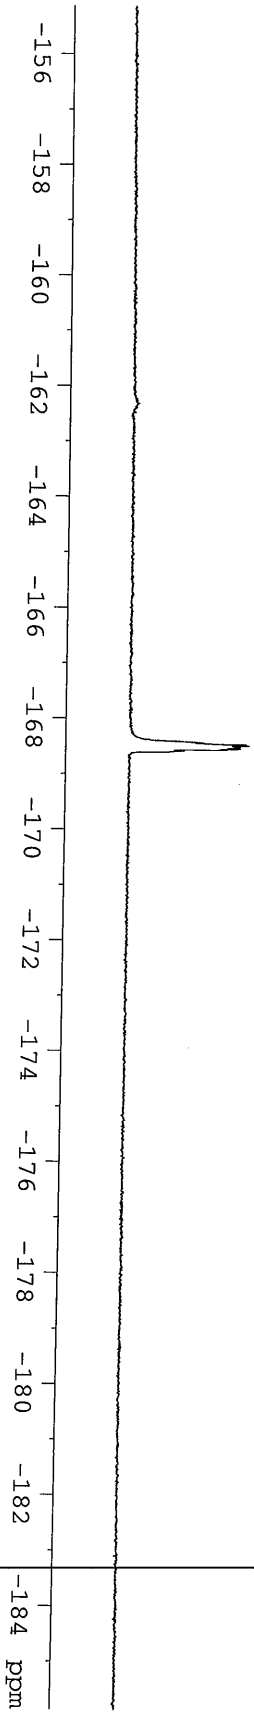

JW-08-207rac- IB9901\_15

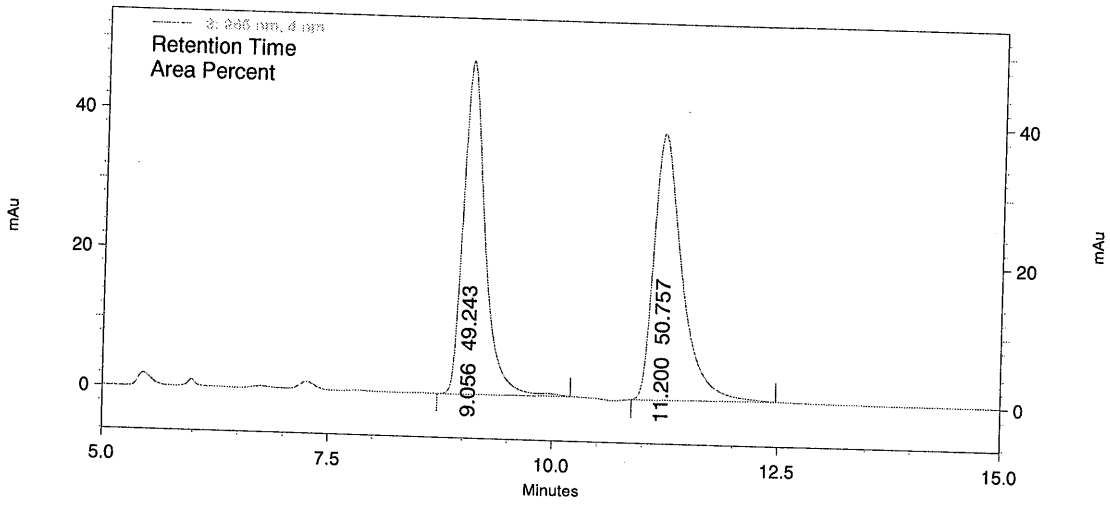

3: 265 nm, 4 nm  
Results

| Pk # | Retention Time | Area Percent | Lambda Max |
|------|----------------|--------------|------------|
| 1    | 9.056          | 49.243       | 203        |
| 2    | 11.200         | 50.757       | 203        |

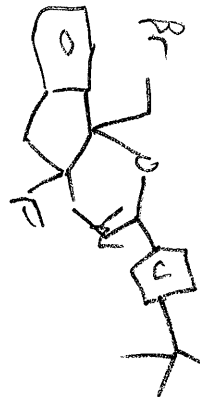

JW-08-202B IB9901

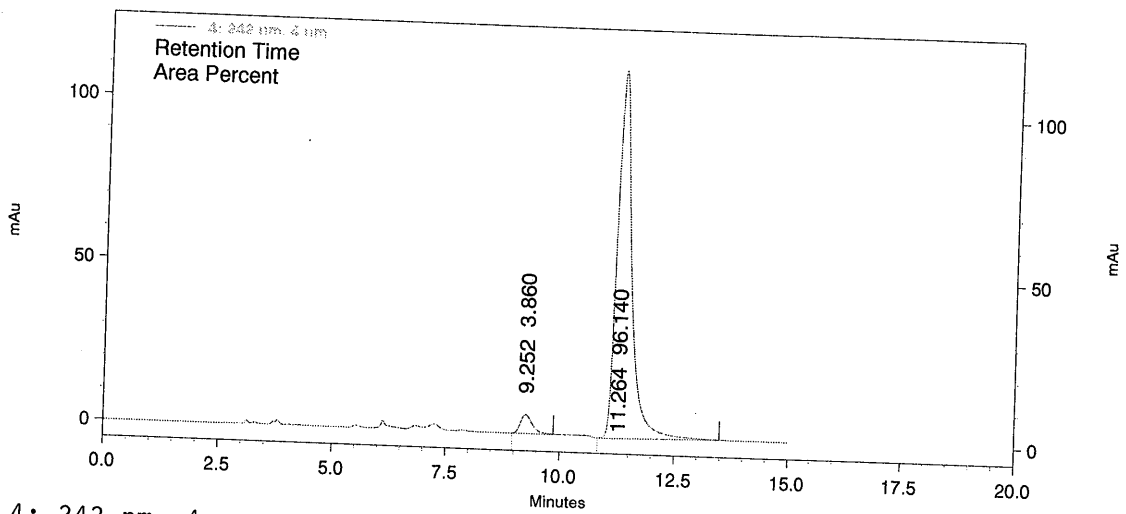

4: 242 nm, 4 nm  
Results

| Pk # | Retention Time | Area Percent | Lambda Max |
|------|----------------|--------------|------------|
| 1    | 9.252          | 3.860        | 209        |
| 2    | 11.264         | 96.140       | 203        |

```

NAME      jeff_pdt
EXPNO     1
PROCNO    1
Date_     20120802
Time      19.01
INSTRUM   AV-600
PROBHD    5 mm PABBO BB-
PULPROG   zg30
TD         65536
SOLVENT   CDCl3
NS         8
DS         1
SMH        12019.230 Hz
FIDRES    0.183399 Hz
AQ         2.7263477 sec
RG         128
DE         41.600 usec
TE         6.00 usec
D1         294.0 K
TD0        0.10000000 sec
===== CHANNEL f1 =====
NUC1       1H
P1         13.75 usec
PL1        -2.00 dB
PL1W       22.93097305 W
SF01       600.1339008 MHz
SI         65536
SF         600.1300184 MHz
WDW        EM
SSB        0
LB         0.30 Hz
GB         0
PC         4.00

```

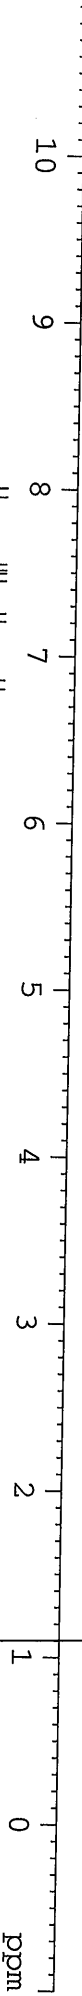

- 7.980
- 7.966
- 7.893
- 7.525
- 7.471
- 7.457
- 7.260
- 7.231
- 7.216
- 6.830
- 6.816
- 4.609
- 4.590
- 4.578
- 4.249
- 4.230
- 4.102
- 4.084
- 3.887
- 3.856
- 3.834
- 3.816
- 3.800
- 3.770
- 3.737
- 3.706
- 1.807
- 1.653
- 1.451
- 1.425
- 1.347
- 1.330
- 1.254
- 1.241
- 0.971
- 0.960

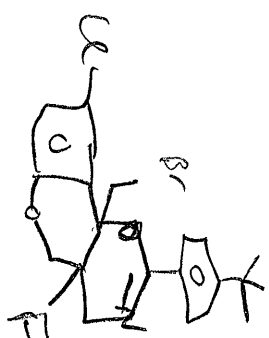

- 1.938
- 0.968
- 2.028
- 0.994
- 1.000
- 1.064
- 1.064
- 1.074
- 3.286
- 10.106

```

NAME Jeff_pdt
EXPNO 13
PROCNO 1
Date_ 20120802
Time 19.04
INSTRUM AV-600
PROBHD 5 mm PABBO BB-
PULPROG zgpg30
TD 131072
SOLVENT CDCl3
NS 800
DS 0
SWH 36057.691 Hz
FIDRES 0.275098 Hz
AQ 1.8175818 sec
RG 2050
DM 13.867 usec
DE 6.00 usec
TE 294.1 K
D1 1.50000000 sec
D11 0.03000000 sec
TD0 1000

```

```

===== CHANNEL f1 =====
NUC1 13C
P1 8.50 usec
P1L 2.00 dB
P1LW 62.60328293 W
SFO1 150.9178993 MHz

```

```

===== CHANNEL f2 =====
CPDPRG2 waltz16
NUC2 1H
PCPD2 70.00 usec
PL2 -2.00 dB
PL12 12.14 dB
PL13 19.00 dB
PL2W 22.93097305 W
PL12W 0.88993933 W
PL13W 0.18214719 W
SFO2 600.1327006 MHz
SI 65536
SF 150.9027880 MHz
WDW EM
SSB 0
LB 0.75 Hz
GB 0
PC 1.50

```

- 154.88
- 152.95
- 150.54
  
- 131.20
- 129.49
- 127.45
- 127.22
- 126.69
- 125.49
- 123.40
- 118.48
  
- 85.82
- 84.58
- 77.37
- 77.16
- 76.95
- 74.58
- 74.44
- 66.57
- 66.35
  
- 48.74
- 48.57
  
- 35.95
- 35.90
- 35.07
- 31.34

210 200 190 180 170 160 150 140 130 120 110 100 90 80 70 60 50 40 30 20 10 0

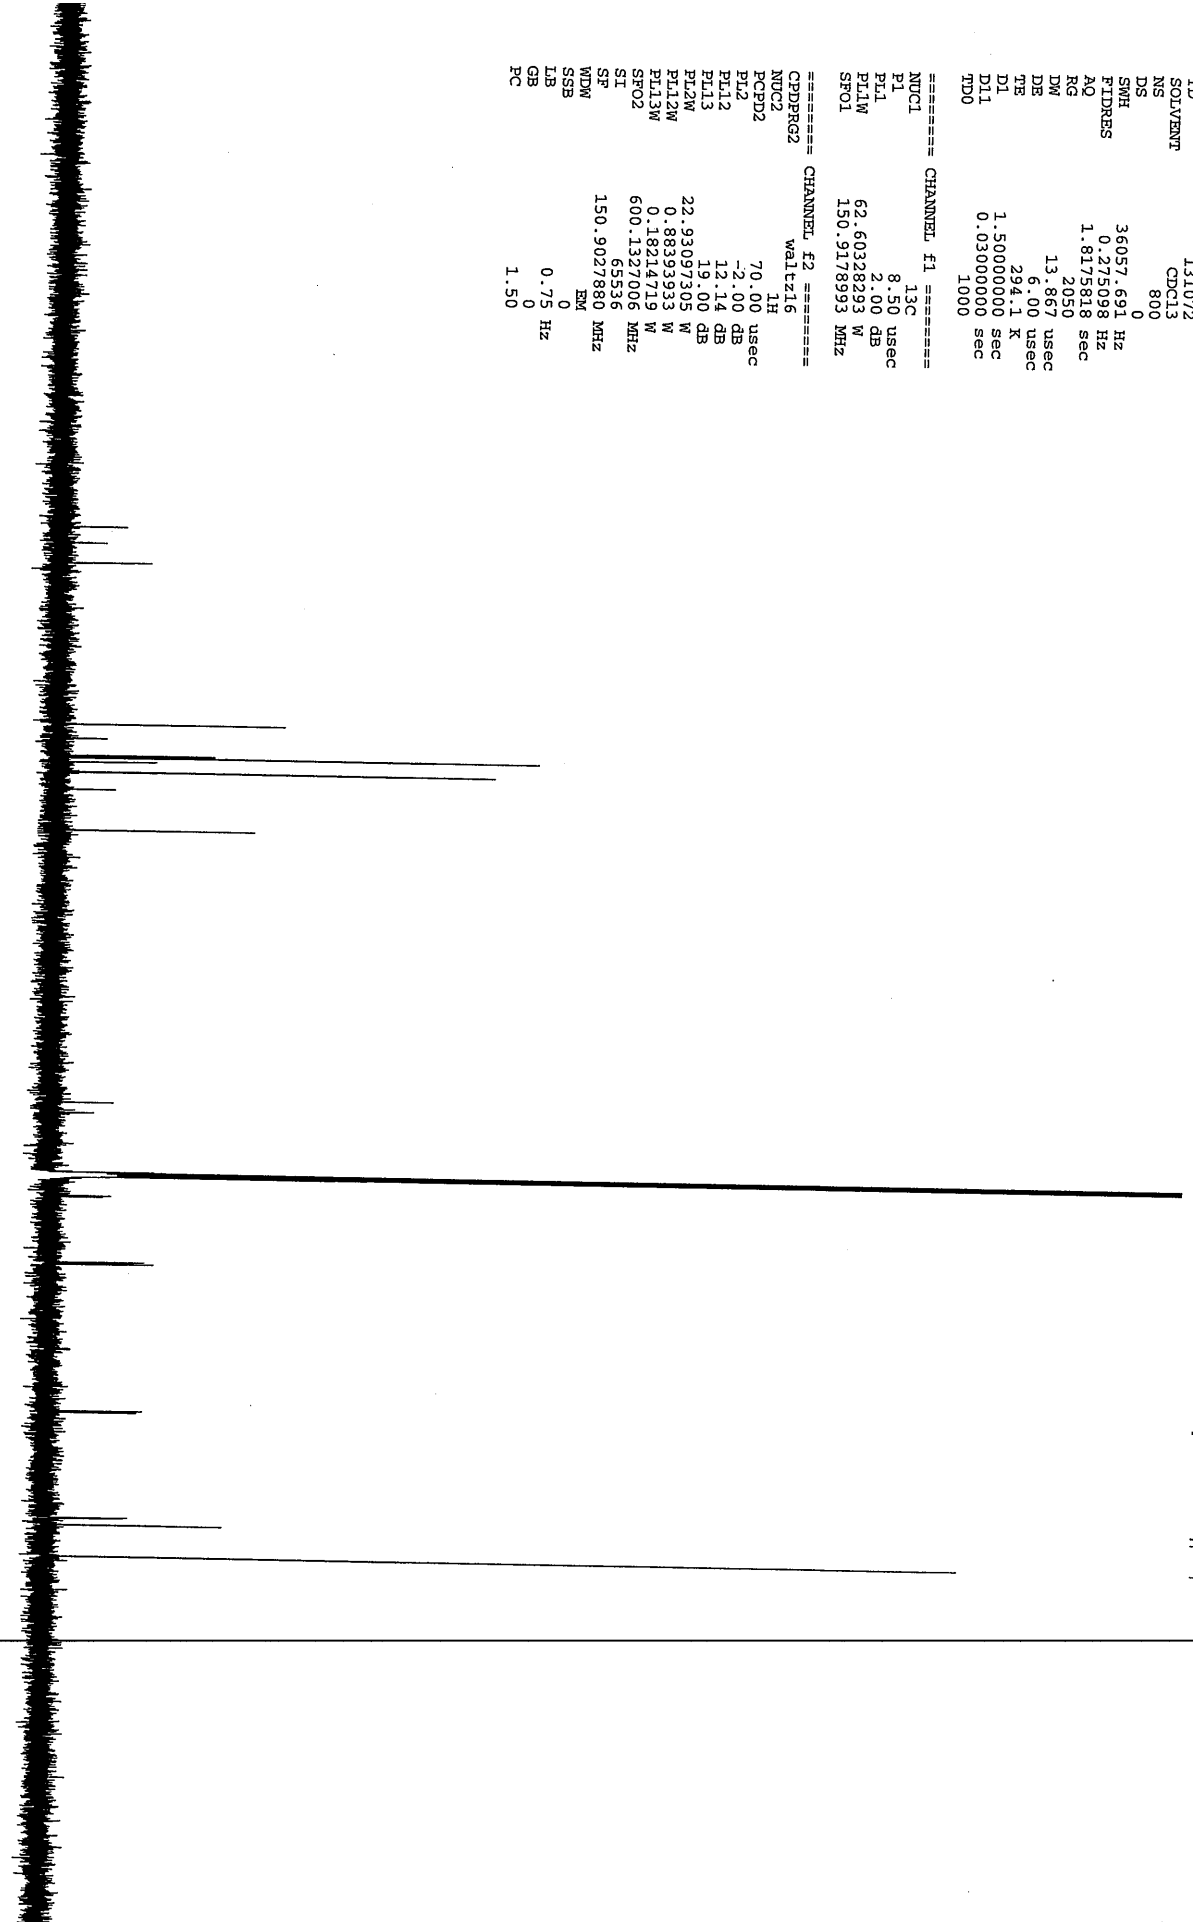

```

NAME          JW-08-194-bottombandf
EXPNO         1
PROCNO        1
Date_         20120430
Time          11.18
INSTRUM       AVQ-400
PROBHD        5 mm QNP 1H/13
PULPROG       zgfg1qn
TD            131072
SOLVENT       CDCl3
NS            32
DS            0
SMF           90090.094 Hz
FIDRES        0.687333 Hz
AQ            0.7275051 sec
RG            3251
DW            5.550 usec
DE            6.00 usec
TE            293.5 K
D1            1.00000000 sec
TD0           4

===== CHANNEL f1 =====
NUC1          19F
P1            16.00 usec
PL1           -3.00 dB
PL1W          20.04748917 W
SFO1          376.4607042 MHz
SI            65536
SF            376.4980736 MHz
WDW           EM
SSB           0
LB            2.00 Hz
GB            0
PC            2.00

```

bottomband AVQ-400 QNP Probe 19F starting parameters. (revised P1, 2  
 chemical shifts relative to CFC13 at 0 ppm (082103 HVH)  
 sw 239.28 ppm; o1p 0 ppm

```

-175.20
-175.25
-175.30
-175.33

```

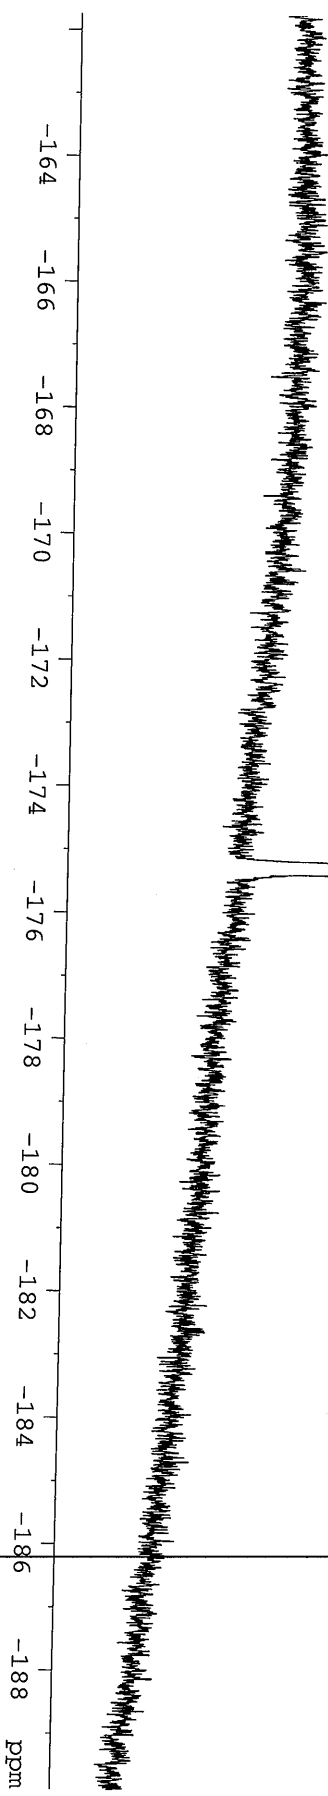

JW-08-194rac IC9802\_30min

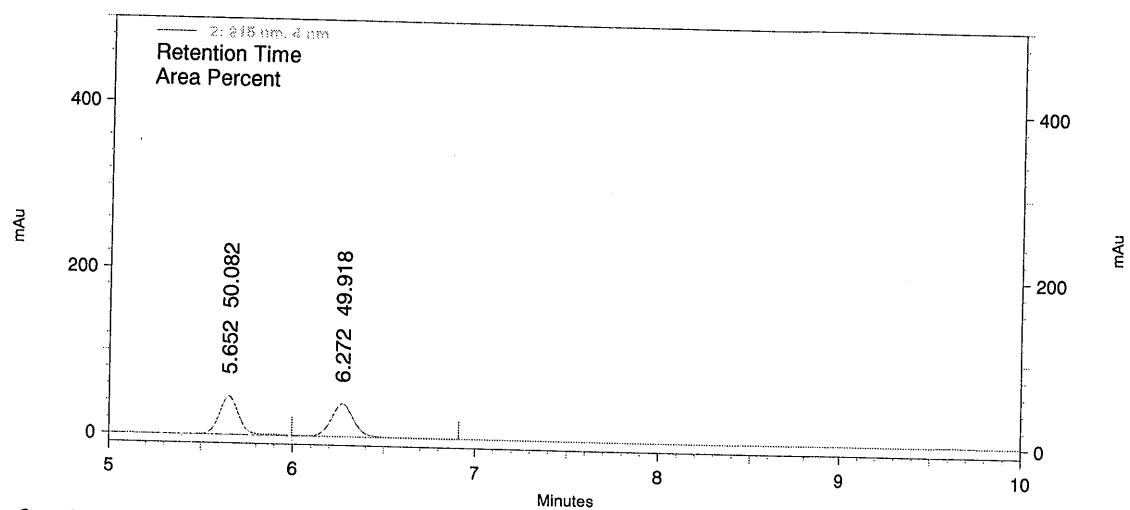

2: 215 nm, 4 nm  
Results

| Pk # | Retention Time | Area Percent | Lambda Max |
|------|----------------|--------------|------------|
| 1    | 5.652          | 50.082       | 204        |
| 2    | 6.272          | 49.918       | 204        |

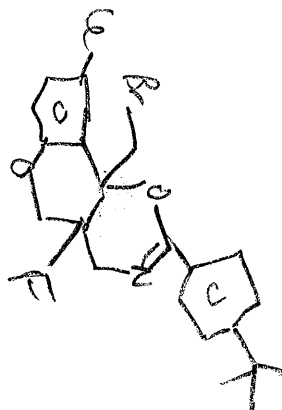



JW-09-6 IC9802\_15min

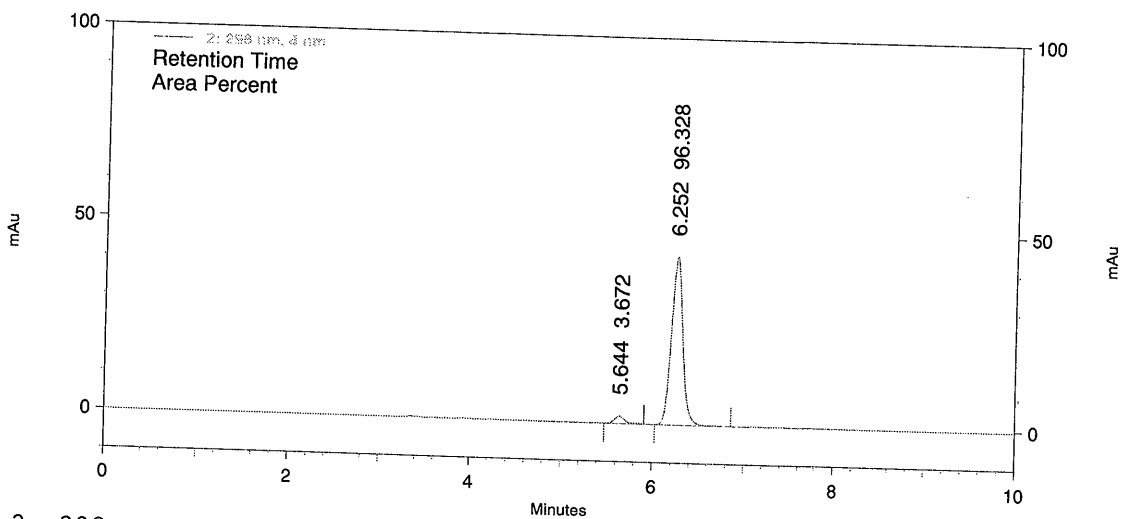

2: 298 nm, 4 nm  
Results

| Pk # | Retention Time | Area Percent | Lambda Max |
|------|----------------|--------------|------------|
| 1    | 5.644          | 3.672        | 204        |
| 2    | 6.252          | 96.328       | 205        |

Current Data Parameters  
 NAME JW-09-103A  
 EXPNO 1  
 PROCNO 1

F2 - Acquisition Parameters

Date\_ 20120830  
 Time 13.39  
 INSTRUM AV-500  
 PROBHD 5 mm TBI 1H/31  
 PULPROG zg30  
 TD 65536  
 SOLVENT CDCl3  
 NS 16  
 DS 0  
 SWH 10330.578 Hz  
 FIDRES 0.157632 Hz  
 AQ 3.171923 sec  
 RG 256  
 DW 48.400 usec  
 DE 6.00 usec  
 TE 293.8 K  
 D1 0.10000000 sec  
 TD0 2

===== CHANNEL F1 =====  
 NUCL1 1H  
 P1 7.60 usec  
 PL1 0 dB  
 PL1W 12.55943203 W  
 SFO1 500.2330889 MHz

F2 - Processing parameters  
 SI 65536  
 SF 500.2300165 MHz  
 WDW EM  
 SSB 0  
 LB 0.30 Hz  
 GB 0  
 PC 8.00

- 7.278
- 7.152
- 7.138
- 7.123
- 7.015
- 7.000
- 6.927
- 6.908
- 6.893
- 6.878
- 6.837
- 6.821
- 6.756
- 6.740
- 5.396
- 5.366
- 5.354
- 5.351
- 5.337
- 5.155
- 5.021
- 3.395
- 3.381
- 3.282
- 3.267
- 2.082
- 1.810
- 1.802
- 1.767
- 1.738
- 1.660
- 1.478
- 1.393
- 1.290

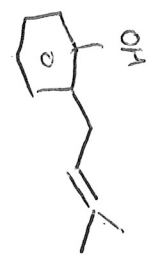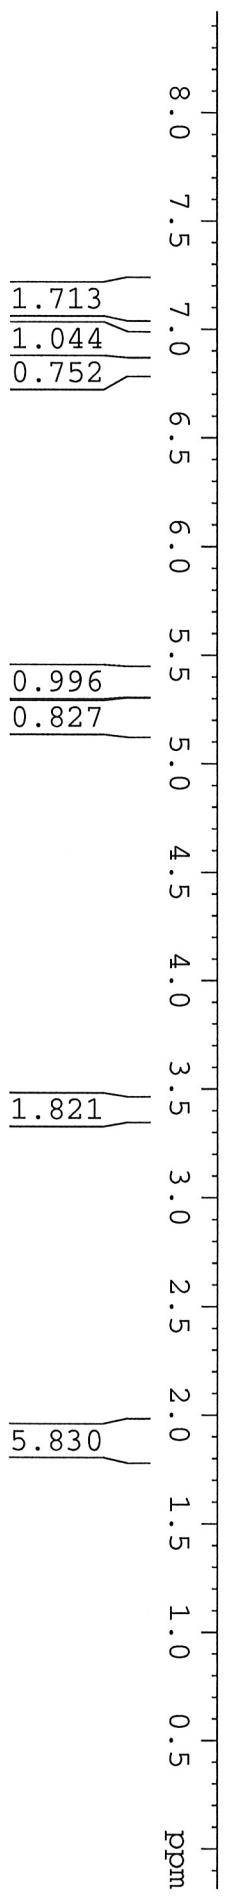

103A AVB-400 ZBO Carbon Starting paramters 6/11/03 RN

Current Data Parameters  
 NAME JW-09-103ACarb  
 EXPNO 1  
 PROCNO 1

F2 - Acquisition Parameters  
 Date\_ 20121004  
 Time 17.00  
 INSTRUM AVB-400  
 PROBHD 5 mm PABBO BB-  
 PULPROG zgpg30  
 TD 65536  
 SOLVENT CDCl3  
 NS 34  
 DS 0  
 SMH 23980.814 Hz  
 FIDRES 0.365918 Hz  
 AQ 1.3664756 sec  
 RG 16384  
 DM 20.850 usec  
 DE 6.00 usec  
 TE 297.0 K  
 D1 1.5000000 sec  
 D11 0.0300000 sec  
 TD0 1000

==== CHANNEL f1 =====  
 NUCL1 13C  
 P1 8.50 usec  
 PL1 -2.00 dB  
 PL1W 47.77286148 W  
 SFO1 100.6228298 MHz

==== CHANNEL f2 =====  
 CPDPRG2 waltz16  
 NUCL2 1H  
 PCPD2 70.00 usec  
 PL2 -3.00 dB  
 PL12 16.00 dB  
 PL13 16.00 dB  
 PL2W 23.05461311 W  
 PL12W 0.29024038 W  
 PL13W 0.29024038 W  
 SFO2 400.1316005 MHz

F2 - Processing parameters  
 SI 32768  
 SF 100.6127690 MHz  
 WDW EM  
 SSB 0  
 LB 1.50 Hz  
 GB 0  
 PC 6.00

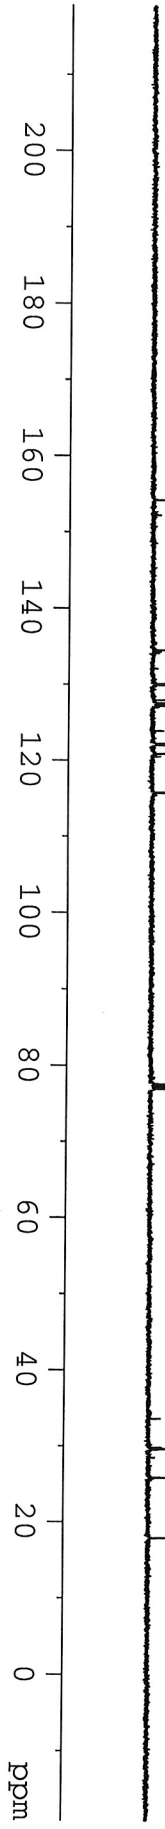

- 154.228
- 134.538
- 130.069
- 127.555
- 127.260
- 122.069
- 120.925
- 115.780
- 77.571
- 77.252
- 76.934
- 29.637
- 25.884
- 17.937

```

NAME          JW-09-strip-RF
EXPNO         1
PROCNO        1
Date_         20120830
Time          14.53
INSTRUM       AVO-400
PROBHD        5 mm QNP 1H/13
PULPROG       zg30
TD            65536
SOLVENT       CDCl3
NS            16
DS            0
SWH           8012.820 Hz
FIDRES        0.122266 Hz
AQ            4.0895586 sec
RG            16
DE            62.400 usec
TE            293.5 K
D1            1.0000000 sec
TD0           4

===== CHANNEL f1 =====
NUC1          1H
P1            12.80 usec
PL1           0.00 dB
PL1W          9.54516888 W
SFO1          400.1324700 MHz
SI            65536
SF            400.1300142 MHz
WDW           EM
SSB           0
LB            0.30 Hz
GB            0
PC            4.00

```

- 7.267
- 7.173
- 7.152
- 7.132
- 6.914
- 6.896
- 6.877
- 6.843
- 6.824
- 6.763
  
- 5.332
- 5.311
- 5.200
- 5.082
- 5.013
- 4.959
  
- 3.269
- 3.088
- 3.070
- 3.038
- 3.017
- 2.999
- 2.989
- 2.962
  
- 2.191
- 1.834
- 1.748
- 1.716
- 1.642
- 1.373
- 1.265
  
- 0.080

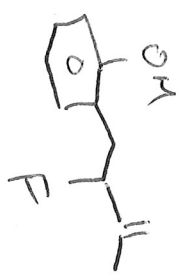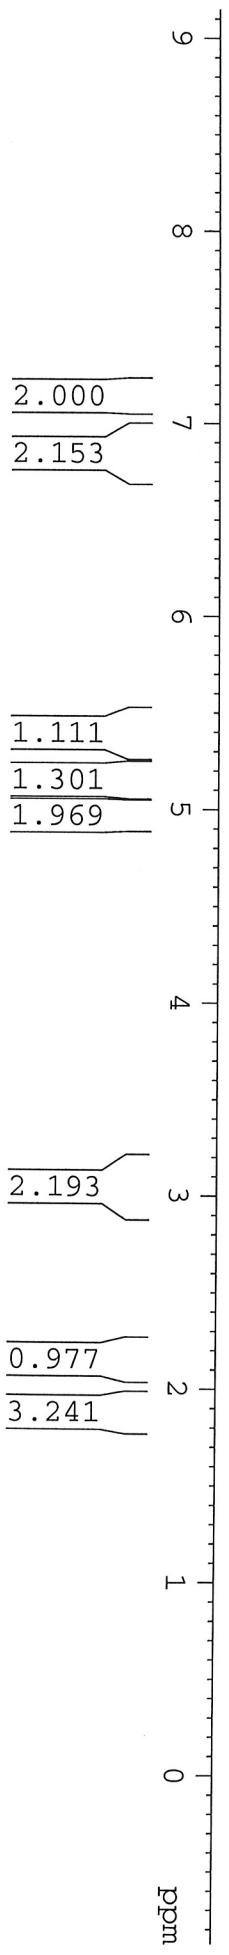

JW-09-dimethyl1ProdP1C

```

NAME
EXPNO 1
PROCNO 1
Date_ 20121027
Time 15.59
INSTRUM AVO-400
PROBHD 5 mm QNP 1H/13
PULPROG zgpg30
TD 65536
SOLVENT CDCl3
NS 268
DS 0
SWH 24038.461 Hz
FIDRES 0.366798 Hz
AQ 1.3632196 sec
RG 16384
DW 20.800 usec
DE 6.00 usec
TE 292.9 K
D1 2.00000000 sec
D11 0.03000000 sec
TD0 10000

```

```

===== CHANNEL F1 =====
NUC1 13C
PI 8.50 usec
PL1 -2.00 dB
PL1W 47.77286148 W
SFO1 100.6228298 MHz

```

```

===== CHANNEL F2 =====
CPDPRG2 waltz16
NUC2 1H
PCPD2 70.00 usec
PL2 0.00 dB
PL12 15.00 dB
PL13 17.00 dB
PL2W 9.54516888 W
PL12W 0.30184472 W
PL13W 0.19045115 W
SFO2 400.1316000 MHz
SI 32768
SF 100.6127755 MHz
WDW EM
SSB 0
LB 1.50 Hz
GB 0
PC 2.00

```

- 154.07
- 142.83
- 142.66
- 131.49
- 128.28
- 123.55
- 120.89
- 115.97
- 113.12
- 113.02
- 97.49
- 95.80
- 77.31
- 76.99
- 76.67
- 35.63
- 35.40
- 17.51
- 17.48

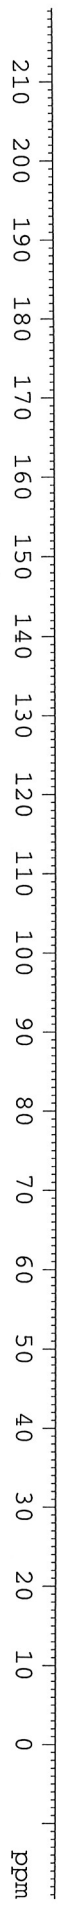

AVQ-400 QNP Probe 19F starting parameters. (revised P1, 2/12/04 RN)  
 chemical shifts relative to CFC13 at 0 ppm (082103 HVH)  
 sw 239.28 ppm; o1p 0 ppm

20.28  
 173.33  
 173.41  
 173.47

```

NAME          JW-09-strip-RP-F-100
EXPNO         1
PROCNO        1
Date_         20120830
Time_         14.57
INSTRUM       AVO-400
PROBHD        5 mm QNP 1H/13
PULPROG       zgfg1gm
TD            131072
SOLVENT       CDCl3
NS            16
DS            0
SWH           90090.094 Hz
FIDRES       0.687333 Hz
AQ           0.7275051 sec
RG           3642.1
DW           5.550 usec
DE           6.00 usec
TE           293.4 K
D1           1.00000000 sec
TD0          2

===== CHANNEL f1 =====
NUC1          19F
P1           16.00 usec
PL1          -3.00 dB
PL1W         20.04748917 W
SFO1         376.4607042 MHz
SI           65536
SF           376.4980736 MHz
WDW          EM
SSB          0
LB           2.00 Hz
GB           0
PC           4.00
  
```

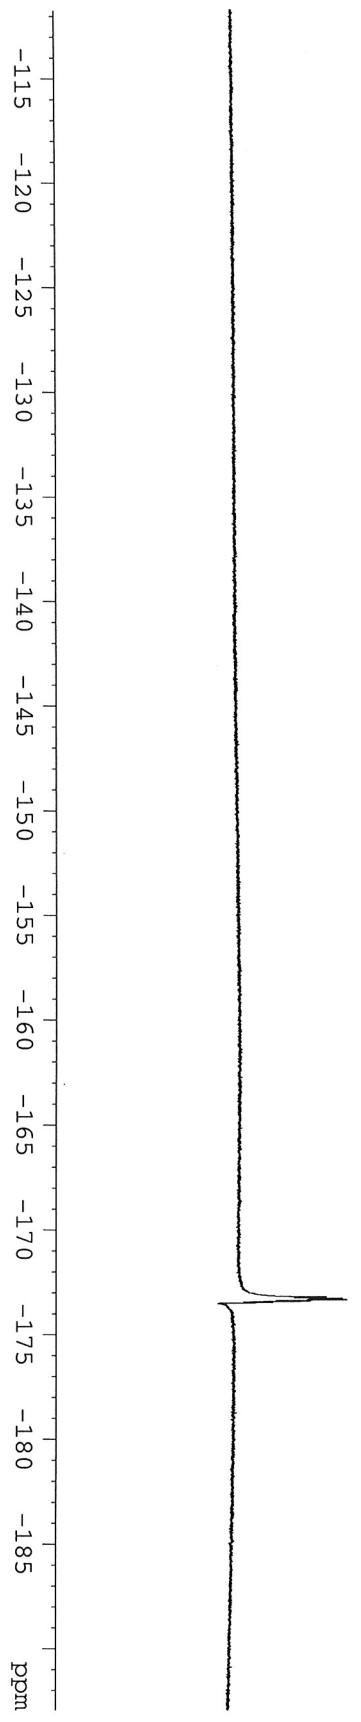

JW-09-102rac ic9901-45

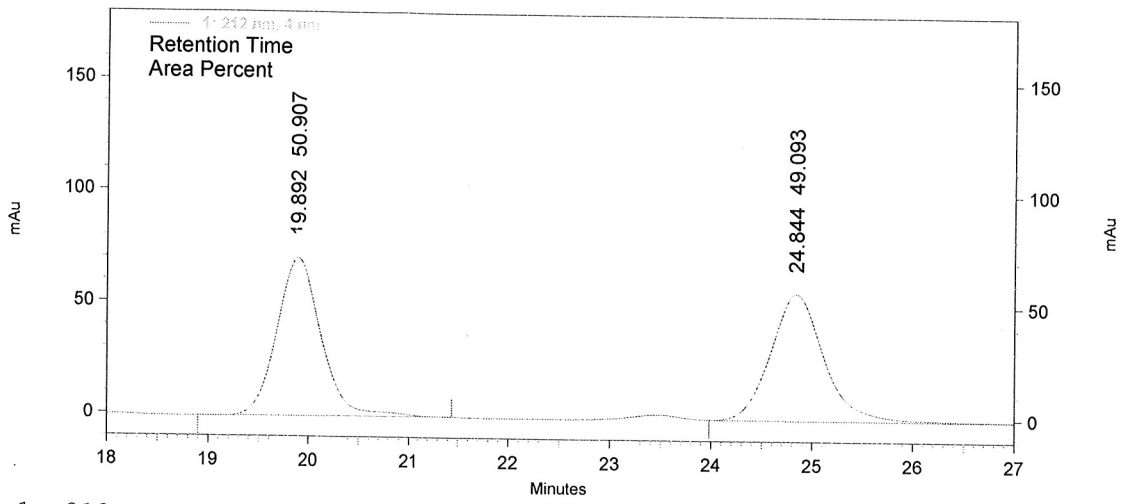

1: 212 nm, 4 nm  
Results

| Pk # | Retention Time | Area Percent | Lambda Max |
|------|----------------|--------------|------------|
| 1    | 19.892         | 50.907       | 200        |
| 2    | 24.844         | 49.093       | 200        |

JW-09-102strip ic9901-45

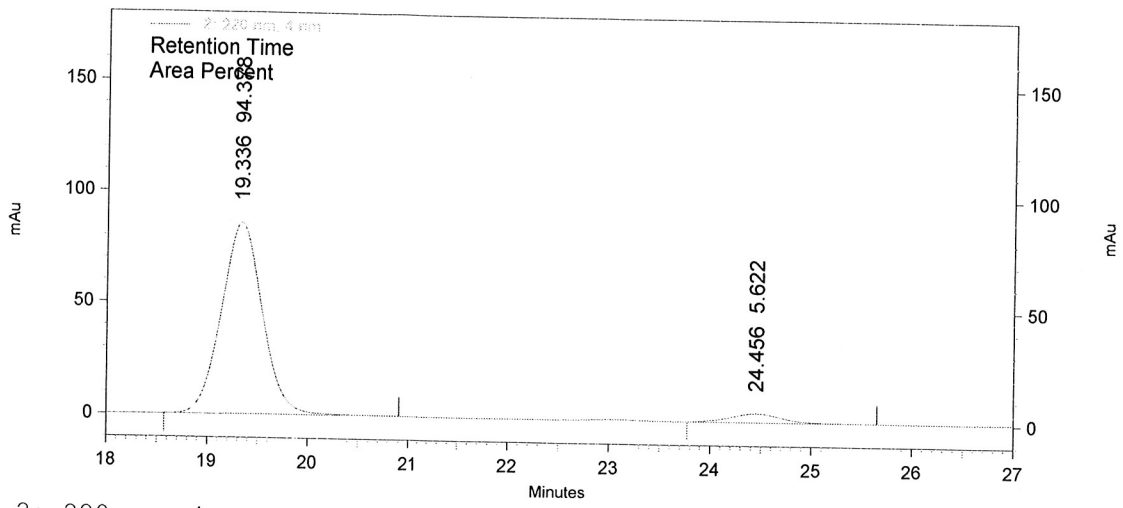

2: 220 nm, 4 nm  
Results

| Pk # | Retention Time | Area Percent | Lambda Max |
|------|----------------|--------------|------------|
| 1    | 19.336         | 94.378       | 200        |
| 2    | 24.456         | 5.622        | 217        |



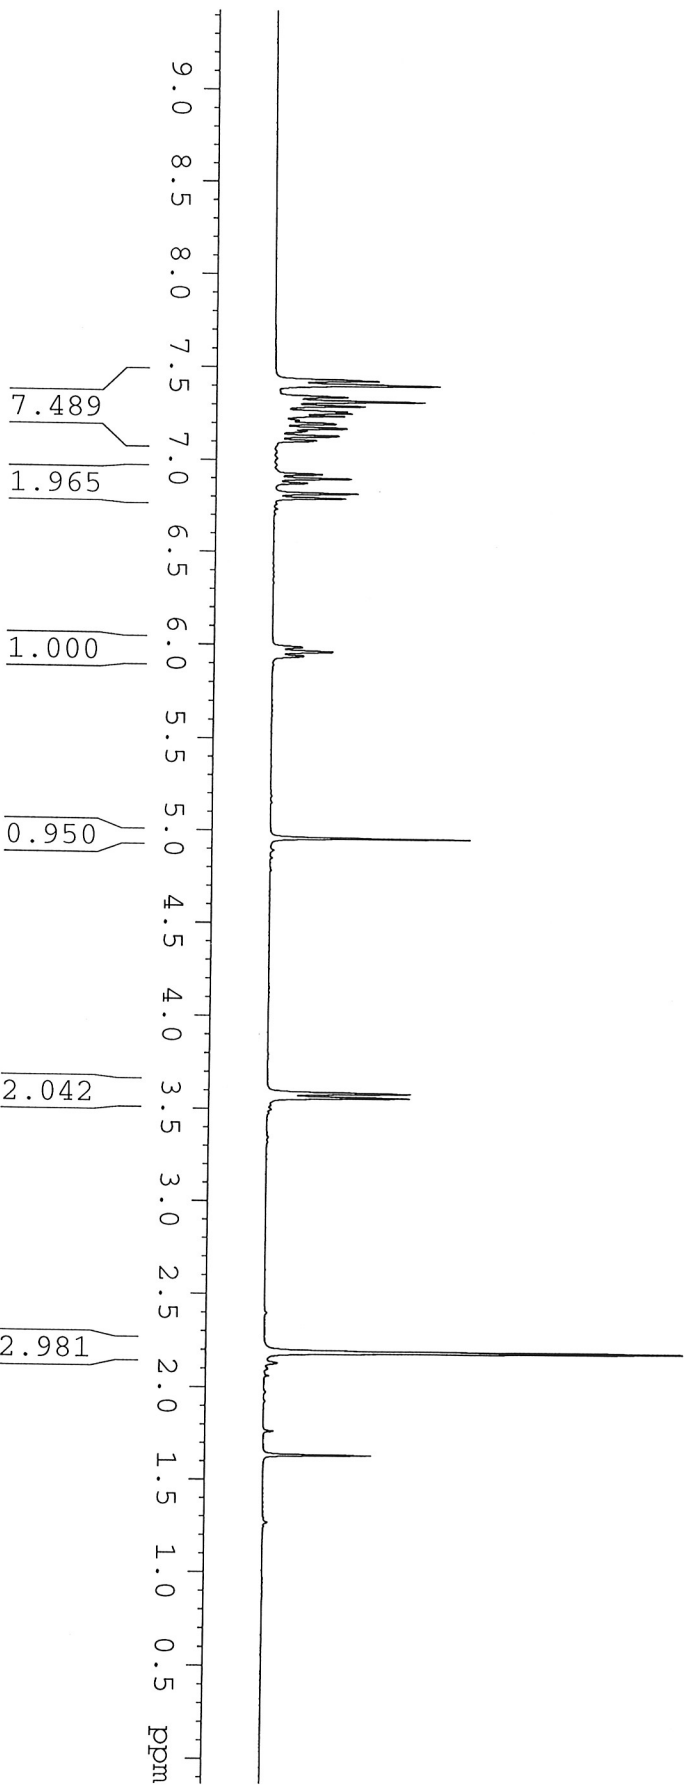

- 7.427
- 7.403
- 7.340
- 7.316
- 7.291
- 7.261
- 7.252
- 7.237
- 7.213
- 7.195
- 7.170
- 7.156
- 7.130
- 7.104
- 7.006
- 6.971
- 6.920
- 6.896
- 6.871
- 6.816
- 6.790
- 6.731
- 6.704
- 5.983
- 5.962
- 5.937
- 4.955
- 4.891
- 4.848
- 4.781
- 3.586
- 3.562
- 3.498
- 3.348
- 2.398
- 2.188
- 2.130
- 2.101
- 2.062
- 1.977
- 1.764
- 1.634
- 1.268

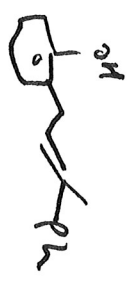

AVB-400 ZBO Carbon Starting parameters 6/11/03 RN

Current Data Parameters  
 NAME JW-09-114  
 EXPNO 1  
 PROCNO 1

F2 - Acquisition Parameters  
 Date\_ 20121004  
 Time 17.05

INSTRUM AVB-400  
 PROBHD 5 mm PABBO BB-  
 PULPROG zgpg30  
 TD 65536  
 SOLVENT CDCl3  
 NS 73  
 DS 0  
 SMH 23980.814 Hz  
 FIDRES 0.365918 Hz  
 AQ 1.3664756 sec  
 RG 16384  
 DW 20.850 usec  
 DE 6.00 usec  
 TE 297.1 K  
 D1 1.5000000 sec  
 D11 0.0300000 sec  
 TD0 1000

==== CHANNEL f1 =====  
 NUC1 13C  
 P1 8.50 usec  
 PL1 -2.00 dB  
 PL1W 47.77286148 W  
 SFO1 100.6228298 MHz

==== CHANNEL f2 =====  
 CPDPRG2 waltz16  
 NUC2 1H  
 P2 70.00 usec  
 PL2 -3.00 dB  
 PL12 16.00 dB  
 PL13 16.00 dB  
 PL2W 23.05461311 W  
 PL12W 0.29024038 W  
 PL13W 0.29024038 W  
 SFO2 400.1316005 MHz

F2 - Processing parameters  
 SI 32768  
 SF 100.6127690 MHz  
 WDW EM  
 SSB 0  
 LB 1.50 Hz  
 GB 0  
 PC 1.40

- 153.963
- 143.414
- 136.928
- 130.106
- 128.309
- 127.628
- 126.995
- 126.800
- 125.827
- 125.523
- 121.005
- 115.636
  
- 77.444
- 77.127
- 76.809
  
- 29.895
  
- 16.071

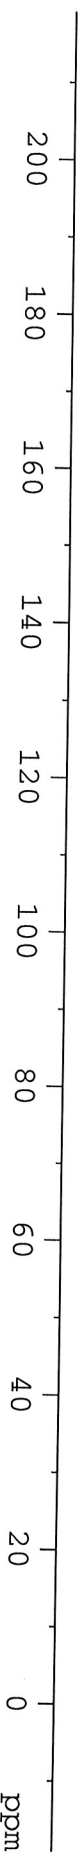

NAME JW-09-115b  
 EXPNO 1  
 PROCNO 1  
 Date\_ 20120909  
 Time 9.56  
 INSTRUM AVO-400  
 PROBRD 5 mm QNP 1H/13  
 PULPROG zgpg30  
 TD 65536  
 SOLVENT CDCl3  
 NS 8  
 DS 0  
 SWH 8012.820 Hz  
 FIDRES 0.122266 Hz  
 AQ 4.0895586 sec  
 RG 256  
 DW 62.400 usec  
 DE 6.00 usec  
 TE 292.9 K  
 D1 1.00000000 sec  
 TD0 2

===== CHANNEL f1 =====  
 NUCL1 1H  
 P1 12.80 usec  
 PL 0.00 dB  
 PL1W 9.54516888 W  
 SFO1 400.1324700 MHz  
 SI 65536  
 SF 400.1300142 MHz  
 WDW EM  
 SSB 0  
 LB 0.30 Hz  
 GB 0  
 PC 16.00

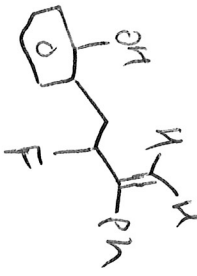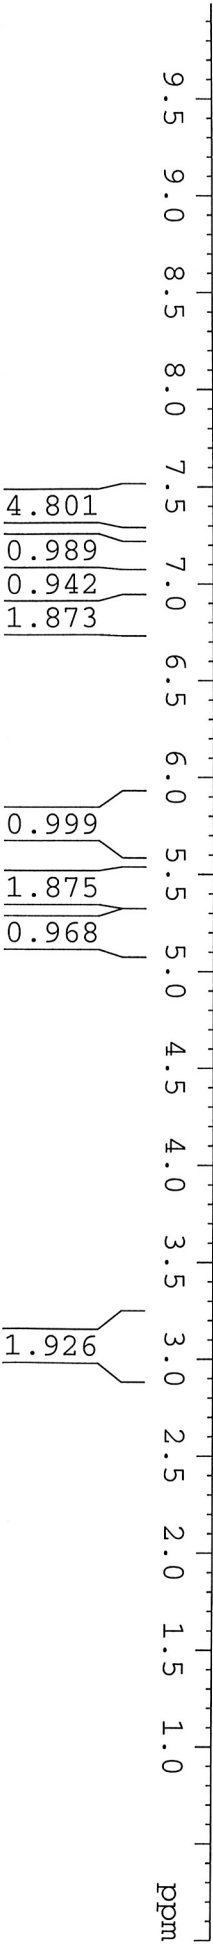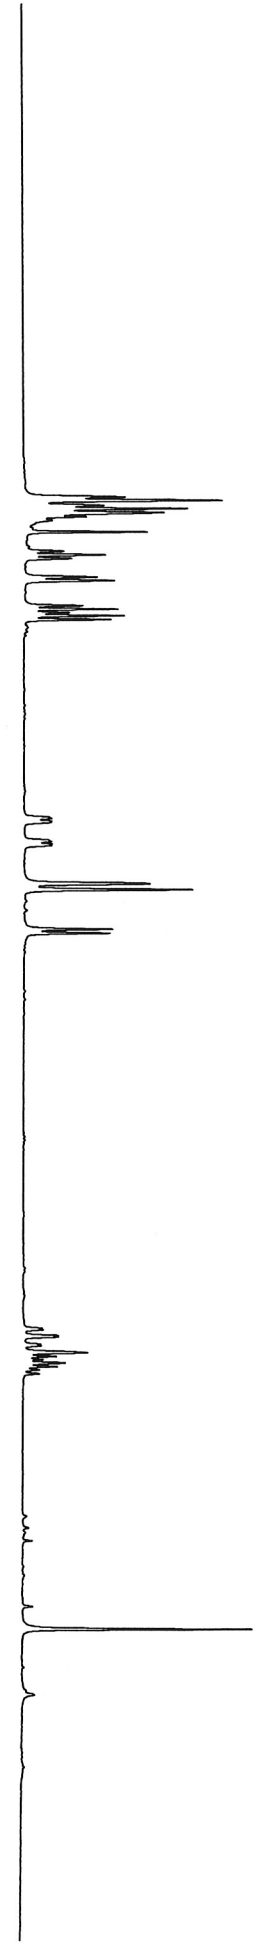

55b rep AVQ-400 QNP Carbon Starting parameters 7/16/03 revised 7/2

```

NAME          JW-09-115bRepF1Carb
EXPNO         1
PROCNO        1
Date_         20121027
Time_         16:18
INSTRUM       AVQ-400
PROBHD        5 mm QNP 1H/13
PULPROG       zgpg30
TD            65536
SOLVENT       CDCl3
NS            458
DS            0
SWH           24038.461 Hz
FIDRES       0.366798 Hz
AQ           1.3632196 sec
RG           16384
DM           20.800 usec
DE           6.00 usec
TE           293.2 K
D1           2.00000000 sec
D11          0.03000000 sec
TD0          1000

===== CHANNEL f1 =====
NUC1          13C
P1            8.50 usec
PL1          -2.00 dB
PL1W         47.77286148 W
SFO1         100.6228298 MHz

===== CHANNEL f2 =====
CPDPRG2      waltz16
NUC2          1H
PCPD2        70.00 usec
PL2           0.00 dB
PL12         15.00 dB
PL13         17.00 dB
PL2W         9.54516888 W
PL12W        0.30184472 W
PL13W        0.19045115 W
SFO2         400.1316000 MHz
SI           32768
SF           100.6127755 MHz
WDW          EM
SSB          0
LB           1.50 Hz
GB           0
PC           2.00
  
```

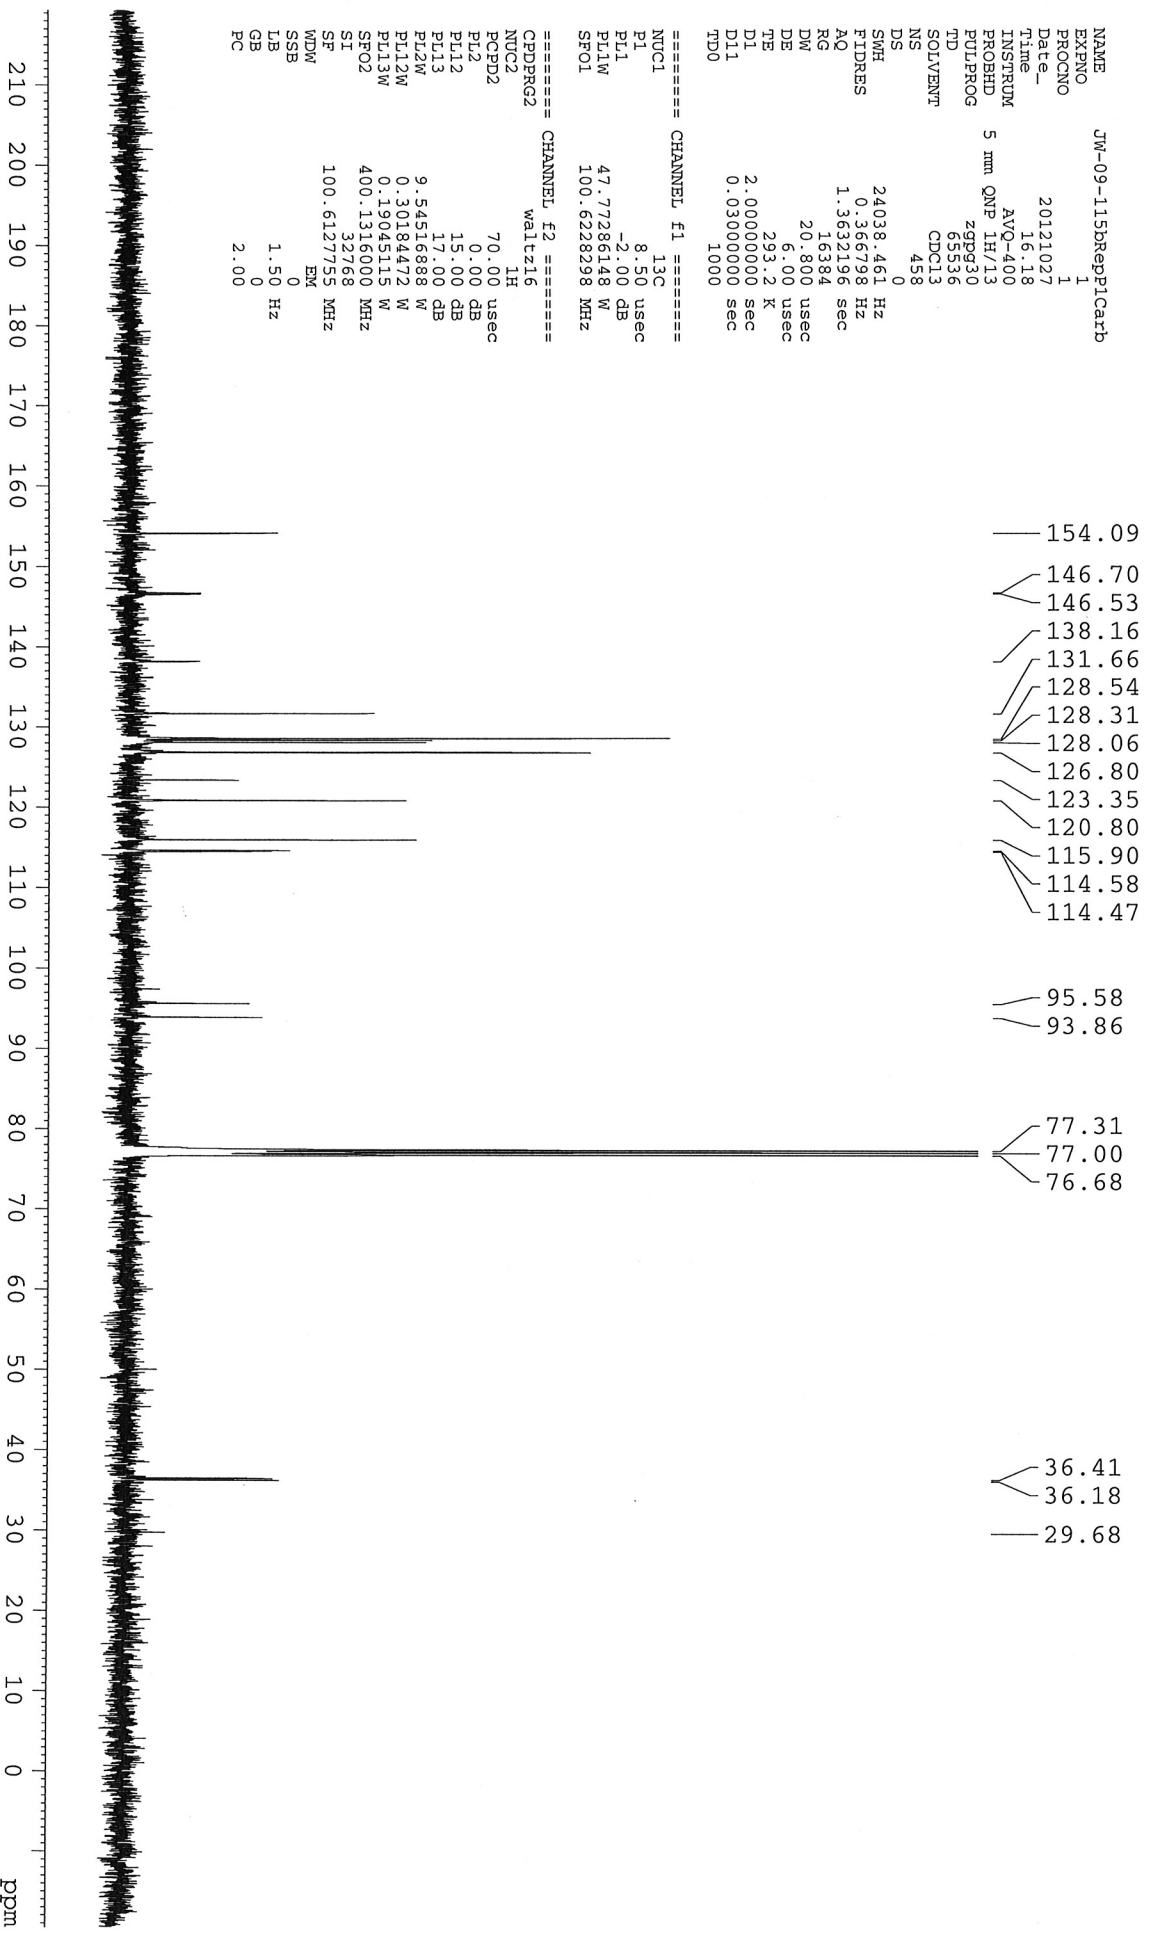

AVQ-400 QNP Probe 19F starting parameters. (revised P  
 NAME cal shift=15.15  
 CHANNEL shift=15.15  
 EXPTNO 1  
 PROCN0 1  
 Date\_ 20120909  
 Time 9.58  
 INSTRUM AVQ-400  
 PROBHD 5 mm QNP 1H/13  
 PULPROG zgfgm  
 TD 131072  
 SOLVENT CDCl3  
 NS 24  
 DS 0  
 SWH 90090.094 Hz  
 FIDRES 0.687333 Hz  
 AQ 0.7275051 sec  
 RG 4096  
 DW 5.550 usec  
 DE 6.00 usec  
 TE 292.9 K  
 D1 1.00000000 sec  
 TD0 3

==== CHANNEL f1 =====  
 NUCL 19F  
 P1 16.00 usec  
 PL1 -3.00 dB  
 PL1W 20.04748917 W  
 SFO1 376.4607042 MHz  
 SI 65536  
 SF 376.4980736 MHz  
 WDW EM  
 SSB 0  
 LB 2.00 Hz  
 GB 0  
 PC 4.00

- 173.87
- 173.89
- 173.93
- 173.95
- 174.02
- 174.08
- 174.10
- 174.14
- 174.19

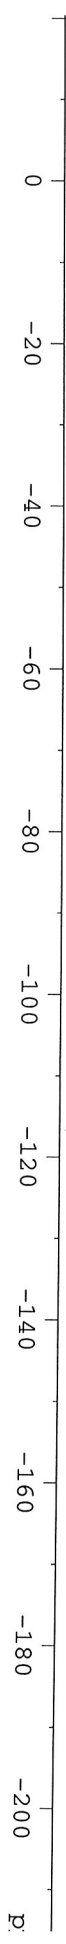

JW-09-115rac- IC9406

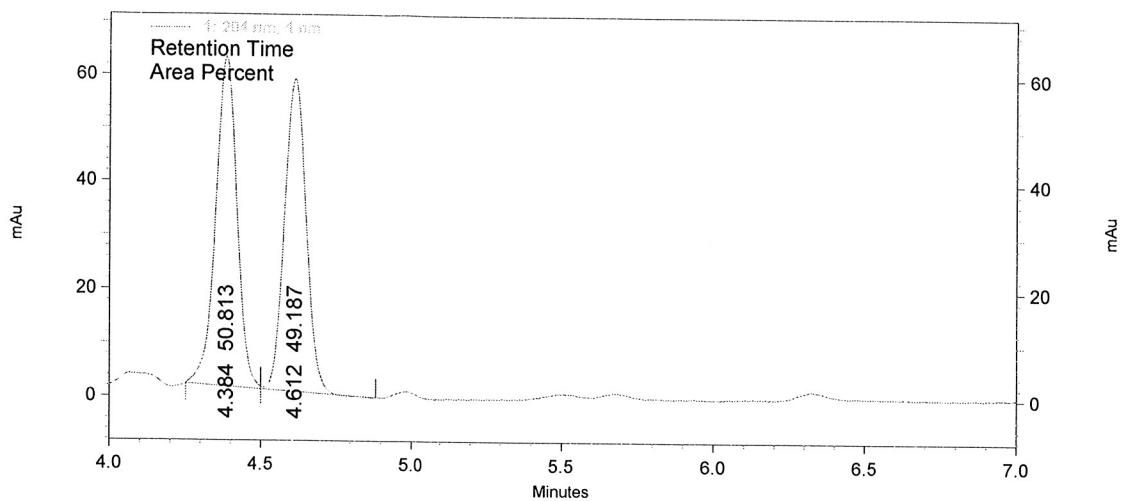

1: 204 nm, 4 nm

Results

| Pk # | Retention Time | Area Percent | Lambda Max |
|------|----------------|--------------|------------|
| 1    | 4.384          | 50.813       | 205        |
| 2    | 4.612          | 49.187       | 205        |

JW-09-115B- IC9406

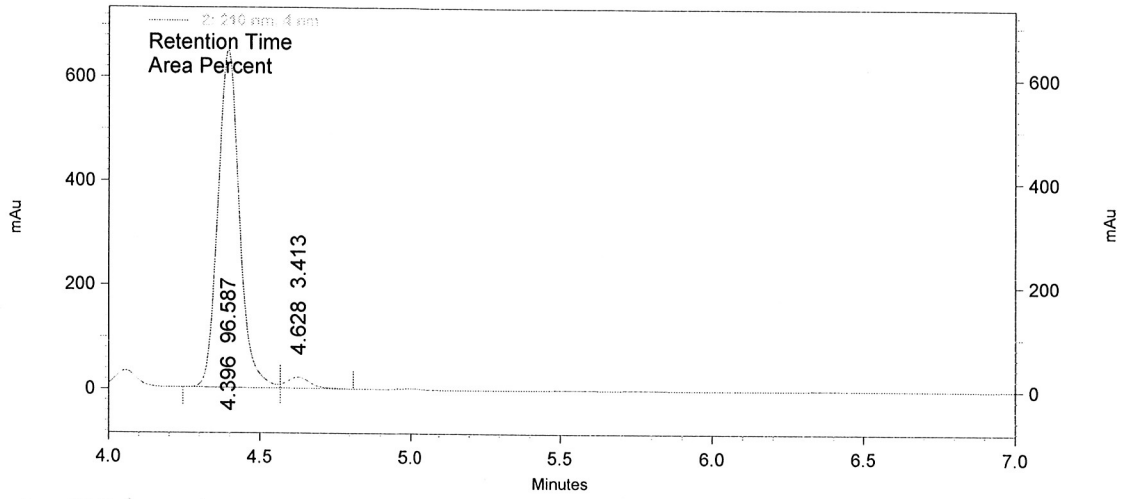

2: 210 nm, 4 nm  
Results

| Pk # | Retention Time | Area Percent | Lambda Max |
|------|----------------|--------------|------------|
| 1    | 4.396          | 96.587       | 205        |
| 2    | 4.628          | 3.413        | 205        |

8.221  
8.216  
7.750  
7.666  
7.661  
7.649  
7.644  
7.279  
7.185  
7.170  
7.143  
7.128  
7.112  
7.073  
7.058  
6.921  
6.912  
6.897  
6.882  
6.867  
6.852  
6.827  
6.811  
6.723  
6.706  
5.938  
5.926  
5.924  
5.911  
5.604  
3.985  
3.972  
3.954  
3.931  
3.581  
3.566  
3.509  
3.494  
2.942  
2.932  
2.920  
2.912  
2.866  
2.859  
2.847  
2.836  
2.729  
2.191  
2.155  
2.126  
1.873  
1.859  
1.714  
1.663  
1.334  
1.295  
1.283  
1.272  
1.248

```

NAME          JM-09-174P1
EXPNO         1
PROCNO        1
Date_         20121024
Time          11.41
INSTRUM       AV-500
PROBHD        5 mm TBI 1H/31
PULPROG       zg30
TD            65536
SOLVENT       CDCl3
NS            24
DS            0
SMH           10330.578 Hz
FIDRES        0.157632 Hz
AQ            3.171923 sec
RG            128
DM            48.400 usec
DE            6.00 usec
TE            293.7 K
D1            0.10000000 sec
TD0           3

===== CHANNEL f1 =====
NUC1          1H
P1            7.30 usec
PL1           0.00 dB
P1L1W        12.55943303 W
SFO1         500.2330889 MHz
SI           65536
SF           500.2330165 MHz
WDW           EM
SSB           0
LB            0.30 Hz
GB            0
PC            4.00
  
```

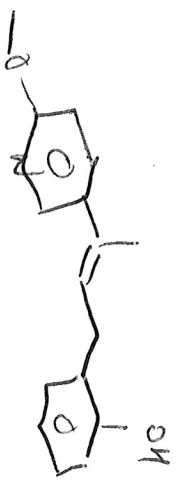

1.007  
1.049  
2.065  
2.682  
1.088  
1.019  
1.000  
3.292  
2.185  
3.819

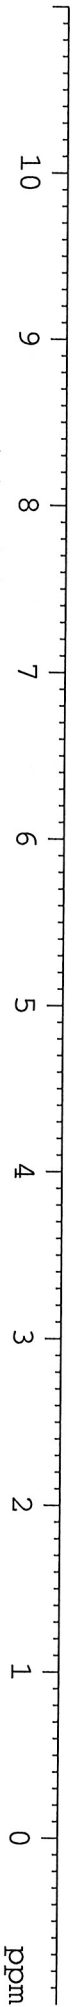



AVQ-400 QNP Carbon Starting parameters 7/16/03 revised 7/22/03 RN

- 163.13
- 153.93
- 143.64
- 136.28
- 132.98
- 132.20
- 129.95
- 127.51
- 126.66
- 125.36
- 120.75
- 115.39
- 110.14
- 77.30
- 76.99
- 76.67
- 53.53
- 29.63
- 15.72

```

NAME          JW-09-174carbon
EXPNO         1
PROCNO        1
Date_         20121024
Time_         12.41
INSTRUM       AVQ-400
PROBHD        5 mm QNP 1H/13
PULPROG       zgpg30
TD            65536
SOLVENT       CDCl3
NS            161
DS            0
SWH           24038.461 Hz
FIDRES        0.366798 Hz
AQ            1.3632196 sec
RG            16384
DW            20.800 usec
DE            6.00 usec
TE            294.0 K
D1            2.00000000 sec
D11           0.03000000 sec
TD0           1200

===== CHANNEL f1 =====
NUC1          13C
P1            8.50 usec
PL1           -2.00 dB
PL1W          47.77286148 W
SFO1          100.6228298 MHz

===== CHANNEL f2 =====
CPDPRG2       waltz16
NUC2          1H
PCPD2         70.00 usec
PL2           0.00 dB
PL12          15.00 dB
PL13          17.00 dB
PL2W          9.54516888 W
PL12W         0.30184472 W
PL13W         0.19045115 W
SFO2          400.1316000 MHz
SI            32768
SF            100.6127755 MHz
WDW           EM
SSB           0
LB            1.50 Hz
GB            0
PC            2.00
  
```

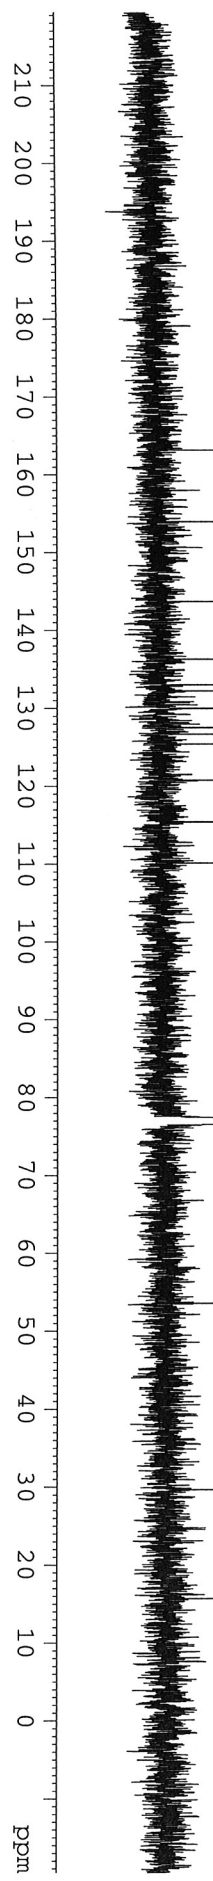

8.257  
8.252  
7.756  
7.706  
7.700  
7.685  
7.679  
7.268  
7.138  
7.120  
7.100  
7.061  
7.043  
6.912  
6.873  
6.854  
6.836  
6.789  
6.770  
6.750  
5.792  
5.731  
5.722  
5.711  
5.702  
5.613  
5.604  
5.593  
5.583  
5.399  
4.143  
3.964  
3.935  
3.779  
3.160  
3.150  
3.123  
3.114  
3.080  
3.070  
3.044  
3.034  
3.022  
3.001  
2.986  
2.975  
2.965  
2.954  
2.938  
2.918  
2.854  
2.837  
2.182  
2.060  
1.697  
1.653  
1.262

```

NAME          JW-09-176ent
EXPNO         1
PROCNO        1
Date_         20121025
Time          11.15
INSTRUM       AVO-400
PROBHD        5 mm QNP 1H/13
PULPROG       zg30
TD            65536
SOLVENT       CDCl3
NS            24
DS            0
SWH           8012.820 Hz
FIDRES       0.122266 Hz
AQ           4.0895586 sec
RG           322.5
DW           62.400 usec
DE           6.00 usec
TE           293.0 K
D1           1.00000000 sec
TD0          3

```

```

===== CHANNEL f1 =====
NUC1          1H
P1           12.80 usec
PL1          0.00 dB
SFO1         400.1324700 MHz
SF           400.1300142 MHz
WDW          EM
SSB          0
LB           0.30 Hz
GB           0
PC           4.00

```

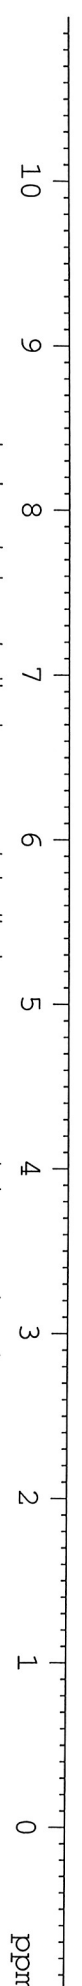

1.000  
1.021  
2.084  
3.053  
0.811  
1.146  
1.943  
2.945  
2.081

176 AVQ-400 NMR Carbon Starting Parameters 7/16/03

|      |               |       |   |        |   |       |          |      |       |         |         |        |                |         |        |    |       |         |       |    |     |    |   |     |              |        |             |    |               |    |       |    |             |    |           |    |         |    |               |     |               |     |       |
|------|---------------|-------|---|--------|---|-------|----------|------|-------|---------|---------|--------|----------------|---------|--------|----|-------|---------|-------|----|-----|----|---|-----|--------------|--------|-------------|----|---------------|----|-------|----|-------------|----|-----------|----|---------|----|---------------|-----|---------------|-----|-------|
| NAME | JW-09-176carb | EXPNO | 1 | PROCNO | 1 | Date_ | 20121025 | Time | 13.07 | INSTRUM | AVQ-400 | PROBHD | 5 mm QNP 1H/13 | PULPROG | zgpg30 | TD | 65536 | SOLVENT | CDCl3 | NS | 613 | DS | 0 | SWH | 24038.461 Hz | FIDRES | 0.366798 Hz | AQ | 1.3632196 sec | RG | 16384 | DW | 20.800 usec | DE | 6.00 usec | TE | 293.3 K | D1 | 2.0000000 sec | D11 | 0.0300000 sec | TDO | 10000 |
|------|---------------|-------|---|--------|---|-------|----------|------|-------|---------|---------|--------|----------------|---------|--------|----|-------|---------|-------|----|-----|----|---|-----|--------------|--------|-------------|----|---------------|----|-------|----|-------------|----|-----------|----|---------|----|---------------|-----|---------------|-----|-------|

```

===== CHANNEL F1 =====
NUC1      13C
P1         8.50 usec
PL1       -2.00 dB
PL1W      47.77286148 W
SFO1      100.6228298 MHz
  
```

```

===== CHANNEL F2 =====
CPDPRG2   waltz16
NUC2      1H
PCPD2     70.00 usec
PL2       0.00 dB
PL12     15.00 dB
PL13     17.00 dB
PL2W      9.54516888 W
PL12W     0.30184472 W
PL13W     0.19045115 W
SFO2      400.1316000 MHz
SI         32768
SF        100.6127755 MHz
WDW        EM
SSB         0
LB         1.50 Hz
GB         0
PC         2.00
  
```

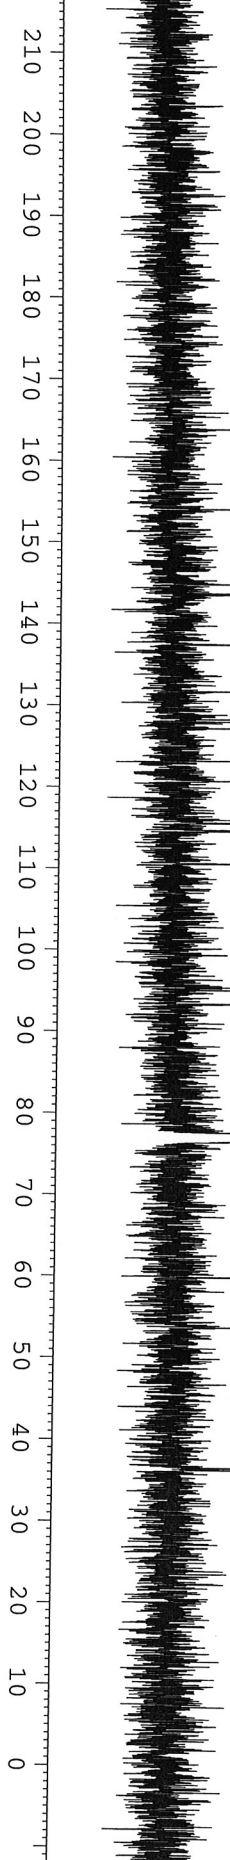

- 163.88
- 154.00
- 144.88
- 143.70
- 143.55
- 137.44
- 131.69
- 128.22
- 127.22
- 123.11
- 120.66
- 115.55
- 114.96
- 114.55
- 110.55
- 95.01
- 93.28
- 77.30
- 76.98
- 76.67
- 53.63
- 36.44
- 36.21

AVQ-400 QNP Probe 19F starting parameters. (revised P1, 2/12/04 RN)  
 chemical shifts relative to CFCl3 at 0 ppm (082103 HVH)  
 SW 239.28 ppm; o1p 0 ppm

```

NAME          JW-09-176Fent
EXPNO         1
PROCNO        1
Date_         20121025
Time_         11.18
INSTRUM       AVQ-400
PROBHD        5 mm QNP 1H/13
PULPROG       zgfgm
TD            131072
SOLVENT       CDCl3
NS            18
DS            0
SMH           90090.094 Hz
FIDRES        0.687333 Hz
AQ            0.7275051 sec
RG            4597.6
DW            5.550 usec
DE            6.00 usec
TE            293.0 K
D1            1.00000000 sec
TD0           3
  
```

```

===== CHANNEL f1 =====
NUC1          19F
P1            16.00 usec
PL1           -3.00 dB
PL1W          20.04748917 W
SFO1          376.4607042 MHz
SI            65536
SF            376.4980736 MHz
WDW           EM
SSB           0
LB            2.00 Hz
GB            0
PC            4.00
  
```

174.32  
 174.37  
 174.41  
 174.45  
 174.50  
 174.53  
 174.58

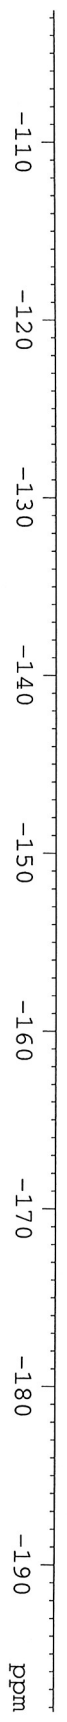

JW-09-176rac

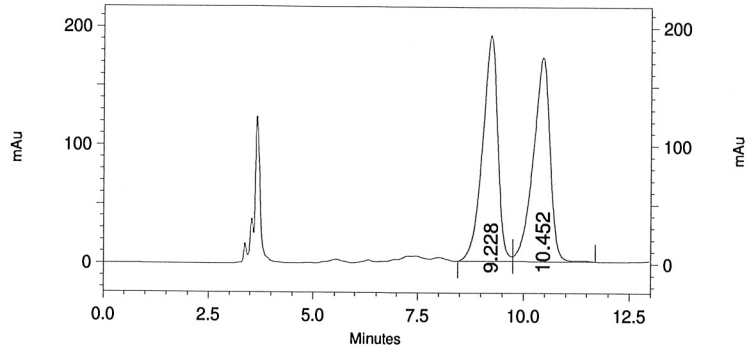

1: 222 nm, 4  
nm Results

| Retention Time | Area    | Area Percent | Lambda Max |
|----------------|---------|--------------|------------|
| 9.228          | 4754400 | 50.011       | 205        |
| 10.452         | 4752224 | 49.989       | 205        |

JW-09-176ent

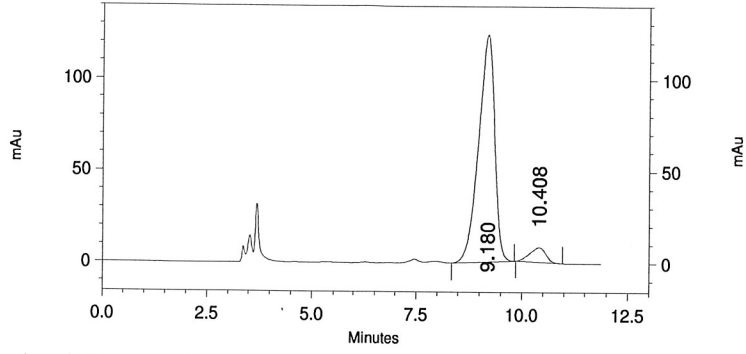

1: 222 nm, 4  
nm Results

| Retention Time | Area    | Area Percent | Lambda Max |
|----------------|---------|--------------|------------|
| 9.180          | 3250038 | 93.910       | 245        |
| 10.408         | 210767  | 6.090        | 246        |

195 trit AVB-400 ZBO Proton starting parameters. 6/11/03 RN

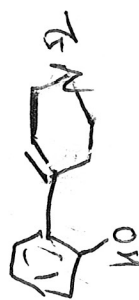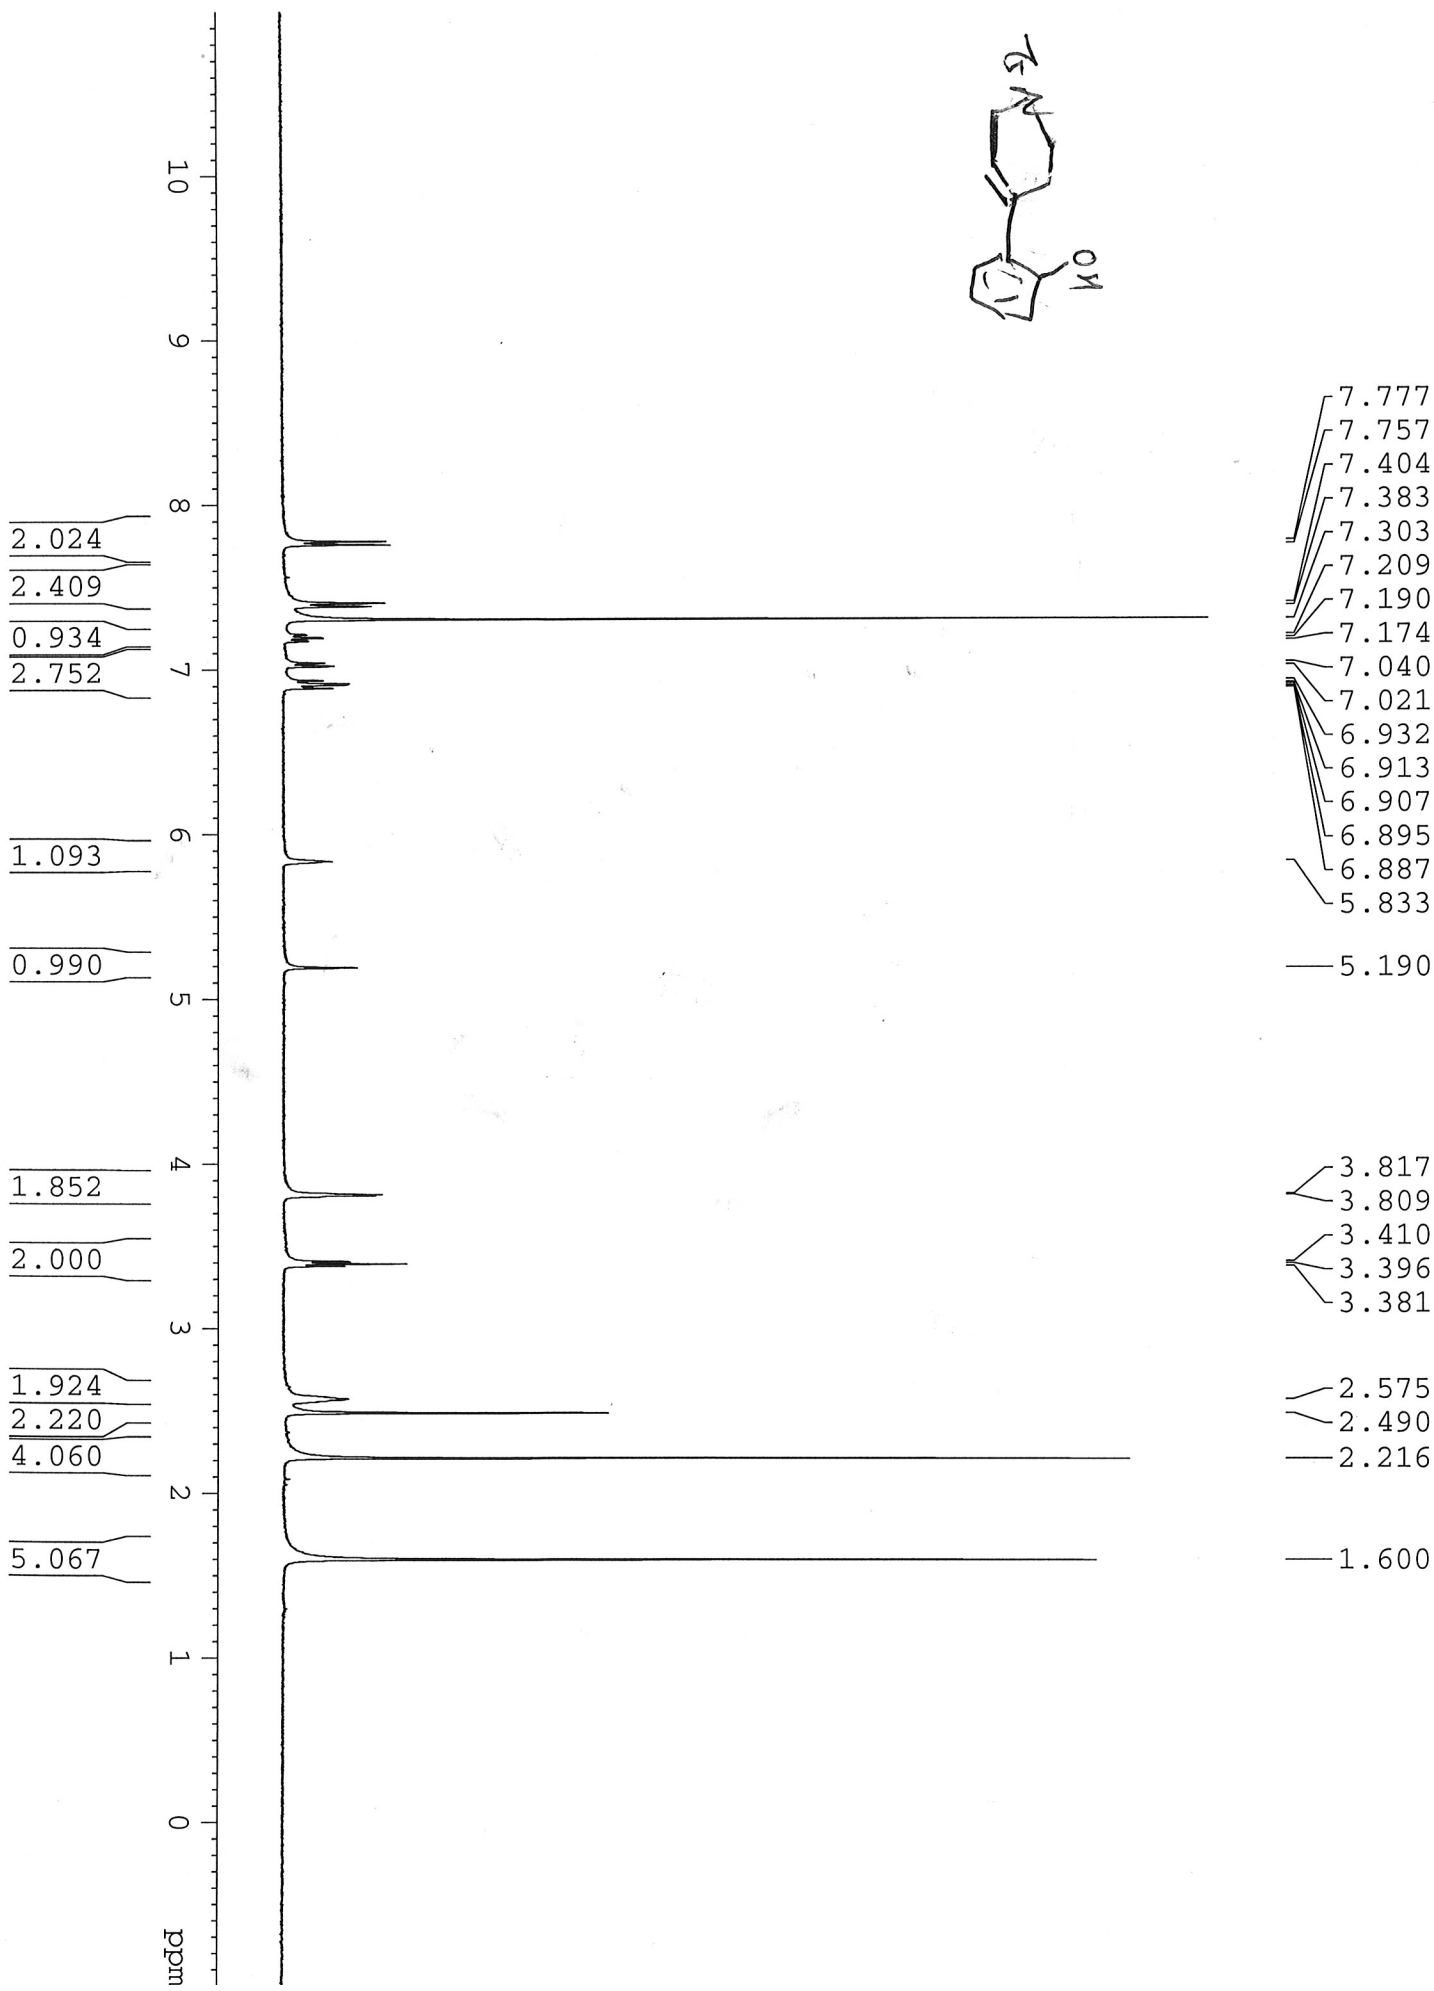

199 AVB-400 ZBO Carbon Starting paramters 6/11/03

152.22  
 143.92  
 134.01  
 133.09  
 129.81  
 128.90  
 128.32  
 127.79  
 122.45  
 121.08  
 120.55  
 115.80  
 115.46

77.39  
 77.07  
 76.75

45.02  
 43.15

29.42

21.58

NAME JW-09-199carb  
 EXPNO 1  
 PROCNO 1  
 Date\_ 20121114  
 Time 17.30  
 INSTRUM AVB-400  
 PROBHD 5 mm PABBO BB-  
 PULPROG zgpg30  
 TD 65536  
 SOLVENT CDCl3  
 NS 241  
 DS 0  
 SWH 23980.814 Hz  
 FIDRES 0.365918 Hz  
 AQ 1.3664756 sec  
 RG 16384  
 DM 20.850 usec  
 DE 6.00 usec  
 TE 294.8 K  
 D1 1.50000000 sec  
 D11 0.03000000 sec  
 TD0 1000

==== CHANNEL f1 =====  
 NUCl 13C  
 P1 8.50 usec  
 PL1 -2.00 dB  
 PL1W 47.77286148 W  
 SFO1 100.6228298 MHz

==== CHANNEL f2 =====  
 CPDPRG2 waltz16  
 NUCl 1H  
 PCPD2 70.00 usec  
 PL2 -3.00 dB  
 PL12 16.00 dB  
 PL13 16.00 dB  
 PL2W 23.05461311 W  
 PL12W 0.29024038 W  
 PL13W 0.29024038 W  
 SFO2 400.1316005 MHz  
 SI 32768  
 SF 100.6127690 MHz  
 WDW EM  
 SSB 0  
 LB 1.50 Hz  
 GB 0  
 PC 1.40

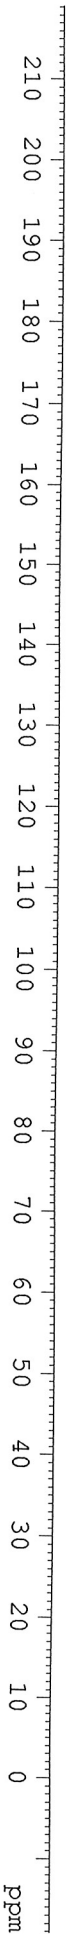

ppm



203 AVB-400 ZBO Proton starting parameters. 6/11/03 RN

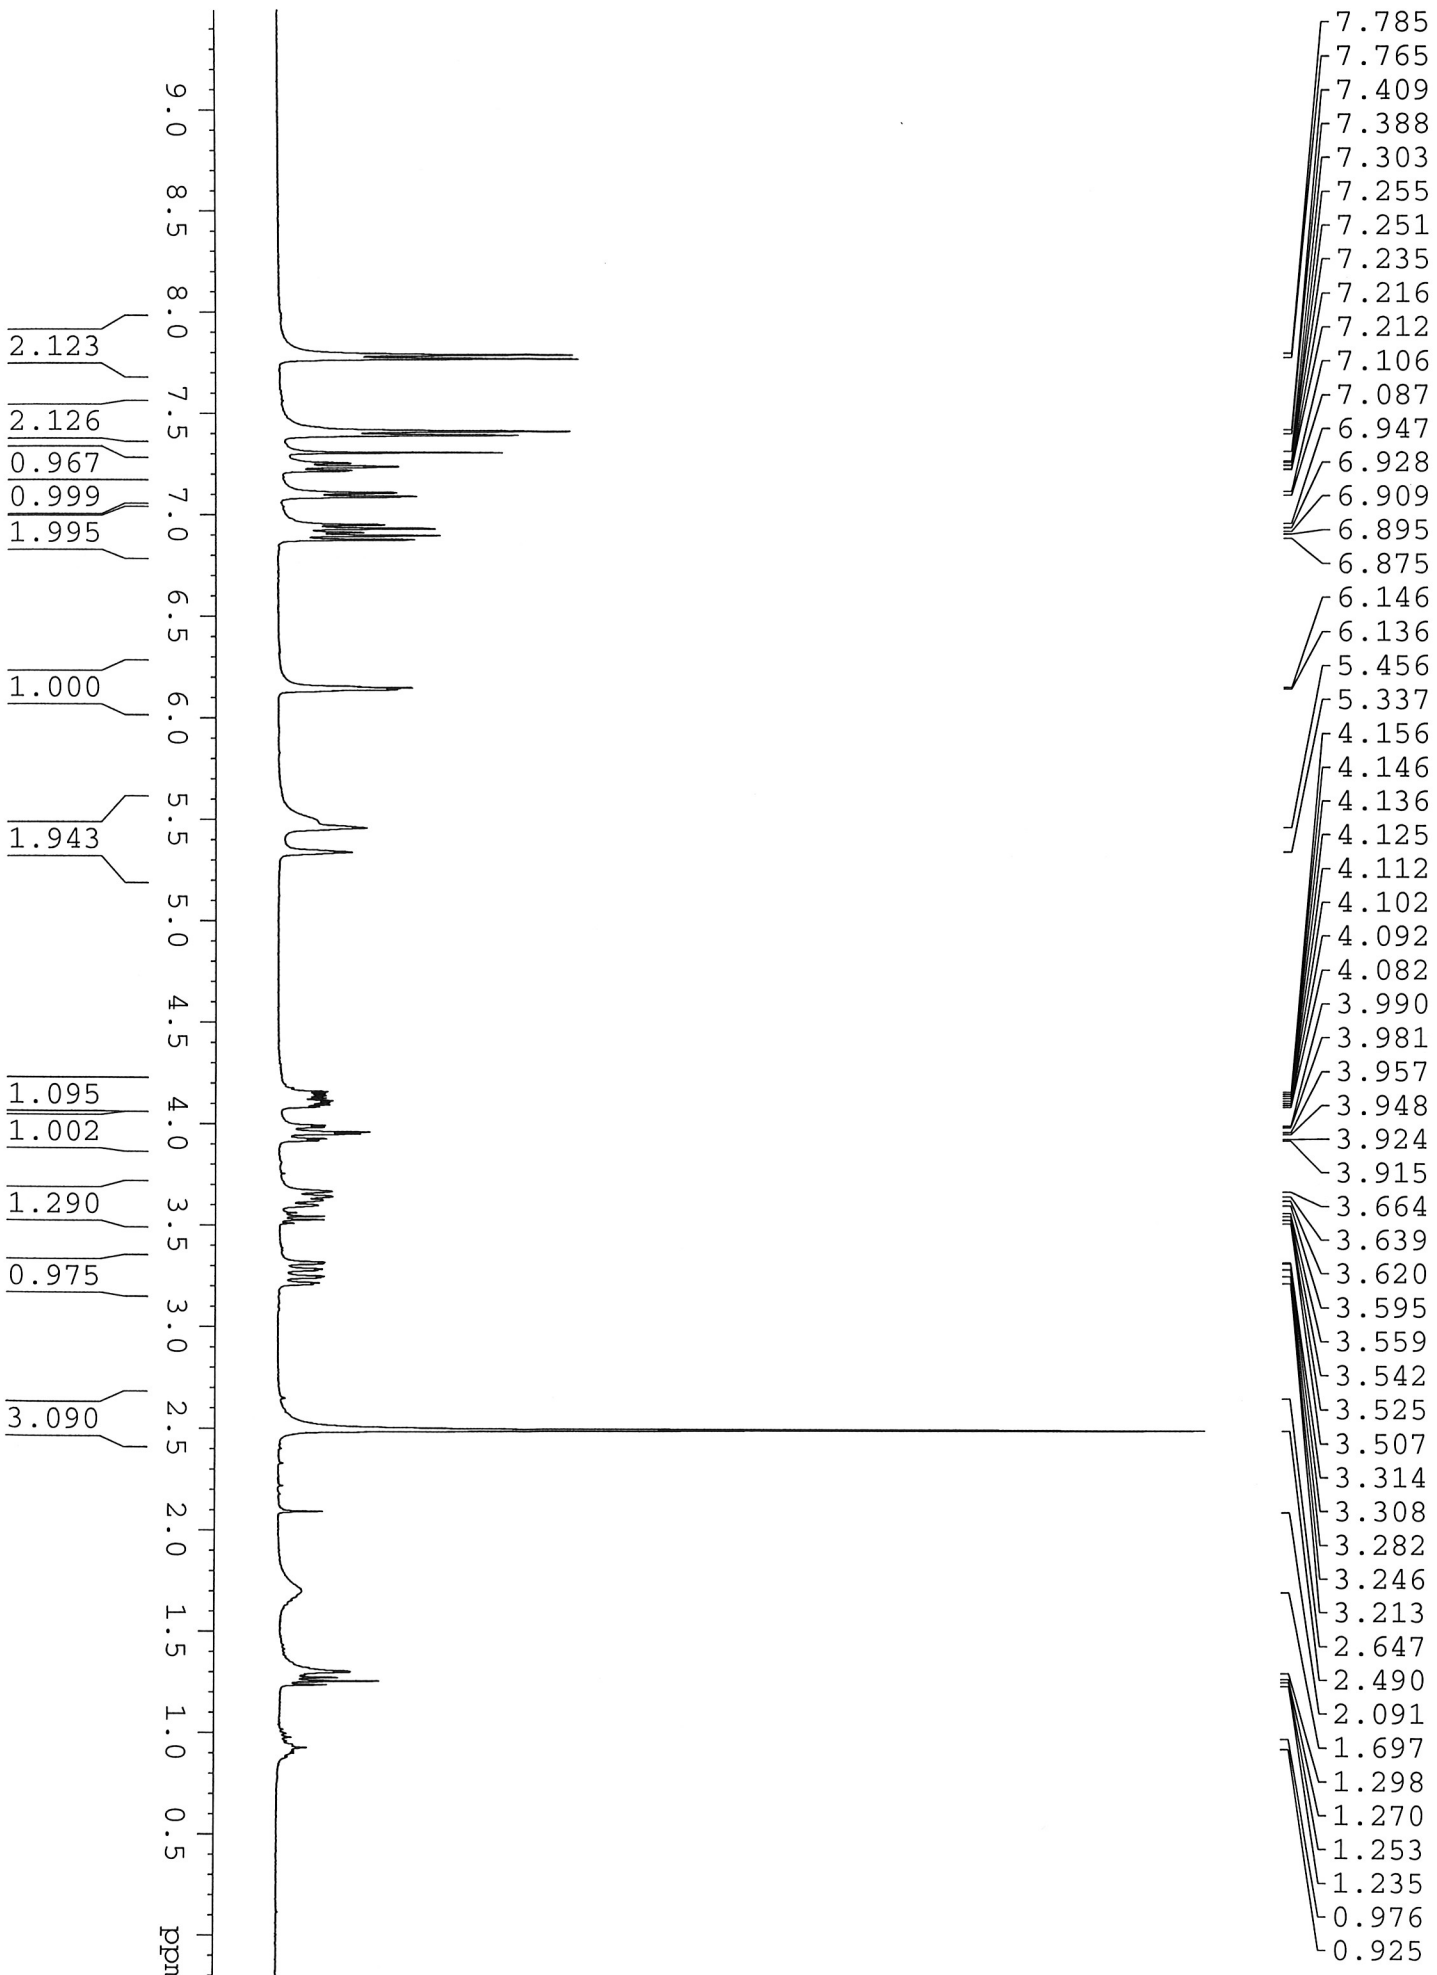

203 AVB-400 ZBO Carbon Starting paramters 6/11/03

- 153.05
- 144.16
- 133.20
- 132.68
- 132.52
- 129.90
- 129.77
- 129.70
- 129.63
- 129.56
- 127.83
- 125.03
- 120.79
- 116.14
  
- 85.85
- 84.14
- 77.37
- 77.05
- 76.74
  
- 65.91
  
- 47.65
- 47.40
- 44.89
  
- 21.59

```

NAME          JW-09-203pidriedCarb
EXPNO         1
PROCNO        1
Date_         20121114
Time_         14:28
INSTRUM       5 mm PABBO BB-
PROBHD        zgpg30
PULPROG       zgpg30
TD            65536
SOLVENT       CDCl3
NS            504
DS            0
SMH           23980.814 Hz
FIDRES        0.365918 Hz
AQ            1.3664756 sec
RG            16384
DW            20.850 usec
DE            6.00 usec
TE            295.0 K
D1            1.5000000 sec
D11           0.0300000 sec
TD0           10000

===== CHANNEL f1 =====
NUC1           13C
P1             8.50 usec
PL1            -2.00 dB
PL1W           47.77286148 W
SFO1           100.6228298 MHz

===== CHANNEL f2 =====
CPDPRG2       waltz16
NUC2           1H
PCPD2         70.00 usec
PL2            -3.00 dB
PL12           16.00 dB
PL13           16.00 dB
PL2W           23.05461311 W
PL12W          0.28024038 W
PL13W          0.29024038 W
SFO2           400.1316005 MHz
SI            32768
SF            100.6127690 MHz
WDW            EM
SSB            0
LB            1.50 Hz
GB            0
PC            1.40
  
```

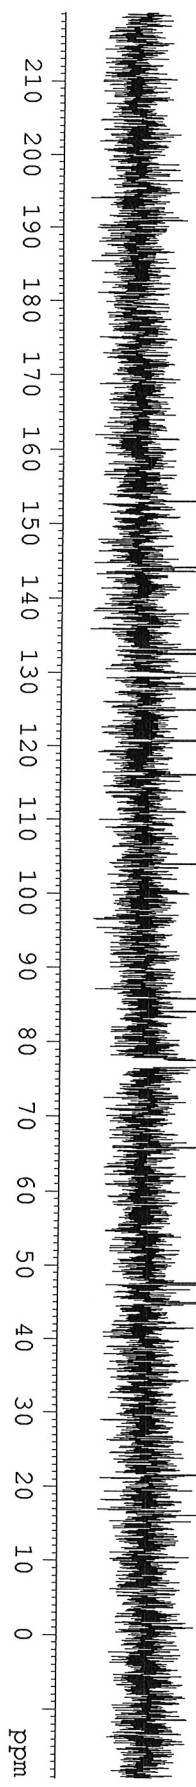

AVQ-400 QNP Probe 19F starting parameters. (revised P1, 2/12/04 RN)  
 chemical shifts relative to CFCl3 at 0 ppm (082103 HvH)  
 sw 239.28 ppm; o1p 0 ppm

```

NAME          JW-09-198p1F
EXPNO         1
PROCNO        1
Date_         20121107
Time          11.47
INSTRUM       AVQ-400
PROBHD        5 mm QNP 1H/13
PULPROG       zgfgm
TD            131072
SOLVENT       CDCl3
NS            16
DS            0
SWH           90090.094 Hz
FIDRES        0.687333 Hz
AQ            0.7275051 sec
RG            2896.3
DW            5.550 usec
DE            6.00 usec
TE            293.2 K
D1            1.00000000 sec
TD0           4
  
```

```

===== CHANNEL f1 =====
NUC1          19F
P1            16.00 usec
PL1           -3.00 dB
PL1W          20.04748917 W
SFO1          376.4607042 MHz
SI            65536
SF            376.4980736 MHz
WDW           EM
SSB           0
LB            2.00 Hz
GB            0
PC            4.00
  
```

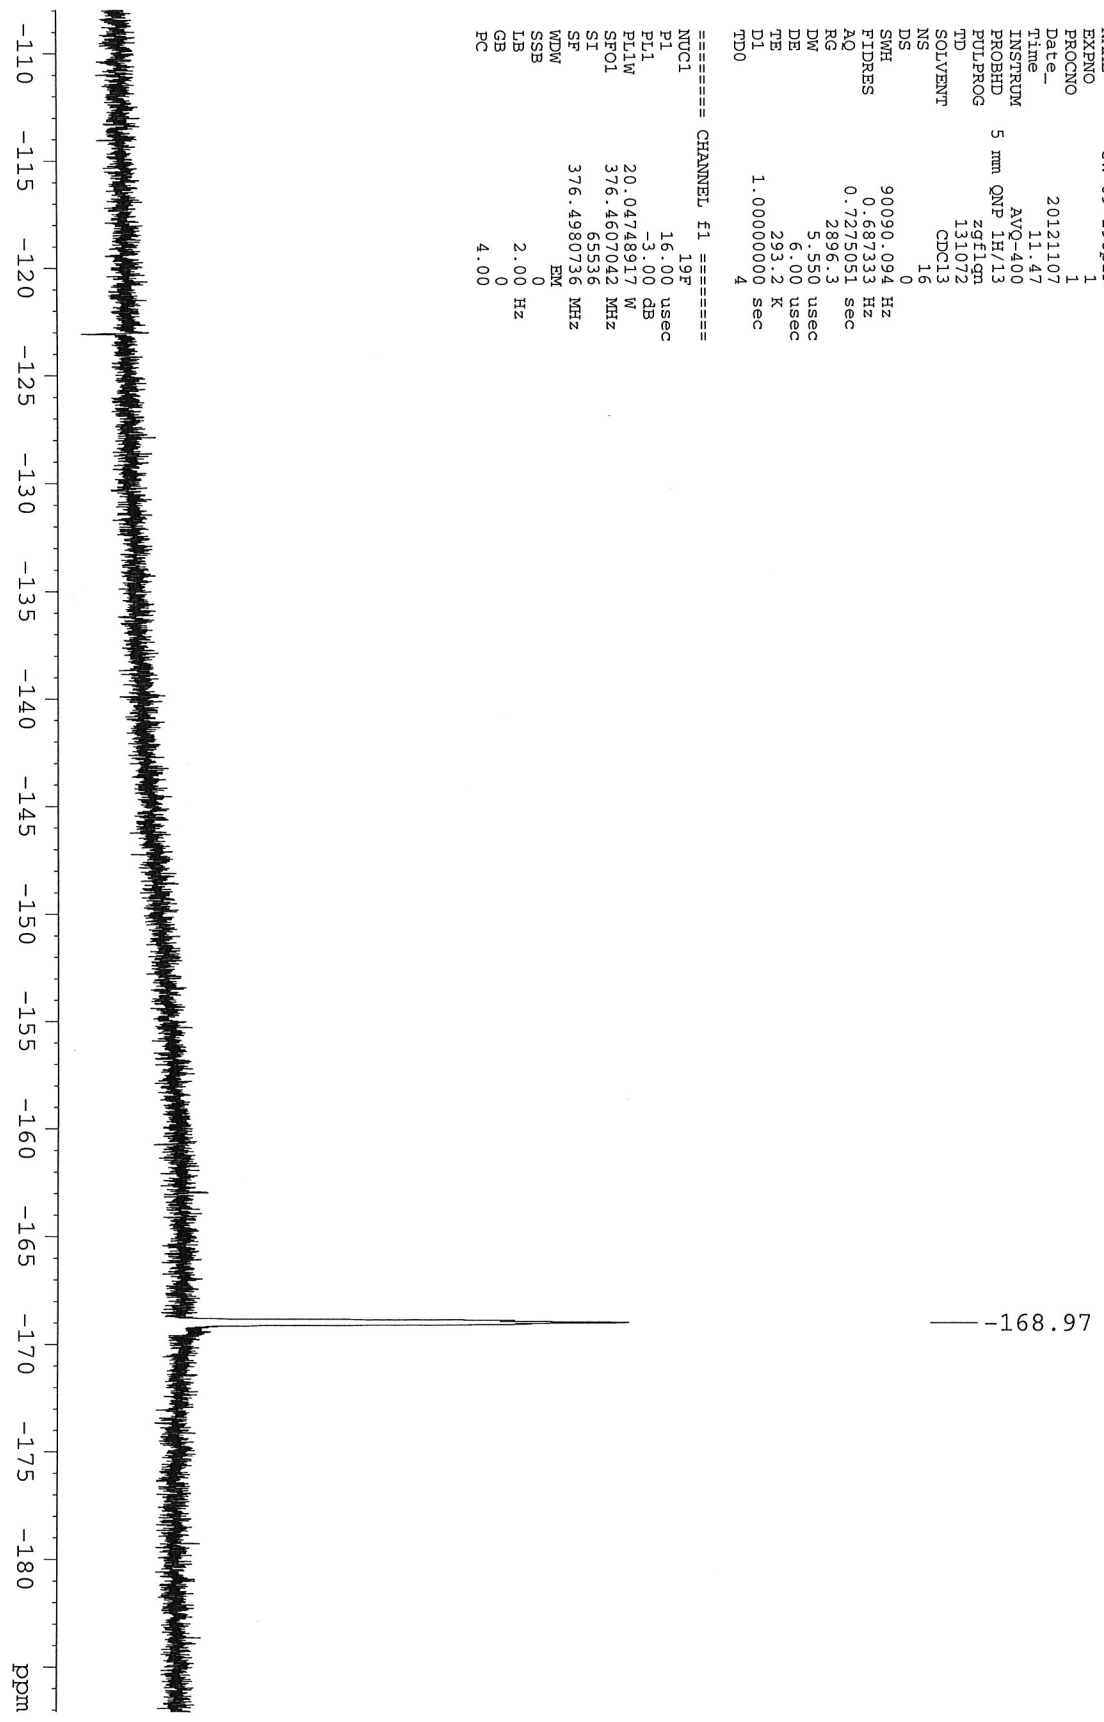

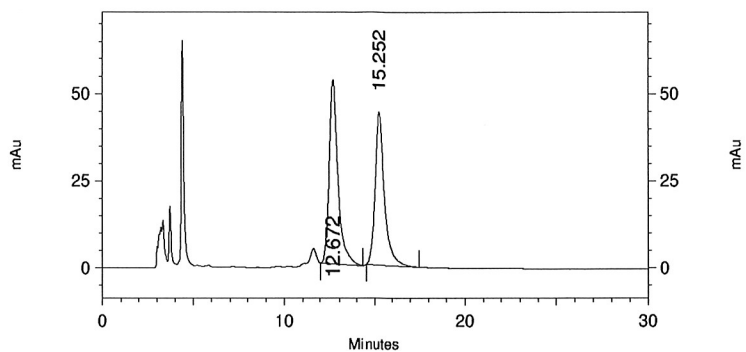

1: 223 nm, 4

nm Results

| Retention Time | Area    | Area Percent | Lambda Max |
|----------------|---------|--------------|------------|
| 12.672         | 1731570 | 50.077       | 208        |
| 15.252         | 1726247 | 49.923       | 208        |

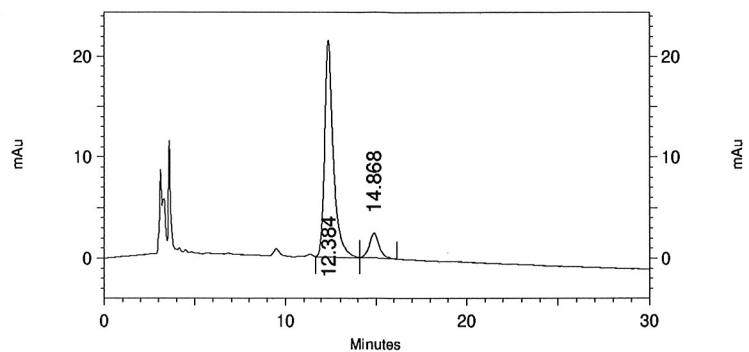

1: 223 nm, 4

nm Results

| Retention Time | Area   | Area Percent | Lambda Max |
|----------------|--------|--------------|------------|
| 12.384         | 685715 | 88.375       | 207        |
| 14.868         | 90201  | 11.625       | 206        |

7.411  
7.392  
7.324  
7.307  
7.287  
7.268  
7.234  
7.215  
7.197  
7.167  
7.145  
7.063  
7.046  
6.965  
6.946  
6.927  
6.903  
6.884  
6.852  
6.832  
6.709  
6.398  
5.309  
5.196  
5.156  
4.969  
4.757  
4.235  
4.218  
3.726  
3.688  
3.620  
2.895  
2.874  
2.853  
2.806  
2.787  
2.768  
2.677  
2.594  
2.413  
2.323  
2.256  
2.228  
2.180  
2.148  
1.889  
1.843  
1.725  
1.693  
1.674  
1.595  
1.364  
1.347  
1.329  
1.067  
1.050  
0.977

NAME JW-10-40-pH  
EXPNO 1  
PROCNO 1  
Date\_ 20130108  
Time 11.43  
INSTRUM AVQ-400  
PROBHD 5 mm QNP 1H/13  
PULPROG zg30  
TD 65536  
SOLVENT CDC13  
NS 8  
DS 0  
SWH 8012.820 Hz  
FIDRES 0.122266 Hz  
AQ 4.0895586 sec  
RG 45.3  
DM 62.400 usec  
DE 6.00 usec  
TE 292.8 K  
D1 1.00000000 sec  
TD0 2

==== CHANNEL f1 =====  
NUC1 1H  
P1 12.80 usec  
PL1 0.00 dB  
PL1W 9.54516888 W  
SFO1 400.1324700 MHz  
SI 65536  
SF 400.1300142 MHz  
WDW EM  
SSB 0  
LB 0.30 Hz  
GB 0  
PC 4.00

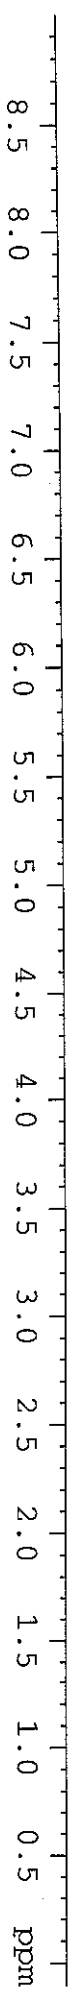

1.038  
1.261  
4.365  
1.088  
0.942

0.965

2.000

2.044

5.196

```

NAME JW-10-40p1Carbon
EXPNO 1
PROCNO 1
Date_ 20130108
Time_ 11.55
INSTRUM AVQ-400
PROBHD 5 mm QNP 1H/13
PULPROG zgpg30
TD 65536
SOLVENT CDCl3
NS 59
DS 0
SWH 24038.461 Hz
FIDRES 0.366798 Hz
AQ 1.3632196 sec
RG 16384
DW 20.800 usec
DE 6.00 usec
TE 292.8 K
D1 2.00000000 sec
D11 0.03000000 sec
TD0 11000
    
```

```

===== CHANNEL f1 =====
NUC1 13C
P1 8.50 usec
PL1 -2.00 dB
PL1W 47.77286148 W
SFO1 100.6228298 MHz
    
```

```

===== CHANNEL f2 =====
CPDPRG2 waitz16
NUC2 1H
PCPD2 70.00 usec
PL2 0.00 dB
PL12 15.00 dB
PL13 17.00 dB
PL2W 9.54516888 W
PL12W 0.30184472 W
PL13W 0.19045115 W
SFO2 400.1316000 MHz
SI 32768
SF 100.6127755 MHz
WDW EM
SSB 0
LB 1.50 Hz
GB 0
PC 1.40
    
```

154.37  
 136.74  
 135.79  
 133.76  
 130.18  
 127.85  
 127.60  
 127.17  
 126.45  
 126.34  
 125.56  
 123.13  
 120.85  
 115.98  
 115.54

77.42  
 77.11  
 76.79

34.43  
 28.55  
 28.05

14.45

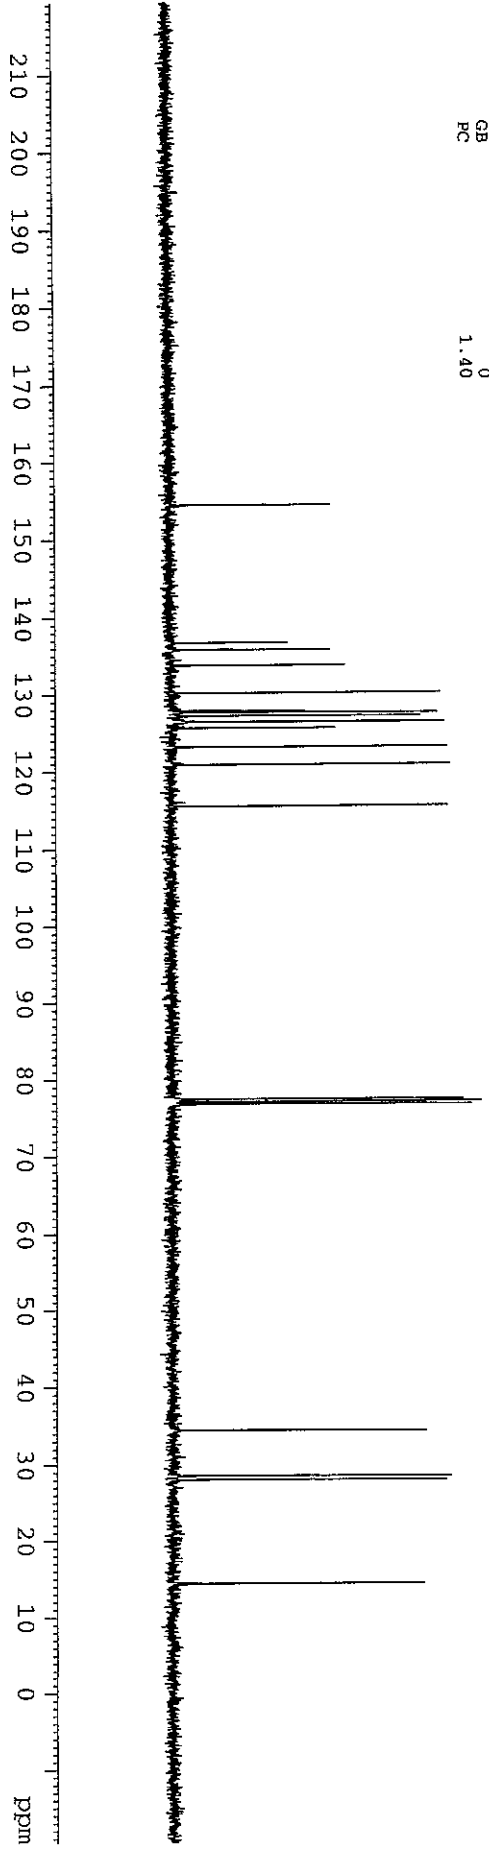

7.731  
7.628  
7.611  
7.605  
7.553  
7.293  
7.279  
7.275  
7.267  
7.264  
7.257  
7.251  
7.233  
7.212  
7.208  
7.188  
7.173  
7.170  
7.145  
7.133  
6.970  
6.952  
6.936  
6.873  
6.855  
6.836  
5.964  
5.911  
5.626  
5.618  
5.354  
3.227  
3.189  
3.166  
3.127  
3.106  
3.068  
3.060  
3.029  
3.016  
2.991  
2.178  
2.162  
2.151  
2.134  
2.124  
2.118  
2.110  
1.748  
1.725  
1.633  
1.605  
1.270  
0.954  
0.938  
0.886  
0.875  
0.861

NAME JW-10-41p1  
EXPNO 1  
PROCNO 1  
Date\_ 20130109  
Time 13.58  
INSTRUM AVQ-400  
PROBHD 5 mm QNP 1H/13  
PULPROG zg30  
TD 65536  
SOLVENT CDC13  
NS 27  
DS 0  
SWH 8012.820 Hz  
FIDRES 0.122266 Hz  
AQ 4.0895586 sec  
RG 228.1  
DW 62.400 usec  
DE 6.00 usec  
TE 293.1 K  
D1 1.00000000 sec  
TD0 4

==== CHANNEL f1 =====  
NUC1 1H  
P1 12.80 usec  
PL1 0.00 dB  
PL1W 9.54516888 W  
SFO1 400.1324700 MHz  
SI 65536  
SF 400.1300142 MHz  
WDW EM  
SSB 0  
LB 0.30 Hz  
GB 0  
PC 4.00

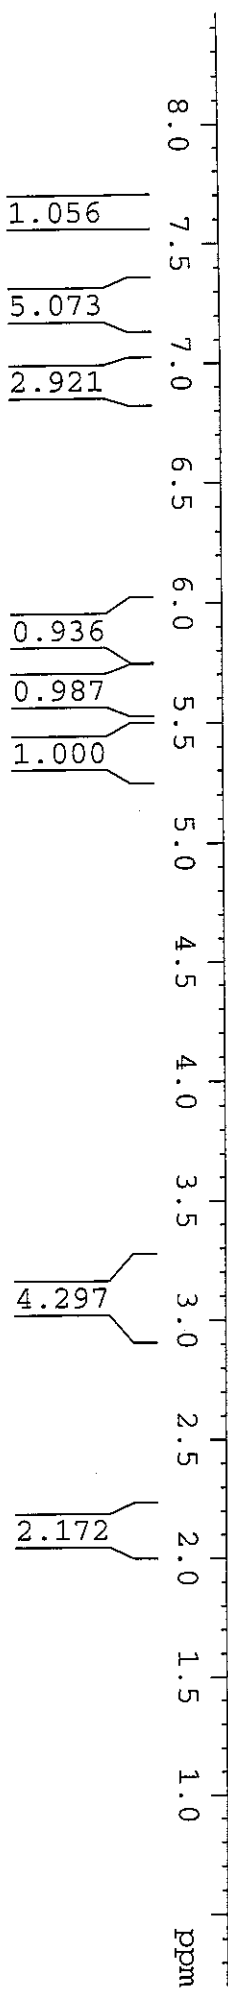



Current Data Parameters  
 NAME JW-10-41Carbon  
 EXPNO 1  
 PROCNO 1

155.04  
 144.90  
 134.52  
 133.12  
 133.09  
 132.59  
 128.80  
 128.77  
 128.32  
 126.69  
 125.13  
 125.11  
 121.90  
 120.55  
 116.98  
 108.92  
 108.82  
 100.23  
 98.83

38.95  
 38.79  
 32.18  
 32.00  
 26.88  
 26.88

F2 - Acquisition Parameters  
 Date\_ 20130109  
 Time 16:03  
 INSTRUM DRX-500  
 PROBHD 5 mm BBO BB-1H  
 PULPROG zgpg30  
 TD 65536  
 SOLVENT CDCl3  
 NS 374  
 DS 0  
 SWH 41322.312 Hz  
 FIDRES 0.630528 Hz  
 AQ 0.7930356 sec  
 RG 8192  
 DM 12.100 usec  
 DE 6.00 usec  
 TE 292.7 K  
 D1 2.00000000 sec  
 d11 0.03000000 sec  
 DELTA 1.89999998 sec  
 TDO 10000

CHANNEL F1  
 NUC1 13C  
 P1 11.25 usec  
 PL1 0.00 dB  
 SFO1 125.7779086 MHz

CHANNEL F2  
 CPDPRG2 waltz16  
 NUC2 1H  
 PCPDD2 100.00 usec  
 PL2 -5.00 dB  
 PL12 11.48 dB  
 PL13 22.00 dB  
 SFO2 500.1621561 MHz

F2 - Processing parameters  
 SI 131072  
 SF 125.7653520 MHz  
 WDW EM  
 SSB 0  
 LB 0.75 Hz  
 GB 0  
 PC 2.00

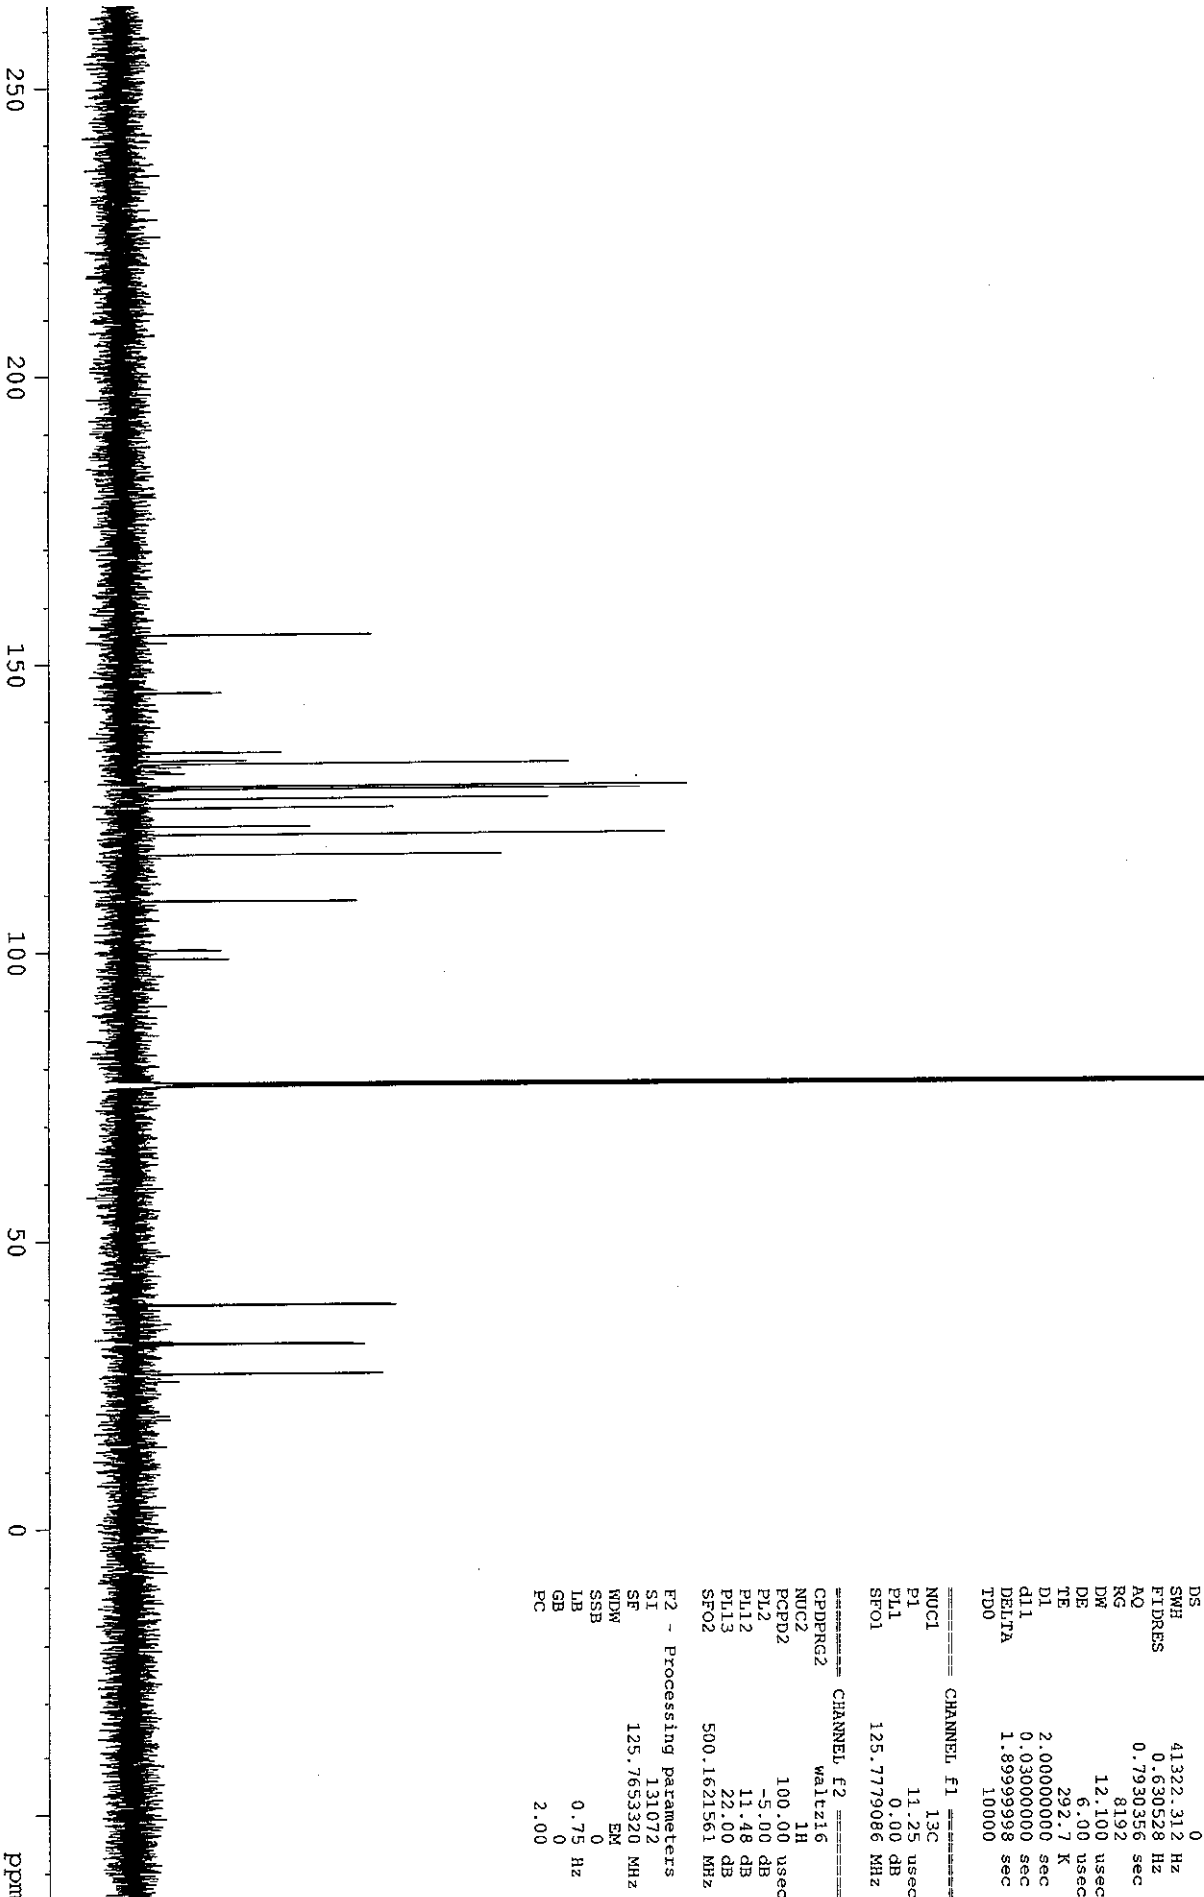

AVQ-400 QNP Probe 19F starting parameters. (revised P1, 2/12/04 RN)  
 chemical shifts relative to CFCl3 at 0 ppm (082103 HVH)  
 Sw 239.28 ppm; o1p 0 ppm

137.12  
 137.15  
 137.18  
 137.21  
 137.26  
 149.25

```

NAME          JW-10-41p1f-100
EXPNO         1
PROCNO        1
Date_         20130109
Time_         13.55
INSTRUM       AVQ-400
PROBHD        5 mm QNP 1H/13
PULPROG       zgfg1gm
TD            131072
SOLVENT       CDCl3
NS            32
DS            0
SWH           90090.094 Hz
FIDRES        0.687333 Hz
AQ            0.7275051 sec
RG            3251
DE            5.550 usec
TE            293.1 K
D1            1.00000000 sec
TD0           4

===== CHANNEL f1 =====
NUC1          19F
P1            16.00 usec
PL1           -3.00 dB
PL1W          20.04748917 W
SFO1          376.4607042 MHz
SI            65536
SF            376.4980736 MHz
WDW           EM
SSB           0
LB            2.00 Hz
GB            0
PC            4.00
  
```

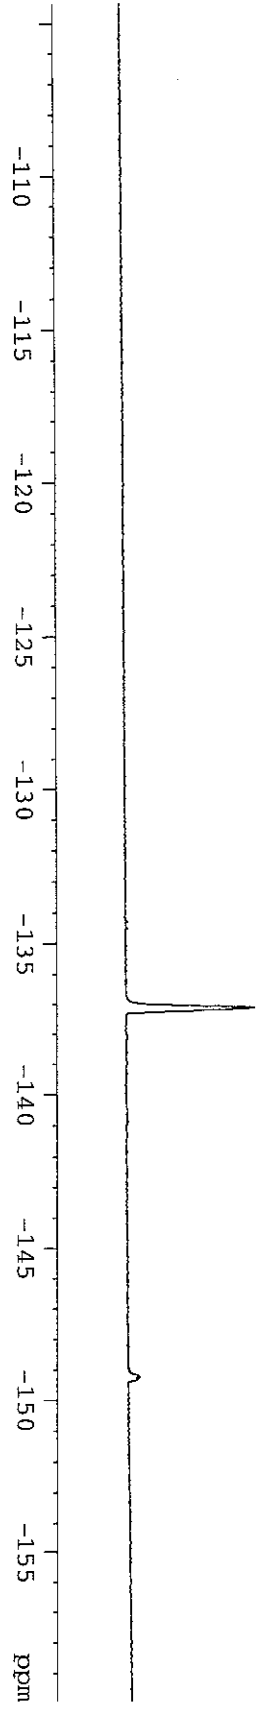

JW-10-41rac

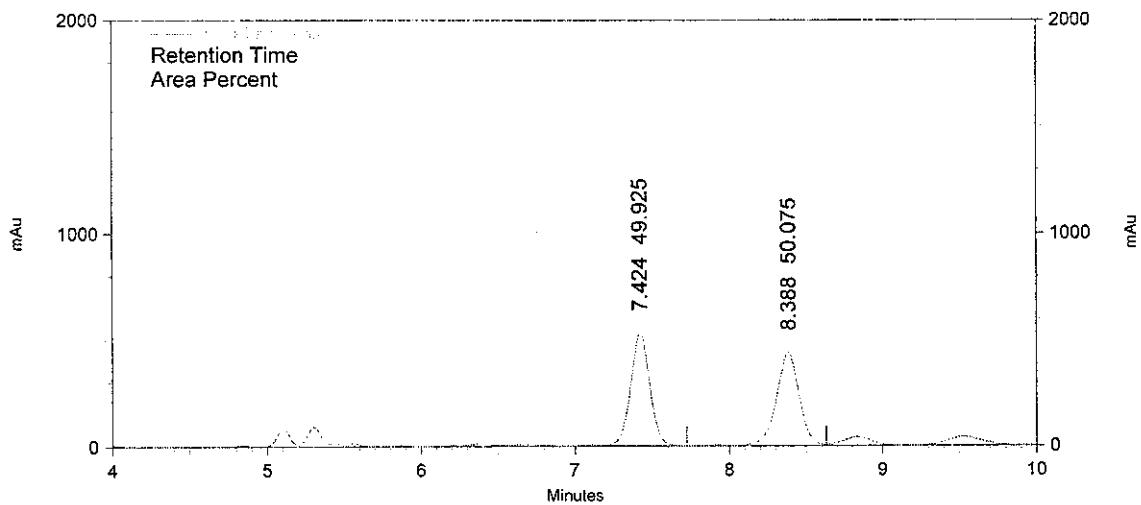

1: 190 nm, 4 nm  
Results

| Pk # | Retention Time | Area Percent | Lambda Max |
|------|----------------|--------------|------------|
| 1    | 7.424          | 49.925       | 203        |
| 2    | 8.388          | 50.075       | 203        |

JW-10-41

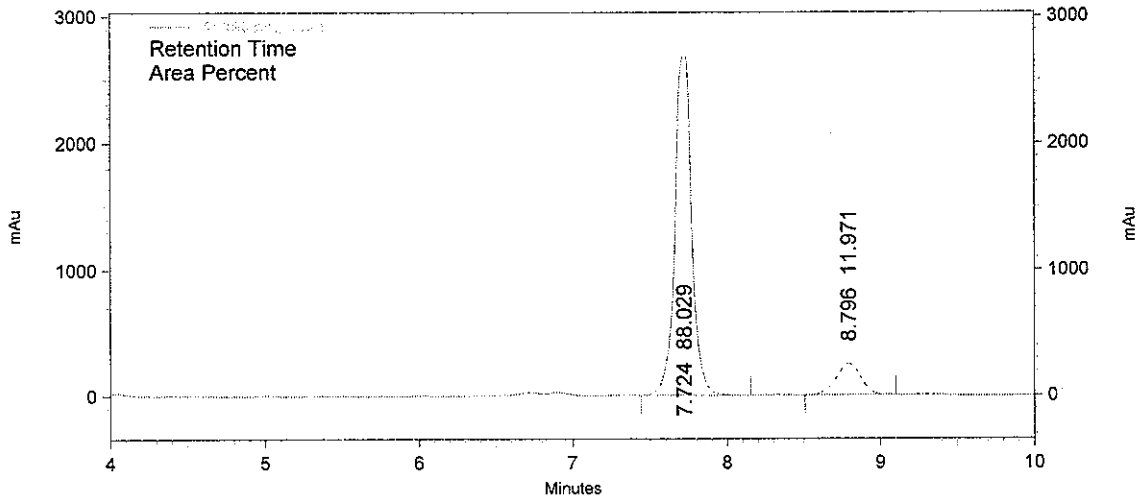

1: 190 nm, 4 nm

Results

| Pk # | Retention Time | Area Percent | Lambda Max |
|------|----------------|--------------|------------|
| 1    | 7.724          | 88.029       | 247        |
| 2    | 8.796          | 11.971       | 203        |
